# Supplementary material for: Cervicovaginal microbiome alters transcriptomic and epigenomic signatures across cervicovaginal epithelial barriers
Source: Research Square preprint supplement (doi:10.21203/rs.3.rs-6171614/v1), 2025-05-07
Supplement: Supplementary file 2 [file 40a17c0a3f5cfc497f6d3d9a.docx]

Supplemental Table 3: List of overlapping genes altered by bacteria exposure between epithelial cell types.

| LC sups | | | | GV sups | | | |
| --- | --- | --- | --- | --- | --- | --- | --- |
| ecto/endo  n=133 | ecto/vag  n=67 | endo/vag  n=61 | ecto/endo/vag  n=83 | ecto/endo  n=3 | ecto/vag  n=3 | endo/vag  n=39 | ecto/endo/vag  n=5 |
| RCN3 | CCNA1 | MMP2 | HSPB8 | PDZK1IP1 | STC1 | CXCL10 | CSF3 |
| KPNA7 | PTPRR | PSTPIP1 | NGF | IL36G | RUNDC3A | CTSS | CXCL1 |
| OR2B6 | TMEM151A | SLC16A14 | CALB1 | IFITM1 | novel protein | IL23A | ZP4 |
| CILP | GDF15 | TGM2 | GPNMB |  |  | INHBA | SAA1 |
| DNAI1 | KBTBD13 | DPP4 | H3C10 |  |  | CCL20 | MMP9 |
| MMRN2 | AKR1B10 | RASAL1 | H4C8 |  |  | PTGS2 |  |
| CCL22 | PTPRZ1 | KCNQ5 | PHACTR3 |  |  | IL1R2 |  |
| CRYM | NOS1 | AKR1C2 | SQSTM1 |  |  | SAA2 |  |
| ARHGAP30 | LCE1B | AHR | PRR19 |  |  | TRHDE |  |
| WFDC5 | SEMA3A | LGALS7B | FAM72B |  |  | KRT34 |  |
| UAP1L1 | IQCH | JPH2 | TNFSF15 |  |  | MRGPRX3 |  |
| SCX | DNASE1L3 | TBC1D3B | H2AC8 |  |  | CXCL8 |  |
| NEFH | FAM110C | ABCC2 | SRPK3 |  |  | CD70 |  |
| ZNF556 | H3C14 | HR | H2BC7 |  |  | BIRC3 |  |
| GSTA4 | NEFM | RHCE | H2BC5 |  |  | SERPINB2 |  |
| LAMP3 | TLCD3B | ETV7 | CALHM5 |  |  | ZC3H12A |  |
| KLHL30 | CDH2 | S1PR4 | NUPR1 |  |  | IL32 |  |
| LRRC75A | EGR1 | CYP7B1 | TENT5C |  |  | TGM2 |  |
| PIBF1 | MGAT5B | PTGS2 | H2BC11 |  |  | XAF1 |  |
| NCF2 | ZCCHC12 | CPM | PSG4 |  |  | KRT4 |  |
| KRTAP3-2 | CLDN9 | NPIPB7 | ALPP |  |  | VNN1 |  |
| PRR22 | MYPN | FAM166B | FTL |  |  | NFKB2 |  |
| KLHDC7B | H1-5 | ITGB8 | RRAD |  |  | G0S2 |  |
| SHOC1 | H2BC9 | C8orf88 | FTH1 |  |  | TNFRSF1B |  |
| PTPRB | ESPNL | CAVIN2 | NGFR |  |  | TNFAIP3 |  |
| STX19 | APOBEC3A | MAPK8IP2 | TMEM8B |  |  | TNIP1 |  |
| MFAP5 | NEFL | ARRDC4 | H4C5 |  |  | C1orf68 |  |
| IL6R | H3C8 | BHLHA15 | UCN2 |  |  | SCHIP1 |  |
| VASH1 | LCE1E | PPP1R3F | PCDHB2 |  |  | CXCL3 |  |
| CORO2B | SLC6A14 | SMIM1 | CD177 |  |  | TNF |  |
| NEU1 | BCL2A1 | AMTN | H2AC6 |  |  | LTB |  |
| C15orf62 | LYPD1 | CAPN8 | SLC16A13 |  |  | NFKBIZ |  |
| STON1 | CNNM1 | ZDHHC11 | PLEKHA7 |  |  | TRPV3 |  |
| PCDHGC5 | MYH15 | IFNE | H2AC13 |  |  | CXCL2 |  |
| H1-3 | TUBB2B | CDRT1 | SLC9A2 |  |  | NFKBIA |  |
| H2BC18 | S100A4 | COL11A2 | FAM72D |  |  | IL24 |  |
| AOC3 | BLACAT1 | LGALS7 | CPA4 |  |  | ICAM1 |  |
| FOXL1 | AK8 | TG | RDH16 |  |  | IL6 |  |
| P2RX6 | H2BC6 | SPATA25 | TFRC |  |  | CSF2 |  |
| PDGFD | SPTB | ANXA10 | GGT6 |  |  |  |  |
| KIT | BEX1 | TREM2 | DUSP10 |  |  |  |  |
| MYCT1 | ABHD12B | CLEC7A | TXNIP |  |  |  |  |
| SLC29A3 | H2AC11 | CAMK2A | IL6 |  |  |  |  |
| OLR1 | EIF4E3 | APOD | MMP12 |  |  |  |  |
| TRIM63 | COX6B2 | PATL2 | H2BC12 |  |  |  |  |
| FPGT-TNNI3K | KIAA1614 | USH1G | BLNK |  |  |  |  |
| CLCN7 | SLC7A7 | MYL5 | PSG9 |  |  |  |  |
| TNFAIP8L1 | PLPP3 | WFDC2 | C1S |  |  |  |  |
| PODXL | SPANXB1 | SLC47A2 | CALML5 |  |  |  |  |
| PER2 | PSG6 | RSAD2 | MMP3 |  |  |  |  |
| POM121L2 | NDRG4 | CLDN1 | ABCA10 |  |  |  |  |
| IL36G | PLEKHF1 | TNFRSF6B | NLRC5 |  |  |  |  |
| PER3 | ELAPOR1 | ATP8B3 | SPNS2 |  |  |  |  |
| PSG1 | BORCS7-ASMT | TMEM107 | DOK3 |  |  |  |  |
| GREM1 | PFKFB4 | CLTRN | ANK1 |  |  |  |  |
| H2AC19 | SCNN1G | PARD3B | SYT11 |  |  |  |  |
| NATD1 | KPRP | TTLL10 | CD70 |  |  |  |  |
| NR4A3 | TIMP4 | ZBTB32 | MAFB |  |  |  |  |
| SLC23A3 | RELN | AMIGO2 | H2BC8 |  |  |  |  |
| SPAG4 | TCN2 | PDCD6-AHRR | GJC2 |  |  |  |  |
| GBP4 | GJA5 | TNS2 | SLC1A3 |  |  |  |  |
| TMEM265 | NPTXR |  | LURAP1L |  |  |  |  |
| TEF | CYP1B1 |  | ALPG |  |  |  |  |
| NWD2 | ROS1 |  | DNAH3 |  |  |  |  |
| THSD7B | H2BC17 |  | SLC6A9 |  |  |  |  |
| PROC | ESM1 |  | SYT14 |  |  |  |  |
| CCR4 | novel protein |  | CRYL1 |  |  |  |  |
| DNAJC6 |  |  | MYO1G |  |  |  |  |
| CEP57L1 |  |  | CCN3 |  |  |  |  |
| STX3 |  |  | ANKRD1 |  |  |  |  |
| AP5Z1 |  |  | TNFSF9 |  |  |  |  |
| RLN2 |  |  | MAP1LC3B2 |  |  |  |  |
| ACRV1 |  |  | SPTBN4 |  |  |  |  |
| PPP1R15A |  |  | FAM72C |  |  |  |  |
| CITED2 |  |  | CSF1R |  |  |  |  |
| KRT9 |  |  | NRK |  |  |  |  |
| SEMA5B |  |  | FBXO32 |  |  |  |  |
| ECM2 |  |  | HAP1 |  |  |  |  |
| CENPE |  |  | C1orf68 |  |  |  |  |
| FLCN |  |  | ELAVL3 |  |  |  |  |
| TLN2 |  |  | KRT75 |  |  |  |  |
| CTNS |  |  | H1-2 |  |  |  |  |
| ACP5 |  |  | IGFL1 |  |  |  |  |
| CDH16 |  |  |  |  |  |  |  |
| CYGB |  |  |  |  |  |  |  |
| IL1R2 |  |  |  |  |  |  |  |
| RNASE7 |  |  |  |  |  |  |  |
| DDIT3 |  |  |  |  |  |  |  |
| OSR1 |  |  |  |  |  |  |  |
| ZNF878 |  |  |  |  |  |  |  |
| SORCS3 |  |  |  |  |  |  |  |
| PRODH |  |  |  |  |  |  |  |
| CTSE |  |  |  |  |  |  |  |
| RDH12 |  |  |  |  |  |  |  |
| SP140 |  |  |  |  |  |  |  |
| H3C2 |  |  |  |  |  |  |  |
| RAB3IL1 |  |  |  |  |  |  |  |
| HYAL4 |  |  |  |  |  |  |  |
| WNT2B |  |  |  |  |  |  |  |
| PAX8 |  |  |  |  |  |  |  |
| SERHL2 |  |  |  |  |  |  |  |
| SEMA4G |  |  |  |  |  |  |  |
| SLAMF7 |  |  |  |  |  |  |  |
| SEC14L2 |  |  |  |  |  |  |  |
| NKX1-2 |  |  |  |  |  |  |  |
| ADAP2 |  |  |  |  |  |  |  |
| ANGPTL2 |  |  |  |  |  |  |  |
| KLF15 |  |  |  |  |  |  |  |
| HMMR |  |  |  |  |  |  |  |
| ADM |  |  |  |  |  |  |  |
| PDLIM3 |  |  |  |  |  |  |  |
| FOSB |  |  |  |  |  |  |  |
| NEURL1B |  |  |  |  |  |  |  |
| DEFB103B |  |  |  |  |  |  |  |
| GOLGA8R |  |  |  |  |  |  |  |
| CRYBB2 |  |  |  |  |  |  |  |
| ODF3B |  |  |  |  |  |  |  |
| DNER |  |  |  |  |  |  |  |
| IFITM1 |  |  |  |  |  |  |  |
| TMTC1 |  |  |  |  |  |  |  |
| CALHM2 |  |  |  |  |  |  |  |
| DEPDC4 |  |  |  |  |  |  |  |
| SCG5 |  |  |  |  |  |  |  |
| SH2D5 |  |  |  |  |  |  |  |
| FAM222A |  |  |  |  |  |  |  |
| LRTM2 |  |  |  |  |  |  |  |
| FOLR3 |  |  |  |  |  |  |  |
| AS3MT |  |  |  |  |  |  |  |
| ABCA13 |  |  |  |  |  |  |  |
| RDM1 |  |  |  |  |  |  |  |
| KLHL24 |  |  |  |  |  |  |  |
| CSF2 |  |  |  |  |  |  |  |
| CRCT1 |  |  |  |  |  |  |  |
|  |  |  |  |  |  |  |  |

Supplemental Table 4: List of overlapping genes between bacterial supernatant exposures in each cervicovaginal cell line.

| Ectocervical Cells | Endocervical Cells | Vaginal Cells |
| --- | --- | --- |
| LC sups/ GV sups  n=13 | LC sups/ GV sups  n=102 | LC sups/ GV sups  n=48 |
| CDH16 | PSTPIP1 | CAPN8 |
| SPNS2 | KPNA7 | SRCIN1 |
| SPRR2D | PLAU | ADRA2C |
| EVA1B | SLC28A3 | BLNK |
| SYS1-DBNDD2 | IRF1 | PSG9 |
| FAAH | BBC3 | ZDHHC11 |
| NDRG4 | TRIM22 | AKR1B10 |
| ELAPOR1 | CMPK2 | TGM2 |
| IL36G | TGM2 | TAS2R4 |
| IFITM1 | SQSTM1 | MACROD1 |
| TMTC1 | IFNL1 | PIGA |
| RUNDC3A | STARD5 | GFPT2 |
| Novel protein | UBA7 | DNAJC15 |
|  | CSF1 | NCAM2 |
|  | QPRT | LRRC38 |
|  | ASS1 | GRIK5 |
|  | ADAM23 | RASAL1 |
|  | FRA10AC1 | SHBG |
|  | REC8 | TENT5C |
|  | KLHDC7B | RYR2 |
|  | TAP1 | PSG4 |
|  | NACAD | LIPH |
|  | STX19 | CD70 |
|  | CXCL11 | ALPP |
|  | CXCL8 | RASSF4 |
|  | HDAC9 | PLPP3 |
|  | SHFL | ANKRD22 |
|  | SCHIP1 | PSG6 |
|  | TMEM140 | PCDHB2 |
|  | OAS1 | CYP7B1 |
|  | TNF | PTGS2 |
|  | IRF7 | ITPR1 |
|  | SAMD9L | PLEKHA7 |
|  | NFKBIZ | CLDN1 |
|  | HELZ2 | ABHD14A-ACY1 |
|  | ETV7 | CTAGE4 |
|  | RASSF10 | ANKRD1 |
|  | XAF1 | MAP1LC3B2 |
|  | PTGS2 | PTCH1 |
|  | HOXA5 | ASIC3 |
|  | TPGS1 | PRRT2 |
|  | PPP2R2C | FBXO32 |
|  | WNK4 | DEPP1 |
|  | NEURL3 | PCYT1B |
|  | USP18 | IL6 |
|  | CPA4 | ROS1 |
|  | TRANK1 | C1orf68 |
|  | IL36G |  |
|  | H2AC19 |  |
|  | KRT34 |  |
|  | THEMIS2 |  |
|  | POU2F2 |  |
|  | INSYN1 |  |
|  | TNFAIP3 |  |
|  | GBP4 |  |
|  | IL6 |  |
|  | TMEM265 |  |
|  | PRDM1 |  |
|  | MX2 |  |
|  | ARHGAP31 |  |
|  | DUSP19 |  |
|  | HLA-F |  |
|  | C1S |  |
|  | CDRT1 |  |
|  | CENPE |  |
|  | DAB2 |  |
|  | IRAK2 |  |
|  | FYB1 |  |
|  | KRT4 |  |
|  | CXCL2 |  |
|  | IL1R2 |  |
|  | TMC5 |  |
|  | SPRR2A |  |
|  | CXCL1 |  |
|  | ANKK1 |  |
|  | GPR146 |  |
|  | HSH2D |  |
|  | WFDC2 |  |
|  | CD70 |  |
|  | SAA1 |  |
|  | OLFML2B |  |
|  | IFI35 |  |
|  | CXCL10 |  |
|  | RSAD2 |  |
|  | MX1 |  |
|  | IL32 |  |
|  | NRCAM |  |
|  | CFB |  |
|  | SAA2 |  |
|  | GBP5 |  |
|  | ODF3B |  |
|  | TLR2 |  |
|  | IFITM1 |  |
|  | COL27A1 |  |
|  | SPRR2E |  |
|  | TNS2 |  |
|  | TYMP |  |
|  | FOLR3 |  |
|  | C1orf68 |  |
|  | CSF2 |  |
|  | CHKB-CPT1B |  |
|  | PLXNA3 |  |

Supplemental Table 5: List of overlapping genes with divergent regulation in ectocervical cells exposed to *G. vaginalis* or *L. crispatus* culture supernatant

| Gene | log2FoldChange | | | Function |
| --- | --- | --- | --- | --- |
|  | LC Sups | GV Sups | |  |
| **Ectocervical Cells** | | | | |
| ELAPOR1 | 1.042 | | -1.119 | induced by estrogen, important for cellular response to stress, protects cells from cell death by inducing cytosolic vacuolization |
| **Endocervical Cells** | | | | |
| CPA4 | 1.699 | | -1.368 | Metalloprotease that cleaves hydrophobic C-terminal residues, involved in the histone hyperacetylation pathway |
| TMEM265 | 1.341 | | -4.953 | integral component of membrane, transcription coactivator activity and histone acetyltransferase activity |
| KRT4 | 1.208 | | -1.627 | type II cytokeratin is specifically expressed in differentiated layers of the mucosal and esophageal epithelia, involved in keratinization |
| **Vaginal Cells** | | | | |
| CPN8 | 1.563 | | -1.190 | calcium-dependent phospholipid-binding protein that may play a role in calcium-mediated intracellular processes |
| ADRA2C | -1.203 | | 1.274 | critical role in regulating neurotransmitter release from sympathetic nerves and from adrenergic neuron |
| BLNK | 1.240 | | -1.229 | regulating biological outcomes of B-cell function and development, important for the activation of NF-kappa-B, orchestrating the pro-B cell to pre-B cell transition |
| AKR1B10 | 1.806 | | -1.946 | catalyzes the NADPH-dependent reduction of a wide variety of carbonyl-containing compounds |
| LRRC38 | -1.694 | | 1.597 | positive regulation of voltage-gated potassium channel activity and potassium ion transmembrane transport. |
| ANKRD22 | 1.193 | | -1.656 | promotes glioma proliferation, migration, invasion, and epithelial-mesenchymal transition |
| PLEKHA7 | 1.468 | | -1.156 | involved in epithelial cell-cell adhesion; pore complex assembly; and zonula adherens maintenance |
| FBXO32 | 1.501 | | -1.006 | E3 ubiquitin-protein ligase complex which mediates the ubiquitination and subsequent proteasomal degradation of target proteins |
| PCYT1B | 1.202 | | -1.096 | regulation of phosphatidylcholine biosynthesis |
