# Supplementary material for: Cervicovaginal microbiome alters transcriptomic and epigenomic signatures across cervicovaginal epithelial barriers
Source: Research Square preprint supplement (doi:10.21203/rs.3.rs-6171614/v1), 2025-05-07
Supplement: Supplementary file 3 [file 49e41d11078fd1555ccfeb83.docx]

**Supplemental Figure 1:** Cell death in anti-microbial peptide samples after 24 hour exposure to 1% bacteria free supernatants from *L. crispatus* or *G. vaginalis* in ectocervical, endocervical and vaginal epithelial cells. NYCIII (NYC) media without bacteria acted as controls. Values are mean ± SEM. Asterisks over solid lines represent comparisons between treatment groups. *p<0.05, **p<0.01

**Supplementary Figure 2:** Mapping (number and percentage) of reads for each cell type. hg38 = mapped to the human reference genome and used for downstream analysis. Duplicates = removed for the same exact DNA fragment. rCRSd = mitochondrial genome per revised Cambridge Reference Sequence doubled genome. QC filtered = poor quality reads that were removed (MAPQ score <10).


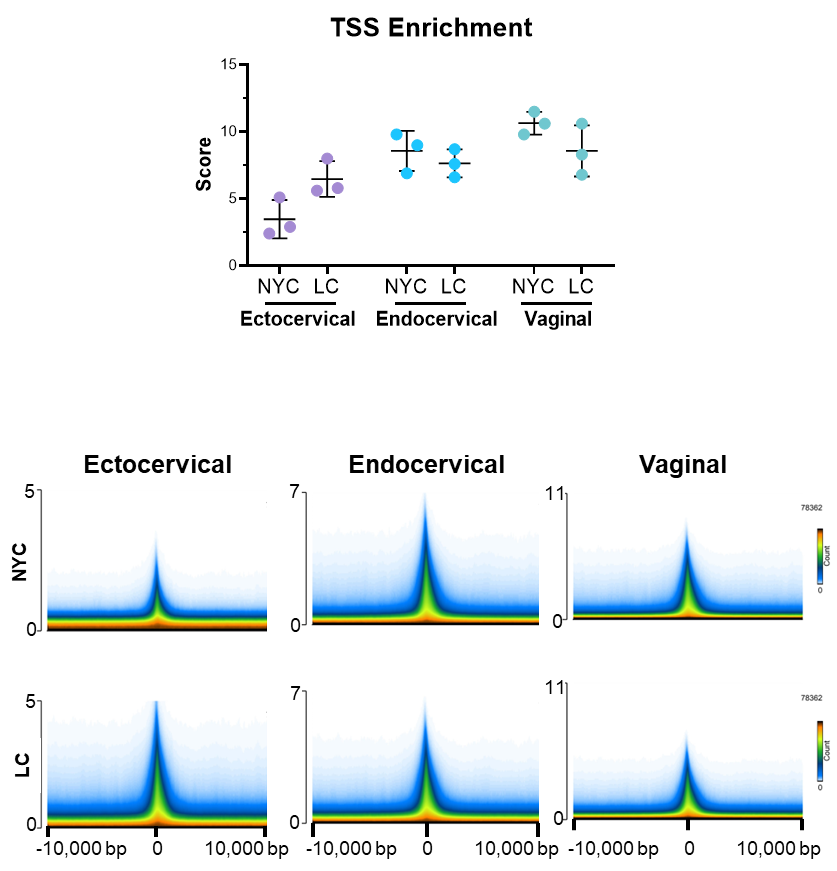


**Supplementary Figure 3:** Enrichment of reads around the TSS. Top: Graph of TSS enrichment score for each biological replicate. Bottom: Density of counts around the TSS for each condition by cell types.

**
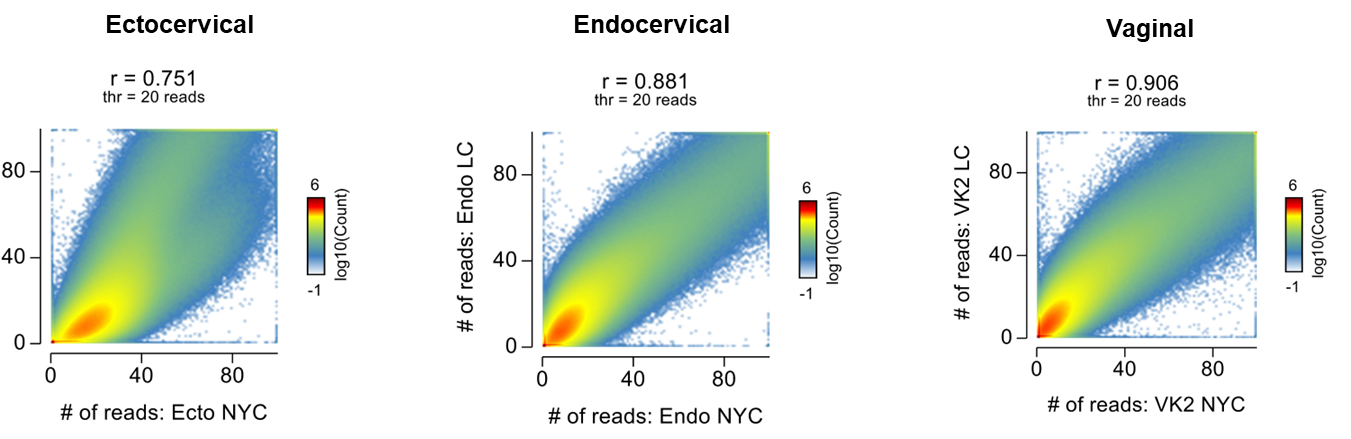
Supplementary Figure 4:** Correlation between treatment conditions of read counts (not normalized)

**
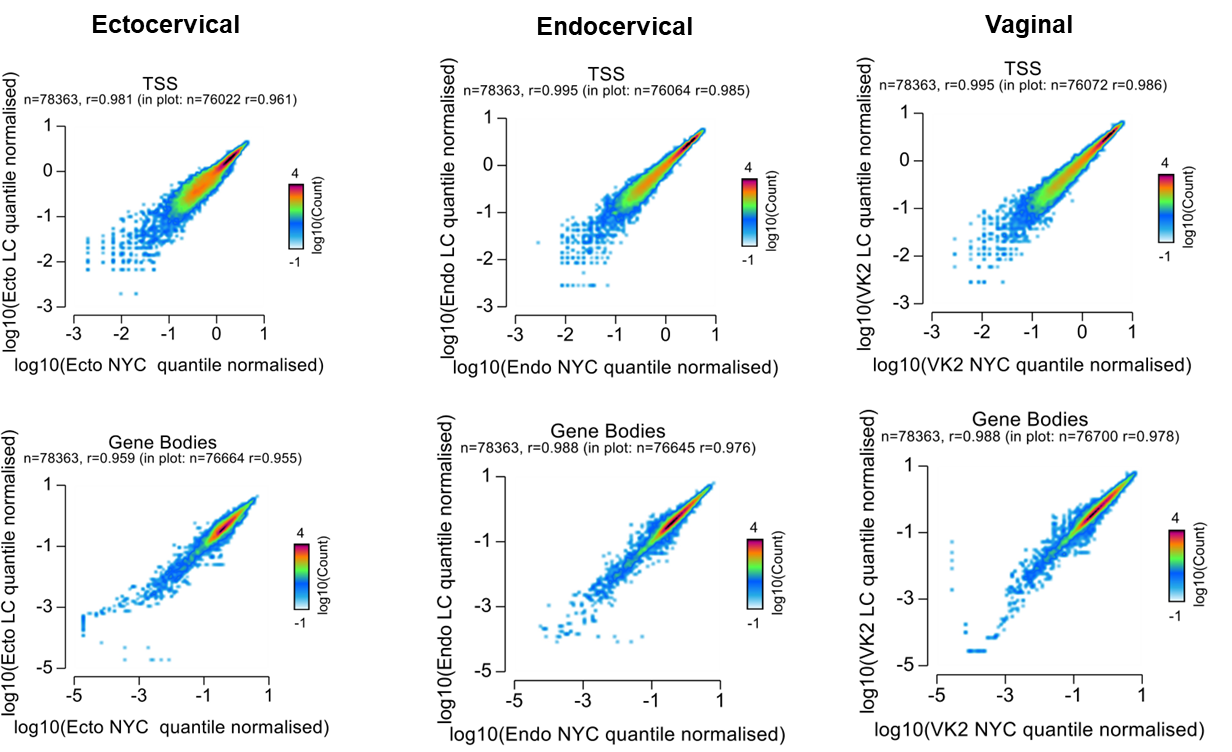
**

**Supplementary Figure 5:** Correlation of normalized read counts between conditions at TSS or within the gene bodies


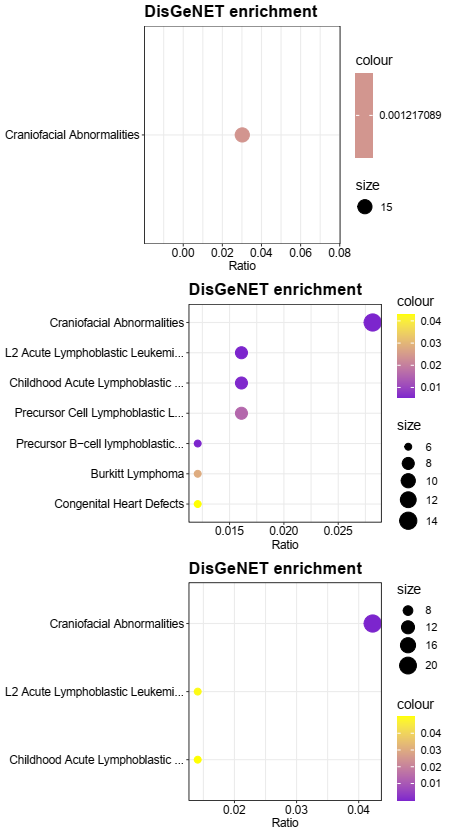


FDR

FDR

FDR

**Supplementary Figure 6:** Random DisGeNET enrichment bubble charts for random motif lists that were generated.


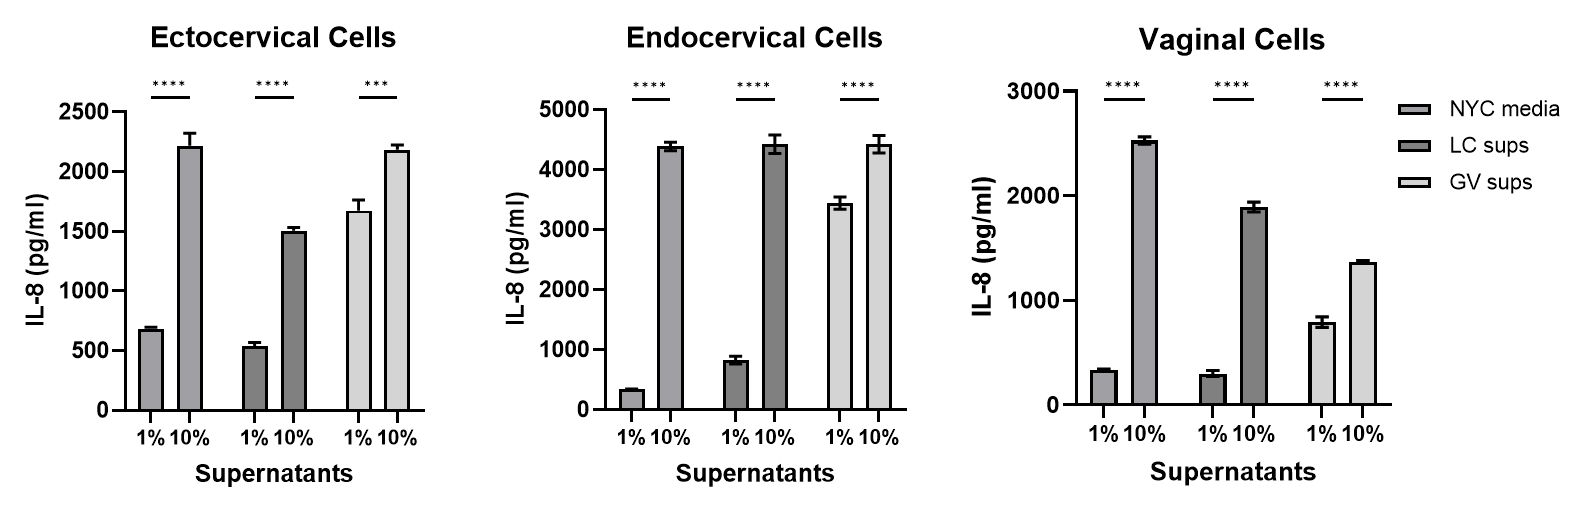


**Supplementary Figure 7:** Dose response of bacteria-free supernatants from L. crispatus (LC) or G. vaginalis (GV) cultures in ectocervical, endocervical or vaginal epithelial cells. Bacteria-free supernatants were diluted to either 1% (v/v) or 10% (v/v) in keratinocyte serum free media (KSFM). NYCIII media without bacteria diluted in KSMF was used as the control. IL-8 was utilized as a general marker of detectable inflammation and was measured by ELISA. Values are mean ± SEM. Asterisks over solid lines represent comparisons between treatment groups. ***p<0.001, ****p<0.0001

**Supplemental Figure 8:** Cell death in RNA sequencing samples after 24 hour exposure to 1% bacteria free supernatants from *L. crispatus* or *G. vaginalis* in ectocervical, endocervical and vaginal epithelial cells. Non-treated (NT) cells or NYCIII (NYC) media without bacteria acted as controls. Values are mean ± SEM. Asterisks over solid lines represent comparisons between treatment groups. *p<0.05, **p<0.01, ***p<0.001
