# Supplementary material for: Cervicovaginal microbiome alters transcriptomic and epigenomic signatures across cervicovaginal epithelial barriers
Source: Research Square preprint supplement (doi:10.21203/rs.3.rs-6171614/v1), 2025-05-07
Supplement: Supplementary file 4 [file 4a762d2150cb125627098879.xlsx]

## Sheet: Sheet1
RANK	DB	ID	ALT_ID	CONSENSUS	TP	TP%	FP	FP%	ENR_RATIO	SCORE_THR	PVALUE	LOG_PVALUE	EVALUE	LOG_EVALUE	QVALUE	LOG_QVALUE
1	motif_db/CIS-BP_2.00/Homo_sapiens.meme	M07609_2.00	ZNF496	ATYRYGCCACTGCACTCCAGCCTGGGCRAC	888	12.14	0	0	889	16	1.69e-280	-644.2	1.8e-277	-637.23	8.85e-278	-637.94
2	motif_db/CIS-BP_2.00/Homo_sapiens.meme	M07659_2.00	ZNF443	GTCTKCYMAGWHGCTGGYRTT	860	11.76	11	0.15	71.7	15	1.4e-249	-573	1.49e-246	-566.03	3.68e-247	-567.44
3	motif_db/CIS-BP_2.00/Homo_sapiens.meme	M07730_2.00	ZNF181	MYYYSWGSTTSTWGGRMKGMKGWS	883	12.07	20	0.27	42.1	15	1.09e-243	-559.44	1.16e-240	-552.47	1.9e-241	-554.28
4	motif_db/CIS-BP_2.00/Homo_sapiens.meme	M08260_2.00	ZNF467	YCYCYCYCCCYBCCCCTCCCC	3154	43.13	1517	20.74	2.08	8.1	2.43e-188	-432	2.59e-185	-425.03	3.19e-186	-427.12
5	motif_db/CIS-BP_2.00/Homo_sapiens.meme	M08388_2.00	ZNF770	YCYCRGCCTCC	1196	16.35	205	2.8	5.81	13	9.37e-187	-428.35	9.98e-184	-421.37	9.83e-185	-423.69
6	motif_db/CIS-BP_2.00/Homo_sapiens.meme	M07658_2.00	ZNF571	CCGCCGCVGCCKCCS	802	10.97	79	1.08	10	14	5.25e-160	-366.76	5.59e-157	-359.78	4.59e-158	-362.28
7	motif_db/CIS-BP_2.00/Homo_sapiens.meme	M07605_2.00	ZNF235	THWTHYWTTWHATYTTTTTYTTTWTTTTTT	3832	52.4	2273	31.08	1.69	8	4.73e-152	-348.44	5.04e-149	-341.47	3.54e-150	-344.12
8	motif_db/CIS-BP_2.00/Homo_sapiens.meme	M08373_2.00	ZNF774	NYCYCHKBCTCYTCYTCY	1702	23.27	596	8.15	2.85	11	2.33e-144	-330.73	2.48e-141	-323.76	1.53e-142	-326.54
9	motif_db/CIS-BP_2.00/Homo_sapiens.meme	M08384_2.00	ZNF121	VCDGGVCMRVRYAGCVAGRCCCCN	690	9.44	78	1.07	8.75	15	1.75e-129	-296.47	1.87e-126	-289.5	1.02e-127	-292.41
10	motif_db/CIS-BP_2.00/Homo_sapiens.meme	M07590_2.00	ZNF287	TYTYTBTYTTYYWTBTYTKTTWTTTTTTYTTTT	653	8.93	79	1.08	8.17	15	1.01e-118	-271.69	1.08e-115	-264.72	5.31e-117	-267.73
11	motif_db/CIS-BP_2.00/Homo_sapiens.meme	M07773_2.00	ZNF432	TTYCYCYCCCYYBCCBYCYCCHTYCCTCTC	3887	53.15	2524	34.51	1.54	5.5	4.67e-115	-263.26	4.97e-112	-256.29	2.22e-113	-259.39
12	motif_db/CIS-BP_2.00/Homo_sapiens.meme	M07782_2.00	ZNF487	CMAAWAAAAAWRAAAWAAHAAGCAVAVMA	1047	14.32	283	3.87	3.69	10	4.39e-113	-258.71	4.68e-110	-251.74	1.92e-111	-254.94
13	motif_db/CIS-BP_2.00/Homo_sapiens.meme	M07610_2.00	PRDM9	SYTBYTDYBNCCYCCSTNVCCNCC	3751	51.29	2414	33.01	1.55	6.5	7.58e-112	-255.86	8.07e-109	-248.89	3.06e-110	-252.17
14	motif_db/CIS-BP_2.00/Homo_sapiens.meme	M07764_2.00	ZNF880	CTGCWCTCTCCCYYYCCCMHYYHNCHN	2924	39.98	1679	22.96	1.74	8	5.25e-110	-251.63	5.59e-107	-244.66	1.96e-108	-248
15	motif_db/CIS-BP_2.00/Homo_sapiens.meme	M07642_2.00	ZNF519	CSGCBGCMGCCGCCC	2424	33.15	1356	18.54	1.79	7	1.46e-91	-209.15	1.56e-88	-202.18	5.12e-90	-205.6
16	motif_db/CIS-BP_2.00/Homo_sapiens.meme	M07776_2.00	ZNF225	TTACCWKTTDRATTYYTTTYTTTTTYYT	2104	28.77	1142	15.62	1.84	7.5	9.09e-83	-188.91	9.68e-80	-181.94	2.98e-81	-185.42
17	motif_db/CIS-BP_2.00/Homo_sapiens.meme	M08339_2.00	ZNF524	CTCGAACCCNKGMCC	912	12.47	288	3.94	3.16	11	1.81e-82	-188.22	1.93e-79	-181.25	5.58e-81	-184.79
18	motif_db/CIS-BP_2.00/Homo_sapiens.meme	M08340_2.00	ZBTB26	CGCGCRCRCGCRCGCRCRCRC	643	8.79	142	1.94	4.5	11	3.98e-81	-185.13	4.24e-78	-178.16	1.16e-79	-181.76
19	motif_db/CIS-BP_2.00/Homo_sapiens.meme	M08310_2.00	ZNF341	GCTSTTCCYBCYBCYSYCCBS	3219	44.02	2115	28.92	1.52	7.9	8.64e-81	-184.35	9.2e-78	-177.38	2.38e-79	-181.04
20	motif_db/CIS-BP_2.00/Homo_sapiens.meme	M08377_2.00	ZSCAN16	RTRTRTRTATRTRTRTATATATAT	656	8.97	150	2.05	4.35	12	1.67e-80	-183.69	1.78e-77	-176.72	4.38e-79	-180.43
21	motif_db/CIS-BP_2.00/Homo_sapiens.meme	M07678_2.00	ZNF529	YYNSSYHCYTCVTCCCSCTYCCCMCSC	4420	60.44	3282	44.88	1.35	2.2	1.04e-79	-181.87	1.11e-76	-174.9	2.59e-78	-178.65
22	motif_db/CIS-BP_2.00/Homo_sapiens.meme	M08261_2.00	ZSCAN22	CCTCCTCCMTCWGAC	1772	24.23	897	12.27	1.97	9.4	1.36e-79	-181.6	1.45e-76	-174.63	3.24e-78	-178.43
23	motif_db/CIS-BP_2.00/Homo_sapiens.meme	M08323_2.00	KLF15	CCCCNSCYCCGCCCC	2395	32.75	1406	19.23	1.7	8.6	2.04e-78	-178.89	2.17e-75	-171.92	4.65e-77	-175.76
24	motif_db/CIS-BP_2.00/Homo_sapiens.meme	M07689_2.00	ZNF383	RCCCAGGCYCCTTCCMYCTTGTKGCTC	3521	48.15	2428	33.2	1.45	4.4	4.36e-76	-173.52	4.64e-73	-166.55	9.52e-75	-170.44
25	motif_db/CIS-BP_2.00/Homo_sapiens.meme	M08277_2.00	PRDM6	TTTTYYTBTTTTTTYHYTTYY	1030	14.08	384	5.25	2.68	12	1.55e-75	-172.26	1.65e-72	-165.28	3.25e-74	-169.21
26	motif_db/CIS-BP_2.00/Homo_sapiens.meme	M08342_2.00	ZNF596	KCTCKGBCTCYYYCY	2913	39.83	1878	25.68	1.55	7.9	7.04e-75	-170.74	7.5e-72	-163.77	1.42e-73	-167.74
27	motif_db/CIS-BP_2.00/Homo_sapiens.meme	M07647_2.00	ZNF135	TCGACCTCC	403	5.51	46	0.63	8.6	14	1.47e-74	-170.01	1.57e-71	-163.03	2.86e-73	-167.04
28	motif_db/CIS-BP_2.00/Homo_sapiens.meme	M04529_2.00	ZNF444	NCGTCCCCCTCCCCCH	2142	29.29	1233	16.86	1.74	6.1	5.17e-72	-164.14	5.51e-69	-157.17	9.69e-71	-161.21
29	motif_db/CIS-BP_2.00/Homo_sapiens.meme	M08296_2.00	SP4	YHRGCYCCGCCCCCY	1475	20.17	718	9.82	2.05	10	3.96e-70	-159.8	4.22e-67	-152.83	7.16e-69	-156.91
30	motif_db/CIS-BP_2.00/Homo_sapiens.meme	M07614_2.00	ZNF180	CCSCASBCCCCDCCCSBCCCY	3760	51.42	2711	37.07	1.39	4.8	1.03e-68	-156.55	1.1e-65	-149.57	1.8e-67	-153.68
31	motif_db/CIS-BP_2.00/Homo_sapiens.meme	M07720_2.00	ZNF785	TSTGTGTKTGKGBRTSTGTRTGTVYVWGT	288	3.94	15	0.21	18.1	16	4.33e-68	-155.11	4.62e-65	-148.14	7.33e-67	-152.28
32	motif_db/CIS-BP_2.00/Homo_sapiens.meme	M07662_2.00	HKR1	VYBVYSTCCTCCCYNGYSCMB	3190	43.62	2182	29.84	1.46	7.8	1.93e-67	-153.61	2.06e-64	-146.64	3.17e-66	-150.82
33	motif_db/CIS-BP_2.00/Homo_sapiens.meme	M07927_2.00	EGR1	CCSCBCYBCCGCCCMCGCVS	3693	50.5	2691	36.8	1.37	4.6	4.89e-63	-143.48	5.21e-60	-136.51	7.77e-62	-140.71
34	motif_db/CIS-BP_2.00/Homo_sapiens.meme	M05607_2.00	RARA	RRGGTCANRRGGTCAN	358	4.9	47	0.64	7.48	14	3.99e-62	-141.38	4.25e-59	-134.4	6.16e-61	-138.64
35	motif_db/CIS-BP_2.00/Homo_sapiens.meme	M07587_2.00	ZNF304	CCCCCKCCCCRVTCSRGCCYYSNS	4839	66.17	3860	52.78	1.25	3.4	1.79e-61	-139.88	1.9e-58	-132.91	2.68e-60	-137.17
36	motif_db/CIS-BP_2.00/Homo_sapiens.meme	M08395_2.00	ZNF260	GCYBYNTHSYHYTCC	886	12.12	342	4.68	2.59	11	4.21e-61	-139.02	4.48e-58	-132.05	6.13e-60	-136.34
37	motif_db/CIS-BP_2.00/Homo_sapiens.meme	M08325_2.00	ZNF22	TTTTTTTTT	2570	35.14	1670	22.84	1.54	8.7	5.74e-61	-138.71	6.12e-58	-131.74	8.14e-60	-136.06
38	motif_db/CIS-BP_2.00/Homo_sapiens.meme	M08096_2.00	SP1	GCCCCKCCCCY	3427	46.86	2466	33.72	1.39	7.8	2.07e-59	-135.12	2.21e-56	-128.15	2.86e-58	-132.5
39	motif_db/CIS-BP_2.00/Homo_sapiens.meme	M07733_2.00	ZNF823	YYYTTCTCTBTYKCY	1072	14.66	490	6.7	2.19	11	5.25e-56	-127.29	5.6e-53	-120.32	7.06e-55	-124.69
40	motif_db/CIS-BP_2.00/Homo_sapiens.meme	M05022_2.00	OTX1	NTAATCCB	1319	18.04	675	9.23	1.95	11	2.88e-55	-125.58	3.07e-52	-118.61	3.77e-54	-123.01
41	motif_db/CIS-BP_2.00/Homo_sapiens.meme	M04637_2.00	ZNF580	CCTACCCTYDCCTACCCY	5422	74.14	4558	62.33	1.19	4.5	1.5e-53	-121.63	1.6e-50	-114.66	1.92e-52	-119.08
42	motif_db/CIS-BP_2.00/Homo_sapiens.meme	M08299_2.00	KLF12	CCNGGCCMCGCCCCB	1551	21.21	870	11.9	1.78	9.2	1.41e-52	-119.39	1.51e-49	-112.42	1.77e-51	-116.86
43	motif_db/CIS-BP_2.00/Homo_sapiens.meme	M07684_2.00	ZNF197	YYTBYTYYTGWCYTT	5636	77.07	4806	65.72	1.17	6.6	1.61e-52	-119.26	1.72e-49	-112.29	1.96e-51	-116.76
44	motif_db/CIS-BP_2.00/Homo_sapiens.meme	M08329_2.00	ZNF146	GCTGYRTARTATTCC	226	3.09	13	0.18	16.2	15	2.39e-52	-118.86	2.54e-49	-111.89	2.85e-51	-116.39
45	motif_db/CIS-BP_2.00/Homo_sapiens.meme	M08321_2.00	ZNF281	BBCCCCTCCCCC	2172	29.7	1387	18.97	1.57	8.3	3.45e-52	-118.5	3.67e-49	-111.53	4.02e-51	-116.04
46	motif_db/CIS-BP_2.00/Homo_sapiens.meme	M07694_2.00	ZNF527	TYTCTGTYKCTKRCMMCCHNN	2490	34.05	1671	22.85	1.49	8.4	2.38e-51	-116.56	2.54e-48	-109.59	2.72e-50	-114.13
47	motif_db/CIS-BP_2.00/Homo_sapiens.meme	M07680_2.00	ZNF749	AACCCCAAC	2067	28.26	1309	17.9	1.58	9.4	1.53e-50	-114.71	1.62e-47	-107.74	1.7e-49	-112.29
48	motif_db/CIS-BP_2.00/Homo_sapiens.meme	M07712_2.00	ZNF418	RMHWTTTWWTMWTNWAADAAAANWWTTVCW	4662	63.75	3779	51.68	1.23	5.1	9.46e-50	-112.88	1.01e-46	-105.91	1.03e-48	-110.49
49	motif_db/CIS-BP_2.00/Homo_sapiens.meme	M08287_2.00	PATZ1	CCCCDCCC	1484	20.29	835	11.42	1.78	10	1.49e-49	-112.43	1.59e-46	-105.46	1.59e-48	-110.06
50	motif_db/CIS-BP_2.00/Homo_sapiens.meme	M07977_2.00	HSF1	GTCSYGGGTTCGAWTCCC	777	10.62	316	4.32	2.45	9	4.63e-49	-111.29	4.93e-46	-104.32	4.86e-48	-108.94
51	motif_db/CIS-BP_2.00/Homo_sapiens.meme	M02665_2.00	RREB1	CCCCMAAMCAMCCMCMMMCV	1717	23.48	1029	14.07	1.67	7.4	1.21e-48	-110.33	1.29e-45	-103.36	1.24e-47	-108
52	motif_db/CIS-BP_2.00/Homo_sapiens.meme	M04997_2.00	PITX3	HTAATCCM	1520	20.78	871	11.91	1.74	10	2.32e-48	-109.68	2.47e-45	-102.71	2.34e-47	-107.37
53	motif_db/CIS-BP_2.00/Homo_sapiens.meme	M07619_2.00	ZNF283	VGSCCVGSCCASAYCAGCCNRSCC	2134	29.18	1385	18.94	1.54	7.8	5.03e-48	-108.91	5.35e-45	-101.94	4.97e-47	-106.62
54	motif_db/CIS-BP_2.00/Homo_sapiens.meme	M08100_2.00	(ZFX)_(Mus_musculus)_(DBD_0.99)	SSVGSCBVGGCCTS	359	4.91	73	1	4.86	14	5.5e-48	-108.82	5.86e-45	-101.85	5.34e-47	-106.55
55	motif_db/CIS-BP_2.00/Homo_sapiens.meme	M07671_2.00	ZNF93	DNNDSCKGBSYTGCAGCARBSNCTGCTGCTDCCHBNNBB	1851	25.31	1145	15.66	1.62	8.3	6.16e-48	-108.71	6.56e-45	-101.74	5.87e-47	-106.45
56	motif_db/CIS-BP_2.00/Homo_sapiens.meme	M08290_2.00	MAZ	SCCCCKCCC	2068	28.28	1332	18.21	1.55	9.3	1.61e-47	-107.74	1.72e-44	-100.77	1.51e-46	-105.51
57	motif_db/CIS-BP_2.00/Homo_sapiens.meme	M07588_2.00	ZNF132	TCCTTCCCHCYBTCC	3833	52.41	2965	40.54	1.29	7	2.95e-47	-107.14	3.14e-44	-100.17	2.72e-46	-104.92
58	motif_db/CIS-BP_2.00/Homo_sapiens.meme	M07754_2.00	ZNF468	CRCCCCCTCCCH	2079	28.43	1349	18.45	1.54	8.4	1.62e-46	-105.44	1.73e-43	-98.46	1.47e-45	-103.23
59	motif_db/CIS-BP_2.00/Homo_sapiens.meme	M05383_2.00	DMBX1	NTAATCCB	1500	20.51	869	11.88	1.73	9.5	3.91e-46	-104.56	4.16e-43	-97.59	3.47e-45	-102.37
60	motif_db/CIS-BP_2.00/Homo_sapiens.meme	M02394_2.00	NR2E1	HGAGGTCARN	745	10.19	307	4.2	2.42	12	5.74e-46	-104.17	6.11e-43	-97.2	5.02e-45	-102
61	motif_db/CIS-BP_2.00/Homo_sapiens.meme	M07717_2.00	ZNF441	RRCTCCGCCYCC	432	5.91	117	1.6	3.67	14	3.01e-45	-102.51	3.2e-42	-95.54	2.59e-44	-100.36
62	motif_db/CIS-BP_2.00/Homo_sapiens.meme	M04455_2.00	KLF2	NRCCACRCCCH	1185	16.2	629	8.6	1.88	10	5.78e-45	-101.86	6.16e-42	-94.89	4.89e-44	-99.73
63	motif_db/CIS-BP_2.00/Homo_sapiens.meme	M08341_2.00	ZNF554	CWGRGYCABBTRGGKKRCTRN	2559	34.99	1785	24.41	1.43	8.2	6.21e-45	-101.79	6.61e-42	-94.82	5.17e-44	-99.67
64	motif_db/CIS-BP_2.00/Homo_sapiens.meme	M07592_2.00	ZFP14	CVYTCCDGDGCCTCC	2444	33.42	1682	23	1.45	8.6	6.49e-45	-101.75	6.91e-42	-94.78	5.32e-44	-99.64
65	motif_db/CIS-BP_2.00/Homo_sapiens.meme	M00310_2.00	PITX2	TTAATCCH	1696	23.19	1050	14.36	1.61	9.9	4.44e-43	-97.52	4.73e-40	-90.55	3.58e-42	-95.43
66	motif_db/CIS-BP_2.00/Homo_sapiens.meme	M05134_2.00	GSC	HTAATCCS	1577	21.56	962	13.15	1.64	9.8	1.35e-41	-94.1	1.44e-38	-87.13	1.07e-40	-92.03
67	motif_db/CIS-BP_2.00/Homo_sapiens.meme	M08246_2.00	KLF10	GCCMCRCCCH	842	11.51	395	5.4	2.13	11	3.41e-41	-93.18	3.63e-38	-86.21	2.67e-40	-91.12
68	motif_db/CIS-BP_2.00/Homo_sapiens.meme	M08293_2.00	KLF1	SCMSRGCCMCRCCCH	2399	32.8	1675	22.9	1.43	8.2	4.99e-41	-92.8	5.31e-38	-85.83	3.85e-40	-90.76
69	motif_db/CIS-BP_2.00/Homo_sapiens.meme	M07581_2.00	ZNF484	BYSCYTGTKCYBCWBTCCYYB	4429	60.56	3626	49.58	1.22	6.7	6.26e-41	-92.57	6.67e-38	-85.6	4.76e-40	-90.54
70	motif_db/CIS-BP_2.00/Homo_sapiens.meme	M07666_2.00	ZNF662	RKCTAKCCCYBKCCTACC	2803	38.33	2045	27.96	1.37	8	9.18e-41	-92.19	9.78e-38	-85.22	6.88e-40	-90.17
71	motif_db/CIS-BP_2.00/Homo_sapiens.meme	M08298_2.00	KLF7	GGCCMCGCCCH	1109	15.16	597	8.16	1.86	10	2.17e-40	-91.33	2.31e-37	-84.36	1.6e-39	-89.33
72	motif_db/CIS-BP_2.00/Homo_sapiens.meme	M07779_2.00	ZIM2	YCNTCCBCCYTCTYCTBCCVGCCTGKGGCC	3177	43.44	2405	32.89	1.32	0.5	9.81e-40	-89.82	1.05e-36	-82.85	7.15e-39	-87.83
73	motif_db/CIS-BP_2.00/Homo_sapiens.meme	M07753_2.00	ZNF805	KGYDTTCCTTGGYTTGTG	1727	23.62	1106	15.12	1.56	9.1	5.02e-39	-88.19	5.34e-36	-81.22	3.6e-38	-86.22
74	motif_db/CIS-BP_2.00/Homo_sapiens.meme	M07723_2.00	ZNF860	SBBYTGCTCCCTGCY	3832	52.4	3051	41.72	1.26	7.1	1.45e-38	-87.13	1.54e-35	-80.16	1.03e-37	-85.17
75	motif_db/CIS-BP_2.00/Homo_sapiens.meme	M05132_2.00	RHOXF2	YTAATCCH	2085	28.51	1421	19.43	1.47	9.6	3.24e-38	-86.32	3.46e-35	-79.35	2.27e-37	-84.38
76	motif_db/CIS-BP_2.00/Homo_sapiens.meme	M08086_2.00	KLF5	GCCCCDCCCH	578	7.9	228	3.12	2.53	12	4.53e-38	-85.99	4.83e-35	-79.02	3.13e-37	-84.06
77	motif_db/CIS-BP_2.00/Homo_sapiens.meme	M08009_2.00	RFX5	TCABYWGTTGCYRGG	1759	24.05	1142	15.62	1.54	9.3	6.93e-38	-85.56	7.38e-35	-78.59	4.72e-37	-83.64
78	motif_db/CIS-BP_2.00/Homo_sapiens.meme	M07621_2.00	ZNF30	CAGCCGCCCCGTCCG	3863	52.82	3093	42.29	1.25	1.4	1.68e-37	-84.68	1.79e-34	-77.71	1.13e-36	-82.77
79	motif_db/CIS-BP_2.00/Homo_sapiens.meme	M07597_2.00	ZNF182	CYTTTTKTTTTT	2396	32.76	1706	23.33	1.4	9.2	2.77e-37	-84.18	2.95e-34	-77.2	1.84e-36	-82.28
80	motif_db/CIS-BP_2.00/Homo_sapiens.meme	M07729_2.00	ZNF780A	CCHRRCYRCCTGCCWRAHCMNSCB	2156	29.48	1494	20.43	1.44	8.7	5.13e-37	-83.56	5.46e-34	-76.59	3.36e-36	-81.68
81	motif_db/CIS-BP_2.00/Homo_sapiens.meme	M08322_2.00	ZNF513	AYCATCATCAYCATC	5493	75.11	4799	65.62	1.14	1.8	1.56e-36	-82.45	1.66e-33	-75.48	1.01e-35	-80.58
82	motif_db/CIS-BP_2.00/Homo_sapiens.meme	M07573_2.00	ZNF85	AAAVTGCWGGAATCTSHD	1586	21.69	1007	13.77	1.57	9.7	1.8e-36	-82.3	1.92e-33	-75.33	1.15e-35	-80.45
83	motif_db/CIS-BP_2.00/Homo_sapiens.meme	M04527_2.00	ZNF23	DCRCCCATGGCCGCGMCMV	1179	16.12	680	9.3	1.73	7.5	9.14e-36	-80.68	9.73e-33	-73.71	5.77e-35	-78.84
84	motif_db/CIS-BP_2.00/Homo_sapiens.meme	M07660_2.00	ZNF792	CSGBGCCTABCTGVGGGCGCDGGCBTGRNG	1085	14.84	611	8.35	1.77	0.48	5.3e-35	-78.92	5.65e-32	-71.95	3.31e-34	-77.09
85	motif_db/CIS-BP_2.00/Homo_sapiens.meme	M03343_2.00	MEF2D	DCTAWAAATAGM	820	11.21	416	5.69	1.97	11	6.67e-34	-76.39	7.1e-31	-69.42	4.11e-33	-74.57
86	motif_db/CIS-BP_2.00/Homo_sapiens.meme	M07734_2.00	ZNF311	GVMGCHGCAGCNSCKGSYGCS	2450	33.5	1788	24.45	1.37	4.7	7.92e-34	-76.22	8.44e-31	-69.25	4.83e-33	-74.41
87	motif_db/CIS-BP_2.00/Homo_sapiens.meme	M07716_2.00	ZNF398	CTSYYTCCCTCCCT	1052	14.39	593	8.11	1.77	11	8.92e-34	-76.1	9.5e-31	-69.13	5.38e-33	-74.3
88	motif_db/CIS-BP_2.00/Homo_sapiens.meme	M04537_2.00	KLF13	NRCCACGCCCMCH	400	5.47	132	1.81	3.02	13	9.24e-34	-76.06	9.84e-31	-69.09	5.5e-33	-74.28
89	motif_db/CIS-BP_2.00/Homo_sapiens.meme	M07667_2.00	ZNF320	NNBCAYHKGCCCCYKGGHCCC	2770	37.88	2088	28.55	1.33	6.7	2.54e-33	-75.05	2.7e-30	-68.08	1.49e-32	-73.28
90	motif_db/CIS-BP_2.00/Homo_sapiens.meme	M07676_2.00	ZNF267	CCKCYSCACMKGCCBBCRGSN	4787	65.46	4080	55.79	1.17	4.3	2.88e-33	-74.93	3.07e-30	-67.96	1.68e-32	-73.16
91	motif_db/CIS-BP_2.00/Homo_sapiens.meme	M07715_2.00	ZNF100	CVGCCGCCGCCDTGG	3670	50.18	2951	40.35	1.24	4.4	3.78e-33	-74.66	4.03e-30	-67.69	2.18e-32	-72.9
92	motif_db/CIS-BP_2.00/Homo_sapiens.meme	M07679_2.00	ZNF284	TGCGATCWY	3133	42.84	2440	33.37	1.28	7.4	2.1e-32	-72.94	2.24e-29	-65.97	1.2e-31	-71.2
93	motif_db/CIS-BP_2.00/Homo_sapiens.meme	M08088_2.00	KLF9	NSCCACACCCACH	507	6.93	204	2.79	2.48	12	2.24e-32	-72.88	2.39e-29	-65.91	1.26e-31	-71.15
94	motif_db/CIS-BP_2.00/Homo_sapiens.meme	M07612_2.00	ZNF202	CCKCSTCC	3421	46.78	2718	37.17	1.26	7.3	2.72e-32	-72.68	2.9e-29	-65.71	1.52e-31	-70.96
95	motif_db/CIS-BP_2.00/Homo_sapiens.meme	M03082_2.00	PITX1	NHTAATCCC	2191	29.96	1570	21.47	1.4	9	3.52e-32	-72.43	3.75e-29	-65.45	1.94e-31	-70.72
96	motif_db/CIS-BP_2.00/Homo_sapiens.meme	M07727_2.00	ZNF460	CGCCRCCTCCCC	4428	60.55	3723	50.91	1.19	5	4.52e-32	-72.17	4.81e-29	-65.2	2.47e-31	-70.48
97	motif_db/CIS-BP_2.00/Homo_sapiens.meme	M07993_2.00	RXRA	WRRGGTCA	172	2.35	20	0.27	8.24	13	5.55e-32	-71.97	5.91e-29	-65	3e-31	-70.28
98	motif_db/CIS-BP_2.00/Homo_sapiens.meme	M07731_2.00	ZNF44	NTTCYCHRCAGCARBANCNNNSVSBNCBNN	3621	49.51	2918	39.9	1.24	5.3	7.67e-32	-71.65	8.17e-29	-64.67	4.1e-31	-69.97
99	motif_db/CIS-BP_2.00/Homo_sapiens.meme	M02898_2.00	SP7	RMCACGCCCMCY	1688	23.08	1132	15.48	1.49	9.3	9.78e-32	-71.4	1.04e-28	-64.43	5.18e-31	-69.74
100	motif_db/CIS-BP_2.00/Homo_sapiens.meme	M07691_2.00	ZNF548	CCTGCHGSCRCCBYGVYCYBG	5548	75.86	4916	67.22	1.13	3.1	2.59e-31	-70.43	2.76e-28	-63.46	1.36e-30	-68.77
101	motif_db/CIS-BP_2.00/Homo_sapiens.meme	M08066_2.00	CREB1	NVTGACGTCABN	2360	32.27	1732	23.68	1.36	7.4	3.03e-31	-70.27	3.23e-28	-63.3	1.58e-30	-68.62
102	motif_db/CIS-BP_2.00/Homo_sapiens.meme	M04400_2.00	KLF6	NRCCACGCCCH	564	7.71	248	3.39	2.27	12	5.47e-31	-69.68	5.82e-28	-62.71	2.81e-30	-68.04
103	motif_db/CIS-BP_2.00/Homo_sapiens.meme	M04575_2.00	ZNF713	BTTTCYWGTCTTTTTTCTD	4144	56.67	3453	47.22	1.2	3.2	1.52e-30	-68.66	1.62e-27	-61.69	7.72e-30	-67.03
104	motif_db/CIS-BP_2.00/Homo_sapiens.meme	M08398_2.00	KLF14	GGCCMCGCCCMCYB	2151	29.41	1551	21.21	1.39	8.2	1.85e-30	-68.46	1.97e-27	-61.49	9.31e-30	-66.85
105	motif_db/CIS-BP_2.00/Homo_sapiens.meme	M07582_2.00	ZNF557	TCCCTG	3749	51.26	3066	41.93	1.22	9.1	5.65e-30	-67.35	6.02e-27	-60.37	2.82e-29	-65.74
106	motif_db/CIS-BP_2.00/Homo_sapiens.meme	M07721_2.00	ZNF786	CTGGGRC	759	10.38	393	5.37	1.93	12	7.09e-30	-67.12	7.55e-27	-60.15	3.51e-29	-65.52
107	motif_db/CIS-BP_2.00/Homo_sapiens.meme	M08111_2.00	FLI1	GGAAGGAAGGAAGGAAGG	1005	13.74	582	7.96	1.73	4.6	8.29e-30	-66.96	8.83e-27	-59.99	4.06e-29	-65.37
108	motif_db/CIS-BP_2.00/Homo_sapiens.meme	M03355_2.00	RARB	AAAGGTCAARAGGTCA	1040	14.22	613	8.38	1.7	6.8	2.52e-29	-65.85	2.69e-26	-58.88	1.23e-28	-64.27
109	motif_db/CIS-BP_2.00/Homo_sapiens.meme	M07937_2.00	ZBTB7A	CNSVGMCCCYYSCCC	1572	21.5	1060	14.49	1.48	9.4	1.4e-28	-64.14	1.49e-25	-57.16	6.74e-28	-62.56
110	motif_db/CIS-BP_2.00/Homo_sapiens.meme	M00152_2.00	(ZBTB3)_(Mus_musculus)_(DBD_1.00)	CRCTGCANN	1678	22.95	1155	15.79	1.45	8.9	3.42e-28	-63.24	3.65e-25	-56.27	1.63e-27	-61.68
111	motif_db/CIS-BP_2.00/Homo_sapiens.meme	M07714_2.00	ZNF429	WRCCCATTKNBKCCTMTGCCH	945	12.92	548	7.49	1.72	10	7.71e-28	-62.43	8.21e-25	-55.46	3.64e-27	-60.88
112	motif_db/CIS-BP_2.00/Homo_sapiens.meme	M04517_2.00	SP8	RCCACGCCCMCH	1919	26.24	1374	18.79	1.4	8.7	1.94e-27	-61.51	2.07e-24	-54.54	9.09e-27	-59.96
113	motif_db/CIS-BP_2.00/Homo_sapiens.meme	M08279_2.00	ZNF37A	YYYYYYTCC	4929	67.4	4304	58.85	1.15	7.7	4.9e-27	-60.58	5.22e-24	-53.61	2.27e-26	-59.05
114	motif_db/CIS-BP_2.00/Homo_sapiens.meme	M08318_2.00	ZNF394	BCHBCYCCAGCTACTCCTYY	1748	23.9	1229	16.81	1.42	9	7.85e-27	-60.11	8.36e-24	-53.14	3.61e-26	-58.58
115	motif_db/CIS-BP_2.00/Homo_sapiens.meme	M07625_2.00	ZNF212	TCTCTCTCTCTCTCTCTCTCTCTCTCTCTC	222	3.04	53	0.72	4.13	8.8	1.68e-26	-59.35	1.79e-23	-52.37	7.68e-26	-57.83
116	motif_db/CIS-BP_2.00/Homo_sapiens.meme	M08091_2.00	KLF4	MCACACCCTNN	565	7.73	270	3.69	2.09	12	1.77e-26	-59.3	1.89e-23	-52.32	8.01e-26	-57.79
117	motif_db/CIS-BP_2.00/Homo_sapiens.meme	M07564_2.00	ZNF582	GCKTNCNCAGCCSHMGRMATKYCAGAGG	870	11.9	499	6.82	1.74	2	2.22e-26	-59.07	2.36e-23	-52.1	9.94e-26	-57.57
118	motif_db/CIS-BP_2.00/Homo_sapiens.meme	M07677_2.00	ZNF566	SCCCGCCTCCYKTBCCGCYNB	2619	35.81	2025	27.69	1.29	6.5	2.71e-26	-58.87	2.88e-23	-51.9	1.2e-25	-57.38
119	motif_db/CIS-BP_2.00/Homo_sapiens.meme	M00779_2.00	(KLF8)_(Mus_musculus)_(DBD_1.00)	NMCMCRCCCH	705	9.64	374	5.11	1.88	11	3.64e-26	-58.57	3.88e-23	-51.6	1.61e-25	-57.09
120	motif_db/CIS-BP_2.00/Homo_sapiens.meme	M02666_2.00	ZNF354C	MTCCAC	450	6.15	193	2.64	2.32	9.9	6.43e-26	-58.01	6.84e-23	-51.04	2.81e-25	-56.53
121	motif_db/CIS-BP_2.00/Homo_sapiens.meme	M03344_2.00	BORCS8-MEF2B	RCTAWAAATAGM	970	13.26	584	7.99	1.66	9.9	1.55e-25	-57.13	1.65e-22	-50.15	6.72e-25	-55.66
122	motif_db/CIS-BP_2.00/Homo_sapiens.meme	M08380_2.00	ZNF98	BTKCCTTTTTBTTGTCYTTDT	5434	74.31	4861	66.47	1.12	5.6	1.68e-25	-57.05	1.79e-22	-50.08	7.21e-25	-55.59
123	motif_db/CIS-BP_2.00/Homo_sapiens.meme	M07649_2.00	ZNF619	CSCBCCCCYCCCBCAGGAATKYS	5354	73.21	4775	65.29	1.12	0.12	1.73e-25	-57.01	1.85e-22	-50.04	7.39e-25	-55.56
124	motif_db/CIS-BP_2.00/Homo_sapiens.meme	M02727_2.00	TFEB	RTCACGTGAY	2189	29.93	1642	22.45	1.33	7.3	4.27e-25	-56.11	4.55e-22	-49.14	1.81e-24	-54.67
125	motif_db/CIS-BP_2.00/Homo_sapiens.meme	M04558_2.00	SP3	NRCCACGCCCMCH	2797	38.25	2213	30.26	1.26	7.1	1.4e-24	-54.93	1.49e-21	-47.96	5.85e-24	-53.49
126	motif_db/CIS-BP_2.00/Homo_sapiens.meme	M07761_2.00	ZNF90	CTGATTATTCACCCA	739	10.11	410	5.61	1.8	10	1.75e-24	-54.7	1.86e-21	-47.73	7.27e-24	-53.28
127	motif_db/CIS-BP_2.00/Homo_sapiens.meme	M02821_2.00	MGA	AGGTGTGA	649	8.87	342	4.68	1.9	12	1.76e-24	-54.7	1.88e-21	-47.72	7.27e-24	-53.28
128	motif_db/CIS-BP_2.00/Homo_sapiens.meme	M07939_2.00	E2F6	NRGGCGGGARV	5019	68.63	4432	60.6	1.13	5.6	1.8e-24	-54.67	1.92e-21	-47.7	7.38e-24	-53.26
129	motif_db/CIS-BP_2.00/Homo_sapiens.meme	M08035_2.00	TP73	RCAWGYYCWGRCATG	1534	20.98	1070	14.63	1.43	9.4	5.65e-24	-53.53	6.01e-21	-46.56	2.29e-23	-52.13
130	motif_db/CIS-BP_2.00/Homo_sapiens.meme	M07774_2.00	ZNF10	CCCTACCTC	6441	88.08	6010	82.18	1.07	4.2	6.16e-24	-53.44	6.56e-21	-46.47	2.48e-23	-52.05
131	motif_db/CIS-BP_2.00/Homo_sapiens.meme	M07611_2.00	ZNF12	BNYTYSTYNCWGCAGCDS	4339	59.33	3737	51.1	1.16	6.1	7.67e-24	-53.23	8.16e-21	-46.25	3.07e-23	-51.84
132	motif_db/CIS-BP_2.00/Homo_sapiens.meme	M04857_2.00	FOXR2	AYATAWACATAAATRWW	2303	31.49	1768	24.18	1.3	8.1	3.02e-23	-51.85	3.22e-20	-44.88	1.2e-22	-50.48
133	motif_db/CIS-BP_2.00/Homo_sapiens.meme	M04457_2.00	KLF16	VCCMCGCCCM	1996	27.29	1495	20.44	1.33	9	1.34e-22	-50.36	1.43e-19	-43.39	5.3e-22	-48.99
134	motif_db/CIS-BP_2.00/Homo_sapiens.meme	M07595_2.00	RBAK	GSYYBYTYCTYYCBC	4222	57.73	3636	49.72	1.16	7.3	1.41e-22	-50.31	1.5e-19	-43.34	5.53e-22	-48.95
135	motif_db/CIS-BP_2.00/Homo_sapiens.meme	M07626_2.00	ZNF282	CTCCCS	565	7.73	291	3.98	1.94	12	1.58e-22	-50.2	1.68e-19	-43.23	6.12e-22	-48.85
136	motif_db/CIS-BP_2.00/Homo_sapiens.meme	M07675_2.00	ZNF74	AACAAYRCTGCARTGAACATC	119	1.63	14	0.19	8	13	2.18e-22	-49.88	2.32e-19	-42.91	8.4e-22	-48.53
137	motif_db/CIS-BP_2.00/Homo_sapiens.meme	M07762_2.00	ZNF891	NSNGYBCNSVGGCTTCYAGCC	1603	21.92	1152	15.75	1.39	9	7.59e-22	-48.63	8.08e-19	-41.66	2.9e-21	-47.29
138	motif_db/CIS-BP_2.00/Homo_sapiens.meme	M07601_2.00	ZNF776	CAGATGCCRGCRYYRTGCTTC	5915	80.88	5434	74.31	1.09	1.4	7.69e-22	-48.62	8.19e-19	-41.65	2.92e-21	-47.28
139	motif_db/CIS-BP_2.00/Homo_sapiens.meme	M05589_2.00	NR5A2	TCAAGGTCRTGACCTTGA	692	9.46	391	5.35	1.77	8.3	7.82e-22	-48.6	8.32e-19	-41.63	2.95e-21	-47.27
140	motif_db/CIS-BP_2.00/Homo_sapiens.meme	M04106_2.00	BHLHE41	GTCACGTGAC	2001	27.36	1511	20.66	1.32	6.4	1.3e-21	-48.09	1.38e-18	-41.12	4.86e-21	-46.77
141	motif_db/CIS-BP_2.00/Homo_sapiens.meme	M04645_2.00	SP9	RCCACGCCCMCY	2692	36.81	2154	29.45	1.25	7.8	1.85e-21	-47.74	1.97e-18	-40.77	6.88e-21	-46.43
142	motif_db/CIS-BP_2.00/Homo_sapiens.meme	M07931_2.00	ZNF143	RACTACAAYTCCCAG	4308	58.91	3745	51.21	1.15	4.3	4.52e-21	-46.85	4.81e-18	-39.88	1.67e-20	-45.54
143	motif_db/CIS-BP_2.00/Homo_sapiens.meme	M08245_2.00	ZNF41	TGGTGBYTTAYTYCC	559	7.64	295	4.03	1.89	12	4.59e-21	-46.83	4.88e-18	-39.86	1.68e-20	-45.53
144	motif_db/CIS-BP_2.00/Homo_sapiens.meme	M05827_2.00	XPA	GTGTGAGGTGB	180	2.46	45	0.62	3.93	14	6.86e-21	-46.43	7.31e-18	-39.46	2.5e-20	-45.14
145	motif_db/CIS-BP_2.00/Homo_sapiens.meme	M07685_2.00	ZFP69B	BTTTCCAGCCAC	4814	65.83	4270	58.39	1.13	5.7	1.01e-20	-46.04	1.08e-17	-39.07	3.67e-20	-44.75
146	motif_db/CIS-BP_2.00/Homo_sapiens.meme	M08365_2.00	ZSCAN30	GCCWGSRGCCHBSVS	2538	34.71	2019	27.61	1.26	7.9	1.06e-20	-45.99	1.13e-17	-39.02	3.82e-20	-44.71
147	motif_db/CIS-BP_2.00/Homo_sapiens.meme	M06465_2.00	PLAG1	CCCCCTWGGGCCCC	513	7.01	264	3.61	1.94	11	1.51e-20	-45.64	1.6e-17	-38.67	5.37e-20	-44.37
148	motif_db/CIS-BP_2.00/Homo_sapiens.meme	M05597_2.00	NR2C1	NRGGTCRYGACCYB	519	7.1	269	3.68	1.93	11	1.91e-20	-45.4	2.04e-17	-38.43	6.77e-20	-44.14
149	motif_db/CIS-BP_2.00/Homo_sapiens.meme	M07620_2.00	ZNF558	TKGGATHTGTRGATTCATGYCTTTCAT	3825	52.3	3270	44.71	1.17	5.1	2.36e-20	-45.19	2.52e-17	-38.22	8.31e-20	-43.93
150	motif_db/CIS-BP_2.00/Homo_sapiens.meme	M02772_2.00	MLXIPL	ATCACGTGAY	2440	33.37	1934	26.45	1.26	7.3	3.49e-20	-44.8	3.72e-17	-37.83	1.22e-19	-43.55
151	motif_db/CIS-BP_2.00/Homo_sapiens.meme	M02902_2.00	HIC2	RTGCCCRSB	256	3.5	91	1.24	2.79	12	5.19e-20	-44.4	5.53e-17	-37.43	1.8e-19	-43.16
152	motif_db/CIS-BP_2.00/Homo_sapiens.meme	M07985_2.00	ESR1	DGBYCAAGGTCASN	1336	18.27	938	12.83	1.42	9.9	5.49e-20	-44.35	5.85e-17	-37.38	1.89e-19	-43.11
153	motif_db/CIS-BP_2.00/Homo_sapiens.meme	M08142_2.00	IRF1	AAANHGAAAGTGAAASYRRRN	5803	79.35	5337	72.98	1.09	4.5	8.23e-20	-43.94	8.76e-17	-36.97	2.82e-19	-42.71
154	motif_db/CIS-BP_2.00/Homo_sapiens.meme	M08284_2.00	ZNF213	CGCCGCCYGVKKTCK	491	6.71	258	3.53	1.9	11	8.9e-19	-41.56	9.48e-16	-34.59	3.03e-18	-40.34
155	motif_db/CIS-BP_2.00/Homo_sapiens.meme	M07668_2.00	ZNF530	BBCYGSCCCTYKCCYTKC	1118	15.29	765	10.46	1.46	9.8	1.48e-18	-41.05	1.58e-15	-34.08	5.02e-18	-39.83
156	motif_db/CIS-BP_2.00/Homo_sapiens.meme	M03682_2.00	(SP5)_(Drosophila_melanogaster)_(DBD_0.94)	MBGCCACGCCCAGT	1562	21.36	1153	15.77	1.35	7.3	1.81e-18	-40.85	1.93e-15	-33.88	6.08e-18	-39.64
157	motif_db/CIS-BP_2.00/Homo_sapiens.meme	M04551_2.00	KLF17	MMCCACGCACCCMTY	3380	46.22	2861	39.12	1.18	6.1	2.28e-18	-40.62	2.43e-15	-33.65	7.61e-18	-39.42
158	motif_db/CIS-BP_2.00/Homo_sapiens.meme	M04418_2.00	KLF3	GRCCRCGCCCH	134	1.83	28	0.38	4.66	16	2.96e-18	-40.36	3.15e-15	-33.39	9.82e-18	-39.16
159	motif_db/CIS-BP_2.00/Homo_sapiens.meme	M08269_2.00	ZBTB12	NBRATCTAGAACVYNNN	1726	23.6	1304	17.83	1.32	8.3	3.96e-18	-40.07	4.22e-15	-33.1	1.31e-17	-38.88
160	motif_db/CIS-BP_2.00/Homo_sapiens.meme	M05677_2.00	RORB	DAWBTRGGTYAGTRGGTCAN	515	7.04	281	3.84	1.83	10	6.09e-18	-39.64	6.49e-15	-32.67	2e-17	-38.45
161	motif_db/CIS-BP_2.00/Homo_sapiens.meme	M05613_2.00	NR5A1	NYCAAGGYCAN	1756	24.01	1335	18.26	1.32	9.4	8.19e-18	-39.34	8.72e-15	-32.37	2.67e-17	-38.16
162	motif_db/CIS-BP_2.00/Homo_sapiens.meme	M08058_2.00	MITF	NNDRGTCACGTGACYHNN	707	9.67	433	5.92	1.63	9.6	1.36e-17	-38.83	1.45e-14	-31.86	4.41e-17	-37.66
163	motif_db/CIS-BP_2.00/Homo_sapiens.meme	M07722_2.00	ZNF675	NCRTTTTGKCCYCCKRDBCCYSYNNBC	3562	48.71	3056	41.79	1.17	5.7	2.37e-17	-38.28	2.53e-14	-31.31	7.63e-17	-37.11
164	motif_db/CIS-BP_2.00/Homo_sapiens.meme	M07778_2.00	ZNF224	TWYMMYYHGRDKCCAYWTGAYTYMMTKVGMTHMARY	4666	63.8	4172	57.05	1.12	3.5	3.71e-17	-37.83	3.95e-14	-30.86	1.19e-16	-36.67
165	motif_db/CIS-BP_2.00/Homo_sapiens.meme	M02779_2.00	MLX	ATCACGTGAY	1034	14.14	708	9.68	1.46	8.8	4.48e-17	-37.64	4.77e-14	-30.67	1.42e-16	-36.49
166	motif_db/CIS-BP_2.00/Homo_sapiens.meme	M07822_2.00	ATF3	GGTCACGTGRS	3185	43.55	2692	36.81	1.18	6.5	5.13e-17	-37.51	5.47e-14	-30.54	1.62e-16	-36.36
167	motif_db/CIS-BP_2.00/Homo_sapiens.meme	M07682_2.00	ZNF555	CACACYSTSASCWKMWGAGMYGRCRCCCGC	1518	20.76	1131	15.47	1.34	0.13	5.22e-17	-37.49	5.55e-14	-30.52	1.64e-16	-36.35
168	motif_db/CIS-BP_2.00/Homo_sapiens.meme	M04150_2.00	HAND2	AACACCTGCD	438	5.99	230	3.15	1.9	12	7.14e-17	-37.18	7.6e-14	-30.21	2.23e-16	-36.04
169	motif_db/CIS-BP_2.00/Homo_sapiens.meme	M08378_2.00	ZFP28	KKDYYHHNTATKATYTCYWTTTCYTCWGDTGTC	4358	59.59	3863	52.82	1.13	6	8.86e-17	-36.96	9.44e-14	-29.99	2.75e-16	-35.83
170	motif_db/CIS-BP_2.00/Homo_sapiens.meme	M03456_2.00	RFX4	SGTWRCCATGGYWACN	2547	34.83	2084	28.5	1.22	6.3	1.04e-16	-36.8	1.11e-13	-29.83	3.2e-16	-35.68
171	motif_db/CIS-BP_2.00/Homo_sapiens.meme	M07569_2.00	ZNF343	CGCTTCCCC	1008	13.78	691	9.45	1.46	10	1.47e-16	-36.45	1.57e-13	-29.48	4.52e-16	-35.33
172	motif_db/CIS-BP_2.00/Homo_sapiens.meme	M07566_2.00	ZNF324	TYRARCCATCCTTGC	2992	40.91	2513	34.36	1.19	7	1.65e-16	-36.34	1.75e-13	-29.37	5.02e-16	-35.23
173	motif_db/CIS-BP_2.00/Homo_sapiens.meme	M02920_2.00	ZBTB7C	RCGACCACCRAN	3230	44.17	2745	37.54	1.18	7.6	1.9e-16	-36.2	2.02e-13	-29.23	5.75e-16	-35.09
174	motif_db/CIS-BP_2.00/Homo_sapiens.meme	M08252_2.00	ZNF415	CHGGCTCCAKCDYCB	899	12.29	602	8.23	1.49	11	3.02e-16	-35.74	3.21e-13	-28.77	9.09e-16	-34.63
175	motif_db/CIS-BP_2.00/Homo_sapiens.meme	M07791_2.00	MAX	SDSCACGTGRYHB	3212	43.92	2731	37.34	1.18	6.9	3.12e-16	-35.7	3.33e-13	-28.73	9.36e-16	-34.61
176	motif_db/CIS-BP_2.00/Homo_sapiens.meme	M08251_2.00	ZNF16	CCYTCYATGGCTCCC	5318	72.72	4870	66.59	1.09	3.3	4.33e-16	-35.38	4.61e-13	-28.41	1.29e-15	-34.29
177	motif_db/CIS-BP_2.00/Homo_sapiens.meme	M04170_2.00	ARNT2	GTCACGTGMN	2929	40.05	2459	33.63	1.19	6.6	4.37e-16	-35.37	4.65e-13	-28.4	1.29e-15	-34.28
178	motif_db/CIS-BP_2.00/Homo_sapiens.meme	M07718_2.00	ZNF682	VVCCCYCSMNGGCYMAGCCCC	3387	46.31	2906	39.74	1.17	6.2	5.31e-16	-35.17	5.66e-13	-28.2	1.56e-15	-34.09
179	motif_db/CIS-BP_2.00/Homo_sapiens.meme	M07748_2.00	ZNF28	GGGCACCCCDCMNVCCCC	958	13.1	655	8.96	1.46	9.8	6.6e-16	-34.95	7.03e-13	-27.98	1.93e-15	-33.88
180	motif_db/CIS-BP_2.00/Homo_sapiens.meme	M07807_2.00	USF1	GGTCACGTGRSSSSV	603	8.25	366	5	1.65	10	1.61e-15	-34.06	1.71e-12	-27.09	4.69e-15	-32.99
181	motif_db/CIS-BP_2.00/Homo_sapiens.meme	M07979_2.00	MEF2A	NDKCYAAAAATAGMH	2091	28.59	1675	22.9	1.25	9	2.01e-15	-33.84	2.15e-12	-26.87	5.84e-15	-32.77
182	motif_db/CIS-BP_2.00/Homo_sapiens.meme	M07565_2.00	ZNF506	NNKYTGGGGGCTCVYCCN	561	7.67	334	4.57	1.68	11	2.33e-15	-33.69	2.48e-12	-26.72	6.71e-15	-32.64
183	motif_db/CIS-BP_2.00/Homo_sapiens.meme	M07603_2.00	ZNF19	TBCNCCGTCAGDRCCCYW	4342	59.37	3871	52.93	1.12	6.7	2.34e-15	-33.69	2.5e-12	-26.72	6.72e-15	-32.63
184	motif_db/CIS-BP_2.00/Homo_sapiens.meme	M05797_2.00	TBX18	DRAGGTGTGAAR	796	10.88	526	7.19	1.51	11	3.58e-15	-33.26	3.81e-12	-26.29	1.02e-14	-32.22
185	motif_db/CIS-BP_2.00/Homo_sapiens.meme	M07938_2.00	E2F1	VRRVRGVGCGCGCRS	5394	73.76	4966	67.91	1.09	2.7	3.84e-15	-33.19	4.09e-12	-26.22	1.09e-14	-32.15
186	motif_db/CIS-BP_2.00/Homo_sapiens.meme	M07785_2.00	USF2	GGTCACGTGRSSSSV	602	8.23	372	5.09	1.62	10	1.2e-14	-32.06	1.27e-11	-25.09	3.37e-14	-31.02
187	motif_db/CIS-BP_2.00/Homo_sapiens.meme	M08135_2.00	DUX4	TAAYYYAATCA	4740	64.82	4293	58.7	1.1	6.4	1.58e-14	-31.78	1.68e-11	-24.81	4.43e-14	-30.75
188	motif_db/CIS-BP_2.00/Homo_sapiens.meme	M07855_2.00	YY1	GBSGCCGCCATBTTG	2416	33.04	1997	27.31	1.21	7	2.46e-14	-31.34	2.62e-11	-24.37	6.85e-14	-30.31
189	motif_db/CIS-BP_2.00/Homo_sapiens.meme	M07950_2.00	ETS1	GCMTBCTGGGARWTGTAGTYY	2309	31.57	1897	25.94	1.22	4.2	2.9e-14	-31.17	3.08e-11	-24.2	8.04e-14	-30.15
190	motif_db/CIS-BP_2.00/Homo_sapiens.meme	M02794_2.00	MESP1	HRCACCTGBN	1471	20.11	1124	15.37	1.31	10	3.24e-14	-31.06	3.45e-11	-24.09	8.94e-14	-30.05
191	motif_db/CIS-BP_2.00/Homo_sapiens.meme	M08019_2.00	STAT2	TTHAGTTTCRNTTTC	5313	72.65	4896	66.95	1.09	5.4	3.29e-14	-31.05	3.5e-11	-24.08	9.02e-14	-30.04
192	motif_db/CIS-BP_2.00/Homo_sapiens.meme	M02790_2.00	HEY2	GGCACGTGYC	1524	20.84	1173	16.04	1.3	8.4	3.98e-14	-30.86	4.23e-11	-23.89	1.09e-13	-29.85
193	motif_db/CIS-BP_2.00/Homo_sapiens.meme	M05661_2.00	NR2F1	RRGGTCAAAGGTCAN	2486	33.99	2068	28.28	1.2	7.1	4.66e-14	-30.7	4.96e-11	-23.73	1.27e-13	-29.7
194	motif_db/CIS-BP_2.00/Homo_sapiens.meme	M04467_2.00	ZNF740	CYGCCCCCCCCAC	4315	59	3867	52.88	1.12	4.5	4.76e-14	-30.68	5.07e-11	-23.71	1.29e-13	-29.68
195	motif_db/CIS-BP_2.00/Homo_sapiens.meme	M04060_2.00	HES2	GRCACGTGCC	832	11.38	567	7.75	1.47	9.6	4.96e-14	-30.63	5.28e-11	-23.66	1.33e-13	-29.65
196	motif_db/CIS-BP_2.00/Homo_sapiens.meme	M01113_2.00	SOHLH2	GCACGWGSN	777	10.62	521	7.12	1.49	11	5.18e-14	-30.59	5.52e-11	-23.62	1.39e-13	-29.61
197	motif_db/CIS-BP_2.00/Homo_sapiens.meme	M02773_2.00	TFE3	VBCACGTGAY	260	3.56	119	1.63	2.18	13	8.55e-14	-30.09	9.1e-11	-23.12	2.28e-13	-29.11
198	motif_db/CIS-BP_2.00/Homo_sapiens.meme	M03042_2.00	FOXD2	DRTMAATATTWDYD	1049	14.34	756	10.34	1.39	10	9.56e-14	-29.98	1.02e-10	-23.01	2.53e-13	-29
199	motif_db/CIS-BP_2.00/Homo_sapiens.meme	M07681_2.00	ZNF17	GRDBYDNNNSTGCMTGYTCHKGHNMRNVNN	1366	18.68	1036	14.17	1.32	9.1	9.73e-14	-29.96	1.04e-10	-22.99	2.56e-13	-28.99
200	motif_db/CIS-BP_2.00/Homo_sapiens.meme	M03448_2.00	NFKB1	AGGGGAWTCCCCT	255	3.49	117	1.6	2.17	11	1.71e-13	-29.4	1.82e-10	-22.43	4.47e-13	-28.44
201	motif_db/CIS-BP_2.00/Homo_sapiens.meme	M04659_2.00	MBNL2	HYGCYTYGCYTH	5280	72.2	4879	66.72	1.08	6.5	3.37e-13	-28.72	3.59e-10	-21.75	8.79e-13	-27.76
202	motif_db/CIS-BP_2.00/Homo_sapiens.meme	M07766_2.00	ZNF879	DGCTVTRKTGTTWGGTGCATWTATRTTTAWWATTGTTAT	1870	25.57	1505	20.58	1.24	9	4.36e-13	-28.46	4.65e-10	-21.49	1.13e-12	-27.51
203	motif_db/CIS-BP_2.00/Homo_sapiens.meme	M00276_2.00	PBX4	NCTAATTAAWN	3899	53.32	3469	47.44	1.12	7.2	6.39e-13	-28.08	6.8e-10	-21.11	1.65e-12	-27.13
204	motif_db/CIS-BP_2.00/Homo_sapiens.meme	M08065_2.00	BACH2	NVTGACTCAGCANH	2942	40.23	2527	34.55	1.16	7.5	7.33e-13	-27.94	7.81e-10	-20.97	1.88e-12	-27
205	motif_db/CIS-BP_2.00/Homo_sapiens.meme	M02396_2.00	NR2F6	NVRGGTCA	368	5.03	203	2.78	1.81	11	9.08e-13	-27.73	9.67e-10	-20.76	2.32e-12	-26.79
206	motif_db/CIS-BP_2.00/Homo_sapiens.meme	M04274_2.00	ATF4	GGATGACGTCATCC	2904	39.71	2492	34.08	1.17	3.9	9.23e-13	-27.71	9.83e-10	-20.74	2.35e-12	-26.78
207	motif_db/CIS-BP_2.00/Homo_sapiens.meme	M07686_2.00	ZFP69	TAKCTTGTTTCYAGYCWC	5853	80.04	5499	75.19	1.06	4.8	1.21e-12	-27.44	1.29e-09	-20.47	3.06e-12	-26.51
208	motif_db/CIS-BP_2.00/Homo_sapiens.meme	M01931_2.00	DMRT2	KAATKTATWN	4879	66.72	4472	61.15	1.09	7	1.34e-12	-27.34	1.43e-09	-20.37	3.37e-12	-26.41
209	motif_db/CIS-BP_2.00/Homo_sapiens.meme	M05428_2.00	PAX2	NCGTCACGCWYSRVYGCNYN	2135	29.19	1761	24.08	1.21	7.4	1.47e-12	-27.25	1.56e-09	-20.28	3.68e-12	-26.33
210	motif_db/CIS-BP_2.00/Homo_sapiens.meme	M05621_2.00	RORC	TAGGTCAYGACCTA	922	12.61	660	9.03	1.4	9.3	1.67e-12	-27.12	1.78e-09	-20.15	4.17e-12	-26.2
211	motif_db/CIS-BP_2.00/Homo_sapiens.meme	M02448_2.00	(RFX6)_(Cavia_porcellus)_(DBD_0.71)	GTHDCYDDGS	3008	41.13	2598	35.53	1.16	7.5	1.72e-12	-27.09	1.83e-09	-20.12	4.28e-12	-26.18
212	motif_db/CIS-BP_2.00/Homo_sapiens.meme	M04402_2.00	GLI2	VGACCACCCACGWHG	1087	14.86	805	11.01	1.35	8.7	2.04e-12	-26.92	2.17e-09	-19.95	5.04e-12	-26.01
213	motif_db/CIS-BP_2.00/Homo_sapiens.meme	M01719_2.00	(ARNT)_(Mus_musculus)_(DBD_1.00)	NNGCACGTGANN	2423	33.13	2037	27.85	1.19	8	2.29e-12	-26.8	2.44e-09	-19.83	5.64e-12	-25.9
214	motif_db/CIS-BP_2.00/Homo_sapiens.meme	M02990_2.00	ETV6	CCGGAASCGGAAGTR	5304	72.53	4920	67.28	1.08	1.8	2.46e-12	-26.73	2.62e-09	-19.76	6.04e-12	-25.83
215	motif_db/CIS-BP_2.00/Homo_sapiens.meme	M08364_2.00	ZBTB6	SYGGCTCCAGCRYCB	927	12.68	667	9.12	1.39	11	2.87e-12	-26.58	3.06e-09	-19.6	7.01e-12	-25.68
216	motif_db/CIS-BP_2.00/Homo_sapiens.meme	M07829_2.00	JUNB	NDRTGASTCATNYHY	176	2.41	70	0.96	2.49	14	3.51e-12	-26.38	3.74e-09	-19.41	8.52e-12	-25.49
217	motif_db/CIS-BP_2.00/Homo_sapiens.meme	M04497_2.00	ZBTB7B	DCGACCACCN	3919	53.59	3504	47.91	1.12	6	3.72e-12	-26.32	3.96e-09	-19.35	8.98e-12	-25.44
218	motif_db/CIS-BP_2.00/Homo_sapiens.meme	M07842_2.00	ZEB1	CWCACCTG	815	11.14	572	7.82	1.42	11	3.81e-12	-26.29	4.06e-09	-19.32	9.17e-12	-25.41
219	motif_db/CIS-BP_2.00/Homo_sapiens.meme	M08275_2.00	ZFP64	SRBTCCCGGGSCCCS	4019	54.96	3605	49.3	1.11	4	4.02e-12	-26.24	4.28e-09	-19.27	9.62e-12	-25.37
220	motif_db/CIS-BP_2.00/Homo_sapiens.meme	M07657_2.00	ZNF816	NCCYKGCATGTCCCCMYYHYT	3653	49.95	3241	44.32	1.13	5.6	4.89e-12	-26.04	5.2e-09	-19.07	1.16e-11	-25.18
221	motif_db/CIS-BP_2.00/Homo_sapiens.meme	M04416_2.00	GLI3	VGACCACCCACGDHG	546	7.47	349	4.77	1.56	11	5.73e-12	-25.89	6.1e-09	-18.92	1.36e-11	-25.02
222	motif_db/CIS-BP_2.00/Homo_sapiens.meme	M07750_2.00	ZNF789	CTYCTGACACCA	3221	44.04	2818	38.53	1.14	7.7	7.23e-12	-25.65	7.7e-09	-18.68	1.71e-11	-24.79
223	motif_db/CIS-BP_2.00/Homo_sapiens.meme	M07602_2.00	ZNF18	RGTGTGAAYNSGNKN	1755	24	1418	19.39	1.24	9.2	7.62e-12	-25.6	8.11e-09	-18.63	1.79e-11	-24.75
224	motif_db/CIS-BP_2.00/Homo_sapiens.meme	M04449_2.00	GLIS2	ACCCCCCRCRWHGC	4302	58.83	3898	53.3	1.1	4.9	9.34e-12	-25.4	9.95e-09	-18.43	2.19e-11	-24.55
225	motif_db/CIS-BP_2.00/Homo_sapiens.meme	M07563_2.00	ZNF263	CTCCTCCCY	4600	62.9	4204	57.49	1.09	6.8	1.24e-11	-25.11	1.32e-08	-18.14	2.89e-11	-24.27
226	motif_db/CIS-BP_2.00/Homo_sapiens.meme	M07988_2.00	ESRRA	RGGTCASMNTGACCY	3406	46.57	3005	41.09	1.13	6.9	1.3e-11	-25.07	1.38e-08	-18.1	3.02e-11	-24.22
227	motif_db/CIS-BP_2.00/Homo_sapiens.meme	M02907_2.00	HINFP	CARCGTCCGCKN	591	8.08	390	5.33	1.51	11	1.65e-11	-24.83	1.76e-08	-17.86	3.82e-11	-23.99
228	motif_db/CIS-BP_2.00/Homo_sapiens.meme	M04124_2.00	ARNTL	RTCACGTGHN	3264	44.63	2869	39.23	1.14	6.6	2e-11	-24.63	2.13e-08	-17.66	4.6e-11	-23.8
229	motif_db/CIS-BP_2.00/Homo_sapiens.meme	M03552_2.00	TBX5	AGGTGTKA	858	11.73	617	8.44	1.39	10	2.01e-11	-24.63	2.14e-08	-17.66	4.61e-11	-23.8
230	motif_db/CIS-BP_2.00/Homo_sapiens.meme	M07995_2.00	PAX5	BCAGYSRAGCGTGAC	301	4.12	162	2.22	1.85	13	2.61e-11	-24.37	2.78e-08	-17.4	5.95e-11	-23.55
231	motif_db/CIS-BP_2.00/Homo_sapiens.meme	M00227_2.00	BCL6	NTAATTAATN	5441	74.4	5084	69.52	1.07	6.3	2.76e-11	-24.31	2.94e-08	-17.34	6.26e-11	-23.49
232	motif_db/CIS-BP_2.00/Homo_sapiens.meme	M08302_2.00	EGR2	CGCCCMCDC	3841	52.52	3446	47.12	1.11	6.6	3.58e-11	-24.05	3.81e-08	-17.08	8.09e-11	-23.24
233	motif_db/CIS-BP_2.00/Homo_sapiens.meme	M04090_2.00	HES1	SVCACGYGCC	2372	32.44	2013	27.53	1.18	7.1	5.12e-11	-23.7	5.45e-08	-16.73	1.15e-10	-22.89
234	motif_db/CIS-BP_2.00/Homo_sapiens.meme	M02667_2.00	(MECOM)_(Mus_musculus)_(DBD_0.98)	TNTTATCTTRTCTT	5089	69.59	4722	64.57	1.08	4.9	5.88e-11	-23.56	6.27e-08	-16.59	1.32e-10	-22.75
235	motif_db/CIS-BP_2.00/Homo_sapiens.meme	M04050_2.00	TFAP2E	HGCCYSRGGCD	4007	54.79	3619	49.49	1.11	5.4	7.41e-11	-23.33	7.89e-08	-16.36	1.65e-10	-22.52
236	motif_db/CIS-BP_2.00/Homo_sapiens.meme	M08281_2.00	ZNF586	CCTCYRGGCCTG	2165	29.6	1820	24.89	1.19	6.8	8.2e-11	-23.22	8.73e-08	-16.25	1.82e-10	-22.43
237	motif_db/CIS-BP_2.00/Homo_sapiens.meme	M07711_2.00	ZNF431	BNGRCTTCYAGCCYB	4911	67.15	4541	62.09	1.08	5.7	8.66e-11	-23.17	9.23e-08	-16.2	1.92e-10	-22.38
238	motif_db/CIS-BP_2.00/Homo_sapiens.meme	M05799_2.00	TBX2	NYVACACSWN	1563	21.37	1258	17.2	1.24	9	9.1e-11	-23.12	9.69e-08	-16.15	2e-10	-22.33
239	motif_db/CIS-BP_2.00/Homo_sapiens.meme	M08094_2.00	ZBTB33	BTCTCGCGAGABYTS	1812	24.78	1489	20.36	1.22	6.8	9.27e-11	-23.1	9.87e-08	-16.13	2.03e-10	-22.32
240	motif_db/CIS-BP_2.00/Homo_sapiens.meme	M05763_2.00	BBX	TGAACRVYGTTCA	701	9.59	490	6.7	1.43	9.3	9.83e-11	-23.04	1.05e-07	-16.07	2.15e-10	-22.26
241	motif_db/CIS-BP_2.00/Homo_sapiens.meme	M07757_2.00	ZNF783	CSGCGKCC	653	8.93	450	6.15	1.45	11	1.14e-10	-22.9	1.21e-07	-15.93	2.47e-10	-22.12
242	motif_db/CIS-BP_2.00/Homo_sapiens.meme	M02833_2.00	BATF3	TGATGACGTCATCA	3043	41.61	2668	36.48	1.14	1.8	1.14e-10	-22.89	1.22e-07	-15.92	2.48e-10	-22.12
243	motif_db/CIS-BP_2.00/Homo_sapiens.meme	M02774_2.00	MNT	RVCACGTGMH	487	6.66	313	4.28	1.55	11	1.36e-10	-22.72	1.45e-07	-15.75	2.93e-10	-21.95
244	motif_db/CIS-BP_2.00/Homo_sapiens.meme	M04191_2.00	HES7	NVCRCGTGCC	1329	18.17	1047	14.32	1.27	8.5	1.44e-10	-22.66	1.53e-07	-15.69	3.09e-10	-21.9
245	motif_db/CIS-BP_2.00/Homo_sapiens.meme	M07980_2.00	MEF2C	DDKCYAAAAATAGMH	2012	27.51	1680	22.97	1.2	8.9	1.45e-10	-22.65	1.55e-07	-15.68	3.11e-10	-21.89
246	motif_db/CIS-BP_2.00/Homo_sapiens.meme	M07947_2.00	ELF1	VVVASCCGGAAGYGS	1211	16.56	941	12.87	1.29	8.9	1.63e-10	-22.54	1.74e-07	-15.57	3.47e-10	-21.78
247	motif_db/CIS-BP_2.00/Homo_sapiens.meme	M07664_2.00	ZNF716	WADNTTNVTMTTTCY	5779	79.02	5463	74.7	1.06	6.3	3.21e-10	-21.86	3.42e-07	-14.89	6.81e-10	-21.11
248	motif_db/CIS-BP_2.00/Homo_sapiens.meme	M08080_2.00	ZEB2	BNCACCTGSNN	1579	21.59	1282	17.53	1.23	9.9	3.32e-10	-21.83	3.53e-07	-14.86	7.01e-10	-21.08
249	motif_db/CIS-BP_2.00/Homo_sapiens.meme	M04477_2.00	OSR1	HGCTACYGTD	3191	43.63	2823	38.6	1.13	7.6	3.44e-10	-21.79	3.66e-07	-14.82	7.25e-10	-21.05
250	motif_db/CIS-BP_2.00/Homo_sapiens.meme	M03036_2.00	FOXC2	WGTMAATATTKACH	1020	13.95	775	10.6	1.32	9.4	3.71e-10	-21.72	3.95e-07	-14.74	7.78e-10	-20.97
251	motif_db/CIS-BP_2.00/Homo_sapiens.meme	M05699_2.00	NFKB2	HGGTRCTTCCCCB	264	3.61	142	1.94	1.85	13	4.28e-10	-21.57	4.55e-07	-14.6	8.93e-10	-20.84
252	motif_db/CIS-BP_2.00/Homo_sapiens.meme	M05629_2.00	THRB	RRGGTCAAAGGTCAN	3614	49.42	3243	44.35	1.11	6.3	4.34e-10	-21.56	4.62e-07	-14.59	9.02e-10	-20.83
253	motif_db/CIS-BP_2.00/Homo_sapiens.meme	M07613_2.00	ZNF3	TCWNTYAKTCADTCA	5158	70.53	4813	65.81	1.07	6	5.03e-10	-21.41	5.35e-07	-14.44	1.04e-09	-20.68
254	motif_db/CIS-BP_2.00/Homo_sapiens.meme	M07633_2.00	ZIK1	CHNTCBYWKTGCYWTTGCCWT	1179	16.12	921	12.59	1.28	9.4	6.54e-10	-21.15	6.96e-07	-14.18	1.35e-09	-20.42
255	motif_db/CIS-BP_2.00/Homo_sapiens.meme	M03558_2.00	TBX4	AGGTGTGA	829	11.34	611	8.35	1.36	11	8.06e-10	-20.94	8.59e-07	-13.97	1.66e-09	-20.22
256	motif_db/CIS-BP_2.00/Homo_sapiens.meme	M08048_2.00	SREBF1	VTCACCCCAY	636	8.7	446	6.1	1.43	11	1.08e-09	-20.64	1.15e-06	-13.67	2.22e-09	-19.93
257	motif_db/CIS-BP_2.00/Homo_sapiens.meme	M07572_2.00	ZNF419	AATRCAGCCCTAGACTCTCCC	4487	61.36	4131	56.49	1.09	2.6	1.2e-09	-20.54	1.28e-06	-13.57	2.45e-09	-19.83
258	motif_db/CIS-BP_2.00/Homo_sapiens.meme	M04272_2.00	FOSB	GATGACGTCATC	1496	20.46	1215	16.61	1.23	7.1	1.24e-09	-20.51	1.32e-06	-13.54	2.53e-09	-19.8
259	motif_db/CIS-BP_2.00/Homo_sapiens.meme	M07646_2.00	ZNF613	MTTTTTTTT	1082	14.8	838	11.46	1.29	10	1.29e-09	-20.47	1.37e-06	-13.5	2.6e-09	-19.77
260	motif_db/CIS-BP_2.00/Homo_sapiens.meme	M00285_2.00	VSX2	WATWTATTWHNN	4570	62.49	4217	57.66	1.08	6.8	1.39e-09	-20.4	1.48e-06	-13.43	2.8e-09	-19.7
261	motif_db/CIS-BP_2.00/Homo_sapiens.meme	M08345_2.00	GLIS1	CNCYSYRGGRGGYC	5273	72.1	4947	67.65	1.07	5.4	2.32e-09	-19.88	2.48e-06	-12.91	4.67e-09	-19.18
262	motif_db/CIS-BP_2.00/Homo_sapiens.meme	M07740_2.00	ZNF334	TYYTBATTHMWBWCTVAAAHMTMACTTT	6009	82.17	5727	78.31	1.05	0.4	2.63e-09	-19.76	2.8e-06	-12.79	5.26e-09	-19.06
263	motif_db/CIS-BP_2.00/Homo_sapiens.meme	M07591_2.00	ZIM3	RGVTTTCTGTTK	133	1.82	54	0.74	2.44	14	2.84e-09	-19.68	3.02e-06	-12.71	5.66e-09	-18.99
264	motif_db/CIS-BP_2.00/Homo_sapiens.meme	M08371_2.00	ZNF34	YCAGRCTTKTCYTYT	3372	46.11	3022	41.32	1.12	7.6	2.96e-09	-19.64	3.16e-06	-12.67	5.88e-09	-18.95
265	motif_db/CIS-BP_2.00/Homo_sapiens.meme	M07736_2.00	ZNF84	YTKCCTGTTCHYDCYNYTYYC	6527	89.25	6295	86.08	1.04	4.5	3.02e-09	-19.62	3.22e-06	-12.65	5.98e-09	-18.93
266	motif_db/CIS-BP_2.00/Homo_sapiens.meme	M03150_2.00	HNF1A	NGTTAATNATTAAYH	4707	64.36	4365	59.69	1.08	5.1	3.1e-09	-19.59	3.3e-06	-12.62	6.11e-09	-18.91
267	motif_db/CIS-BP_2.00/Homo_sapiens.meme	M07697_2.00	ZNF79	TTAGAKATTMWTTTCTTT	3721	50.88	3370	46.08	1.1	6.9	3.48e-09	-19.48	3.71e-06	-12.51	6.84e-09	-18.8
268	motif_db/CIS-BP_2.00/Homo_sapiens.meme	M07775_2.00	ZNF486	GCCGAAACCCGGR	2770	37.88	2437	33.32	1.14	4.5	4.88e-09	-19.14	5.2e-06	-12.17	9.55e-09	-18.47
269	motif_db/CIS-BP_2.00/Homo_sapiens.meme	M02872_2.00	ATF7	NKATGACGTCATHN	4335	59.28	3991	54.57	1.09	3.1	5.06e-09	-19.1	5.39e-06	-12.13	9.87e-09	-18.43
270	motif_db/CIS-BP_2.00/Homo_sapiens.meme	M05659_2.00	NR1D2	DWWNTRGGTYAGTRKGTCAN	424	5.8	276	3.77	1.53	11	5.53e-09	-19.01	5.89e-06	-12.04	1.07e-08	-18.35
271	motif_db/CIS-BP_2.00/Homo_sapiens.meme	M07594_2.00	ZNF300	CAKHCYSCCWHACRCMKCMCMCMYBMCAB	669	9.15	483	6.6	1.38	9.4	6.36e-09	-18.87	6.77e-06	-11.9	1.23e-08	-18.21
272	motif_db/CIS-BP_2.00/Homo_sapiens.meme	M02809_2.00	HES5	YGRCACGTGCCR	498	6.81	339	4.64	1.47	9	8.5e-09	-18.58	9.05e-06	-11.61	1.64e-08	-17.93
273	motif_db/CIS-BP_2.00/Homo_sapiens.meme	M03123_2.00	TGIF2	TGACAGSTGTCA	1342	18.35	1089	14.89	1.23	7.7	1.06e-08	-18.36	1.13e-05	-11.39	2.04e-08	-17.71
274	motif_db/CIS-BP_2.00/Homo_sapiens.meme	M07698_2.00	ZNF681	YCBSCGTCCTTK	7002	95.75	6851	93.68	1.02	3.5	1.35e-08	-18.12	1.44e-05	-11.15	2.58e-08	-17.47
275	motif_db/CIS-BP_2.00/Homo_sapiens.meme	M04837_2.00	FOXB1	HWRWGYAAATATTKACWTWR	4420	60.44	4088	55.9	1.08	3.8	1.43e-08	-18.06	1.53e-05	-11.09	2.73e-08	-17.42
276	motif_db/CIS-BP_2.00/Homo_sapiens.meme	M08055_2.00	ASCL1	VVAGCAGCTGSNN	616	8.42	442	6.04	1.39	11	1.57e-08	-17.97	1.67e-05	-11	2.99e-08	-17.33
277	motif_db/CIS-BP_2.00/Homo_sapiens.meme	M04603_2.00	ZBTB37	RTCGGCYAABWCGGCAN	173	2.37	85	1.16	2.02	12	1.73e-08	-17.87	1.85e-05	-10.9	3.28e-08	-17.23
278	motif_db/CIS-BP_2.00/Homo_sapiens.meme	M08059_2.00	SREBF2	RTCACCCCAY	646	8.83	469	6.41	1.38	11	1.96e-08	-17.75	2.09e-05	-10.78	3.7e-08	-17.11
279	motif_db/CIS-BP_2.00/Homo_sapiens.meme	M07784_2.00	TFAP2A	NBNGCCTSRGGSCAN	6121	83.7	5865	80.2	1.04	3.6	2.06e-08	-17.7	2.19e-05	-10.73	3.87e-08	-17.07
280	motif_db/CIS-BP_2.00/Homo_sapiens.meme	M07751_2.00	ZNF534	VGGYTCTYKCCCCYC	6796	92.93	6613	90.43	1.03	2.7	2.41e-08	-17.54	2.57e-05	-10.57	4.51e-08	-16.91
281	motif_db/CIS-BP_2.00/Homo_sapiens.meme	M08020_2.00	THAP1	CGCCATCTTKRNTVHGGGCAR	334	4.57	209	2.86	1.6	10	2.59e-08	-17.47	2.75e-05	-10.5	4.82e-08	-16.85
282	motif_db/CIS-BP_2.00/Homo_sapiens.meme	M01659_2.00	(ARID3B)_(Mus_musculus)_(DBD_1.00)	NTWATTAATWT	5766	78.85	5488	75.04	1.05	5.9	2.66e-08	-17.44	2.83e-05	-10.47	4.94e-08	-16.82
283	motif_db/CIS-BP_2.00/Homo_sapiens.meme	M07783_2.00	TFAP2C	NGCCYSAGGSCANDB	6492	88.77	6272	85.77	1.04	3.2	2.69e-08	-17.43	2.87e-05	-10.46	4.99e-08	-16.81
284	motif_db/CIS-BP_2.00/Homo_sapiens.meme	M04845_2.00	FOXE1	BVYTAAAYAAACAAH	5023	68.69	4714	64.46	1.07	5.5	3.33e-08	-17.22	3.55e-05	-10.25	6.15e-08	-16.6
285	motif_db/CIS-BP_2.00/Homo_sapiens.meme	M05605_2.00	NR1D1	DAWBTRGGTYAGTRGGTCAN	393	5.37	258	3.53	1.52	11	3.51e-08	-17.16	3.74e-05	-10.19	6.46e-08	-16.56
286	motif_db/CIS-BP_2.00/Homo_sapiens.meme	M04293_2.00	CREB3L4	KRTGACGTCAYC	2699	36.91	2388	32.65	1.13	6.6	3.66e-08	-17.12	3.9e-05	-10.15	6.71e-08	-16.52
287	motif_db/CIS-BP_2.00/Homo_sapiens.meme	M05723_2.00	RFX1	SGTTRCCATGGYAACS	3341	45.69	3018	41.27	1.11	3.2	3.9e-08	-17.06	4.15e-05	-10.09	7.12e-08	-16.46
288	motif_db/CIS-BP_2.00/Homo_sapiens.meme	M05359_2.00	MIXL1	TAATYNRATTA	1599	21.87	1338	18.3	1.19	8.7	3.95e-08	-17.05	4.21e-05	-10.08	7.19e-08	-16.45
289	motif_db/CIS-BP_2.00/Homo_sapiens.meme	M03166_2.00	DLX1	NNTAATTRNN	4795	65.57	4482	61.29	1.07	6.7	4.22e-08	-16.98	4.49e-05	-10.01	7.65e-08	-16.39
290	motif_db/CIS-BP_2.00/Homo_sapiens.meme	M04078_2.00	TFEC	NVCACGTGACN	371	5.07	241	3.3	1.54	12	4.5e-08	-16.92	4.8e-05	-9.95	8.14e-08	-16.32
291	motif_db/CIS-BP_2.00/Homo_sapiens.meme	M04239_2.00	CREB3	GRTGACGTGGMR	4271	58.4	3950	54.01	1.08	5.7	4.8e-08	-16.85	5.11e-05	-9.88	8.65e-08	-16.26
292	motif_db/CIS-BP_2.00/Homo_sapiens.meme	M08053_2.00	MYCN	NVCCACGTGGBN	492	6.73	343	4.69	1.43	11	6.21e-08	-16.59	6.61e-05	-9.62	1.11e-07	-16.01
293	motif_db/CIS-BP_2.00/Homo_sapiens.meme	M07759_2.00	ZNF611	GGAGCGCCBSNGCCSGSC	2497	34.14	2198	30.06	1.14	6.1	6.49e-08	-16.55	6.91e-05	-9.58	1.16e-07	-15.97
294	motif_db/CIS-BP_2.00/Homo_sapiens.meme	M04831_2.00	FOXA3	CSTTAWGTAAACAAAS	6368	87.08	6143	84	1.04	1.4	6.8e-08	-16.5	7.25e-05	-9.53	1.21e-07	-15.92
295	motif_db/CIS-BP_2.00/Homo_sapiens.meme	M07705_2.00	ZNF799	GCCAATCACTGAGACARCARGTRTTGC	5596	76.52	5318	72.72	1.05	2	7.01e-08	-16.47	7.47e-05	-9.5	1.25e-07	-15.9
296	motif_db/CIS-BP_2.00/Homo_sapiens.meme	M07765_2.00	ZNF492	CCTTTTTRKTGYTCTTKT	5859	80.12	5596	76.52	1.05	4.2	7.22e-08	-16.44	7.68e-05	-9.47	1.28e-07	-15.87
297	motif_db/CIS-BP_2.00/Homo_sapiens.meme	M04041_2.00	ATF6B	GRTGACGTGGCA	5614	76.77	5338	72.99	1.05	3.1	7.82e-08	-16.36	8.33e-05	-9.39	1.38e-07	-15.8
298	motif_db/CIS-BP_2.00/Homo_sapiens.meme	M08278_2.00	ZNF76	BCGCRRDGCMTKCTGGGARWT	5273	72.1	4982	68.13	1.06	2.8	8.04e-08	-16.34	8.56e-05	-9.37	1.41e-07	-15.77
299	motif_db/CIS-BP_2.00/Homo_sapiens.meme	M04461_2.00	EGR4	HMCGCCCACGCAH	6647	90.89	6453	88.24	1.03	0.19	8.64e-08	-16.26	9.2e-05	-9.29	1.51e-07	-15.7
300	motif_db/CIS-BP_2.00/Homo_sapiens.meme	M05807_2.00	EOMES	DAGGTGTGAW	1818	24.86	1551	21.21	1.17	9.2	8.67e-08	-16.26	9.23e-05	-9.29	1.52e-07	-15.7
301	motif_db/CIS-BP_2.00/Homo_sapiens.meme	M07725_2.00	ZNF615	AAGMACTGTACT	339	4.64	218	2.98	1.55	12	9.8e-08	-16.14	0.000104	-9.17	1.71e-07	-15.58
302	motif_db/CIS-BP_2.00/Homo_sapiens.meme	M04607_2.00	SNAI3	TRCACCTGYY	1416	19.36	1176	16.08	1.2	9.7	1.12e-07	-16	0.000119	-9.03	1.94e-07	-15.45
303	motif_db/CIS-BP_2.00/Homo_sapiens.meme	M08387_2.00	ZBTB14	SCGCGCSCC	98	1.34	38	0.52	2.54	15	1.21e-07	-15.93	0.000128	-8.96	2.09e-07	-15.38
304	motif_db/CIS-BP_2.00/Homo_sapiens.meme	M08349_2.00	EGR3	CKCCCCCDC	4471	61.14	4165	56.95	1.07	6.1	1.45e-07	-15.74	0.000155	-8.77	2.51e-07	-15.2
305	motif_db/CIS-BP_2.00/Homo_sapiens.meme	M03049_2.00	FOXO6	GTAAACATGTTTAC	2825	38.63	2526	34.54	1.12	4.8	1.55e-07	-15.68	0.000166	-8.71	2.67e-07	-15.13
306	motif_db/CIS-BP_2.00/Homo_sapiens.meme	M05283_2.00	IRX1	DACAYRNNDWNNYRTGTH	1752	23.96	1494	20.43	1.17	7.8	1.56e-07	-15.67	0.000166	-8.7	2.67e-07	-15.13
307	motif_db/CIS-BP_2.00/Homo_sapiens.meme	M05894_2.00	SOX5	DAACAATRRN	1816	24.83	1555	21.26	1.17	9.3	1.64e-07	-15.62	0.000174	-8.65	2.8e-07	-15.09
308	motif_db/CIS-BP_2.00/Homo_sapiens.meme	M00451_2.00	(DBX1)_(Mus_musculus)_(DBD_0.96)	ATTAATTA	1444	19.75	1207	16.5	1.2	9.7	2.01e-07	-15.42	0.000214	-8.45	3.42e-07	-14.89
309	motif_db/CIS-BP_2.00/Homo_sapiens.meme	M08344_2.00	ZNF449	MNVAGCCCAACCABNNNNNNN	5400	73.84	5125	70.08	1.05	4.5	2.27e-07	-15.3	0.000241	-8.33	3.84e-07	-14.77
310	motif_db/CIS-BP_2.00/Homo_sapiens.meme	M07652_2.00	ZNF543	SGSCCCCTCCCS	3703	50.64	3399	46.48	1.09	6	2.67e-07	-15.14	0.000284	-8.16	4.52e-07	-14.61
311	motif_db/CIS-BP_2.00/Homo_sapiens.meme	M08164_2.00	NFIC	NNCTTGGCANN	3501	47.87	3199	43.74	1.09	7.9	2.93e-07	-15.04	0.000312	-8.07	4.93e-07	-14.52
312	motif_db/CIS-BP_2.00/Homo_sapiens.meme	M00270_2.00	CRX	NTAAKCY	4235	57.91	3935	53.81	1.08	5.7	3.18e-07	-14.96	0.000339	-7.99	5.35e-07	-14.44
313	motif_db/CIS-BP_2.00/Homo_sapiens.meme	M07669_2.00	ZNF730	GGGMAGCYA	2939	40.19	2647	36.2	1.11	8.3	3.65e-07	-14.82	0.000389	-7.85	6.11e-07	-14.31
314	motif_db/CIS-BP_2.00/Homo_sapiens.meme	M04915_2.00	BARX2	NTAATKRTTWWN	4399	60.15	4104	56.12	1.07	7.2	4.15e-07	-14.7	0.000441	-7.73	6.92e-07	-14.18
315	motif_db/CIS-BP_2.00/Homo_sapiens.meme	M05625_2.00	NR1I2	GRGTTCAHNSAGTTCRH	540	7.38	394	5.39	1.37	11	4.49e-07	-14.62	0.000479	-7.64	7.48e-07	-14.11
316	motif_db/CIS-BP_2.00/Homo_sapiens.meme	M08109_2.00	E2F5	KGGCGGGARVN	6394	87.43	6188	84.62	1.03	2.8	4.99e-07	-14.51	0.000531	-7.54	8.27e-07	-14.01
317	motif_db/CIS-BP_2.00/Homo_sapiens.meme	M04299_2.00	CREB5	NRTKACGTCAYN	1992	27.24	1734	23.71	1.15	8.1	5.34e-07	-14.44	0.000569	-7.47	8.84e-07	-13.94
318	motif_db/CIS-BP_2.00/Homo_sapiens.meme	M07640_2.00	ZNF791	CTCTGACCCCDCCTCCYBTCTAAA	610	8.34	456	6.24	1.34	2	5.46e-07	-14.42	0.000581	-7.45	9e-07	-13.92
319	motif_db/CIS-BP_2.00/Homo_sapiens.meme	M03363_2.00	VDR	GRGTTCATYGRGTTCA	1184	16.19	975	13.33	1.21	7.5	6.12e-07	-14.31	0.000652	-7.34	1.01e-06	-13.81
320	motif_db/CIS-BP_2.00/Homo_sapiens.meme	M08105_2.00	RBPJ	NNTTCCCABV	894	12.22	710	9.71	1.26	11	6.27e-07	-14.28	0.000667	-7.31	1.03e-06	-13.79
321	motif_db/CIS-BP_2.00/Homo_sapiens.meme	M03245_2.00	HNF1B	GTTAATNATTAAY	3347	45.77	3058	41.82	1.09	6.1	7.91e-07	-14.05	0.000843	-7.08	1.29e-06	-13.56
322	motif_db/CIS-BP_2.00/Homo_sapiens.meme	M07617_2.00	ZNF528	GMAATGRCTTCCCYK	3346	45.75	3058	41.82	1.09	6	8.59e-07	-13.97	0.000915	-7	1.4e-06	-13.48
323	motif_db/CIS-BP_2.00/Homo_sapiens.meme	M05801_2.00	TBX3	DAGGTGTSAN	2125	29.06	1867	25.53	1.14	8.8	9.14e-07	-13.91	0.000973	-6.93	1.48e-06	-13.42
324	motif_db/CIS-BP_2.00/Homo_sapiens.meme	M04018_2.00	ATF6	GRTGACGTGGCA	6473	88.51	6280	85.87	1.03	2.4	9.95e-07	-13.82	0.00106	-6.85	1.61e-06	-13.34
325	motif_db/CIS-BP_2.00/Homo_sapiens.meme	M08267_2.00	ZNF71	YAGTTTCRTTTTCY	6147	84.06	5929	81.07	1.04	3.7	1.11e-06	-13.71	0.00119	-6.74	1.8e-06	-13.23
326	motif_db/CIS-BP_2.00/Homo_sapiens.meme	M07926_2.00	BCL11A	BTTTCASTTCCYCHT	2394	32.74	2129	29.11	1.12	8.5	1.16e-06	-13.67	0.00123	-6.7	1.86e-06	-13.2
327	motif_db/CIS-BP_2.00/Homo_sapiens.meme	M07651_2.00	ZNF454	CRKRMRCCCVYCRGGGCCBRGAGCCWTTK	2934	40.12	2656	36.32	1.1	2.6	1.21e-06	-13.62	0.00129	-6.65	1.94e-06	-13.15
328	motif_db/CIS-BP_2.00/Homo_sapiens.meme	M07812_2.00	FOSL2	DRTGASTCATCCHB	212	2.9	126	1.72	1.68	13	1.29e-06	-13.56	0.00138	-6.59	2.07e-06	-13.09
329	motif_db/CIS-BP_2.00/Homo_sapiens.meme	M03191_2.00	UNCX	NTAATTVRATTAN	2176	29.76	1920	26.25	1.13	8.4	1.32e-06	-13.54	0.00141	-6.57	2.1e-06	-13.07
330	motif_db/CIS-BP_2.00/Homo_sapiens.meme	M07600_2.00	ZNF547	GCATTAGC	2220	30.36	1965	26.87	1.13	7.7	1.68e-06	-13.3	0.00178	-6.33	2.66e-06	-12.84
331	motif_db/CIS-BP_2.00/Homo_sapiens.meme	M02705_2.00	RORA	AWMWAGGTCA	482	6.59	351	4.8	1.37	12	1.69e-06	-13.29	0.0018	-6.32	2.67e-06	-12.83
332	motif_db/CIS-BP_2.00/Homo_sapiens.meme	M02707_2.00	PPARG	STAGGTCACNGTGACCYAST	2385	32.61	2128	29.1	1.12	5.5	2.28e-06	-12.99	0.00243	-6.02	3.61e-06	-12.53
333	motif_db/CIS-BP_2.00/Homo_sapiens.meme	M07618_2.00	ZNF701	CCYTWGSTKCTC	2081	28.46	1835	25.09	1.13	8.8	2.37e-06	-12.95	0.00252	-5.98	3.73e-06	-12.5
334	motif_db/CIS-BP_2.00/Homo_sapiens.meme	M01726_2.00	(HES4)_(Mus_musculus)_(DBD_0.91)	NVCACGYGHN	1232	16.85	1031	14.1	1.19	9.1	2.38e-06	-12.95	0.00253	-5.98	3.73e-06	-12.5
335	motif_db/CIS-BP_2.00/Homo_sapiens.meme	M05813_2.00	TBX20	DAGGTGTGAAGGTGTGAA	864	11.81	693	9.48	1.25	8	2.54e-06	-12.88	0.0027	-5.91	3.97e-06	-12.44
336	motif_db/CIS-BP_2.00/Homo_sapiens.meme	M05215_2.00	LMX1A	TTAATTAM	6718	91.86	6559	89.69	1.02	3.8	3.1e-06	-12.68	0.0033	-5.71	4.84e-06	-12.24
337	motif_db/CIS-BP_2.00/Homo_sapiens.meme	M07701_2.00	ZNF765	CCTSGGCHRNGCMCTGSC	7113	97.27	7013	95.9	1.01	0.17	3.11e-06	-12.68	0.00331	-5.71	4.84e-06	-12.24
338	motif_db/CIS-BP_2.00/Homo_sapiens.meme	M04885_2.00	TFCP2L1	ACYRGTTYRRACYRGT	2667	36.47	2406	32.9	1.11	7.3	3.13e-06	-12.68	0.00333	-5.7	4.85e-06	-12.24
339	motif_db/CIS-BP_2.00/Homo_sapiens.meme	M07799_2.00	MYC	RRSCACGTGG	1775	24.27	1546	21.14	1.15	8.5	3.37e-06	-12.6	0.00359	-5.63	5.22e-06	-12.16
340	motif_db/CIS-BP_2.00/Homo_sapiens.meme	M05627_2.00	NR6A1	NYCAAGKTCAAGKTCAN	409	5.59	292	3.99	1.4	11	3.4e-06	-12.59	0.00363	-5.62	5.25e-06	-12.16
341	motif_db/CIS-BP_2.00/Homo_sapiens.meme	M07575_2.00	ZNF430	YYTMCARGGHGGCYDGCW	1822	24.91	1591	21.76	1.15	8.5	3.44e-06	-12.58	0.00366	-5.61	5.28e-06	-12.15
342	motif_db/CIS-BP_2.00/Homo_sapiens.meme	M07593_2.00	ZNF614	AGMTSARRTCABYMBTCWNRY	486	6.65	359	4.91	1.35	11	3.86e-06	-12.47	0.00411	-5.49	5.91e-06	-12.04
343	motif_db/CIS-BP_2.00/Homo_sapiens.meme	M04205_2.00	FIGLA	HMCACCTGB	2871	39.26	2609	35.68	1.1	8.1	4.11e-06	-12.4	0.00438	-5.43	6.29e-06	-11.98
344	motif_db/CIS-BP_2.00/Homo_sapiens.meme	M04653_2.00	ZNF345	NGTMCRGTTGYNYRKGTTGCAA	3464	47.37	3195	43.69	1.08	2.5	4.29e-06	-12.36	0.00457	-5.39	6.53e-06	-11.94
345	motif_db/CIS-BP_2.00/Homo_sapiens.meme	M04250_2.00	ATF2	NRTKACGTCAYN	2383	32.59	2134	29.18	1.12	7.6	4.51e-06	-12.31	0.00481	-5.34	6.86e-06	-11.89
346	motif_db/CIS-BP_2.00/Homo_sapiens.meme	M07763_2.00	ZNF705G	AGAGGTTTMTT	144	1.97	78	1.07	1.84	13	4.79e-06	-12.25	0.00511	-5.28	7.26e-06	-11.83
347	motif_db/CIS-BP_2.00/Homo_sapiens.meme	M08324_2.00	OSR2	VCDGCTNCTGN	5262	71.95	5017	68.6	1.05	6.5	5.04e-06	-12.2	0.00537	-5.23	7.62e-06	-11.78
348	motif_db/CIS-BP_2.00/Homo_sapiens.meme	M07589_2.00	ZNF189	YBKCYSTTCCHB	5664	77.45	5435	74.32	1.04	5.6	5.21e-06	-12.16	0.00555	-5.19	7.85e-06	-11.75
349	motif_db/CIS-BP_2.00/Homo_sapiens.meme	M08166_2.00	SOX13	DVACAATGGNN	1559	21.32	1346	18.41	1.16	9.5	5.53e-06	-12.11	0.00589	-5.13	8.31e-06	-11.7
350	motif_db/CIS-BP_2.00/Homo_sapiens.meme	M02487_2.00	(HMG20B)_(Mus_musculus)_(DBD_0.94)	NWATTATWTWN	1039	14.21	860	11.76	1.21	10	5.89e-06	-12.04	0.00628	-5.07	8.83e-06	-11.64
351	motif_db/CIS-BP_2.00/Homo_sapiens.meme	M07846_2.00	REST	TCCRTGGTGCTGAA	4021	54.98	3756	51.36	1.07	5.2	6.07e-06	-12.01	0.00646	-5.04	9.06e-06	-11.61
352	motif_db/CIS-BP_2.00/Homo_sapiens.meme	M05319_2.00	IRX3	WACATGAWWWWWCATGTW	3443	47.08	3180	43.48	1.08	4.8	6.72e-06	-11.91	0.00716	-4.94	1e-05	-11.51
353	motif_db/CIS-BP_2.00/Homo_sapiens.meme	M08131_2.00	CDX2	TTTTATKRCHB	352	4.81	247	3.38	1.42	12	6.83e-06	-11.89	0.00728	-4.92	1.02e-05	-11.5
354	motif_db/CIS-BP_2.00/Homo_sapiens.meme	M02775_2.00	TCF3	HRCACCTGBN	2816	38.51	2562	35.03	1.1	8.3	7.15e-06	-11.85	0.00762	-4.88	1.06e-05	-11.46
355	motif_db/CIS-BP_2.00/Homo_sapiens.meme	M05892_2.00	SOX6	WAACAATRGN	1667	22.8	1453	19.87	1.15	9.6	8.52e-06	-11.67	0.00907	-4.7	1.26e-05	-11.28
356	motif_db/CIS-BP_2.00/Homo_sapiens.meme	M03080_2.00	GSC2	NYTAATCCBH	4054	55.44	3794	51.88	1.07	7.3	8.73e-06	-11.65	0.0093	-4.68	1.29e-05	-11.26
357	motif_db/CIS-BP_2.00/Homo_sapiens.meme	M07570_2.00	ZNF302	AGTTGAGTGACTGYRGTT	6223	85.1	6032	82.48	1.03	0.95	1e-05	-11.51	0.0107	-4.54	1.47e-05	-11.13
358	motif_db/CIS-BP_2.00/Homo_sapiens.meme	M08093_2.00	ZNF24	CATTCATTCATTC	2022	27.65	1795	24.55	1.13	7.9	1.04e-05	-11.47	0.0111	-4.5	1.52e-05	-11.09
359	motif_db/CIS-BP_2.00/Homo_sapiens.meme	M08375_2.00	ZNF502	NNNNYNNNDDGCTACTGCAMHRGTCCH	1372	18.76	1176	16.08	1.17	8	1.06e-05	-11.46	0.0112	-4.49	1.54e-05	-11.08
360	motif_db/CIS-BP_2.00/Homo_sapiens.meme	M05595_2.00	ESRRB	BTCAAGGTCRH	133	1.82	72	0.98	1.84	14	1.07e-05	-11.44	0.0114	-4.47	1.56e-05	-11.07
361	motif_db/CIS-BP_2.00/Homo_sapiens.meme	M05153_2.00	LMX1B	VNWTTAATTAH	242	3.31	158	2.16	1.53	12	1.21e-05	-11.32	0.0129	-4.35	1.76e-05	-10.95
362	motif_db/CIS-BP_2.00/Homo_sapiens.meme	M03319_2.00	POU3F3	WWTATGCWAATTW	2421	33.11	2183	29.85	1.11	8.5	1.22e-05	-11.31	0.013	-4.34	1.77e-05	-10.94
363	motif_db/CIS-BP_2.00/Homo_sapiens.meme	M07760_2.00	ZNF254	GCTGGGAGGCTA	1899	25.97	1679	22.96	1.13	6.5	1.26e-05	-11.28	0.0134	-4.31	1.82e-05	-10.92
364	motif_db/CIS-BP_2.00/Homo_sapiens.meme	M08301_2.00	GTF3A	CTCCCATCC	4967	67.92	4726	64.62	1.05	6.1	1.35e-05	-11.22	0.0143	-4.25	1.94e-05	-10.85
365	motif_db/CIS-BP_2.00/Homo_sapiens.meme	M07833_2.00	FOSL1	BGGTGASTCAT	5793	79.22	5581	76.32	1.04	4.4	1.35e-05	-11.21	0.0144	-4.24	1.94e-05	-10.85
366	motif_db/CIS-BP_2.00/Homo_sapiens.meme	M02094_2.00	POU6F1	AYTAATTART	6350	86.83	6171	84.38	1.03	4.7	1.36e-05	-11.2	0.0145	-4.23	1.95e-05	-10.84
367	motif_db/CIS-BP_2.00/Homo_sapiens.meme	M04908_2.00	ISL1	YTAAKTGS	4039	55.23	3785	51.76	1.07	7.7	1.37e-05	-11.2	0.0146	-4.23	1.95e-05	-10.84
368	motif_db/CIS-BP_2.00/Homo_sapiens.meme	M01131_2.00	(POGK)_(PBM_CONSTRUCTS)_(DBD_0.73)	WWAGCCGA	799	10.93	647	8.85	1.23	10	1.42e-05	-11.16	0.0151	-4.19	2.02e-05	-10.81
369	motif_db/CIS-BP_2.00/Homo_sapiens.meme	M04177_2.00	NHLH2	RGGNCGCAGCTGCGYCMC	1795	24.55	1581	21.62	1.14	6.1	1.45e-05	-11.14	0.0155	-4.17	2.06e-05	-10.79
370	motif_db/CIS-BP_2.00/Homo_sapiens.meme	M03310_2.00	POU4F2	CTMATTAATTATKCAH	4320	59.07	4069	55.64	1.06	6.1	1.46e-05	-11.14	0.0155	-4.17	2.06e-05	-10.79
371	motif_db/CIS-BP_2.00/Homo_sapiens.meme	M08292_2.00	ZNF175	TGTATTCYTTRTYDTGTGTGG	2495	34.12	2258	30.88	1.1	5.2	1.54e-05	-11.08	0.0164	-4.11	2.18e-05	-10.73
372	motif_db/CIS-BP_2.00/Homo_sapiens.meme	M07944_2.00	SPI1	NRAAAGAGGAASTGARAVH	4781	65.38	4539	62.07	1.05	5.2	1.7e-05	-10.98	0.0181	-4.01	2.39e-05	-10.64
373	motif_db/CIS-BP_2.00/Homo_sapiens.meme	M07635_2.00	ZNF570	DWRTTTTCTTKTAHKWTRTYT	6980	95.45	6867	93.9	1.02	2.9	1.81e-05	-10.92	0.0193	-3.95	2.54e-05	-10.58
374	motif_db/CIS-BP_2.00/Homo_sapiens.meme	M08320_2.00	IKZF3	TTCCCNNSS	4774	65.28	4533	61.99	1.05	7	1.85e-05	-10.9	0.0197	-3.93	2.59e-05	-10.56
375	motif_db/CIS-BP_2.00/Homo_sapiens.meme	M07703_2.00	ZNF777	CCGACGK	6200	84.78	6014	82.24	1.03	1.9	1.86e-05	-10.89	0.0199	-3.92	2.61e-05	-10.55
376	motif_db/CIS-BP_2.00/Homo_sapiens.meme	M08231_2.00	TBP	TATTTGCATA	6005	82.11	5808	79.42	1.03	6.2	1.95e-05	-10.84	0.0208	-3.87	2.72e-05	-10.51
377	motif_db/CIS-BP_2.00/Homo_sapiens.meme	M03195_2.00	PKNOX2	TGACAGGTGTCA	475	6.5	360	4.92	1.32	10	2.37e-05	-10.65	0.0252	-3.68	3.29e-05	-10.32
378	motif_db/CIS-BP_2.00/Homo_sapiens.meme	M05829_2.00	SKOR1	VKTAATTACMKNWN	6008	82.16	5814	79.5	1.03	4.6	2.5e-05	-10.6	0.0267	-3.62	3.47e-05	-10.27
379	motif_db/CIS-BP_2.00/Homo_sapiens.meme	M04214_2.00	TCF4	VCACCTGC	500	6.84	383	5.24	1.3	12	2.76e-05	-10.5	0.0294	-3.53	3.82e-05	-10.17
380	motif_db/CIS-BP_2.00/Homo_sapiens.meme	M00260_2.00	ARX	DMTAATTARTN	5641	77.14	5431	74.27	1.04	5.8	2.79e-05	-10.49	0.0297	-3.52	3.84e-05	-10.17
381	motif_db/CIS-BP_2.00/Homo_sapiens.meme	M04893_2.00	UBP1	DRCCGGTTYRRACCGGHY	4245	58.05	4003	54.74	1.06	5.3	2.92e-05	-10.44	0.0311	-3.47	4.02e-05	-10.12
382	motif_db/CIS-BP_2.00/Homo_sapiens.meme	M08372_2.00	ZNF140	CAATTCYGCTCHNNBHYNNNNNYC	5464	74.72	5248	71.76	1.04	4.5	2.96e-05	-10.43	0.0315	-3.46	4.06e-05	-10.11
383	motif_db/CIS-BP_2.00/Homo_sapiens.meme	M05896_2.00	SOX17	RAACAATRGN	1149	15.71	978	13.37	1.17	10	3.32e-05	-10.31	0.0353	-3.34	4.54e-05	-10
384	motif_db/CIS-BP_2.00/Homo_sapiens.meme	M08368_2.00	ZNF563	STCMTBDCHGGCARCTGY	6684	91.4	6542	89.46	1.02	3.3	3.66e-05	-10.22	0.039	-3.24	5e-05	-9.9
385	motif_db/CIS-BP_2.00/Homo_sapiens.meme	M07780_2.00	ZNF2	AGCGCCMCC	67	0.92	28	0.38	2.34	16	3.7e-05	-10.2	0.0394	-3.23	5.04e-05	-9.9
386	motif_db/CIS-BP_2.00/Homo_sapiens.meme	M03144_2.00	BARX1	TAATBGNTWTTTAATBG	3193	43.66	2956	40.42	1.08	6.9	3.85e-05	-10.17	0.041	-3.19	5.23e-05	-9.86
387	motif_db/CIS-BP_2.00/Homo_sapiens.meme	M07661_2.00	ZNF707	ACCCCACTCCTGGTM	7097	97.05	7008	95.83	1.01	1.4	4.17e-05	-10.09	0.0444	-3.11	5.65e-05	-9.78
388	motif_db/CIS-BP_2.00/Homo_sapiens.meme	M00335_2.00	PAX6	YRVNNNNN	3354	45.86	3117	42.62	1.08	5.4	4.26e-05	-10.06	0.0454	-3.09	5.76e-05	-9.76
389	motif_db/CIS-BP_2.00/Homo_sapiens.meme	M01812_2.00	(CREB3L2)_(Mus_musculus)_(DBD_1.00)	HCACGTGGC	3258	44.55	3022	41.32	1.08	6.5	4.32e-05	-10.05	0.046	-3.08	5.82e-05	-9.75
390	motif_db/CIS-BP_2.00/Homo_sapiens.meme	M05753_2.00	SOX30	NAACAATG	112	1.53	61	0.83	1.82	11	5.92e-05	-9.73	0.0631	-2.76	7.96e-05	-9.44
391	motif_db/CIS-BP_2.00/Homo_sapiens.meme	M00362_2.00	POU6F2	VCTAATTAAN	6493	88.79	6340	86.69	1.02	4.6	6.3e-05	-9.67	0.0671	-2.7	8.45e-05	-9.38
392	motif_db/CIS-BP_2.00/Homo_sapiens.meme	M08090_2.00	ZNF384	TTTTTTTTKWNH	1389	18.99	1212	16.57	1.15	9.7	7.03e-05	-9.56	0.0749	-2.59	9.4e-05	-9.27
393	motif_db/CIS-BP_2.00/Homo_sapiens.meme	M04229_2.00	CREM	SRTGACGTCABN	4610	63.04	4387	59.99	1.05	5.6	8.06e-05	-9.43	0.0859	-2.45	0.000108	-9.14
394	motif_db/CIS-BP_2.00/Homo_sapiens.meme	M07713_2.00	ZNF585A	TCTGTWYTC	2314	31.64	2104	28.77	1.1	8.7	8.35e-05	-9.39	0.0889	-2.42	0.000111	-9.1
395	motif_db/CIS-BP_2.00/Homo_sapiens.meme	M04066_2.00	TFAP4	AHCATATGDT	673	9.2	547	7.48	1.23	10	9.17e-05	-9.3	0.0977	-2.33	0.000122	-9.01
396	motif_db/CIS-BP_2.00/Homo_sapiens.meme	M08270_2.00	ZSCAN31	DDVTTAATTGRTTKTT	1688	23.08	1501	20.53	1.12	8.9	9.75e-05	-9.24	0.104	-2.27	0.000129	-8.96
397	motif_db/CIS-BP_2.00/Homo_sapiens.meme	M03016_2.00	FOXJ2	GTAAACARTMAACA	6149	84.08	5981	81.79	1.03	3.2	0.000121	-9.02	0.128	-2.05	0.000159	-8.75
398	motif_db/CIS-BP_2.00/Homo_sapiens.meme	M03178_2.00	PKNOX1	TGACAGSTGTCA	484	6.62	379	5.18	1.28	9.8	0.000129	-8.95	0.138	-1.98	0.00017	-8.68
399	motif_db/CIS-BP_2.00/Homo_sapiens.meme	M05805_2.00	TBX6	DAGGTGTKAW	2174	29.73	1974	26.99	1.1	8.8	0.000131	-8.94	0.139	-1.97	0.000172	-8.67
400	motif_db/CIS-BP_2.00/Homo_sapiens.meme	M07623_2.00	ZNF764	GKCTARTAGAGCTGGGYTGCA	5259	71.91	5058	69.16	1.04	1.5	0.000143	-8.85	0.152	-1.88	0.000187	-8.58
401	motif_db/CIS-BP_2.00/Homo_sapiens.meme	M04009_2.00	CEBPE	NVTTRCGCAAYN	161	2.2	102	1.39	1.57	12	0.000146	-8.83	0.155	-1.86	0.000191	-8.56
402	motif_db/CIS-BP_2.00/Homo_sapiens.meme	M07719_2.00	ZNF257	NDGAGGCRA	6972	95.34	6873	93.98	1.01	4.5	0.000154	-8.78	0.164	-1.81	0.000201	-8.51
403	motif_db/CIS-BP_2.00/Homo_sapiens.meme	M08259_2.00	ZNF322	GWGCCTGSTACWSWGCC	6903	94.39	6796	92.93	1.02	3.4	0.000159	-8.75	0.169	-1.78	0.000206	-8.49
404	motif_db/CIS-BP_2.00/Homo_sapiens.meme	M05313_2.00	TGIF2LY	TGACAGCTGTCA	2292	31.34	2094	28.63	1.09	7.1	0.000189	-8.58	0.201	-1.6	0.000245	-8.31
405	motif_db/CIS-BP_2.00/Homo_sapiens.meme	M03335_2.00	IRF8	HCGAAACCGAAACY	5325	72.82	5130	70.15	1.04	3	0.00019	-8.57	0.203	-1.6	0.000246	-8.31
406	motif_db/CIS-BP_2.00/Homo_sapiens.meme	M05619_2.00	NR1I3	AAAGTTCAY	2825	38.63	2617	35.79	1.08	8.2	0.000199	-8.52	0.212	-1.55	0.000257	-8.27
407	motif_db/CIS-BP_2.00/Homo_sapiens.meme	M03226_2.00	ALX1	NTAATTRRATTAN	3733	51.05	3519	48.12	1.06	7.4	0.000213	-8.45	0.227	-1.48	0.000275	-8.2
408	motif_db/CIS-BP_2.00/Homo_sapiens.meme	M04485_2.00	ZIC1	BACCCCCCGCTGYGC	4835	66.12	4632	63.34	1.04	3.8	0.000236	-8.35	0.252	-1.38	0.000304	-8.1
409	motif_db/CIS-BP_2.00/Homo_sapiens.meme	M04568_2.00	HIC1	BRTGCCMMCB	127	1.74	77	1.05	1.64	13	0.00026	-8.25	0.277	-1.28	0.000333	-8.01
410	motif_db/CIS-BP_2.00/Homo_sapiens.meme	M07930_2.00	CTCFL	RGCGCCCCCTGSYGG	40	0.55	14	0.19	2.73	17	0.000262	-8.25	0.279	-1.28	0.000335	-8
411	motif_db/CIS-BP_2.00/Homo_sapiens.meme	M00111_2.00	(TFAP2D)_(Mus_musculus)_(DBD_0.80)	HGCCBBVGGS	6590	90.11	6459	88.32	1.02	4.5	0.000263	-8.24	0.28	-1.27	0.000335	-8
412	motif_db/CIS-BP_2.00/Homo_sapiens.meme	M07663_2.00	ZNF101	DGAYACWGGGGCMAC	3346	45.75	3137	42.9	1.07	6.3	0.000268	-8.23	0.285	-1.25	0.000341	-7.98
413	motif_db/CIS-BP_2.00/Homo_sapiens.meme	M07702_2.00	ZNF124	CTTYTTCCTTGS	6879	94.07	6774	92.63	1.02	3.1	0.000277	-8.19	0.294	-1.22	0.000351	-7.95
414	motif_db/CIS-BP_2.00/Homo_sapiens.meme	M01026_2.00	SOX4	AACAAAGG	4445	60.78	4239	57.97	1.05	7.1	0.000279	-8.19	0.297	-1.21	0.000353	-7.95
415	motif_db/CIS-BP_2.00/Homo_sapiens.meme	M08060_2.00	(MYF5)_(Mus_musculus)_(DBD_0.90)	NRNRRCAGCTGSN	2790	38.15	2588	35.39	1.08	7.8	0.000283	-8.17	0.302	-1.2	0.000358	-7.94
416	motif_db/CIS-BP_2.00/Homo_sapiens.meme	M07742_2.00	ZNF442	ACTCTTTCTCTRCTGCAAYACCTGCTGTY	792	10.83	667	9.12	1.19	1.7	0.000309	-8.08	0.33	-1.11	0.00039	-7.85
417	motif_db/CIS-BP_2.00/Homo_sapiens.meme	M00161_2.00	(FOXJ1)_(Mus_musculus)_(DBD_1.00)	NRTAAACAAANN	5481	74.95	5298	72.45	1.03	6.6	0.000315	-8.06	0.335	-1.09	0.000395	-7.84
418	motif_db/CIS-BP_2.00/Homo_sapiens.meme	M07653_2.00	ZNF354B	ATWTAKYCCATT	5918	80.92	5751	78.64	1.03	5.7	0.000315	-8.06	0.336	-1.09	0.000395	-7.84
419	motif_db/CIS-BP_2.00/Homo_sapiens.meme	M04609_2.00	ZNF501	VGGCGACGCGAACAC	4896	66.95	4699	64.26	1.04	4	0.000322	-8.04	0.343	-1.07	0.000404	-7.82
420	motif_db/CIS-BP_2.00/Homo_sapiens.meme	M04479_2.00	ZNF660	AHTGATDVCCCAYCCTAY	645	8.82	532	7.27	1.21	9.9	0.000329	-8.02	0.35	-1.05	0.000411	-7.8
421	motif_db/CIS-BP_2.00/Homo_sapiens.meme	M08234_2.00	ZNF416	GTCAACTTGACTGGGCCA	1767	24.16	1594	21.8	1.11	3.7	0.000361	-7.93	0.384	-0.96	0.00045	-7.71
422	motif_db/CIS-BP_2.00/Homo_sapiens.meme	M03516_2.00	SOX7	AACAATRWNCAKTGTT	1296	17.72	1144	15.64	1.13	6.5	0.000404	-7.81	0.431	-0.84	0.000502	-7.6
423	motif_db/CIS-BP_2.00/Homo_sapiens.meme	M03444_2.00	PAX9	KKCASTCAWGCGTGACS	290	3.97	216	2.95	1.34	10	0.00047	-7.66	0.5	-0.69	0.000582	-7.45
424	motif_db/CIS-BP_2.00/Homo_sapiens.meme	M04459_2.00	ZSCAN5	NHGTCCCYMCCCAAADCY	92	1.26	52	0.71	1.75	14	0.000511	-7.58	0.544	-0.61	0.000632	-7.37
425	motif_db/CIS-BP_2.00/Homo_sapiens.meme	M07834_2.00	JUN	CATTCYWDNVBGRTGASKYM	6776	92.66	6667	91.17	1.02	4.4	0.000524	-7.55	0.558	-0.58	0.000647	-7.34
426	motif_db/CIS-BP_2.00/Homo_sapiens.meme	M07830_2.00	CEBPB	NNDRTTRTGCAATM	2274	31.1	2092	28.61	1.09	8.3	0.000536	-7.53	0.571	-0.56	0.00066	-7.32
427	motif_db/CIS-BP_2.00/Homo_sapiens.meme	M03501_2.00	SOX9	DAACAATRG	1000	13.67	868	11.87	1.15	10	0.000584	-7.44	0.622	-0.47	0.000718	-7.24
428	motif_db/CIS-BP_2.00/Homo_sapiens.meme	M05681_2.00	RXRB	RRGGTCAAAGGTCAN	6166	84.32	6019	82.31	1.02	2.6	0.000601	-7.42	0.64	-0.45	0.000737	-7.21
429	motif_db/CIS-BP_2.00/Homo_sapiens.meme	M05369_2.00	ARGFX	KYTAATTAGH	6175	84.44	6029	82.44	1.02	4.8	0.000627	-7.37	0.668	-0.4	0.000767	-7.17
430	motif_db/CIS-BP_2.00/Homo_sapiens.meme	M02460_2.00	GMEB1	NNACGYNNN	67	0.92	34	0.46	1.94	13	0.000641	-7.35	0.683	-0.38	0.000782	-7.15
431	motif_db/CIS-BP_2.00/Homo_sapiens.meme	M08108_2.00	TFDP1	VSGCGGGAAVN	6717	91.85	6606	90.33	1.02	3	0.000701	-7.26	0.746	-0.29	0.000852	-7.07
432	motif_db/CIS-BP_2.00/Homo_sapiens.meme	M04152_2.00	HEY1	GRCACGTGCM	148	2.02	98	1.34	1.51	13	0.000789	-7.15	0.84	-0.17	0.000957	-6.95
433	motif_db/CIS-BP_2.00/Homo_sapiens.meme	M02097_2.00	(SEBOX)_(Mus_musculus)_(DBD_0.79)	NMTTAATTAR	5449	74.51	5280	72.2	1.03	5.8	0.000838	-7.08	0.892	-0.11	0.00101	-6.89
434	motif_db/CIS-BP_2.00/Homo_sapiens.meme	M03171_2.00	TGIF2LX	TGACAGSTGTCA	1560	21.33	1407	19.24	1.11	6.6	0.000886	-7.03	0.944	-0.06	0.00107	-6.84
435	motif_db/CIS-BP_2.00/Homo_sapiens.meme	M03315_2.00	POU3F1	WTATGCWAATKW	783	10.71	669	9.15	1.17	11	0.000886	-7.03	0.944	-0.06	0.00107	-6.84
436	motif_db/CIS-BP_2.00/Homo_sapiens.meme	M08351_2.00	ZBTB42	CRCAKCTGG	4950	67.69	4771	65.24	1.04	6.4	0.000911	-7	0.97	-0.03	0.0011	-6.82
437	motif_db/CIS-BP_2.00/Homo_sapiens.meme	M03312_2.00	POU4F1	ATGMATAATTAATG	1658	22.67	1502	20.54	1.1	9	0.000921	-6.99	0.981	-0.02	0.0011	-6.81
438	motif_db/CIS-BP_2.00/Homo_sapiens.meme	M03483_2.00	SOX8	AACAATRTGCAGTGTT	479	6.55	391	5.35	1.22	7.5	0.00117	-6.75	1.24	0.22	0.0014	-6.57
439	motif_db/CIS-BP_2.00/Homo_sapiens.meme	M03223_2.00	TGIF1	TGACAGCTGTCA	2052	28.06	1888	25.82	1.09	4.8	0.00119	-6.73	1.27	0.24	0.00142	-6.56
440	motif_db/CIS-BP_2.00/Homo_sapiens.meme	M01722_2.00	(HEYL)_(Mus_musculus)_(DBD_0.91)	RCACGTGNC	265	3.62	201	2.75	1.32	12	0.00149	-6.51	1.59	0.46	0.00177	-6.33
441	motif_db/CIS-BP_2.00/Homo_sapiens.meme	M03570_2.00	TBX1	AGGTGTGAAAAAAGGTGTGA	5444	74.44	5285	72.27	1.03	0.48	0.00156	-6.46	1.66	0.51	0.00186	-6.29
442	motif_db/CIS-BP_2.00/Homo_sapiens.meme	M04158_2.00	NPAS2	NRCACGTGKY	221	3.02	163	2.23	1.35	12	0.00158	-6.45	1.68	0.52	0.00187	-6.28
443	motif_db/CIS-BP_2.00/Homo_sapiens.meme	M08239_2.00	ZNF574	SGGCCKCTCTAGSMNBSBNB	6734	92.08	6633	90.7	1.02	2.6	0.00159	-6.44	1.7	0.53	0.00188	-6.27
444	motif_db/CIS-BP_2.00/Homo_sapiens.meme	M05545_2.00	IRF2	CGAAASYGAAAS	5992	81.94	5852	80.02	1.02	5.7	0.0017	-6.38	1.81	0.59	0.00201	-6.21
445	motif_db/CIS-BP_2.00/Homo_sapiens.meme	M02020_2.00	GCM1	NRTRCGGGY	162	2.22	113	1.55	1.43	12	0.0017	-6.38	1.81	0.6	0.00201	-6.21
446	motif_db/CIS-BP_2.00/Homo_sapiens.meme	M00116_2.00	(ARID5A)_(Mus_musculus)_(DBD_1.00)	NMAATATTWHN	5760	78.76	5612	76.74	1.03	5.5	0.00173	-6.36	1.85	0.61	0.00204	-6.2
447	motif_db/CIS-BP_2.00/Homo_sapiens.meme	M07826_2.00	FOS	GATGASTCAYWSN	6982	95.47	6904	94.41	1.01	2.9	0.00182	-6.31	1.94	0.66	0.00214	-6.15
448	motif_db/CIS-BP_2.00/Homo_sapiens.meme	M07638_2.00	ZNF483	TGCAGCTCYCTSHSN	6969	95.3	6890	94.22	1.01	1.4	0.00189	-6.27	2.02	0.7	0.00222	-6.11
449	motif_db/CIS-BP_2.00/Homo_sapiens.meme	M04139_2.00	HES6	RACACGTGCC	154	2.11	107	1.46	1.44	12	0.00199	-6.22	2.12	0.75	0.00233	-6.06
450	motif_db/CIS-BP_2.00/Homo_sapiens.meme	M01983_2.00	(FOXB2)_(Mus_musculus)_(DBD_0.93)	TRTTTACWYW	512	7	426	5.83	1.2	9.6	0.00205	-6.19	2.18	0.78	0.00239	-6.04
451	motif_db/CIS-BP_2.00/Homo_sapiens.meme	M07692_2.00	ZNF567	CATCTSWKKGTCTDYTTBTRTWKWBTKTTT	706	9.65	606	8.29	1.16	10	0.00208	-6.18	2.22	0.8	0.00242	-6.02
452	motif_db/CIS-BP_2.00/Homo_sapiens.meme	M03581_2.00	CPEB1	AATAAAAA	6007	82.14	5871	80.28	1.02	6.2	0.00213	-6.15	2.27	0.82	0.00247	-6
453	motif_db/CIS-BP_2.00/Homo_sapiens.meme	M02184_2.00	(HHEX)_(Caenorhabditis_elegans)_(DBD_0.77)	NNNATTRNNN	492	6.73	408	5.58	1.21	7.9	0.00213	-6.15	2.27	0.82	0.00247	-6
454	motif_db/CIS-BP_2.00/Homo_sapiens.meme	M07781_2.00	ZNF8	RYGTACCACAKT	371	5.07	298	4.07	1.24	11	0.00217	-6.13	2.31	0.84	0.00251	-5.99
455	motif_db/CIS-BP_2.00/Homo_sapiens.meme	M01913_2.00	DNMT1	NNNNKCGGNN	3155	43.14	2985	40.82	1.06	7.5	0.00232	-6.07	2.47	0.9	0.00267	-5.93
456	motif_db/CIS-BP_2.00/Homo_sapiens.meme	M07738_2.00	ZNF649	TTATAT	7136	97.58	7079	96.8	1.01	4.5	0.00251	-5.99	2.67	0.98	0.00289	-5.85
457	motif_db/CIS-BP_2.00/Homo_sapiens.meme	M07598_2.00	ZNF7	CWGACAAYWVCAAGTGBTGRC	58	0.79	31	0.42	1.84	14	0.0027	-5.91	2.88	1.06	0.0031	-5.78
458	motif_db/CIS-BP_2.00/Homo_sapiens.meme	M00497_2.00	(NKX2-6)_(Mus_musculus)_(DBD_0.93)	HBAAGTRBN	836	11.43	731	10	1.14	8	0.00271	-5.91	2.88	1.06	0.0031	-5.78
459	motif_db/CIS-BP_2.00/Homo_sapiens.meme	M05687_2.00	PAX1	KCASTSAWGCGTGACGR	110	1.5	72	0.98	1.52	14	0.00282	-5.87	3	1.1	0.00322	-5.74
460	motif_db/CIS-BP_2.00/Homo_sapiens.meme	M00968_2.00	MTF2	HMCCCGMCGGN	122	1.67	82	1.12	1.48	14	0.00292	-5.84	3.11	1.13	0.00332	-5.71
461	motif_db/CIS-BP_2.00/Homo_sapiens.meme	M08077_2.00	(NFE2L2)_(Mus_musculus)_(DBD_0.95)	MASNATGACTCAGCA	1407	19.24	1277	17.46	1.1	8.7	0.00293	-5.83	3.12	1.14	0.00333	-5.71
462	motif_db/CIS-BP_2.00/Homo_sapiens.meme	M03464_2.00	RUNX3	WRACCGCAAACCGCAR	6018	82.29	5888	80.51	1.02	2.5	0.00305	-5.79	3.25	1.18	0.00347	-5.66
463	motif_db/CIS-BP_2.00/Homo_sapiens.meme	M08165_2.00	SOX10	NDAACAAAGVN	91	1.24	57	0.78	1.59	12	0.00311	-5.77	3.31	1.2	0.00352	-5.65
464	motif_db/CIS-BP_2.00/Homo_sapiens.meme	M04531_2.00	ZNF597	VGCCGCCATYTTGN	2729	37.32	2569	35.13	1.06	6	0.00311	-5.77	3.32	1.2	0.00352	-5.65
465	motif_db/CIS-BP_2.00/Homo_sapiens.meme	M05042_2.00	NKX2-3	SKBAAGTGSN	5152	70.45	4999	68.36	1.03	7	0.00319	-5.75	3.4	1.22	0.0036	-5.63
466	motif_db/CIS-BP_2.00/Homo_sapiens.meme	M07745_2.00	ZNF480	HMCWCATTCCYH	1270	17.37	1148	15.7	1.11	9.9	0.00353	-5.65	3.76	1.32	0.00397	-5.53
467	motif_db/CIS-BP_2.00/Homo_sapiens.meme	M07615_2.00	ZNF641	ACCCCCCCA	5924	81.01	5793	79.22	1.02	1.7	0.00354	-5.64	3.77	1.33	0.00397	-5.53
468	motif_db/CIS-BP_2.00/Homo_sapiens.meme	M08356_2.00	ZFP82	AGAATTAGTGAACTGGAAGAT	4231	57.86	4070	55.65	1.04	4.2	0.00379	-5.58	4.03	1.39	0.00424	-5.46
469	motif_db/CIS-BP_2.00/Homo_sapiens.meme	M03215_2.00	EVX2	NNTAATKABB	6819	93.24	6734	92.08	1.01	5.3	0.00385	-5.56	4.1	1.41	0.0043	-5.45
470	motif_db/CIS-BP_2.00/Homo_sapiens.meme	M04008_2.00	NFE2L1	ATGACTCAY	6606	90.33	6507	88.98	1.02	3.9	0.00389	-5.55	4.14	1.42	0.00434	-5.44
471	motif_db/CIS-BP_2.00/Homo_sapiens.meme	M00808_2.00	(MYPOP)_(Mus_musculus)_(DBD_0.96)	NWTTGCGCCR	43	0.59	21	0.29	2	15	0.004	-5.52	4.27	1.45	0.00446	-5.41
472	motif_db/CIS-BP_2.00/Homo_sapiens.meme	M02966_2.00	ELF4	AACCCGGAAGTR	1406	19.23	1281	17.52	1.1	7.8	0.00405	-5.51	4.31	1.46	0.0045	-5.4
473	motif_db/CIS-BP_2.00/Homo_sapiens.meme	M08184_2.00	BACH1	GTCACGTG	6797	92.94	6711	91.77	1.01	4.3	0.00407	-5.5	4.33	1.47	0.00451	-5.4
474	motif_db/CIS-BP_2.00/Homo_sapiens.meme	M04285_2.00	JDP2	SATGASTCATS	299	4.09	238	3.25	1.26	11	0.00414	-5.49	4.41	1.48	0.00458	-5.39
475	motif_db/CIS-BP_2.00/Homo_sapiens.meme	M08359_2.00	ZNF329	CTGGATCMAGCCNTDCCTGAA	2296	31.4	2149	29.39	1.07	6.4	0.00433	-5.44	4.62	1.53	0.00478	-5.34
476	motif_db/CIS-BP_2.00/Homo_sapiens.meme	M08394_2.00	GLI4	TKRGCHTGGCATTCAAGGCCY	5265	72	5120	70.01	1.03	0.21	0.00434	-5.44	4.62	1.53	0.00478	-5.34
477	motif_db/CIS-BP_2.00/Homo_sapiens.meme	M05104_2.00	HOXD9	NTTTTATKRC	643	8.79	556	7.6	1.16	11	0.00476	-5.35	5.07	1.62	0.00523	-5.25
478	motif_db/CIS-BP_2.00/Homo_sapiens.meme	M01247_2.00	DUXA	HTGATTRRH	230	3.15	178	2.43	1.29	10	0.00518	-5.26	5.52	1.71	0.00568	-5.17
479	motif_db/CIS-BP_2.00/Homo_sapiens.meme	M02753_2.00	TFAP2B	HGCCCBVRGGCA	7118	97.33	7064	96.6	1.01	1.5	0.00528	-5.24	5.62	1.73	0.00578	-5.15
480	motif_db/CIS-BP_2.00/Homo_sapiens.meme	M05747_2.00	NFIB	NTTGGCNNNDTGCCARN	3980	54.42	3826	52.32	1.04	5.3	0.00561	-5.18	5.97	1.79	0.00612	-5.1
481	motif_db/CIS-BP_2.00/Homo_sapiens.meme	M05112_2.00	HOXD10	DTTTTATKRC	900	12.31	801	10.95	1.12	11	0.00573	-5.16	6.11	1.81	0.00625	-5.08
482	motif_db/CIS-BP_2.00/Homo_sapiens.meme	M08076_2.00	CEBPA	DRTTRTGCAAT	2762	37.77	2614	35.74	1.06	8	0.00585	-5.14	6.23	1.83	0.00636	-5.06
483	motif_db/CIS-BP_2.00/Homo_sapiens.meme	M04414_2.00	ZNF174	DGNCRRTCACTYGCCM	6397	87.47	6293	86.05	1.02	1.9	0.00598	-5.12	6.36	1.85	0.00648	-5.04
484	motif_db/CIS-BP_2.00/Homo_sapiens.meme	M02733_2.00	EHF	ACCCGGAAGT	812	11.1	718	9.82	1.13	9.8	0.00598	-5.12	6.37	1.85	0.00648	-5.04
485	motif_db/CIS-BP_2.00/Homo_sapiens.meme	M04129_2.00	CLOCK	RMCACGTGYN	192	2.63	146	2	1.31	13	0.00658	-5.02	7.01	1.95	0.00711	-4.95
486	motif_db/CIS-BP_2.00/Homo_sapiens.meme	M00417_2.00	(OTP)_(Mus_musculus)_(DBD_1.00)	NYTAATTR	5260	71.93	5123	70.05	1.03	5.9	0.0066	-5.02	7.03	1.95	0.00712	-4.94
487	motif_db/CIS-BP_2.00/Homo_sapiens.meme	M08390_2.00	ZSCAN5C	GYTTTRTTRACTCAC	56	0.77	32	0.44	1.73	14	0.00673	-5	7.17	1.97	0.00725	-4.93
488	motif_db/CIS-BP_2.00/Homo_sapiens.meme	M02796_2.00	NHLH1	CGCAGCTGCS	6525	89.22	6429	87.91	1.01	2.9	0.00677	-5	7.21	1.98	0.00728	-4.92
489	motif_db/CIS-BP_2.00/Homo_sapiens.meme	M00271_2.00	TPRX1	NWAATCY	127	1.74	90	1.23	1.41	8.5	0.00682	-4.99	7.26	1.98	0.00731	-4.92
490	motif_db/CIS-BP_2.00/Homo_sapiens.meme	M07604_2.00	ZNF222	GCTGASATB	6680	91.34	6593	90.15	1.01	5.1	0.00705	-4.96	7.5	2.02	0.00754	-4.89
491	motif_db/CIS-BP_2.00/Homo_sapiens.meme	M05739_2.00	SKOR2	VTTAATTACMGHTN	231	3.16	181	2.48	1.27	12	0.00712	-4.94	7.58	2.03	0.0076	-4.88
492	motif_db/CIS-BP_2.00/Homo_sapiens.meme	M07709_2.00	ZKSCAN5	TCACCTCCY	207	2.83	160	2.19	1.29	13	0.00746	-4.9	7.94	2.07	0.00795	-4.84
493	motif_db/CIS-BP_2.00/Homo_sapiens.meme	M04813_2.00	FOXO3	HTCCCCACACV	4273	58.43	4127	56.43	1.04	6.5	0.00766	-4.87	8.15	2.1	0.00814	-4.81
494	motif_db/CIS-BP_2.00/Homo_sapiens.meme	M01661_2.00	(ARID5B)_(Mus_musculus)_(DBD_1.00)	NAATAYNN	120	1.64	85	1.16	1.41	9.3	0.00829	-4.79	8.83	2.18	0.0088	-4.73
495	motif_db/CIS-BP_2.00/Homo_sapiens.meme	M03512_2.00	TCF7L1	AAAGATCAAAGG	525	7.18	452	6.18	1.16	11	0.00853	-4.76	9.09	2.21	0.00904	-4.71
496	motif_db/CIS-BP_2.00/Homo_sapiens.meme	M00253_2.00	FOXC1	NGWATAAWHAA	6121	83.7	6012	82.21	1.02	6.3	0.00877	-4.74	9.34	2.23	0.00927	-4.68
497	motif_db/CIS-BP_2.00/Homo_sapiens.meme	M07772_2.00	ZNF550	TGCCCTAGCMBWSRYTYY	286	3.91	232	3.17	1.23	11	0.00883	-4.73	9.4	2.24	0.00931	-4.68
