# Supplementary material for: Cervicovaginal microbiome alters transcriptomic and epigenomic signatures across cervicovaginal epithelial barriers
Source: Research Square preprint supplement (doi:10.21203/rs.3.rs-6171614/v1), 2025-05-07
Supplement: Supplementary file 5 [file 5d840ce8632e1a81f40c72aa.xlsx]

## Sheet: TOC
Anti-microbial peptides Gene Expression
Table of Contents
Supplemental Table 7a	Ecto GV vs NYC sups
Supplemental Table 7b	Ecto LC vs NYC sups
Supplemental Table 7c	Endo GV vs NYC sups
Supplemental Table 7d	Endo LC vs NYC sups
Supplemental Table 7e	Vaginal GV vs NYC sups
Supplemental Table 7f	Vaginal LC vs NYC sups

## Sheet: Table 7a
ensembl_gene_id	gene_name	description	chromosome_name	log2FoldChange	padj
ENSG00000115009	CCL20	C-C motif chemokine ligand 20 [Source:HGNC Symbol;Acc:HGNC:10619]	2	0.821854	8.44674e-08
ENSG00000124107	SLPI	secretory leukocyte peptidase inhibitor [Source:HGNC Symbol;Acc:HGNC:11092]	20	0.299077	0.0294588
ENSG00000148346	LCN2	lipocalin 2 [Source:HGNC Symbol;Acc:HGNC:6526]	9	0.295457	0.0113099
ENSG00000143546	S100A8	S100 calcium binding protein A8 [Source:HGNC Symbol;Acc:HGNC:10498]	1	0.860969	3.1873e-06

## Sheet: Table 7b
ensembl_gene_id	gene_name	description	log2FoldChange	padj
ENSG00000115009	CCL20	C-C motif chemokine ligand 20 [Source:HGNC Symbol;Acc:HGNC:10619]	-0.139103	0.483302
ENSG00000124107	SLPI	secretory leukocyte peptidase inhibitor [Source:HGNC Symbol;Acc:HGNC:11092]	0.742298	2.72281e-16
ENSG00000148346	LCN2	lipocalin 2 [Source:HGNC Symbol;Acc:HGNC:6526]	0.562405	8.4457e-12
ENSG00000143546	S100A8	S100 calcium binding protein A8 [Source:HGNC Symbol;Acc:HGNC:10498]	-0.482433	0.00810553

## Sheet: Table 7c
ensembl_gene_id	gene_name	description	log2FoldChange	padj
ENSG00000115009	CCL20	C-C motif chemokine ligand 20 [Source:HGNC Symbol;Acc:HGNC:10619]	3.15273	3.82712e-85
ENSG00000124107	SLPI	secretory leukocyte peptidase inhibitor [Source:HGNC Symbol;Acc:HGNC:11092]	0.352052	0.000484396
ENSG00000148346	LCN2	lipocalin 2 [Source:HGNC Symbol;Acc:HGNC:6526]	1.39446	6.49863e-60
ENSG00000143546	S100A8	S100 calcium binding protein A8 [Source:HGNC Symbol;Acc:HGNC:10498]	0.952032	4.23652e-08

## Sheet: Table 7d
ensembl_gene_id	gene_name	description	log2FoldChange	padj
ENSG00000115009	CCL20	C-C motif chemokine ligand 20 [Source:HGNC Symbol;Acc:HGNC:10619]	0.904153	5.64433e-07
ENSG00000124107	SLPI	secretory leukocyte peptidase inhibitor [Source:HGNC Symbol;Acc:HGNC:11092]	-0.00567276	0.977965
ENSG00000148346	LCN2	lipocalin 2 [Source:HGNC Symbol;Acc:HGNC:6526]	-0.215974	0.0414084
ENSG00000143546	S100A8	S100 calcium binding protein A8 [Source:HGNC Symbol;Acc:HGNC:10498]	-0.549955	0.00283765

## Sheet: Table 7e
ensembl_gene_id	gene_name	description	log2FoldChange	padj
ENSG00000115009	CCL20	C-C motif chemokine ligand 20 [Source:HGNC Symbol;Acc:HGNC:10619]	2.38593	2.09255e-41
ENSG00000124107	SLPI	secretory leukocyte peptidase inhibitor [Source:HGNC Symbol;Acc:HGNC:11092]	-0.202393	0.0865702
ENSG00000143546	S100A8	S100 calcium binding protein A8 [Source:HGNC Symbol;Acc:HGNC:10498]	-0.588369	0.000699252
ENSG00000148346	LCN2	lipocalin 2 [Source:HGNC Symbol;Acc:HGNC:6526]	-0.572577	1.25008e-08

## Sheet: Table 7f 
ensembl_gene_id	gene_name	description	log2FoldChange	padj
ENSG00000115009	CCL20	C-C motif chemokine ligand 20 [Source:HGNC Symbol;Acc:HGNC:10619]	0.111502	0.774048
ENSG00000124107	SLPI	secretory leukocyte peptidase inhibitor [Source:HGNC Symbol;Acc:HGNC:11092]	0.169819	0.140513
ENSG00000148346	LCN2	lipocalin 2 [Source:HGNC Symbol;Acc:HGNC:6526]	-1.09509	1.63342e-24
ENSG00000143546	S100A8	S100 calcium binding protein A8 [Source:HGNC Symbol;Acc:HGNC:10498]	-0.5653	0.000820153
