# Supplementary material for: Cervicovaginal microbiome alters transcriptomic and epigenomic signatures across cervicovaginal epithelial barriers
Source: Research Square preprint supplement (doi:10.21203/rs.3.rs-6171614/v1), 2025-05-07
Supplement: Supplementary file 6 [file 66b4467902797992138d094f.docx]

**Supplemental Methods**

**Cell Death Assay**

Ectocervical, endocervical or vaginal, cells were grown and exposed to bacterial culture supernatants as described in the manuscript. Lactate dehydrogenase (LDH) released upon cell lysis (n=3-9 independent experiments per cell type) was quantified using the CytoTox 96 Non-radioactive cytotoxicity assay (Promega, Madison, WI), a coupled enzymatic assay that results in the conversion of a tetrazolium salt into a red formazan product. The colorimetric output was measured using a plate reader at 490 nm and absorbance values were recorded.
