# Supplementary material for: Cervicovaginal microbiome alters transcriptomic and epigenomic signatures across cervicovaginal epithelial barriers
Source: Research Square preprint supplement (doi:10.21203/rs.3.rs-6171614/v1), 2025-05-07
Supplement: Supplementary file 8 [file 78a491f06ec77dd2117461c5.xlsx]

## Sheet: TOC
ATAC Differentially Accessible Peaks
Table of Contents
Supplemental Table 9a	Ecto LC vs NYC
Supplemental Table 9b	Endo LC vs NYC
Supplemental Table 9c	VK2 LC vs NYC

## Sheet: Table 9a - Ecto LC vs NYC
	seqnames	start	end	width	strand	baseMean	log2FoldChange	lfcSE	stat	pvalue	padj	annotation	geneChr	geneStart	geneEnd	geneLength	geneStrand	geneId	transcriptId	distanceToTSS	ENSEMBL	SYMBOL	GENENAME
NYC_117	chr1	2652930	2653430	501	*	63.5425	-1.45339	0.48939	-2.9698	0.00297997	0.0233279	Intron (ENST00000401095.8/100287898, intron 6 of 8)	1	2590639	2633016	42378	2	79258	ENST00000378412.8	-19914	ENSG00000142606	MMEL1	membrane metalloendopeptidase like 1
NYC_118	chr1	2653551	2654051	501	*	41.5101	-1.71121	0.459331	-3.72545	0.00019497	0.00572163	Intron (ENST00000401095.8/100287898, intron 6 of 8)	1	2590639	2633016	42378	2	79258	ENST00000378412.8	-20535	ENSG00000142606	MMEL1	membrane metalloendopeptidase like 1
NYC_120	chr1	2654615	2655115	501	*	33.7526	-1.42583	0.477417	-2.98655	0.00282143	0.0225477	Intron (ENST00000401095.8/100287898, intron 6 of 8)	1	2590639	2633016	42378	2	79258	ENST00000378412.8	-21599	ENSG00000142606	MMEL1	membrane metalloendopeptidase like 1
NYC_121	chr1	2655457	2655957	501	*	39.7916	-1.67567	0.46269	-3.62158	0.000292811	0.00686503	Intron (ENST00000401095.8/100287898, intron 6 of 8)	1	2590639	2633016	42378	2	79258	ENST00000378412.8	-22441	ENSG00000142606	MMEL1	membrane metalloendopeptidase like 1
NYC_122	chr1	2683967	2684467	501	*	68.0308	-1.74552	0.334576	-5.21712	1.82e-07	0.000335262	Intron (ENST00000401095.8/100287898, intron 6 of 8)	1	2590639	2633016	42378	2	79258	ENST00000378412.8	-50951	ENSG00000142606	MMEL1	membrane metalloendopeptidase like 1
NYC_436	chr1	16606276	16606776	501	*	43.1576	-2.51154	0.604127	-4.15731	3.22e-05	0.00287131	Promoter (1-2kb)	1	16564853	16604934	40082	2	55672	ENST00000392963.5	-1342	ENSG00000219481	NBPF1	NBPF member 1
NYC_437	chr1	16607555	16608055	501	*	47.5189	-1.76717	0.459033	-3.84977	0.00011823	0.00465103	Promoter (<=1kb)	1	16593562	16608650	15089	2	55672	ENST00000420513.1	595	ENSG00000219481	NBPF1	NBPF member 1
NYC_438	chr1	16608354	16608854	501	*	51.2522	-1.79957	0.416716	-4.31846	1.57e-05	0.00222425	Promoter (<=1kb)	1	16593562	16608650	15089	2	55672	ENST00000420513.1	0	ENSG00000219481	NBPF1	NBPF member 1
NYC_439	chr1	16609739	16610239	501	*	38.58	-2.02462	0.570215	-3.55063	0.000384316	0.00775414	Promoter (1-2kb)	1	16593562	16608650	15089	2	55672	ENST00000420513.1	-1089	ENSG00000219481	NBPF1	NBPF member 1
NYC_443	chr1	16615826	16616326	501	*	35.0576	-2.11327	0.562157	-3.75921	0.000170449	0.00540001	Promoter (2-3kb)	1	16599589	16613562	13974	2	55672	ENST00000599069.5	-2264	ENSG00000219481	NBPF1	NBPF member 1
NYC_444	chr1	16620116	16620616	501	*	60.4115	-1.01636	0.271466	-3.74396	0.000181142	0.00555631	Exon (ENST00000639594.1/84809, exon 6 of 7)	1	16618253	16626386	8134	2	84809	ENST00000639481.1	5770	ENSG00000215908	CROCCP2	CROCC pseudogene 2
NYC_450	chr1	16626129	16626629	501	*	57.4891	-1.24227	0.360726	-3.44382	0.000573564	0.009264	Promoter (<=1kb)	1	16618253	16626386	8134	2	84809	ENST00000639481.1	0	ENSG00000215908	CROCCP2	CROCC pseudogene 2
NYC_452	chr1	16629468	16629968	501	*	48.9162	-1.77299	0.449865	-3.94117	8.11e-05	0.0040447	Promoter (<=1kb)	1	16618256	16628652	10397	2	84809	ENST00000640476.1	-816	ENSG00000215908	CROCCP2	CROCC pseudogene 2
NYC_453	chr1	16630285	16630785	501	*	57.7423	-1.08614	0.382727	-2.8379	0.00454119	0.0308355	Promoter (<=1kb)	1	16618256	16631109	12854	2	84809	ENST00000639594.1	324	ENSG00000215908	CROCCP2	CROCC pseudogene 2
NYC_454	chr1	16631084	16631584	501	*	40.4727	-1.3688	0.455582	-3.00452	0.00266003	0.021733	Promoter (<=1kb)	1	16618256	16631109	12854	2	84809	ENST00000639594.1	0	ENSG00000215908	CROCCP2	CROCC pseudogene 2
NYC_455	chr1	16631624	16632124	501	*	47.7047	-1.20137	0.402941	-2.9815	0.00286838	0.0227828	Promoter (<=1kb)	1	16618256	16631109	12854	2	84809	ENST00000639594.1	-515	ENSG00000215908	CROCCP2	CROCC pseudogene 2
NYC_456	chr1	16633107	16633607	501	*	51.8142	-1.77979	0.481029	-3.69996	0.000215635	0.00599505	Promoter (1-2kb)	1	16618256	16631109	12854	2	84809	ENST00000639594.1	-1998	ENSG00000215908	CROCCP2	CROCC pseudogene 2
NYC_457	chr1	16641149	16641649	501	*	43.2872	-1.64755	0.585655	-2.81318	0.00490549	0.0324692	Intron (ENST00000639456.1/84809, intron 3 of 12)	1	16625375	16644672	19298	2	84809	ENST00000635081.1	3023	ENSG00000215908	CROCCP2	CROCC pseudogene 2
NYC_458	chr1	16642982	16643482	501	*	51.1656	-1.0115	0.346466	-2.91948	0.00350619	0.0259367	Promoter (1-2kb)	1	16625375	16644672	19298	2	84809	ENST00000635081.1	1190	ENSG00000215908	CROCCP2	CROCC pseudogene 2
LC_837	chr1	22388632	22389132	501	*	97.6303	1.01786	0.176256	5.77489	7.7e-09	6.94e-05	Distal Intergenic	1	22428838	22511763	82926	1	9923	ENST00000650433.1	-39706	ENSG00000184677	ZBTB40	zinc finger and BTB domain containing 40
NYC_1868	chr1	144104019	144104519	501	*	60.699	-1.14158	0.430441	-2.65212	0.00799871	0.0463054	Distal Intergenic	1	143975087	144068350	93264	1	100996712	ENST00000605551.2	128932	NA	SRGAP2D	SLIT-ROBO Rho GTPase activating protein 2D (pseudogene)
NYC_2321	chr1	169362915	169363415	501	*	36.5116	-1.10973	0.37803	-2.93557	0.00332935	0.0250528	Intron (ENST00000367811.8/29922, intron 1 of 11)	1	169230714	169367730	137017	2	29922	ENST00000528517.5	4315	ENSG00000143156	NME7	NME/NM23 family member 7
LC_3778	chr1	182614913	182615413	501	*	49.626	1.12866	0.299088	3.77366	0.000160867	0.00527617	Promoter (<=1kb)	1	182615254	182616629	1376	1	284648	ENST00000566297.1	0	ENSG00000261504	LINC01686	long intergenic non-protein coding RNA 1686
LC_4049	chr1	203100583	203101083	501	*	42.3934	1.07548	0.323549	3.32402	0.0008873	0.0115623	Intron (ENST00000309502.7/134, intron 2 of 5)	1	203090654	203167404	76751	1	134	ENST00000309502.7	9929	ENSG00000163485	ADORA1	adenosine A1 receptor
LC_5210	chr2	23425756	23426256	501	*	79.6969	1.16832	0.213273	5.47803	4.3e-08	0.00017178	Intron (ENST00000486442.6/114818, intron 1 of 13)	2	23385179	23708606	323428	1	114818	ENST00000486442.6	40577	ENSG00000119771	KLHL29	kelch like family member 29
LC_5888	chr2	64453035	64453535	501	*	64.6901	1.04431	0.239624	4.35812	1.31e-05	0.00208991	Promoter (<=1kb)	2	64395220	64453798	58579	2	105374771	ENST00000441630.1	263	NA	LGALSL-DT	LGALSL divergent transcript
LC_5940	chr2	65710609	65711109	501	*	36.4864	1.03772	0.370155	2.80347	0.00505559	0.0332076	Intron (ENST00000606978.5/105369168, intron 5 of 9)	2	65731675	65770104	38430	1	105369167	ENST00000414811.5	-20566	NA	LOC105369167	uncharacterized LOC105369167
NYC_3964	chr2	89833052	89833552	501	*	36.9276	-2.0881	0.717663	-2.90959	0.00361909	0.0264189	Distal Intergenic	2	89622213	89640635	18423	2	101927050	ENST00000636037.1	-192417	NA	LOC101927050	lysine methyltransferase 2C pseudogene
LC_10197	chr3	129313698	129314198	501	*	71.2429	1.30404	0.250437	5.20705	1.92e-07	0.000335262	Promoter (1-2kb)	3	129315392	129318311	2920	1	339942	ENST00000511998.1	-1194	NA	H1-10-AS1	H1-10 antisense RNA 1
NYC_6872	chr3	194138993	194139493	501	*	59.0596	-1.20707	0.25763	-4.6853	2.8e-06	0.00125289	Promoter (2-3kb)	3	194136148	194138732	2585	1	3280	ENST00000232424.4	2845	ENSG00000114315	HES1	hes family bHLH transcription factor 1
NYC_6895	chr3	195697788	195698288	501	*	63.5477	-1.02692	0.330955	-3.1029	0.00191637	0.017794	Promoter (<=1kb)	3	195698663	195708807	10145	1	440993	ENST00000618708.3	-375	NA	MIR570HG	MIR570 host gene
LC_11259	chr4	8101120	8101620	501	*	52.4636	1.25768	0.295443	4.25693	2.07e-05	0.00249228	Intron (ENST00000676532.1/84448, intron 2 of 20)	4	7966046	8127660	161615	2	84448	ENST00000545242.6	26040	ENSG00000163995	ABLIM2	actin binding LIM protein family member 2
NYC_7312	chr4	49102390	49102890	501	*	41.495	-1.95887	0.736093	-2.66117	0.00778686	0.0454176	Distal Intergenic	4	49028692	49031276	2585	1	80157	ENST00000507372.1	73698	ENSG00000109182	CWH43	cell wall biogenesis 43 C-terminal homolog
NYC_7313	chr4	49105194	49105694	501	*	30.1371	-2.19492	0.726669	-3.02052	0.00252345	0.021054	Distal Intergenic	4	49028692	49031276	2585	1	80157	ENST00000507372.1	76502	ENSG00000109182	CWH43	cell wall biogenesis 43 C-terminal homolog
NYC_7314	chr4	49108139	49108639	501	*	71.1518	-2.01353	0.724546	-2.77903	0.00545217	0.0350545	Distal Intergenic	4	49028692	49031276	2585	1	80157	ENST00000507372.1	79447	ENSG00000109182	CWH43	cell wall biogenesis 43 C-terminal homolog
NYC_7315	chr4	49118538	49119038	501	*	44.4218	-2.17035	0.677169	-3.20503	0.00135047	0.0144969	Distal Intergenic	4	49028692	49031276	2585	1	80157	ENST00000507372.1	89846	ENSG00000109182	CWH43	cell wall biogenesis 43 C-terminal homolog
NYC_7318	chr4	49120774	49121274	501	*	123.426	-2.39749	0.738452	-3.24664	0.00116777	0.0133713	Distal Intergenic	4	49028692	49031276	2585	1	80157	ENST00000507372.1	92082	ENSG00000109182	CWH43	cell wall biogenesis 43 C-terminal homolog
NYC_7319	chr4	49149452	49149952	501	*	40.0953	-1.82221	0.607887	-2.99761	0.00272108	0.0220514	Distal Intergenic	4	49028692	49031276	2585	1	80157	ENST00000507372.1	120760	ENSG00000109182	CWH43	cell wall biogenesis 43 C-terminal homolog
NYC_7320	chr4	49510756	49511256	501	*	42.1501	-2.01753	0.552765	-3.64988	0.000262359	0.00655335	Distal Intergenic	4	49028692	49031276	2585	1	80157	ENST00000507372.1	482064	ENSG00000109182	CWH43	cell wall biogenesis 43 C-terminal homolog
NYC_7321	chr4	49511307	49511807	501	*	41.3374	-2.43354	0.536179	-4.53867	5.66e-06	0.00159875	Distal Intergenic	4	49028692	49031276	2585	1	80157	ENST00000507372.1	482615	ENSG00000109182	CWH43	cell wall biogenesis 43 C-terminal homolog
NYC_7322	chr4	49511924	49512424	501	*	60.2401	-1.81598	0.524863	-3.45992	0.000540342	0.00898893	Distal Intergenic	4	49028692	49031276	2585	1	80157	ENST00000507372.1	483232	ENSG00000109182	CWH43	cell wall biogenesis 43 C-terminal homolog
NYC_7323	chr4	49513117	49513617	501	*	69.6408	-1.67657	0.386633	-4.33634	1.45e-05	0.00214315	Distal Intergenic	4	49028692	49031276	2585	1	80157	ENST00000507372.1	484425	ENSG00000109182	CWH43	cell wall biogenesis 43 C-terminal homolog
NYC_7324	chr4	49514007	49514507	501	*	50.5933	-1.88677	0.53825	-3.50537	0.000455966	0.00833364	Distal Intergenic	4	49028692	49031276	2585	1	80157	ENST00000507372.1	485315	ENSG00000109182	CWH43	cell wall biogenesis 43 C-terminal homolog
NYC_8019	chr4	169828327	169828827	501	*	29.6521	-2.13243	0.718083	-2.96962	0.00298169	0.0233316	Distal Intergenic	4	169729470	169757944	28475	2	54969	ENST00000393381.3	-70383	ENSG00000056050	HPF1	histone PARylation factor 1
NYC_8047	chr4	176187568	176188068	501	*	37.1376	-1.24283	0.377369	-3.29342	0.000989771	0.0122518	Intron (ENST00000280191.7/132851, intron 5 of 5)	4	176184660	176194877	10218	2	132851	ENST00000515234.1	6809	ENSG00000150628	SPATA4	spermatogenesis associated 4
NYC_8314	chr5	21479162	21479662	501	*	32.5687	-2.08014	0.611609	-3.40109	0.000671188	0.0100056	Intron (ENST00000508260.5/728411, intron 4 of 8)	5	21470982	21474438	3457	1	728411	ENST00000652767.1	8180	ENSG00000183666	GUSBP1	GUSB pseudogene 1
NYC_8315	chr5	21483903	21484403	501	*	39.6811	-1.6053	0.573111	-2.80104	0.00509387	0.0333896	Exon (ENST00000502532.1/ENST00000502532.1, exon 1 of 1)	5	21470982	21474438	3457	1	728411	ENST00000652767.1	12921	ENSG00000183666	GUSBP1	GUSB pseudogene 1
NYC_8316	chr5	21495989	21496489	501	*	38.1847	-1.61226	0.527347	-3.05731	0.00223334	0.0194884	Intron (ENST00000508260.5/728411, intron 6 of 8)	5	21470982	21474438	3457	1	728411	ENST00000652767.1	25007	ENSG00000183666	GUSBP1	GUSB pseudogene 1
NYC_8342	chr5	34181832	34182332	501	*	42.3494	-1.89677	0.558825	-3.3942	0.000688286	0.0101195	Intron (ENST00000514048.5/114899, intron 2 of 5)	5	34164698	34189514	24817	2	114899	ENST00000514048.5	7182	ENSG00000082196	C1QTNF3	C1q and TNF related 3
NYC_8343	chr5	34188123	34188623	501	*	53.1599	-1.35695	0.447139	-3.03474	0.00240739	0.0204674	Promoter (<=1kb)	5	34164698	34189514	24817	2	114899	ENST00000514048.5	891	ENSG00000082196	C1QTNF3	C1q and TNF related 3
NYC_8344	chr5	34189823	34190323	501	*	74.1596	-1.3267	0.374842	-3.53935	0.000401112	0.00784776	Promoter (<=1kb)	5	34190056	34193653	3598	1	646652	ENST00000505001.2	0	NA	LOC646652	integral membrane glycoprotein-like pseudogene
NYC_8345	chr5	34191226	34191726	501	*	53.3771	-1.48029	0.386803	-3.82698	0.000129726	0.00481847	Promoter (1-2kb)	5	34190056	34193653	3598	1	646652	ENST00000505001.2	1170	NA	LOC646652	integral membrane glycoprotein-like pseudogene
NYC_8346	chr5	34192317	34192817	501	*	55.5392	-1.66398	0.443583	-3.75123	0.000175971	0.00549401	Promoter (2-3kb)	5	34190056	34193653	3598	1	646652	ENST00000505001.2	2261	NA	LOC646652	integral membrane glycoprotein-like pseudogene
NYC_9007	chr5	138469888	138470388	501	*	43.7558	-1.42412	0.341855	-4.16584	3.1e-05	0.00287131	Distal Intergenic	5	138465479	138469303	3825	1	1958	ENST00000239938.5	4409	ENSG00000120738	EGR1	early growth response 1
NYC_9474	chr5	178585416	178585916	501	*	68.2546	-1.30227	0.341618	-3.81206	0.000137813	0.00494178	Intron (ENST00000390654.8/91522, intron 1 of 28)	5	178237618	178590393	352776	2	91522	ENST00000390654.8	4477	ENSG00000050767	COL23A1	collagen type XXIII alpha 1 chain
LC_15611	chr6	6857139	6857639	501	*	105.461	1.01143	0.165285	6.11932	9.4e-10	1.75e-05	Distal Intergenic	6	6758276	6759291	1016	2	105374901	ENST00000435429.2	-97848	NA	LOC105374901	uncharacterized LOC105374901
LC_18013	chr6	147135116	147135616	501	*	42.8743	1.0967	0.33743	3.25014	0.00115347	0.0132768	Intron (ENST00000662679.1/729178, intron 2 of 10)	6	146962391	147131986	169596	2	729178	ENST00000447072.6	-3130	ENSG00000233452	STXBP5-AS1	STXBP5 antisense RNA 1
LC_18735	chr7	26490823	26491323	501	*	56.3485	1.16083	0.265843	4.36661	1.26e-05	0.00206878	Intron (ENST00000439120.2/441204, intron 1 of 2)	7	26487141	26494350	7210	1	441204	ENST00000665801.1	3682	ENSG00000214870	LOC441204	uncharacterized LOC441204
NYC_12029	chr7	77665150	77665650	501	*	28.2231	-1.14683	0.40251	-2.8492	0.00438291	0.0300895	Intron (ENST00000659053.1/100505854, intron 2 of 3)	7	77636972	77638941	1970	1	5782	ENST00000519553.1	28178	ENSG00000127947	PTPN12	protein tyrosine phosphatase non-receptor type 12
NYC_12591	chr7	152402523	152403023	501	*	46.0936	-1.51147	0.391568	-3.86004	0.000113369	0.00458038	Exon (ENST00000517279.1/ENST00000517279.1, exon 1 of 1)	7	152330172	152435706	105535	2	58508	ENST00000683800.1	32683	ENSG00000055609	KMT2C	lysine methyltransferase 2C
NYC_12592	chr7	152403728	152404228	501	*	38.8639	-1.96926	0.585044	-3.36601	0.000762648	0.0106659	Intron (ENST00000262189.11/58508, intron 1 of 58)	7	152330172	152435706	105535	2	58508	ENST00000683800.1	31478	ENSG00000055609	KMT2C	lysine methyltransferase 2C
NYC_12781	chr8	57205720	57206220	501	*	75.5253	-1.83057	0.400095	-4.57535	4.75e-06	0.00154563	Intron (ENST00000669200.1/100507651, intron 4 of 6)	8	57218276	57219567	1292	1	100507651	ENST00000520929.1	-12056	ENSG00000253301	LINC01606	long intergenic non-protein coding RNA 1606
NYC_12782	chr8	57209805	57210305	501	*	90.2518	-1.5443	0.527802	-2.92591	0.00343454	0.0255617	Exon (ENST00000521653.6/ENST00000521653.6, exon 7 of 7)	8	57218276	57219567	1292	1	100507651	ENST00000520929.1	-7971	ENSG00000253301	LINC01606	long intergenic non-protein coding RNA 1606
NYC_12893	chr8	85659785	85660285	501	*	56.4264	-2.08684	0.591131	-3.53025	0.000415164	0.00798855	Exon (ENST00000379010.3/ENST00000379010.3, exon 1 of 1)	8	85523899	85540511	16613	1	105375937	ENST00000520459.1	135886	NA	LOC105375937	uncharacterized LOC105375937
NYC_13769	chr9	39588419	39588919	501	*	36.3077	-1.83568	0.623887	-2.94233	0.00325748	0.024692	Distal Intergenic	9	39444304	39508885	64582	2	401509	ENST00000602828.2	-79534	NA	ZNF658B	zinc finger protein 658B (pseudogene)
NYC_13770	chr9	40884887	40885387	501	*	40.1132	-1.98243	0.623006	-3.18203	0.00146244	0.0152452	Distal Intergenic	9	40929010	40929092	83	2	100302167	ENST00000622265.1	43705	ENSG00000275377	MIR1299	microRNA 1299
NYC_13771	chr9	40913785	40914285	501	*	54.0045	-2.11534	0.531542	-3.97962	6.9e-05	0.00380313	Distal Intergenic	9	40929010	40929092	83	2	100302167	ENST00000622265.1	14807	ENSG00000275377	MIR1299	microRNA 1299
NYC_13772	chr9	40924278	40924778	501	*	35.9723	-1.68099	0.611068	-2.75091	0.00594299	0.0371962	Distal Intergenic	9	40929010	40929092	83	2	100302167	ENST00000622265.1	4314	ENSG00000275377	MIR1299	microRNA 1299
NYC_13773	chr9	40925014	40925514	501	*	39.9307	-2.22545	0.518678	-4.29062	1.78e-05	0.00231812	Distal Intergenic	9	40929010	40929092	83	2	100302167	ENST00000622265.1	3578	ENSG00000275377	MIR1299	microRNA 1299
NYC_13774	chr9	40925949	40926449	501	*	45.6423	-2.0984	0.58987	-3.5574	0.000374538	0.00765034	Promoter (2-3kb)	9	40929010	40929092	83	2	100302167	ENST00000622265.1	2643	ENSG00000275377	MIR1299	microRNA 1299
NYC_13775	chr9	40926646	40927146	501	*	30.9139	-1.83668	0.645632	-2.84477	0.00444429	0.0303729	Promoter (1-2kb)	9	40929010	40929092	83	2	100302167	ENST00000622265.1	1946	ENSG00000275377	MIR1299	microRNA 1299
NYC_13777	chr9	40927718	40928218	501	*	30.4381	-1.76454	0.615369	-2.86745	0.00413788	0.0289562	Promoter (<=1kb)	9	40929010	40929092	83	2	100302167	ENST00000622265.1	874	ENSG00000275377	MIR1299	microRNA 1299
NYC_13783	chr9	41229603	41230103	501	*	118.717	-1.707	0.468263	-3.64539	0.000266982	0.00658529	Distal Intergenic	9	41233755	41233835	81	1	100616184	ENST00000612572.1	-3652	ENSG00000276029	MIR4477A	microRNA 4477a
NYC_13785	chr9	42388109	42388609	501	*	42.0955	-1.79398	0.545575	-3.28824	0.00100815	0.012357	Distal Intergenic	9	42566993	42569310	2318	2	103908605	ENST00000428895.1	180701	NA	LOC103908605	uncharacterized LOC103908605
NYC_13786	chr9	42388622	42389122	501	*	41.3969	-1.54002	0.528617	-2.9133	0.00357626	0.0262297	Distal Intergenic	9	42566993	42569310	2318	2	103908605	ENST00000428895.1	180188	NA	LOC103908605	uncharacterized LOC103908605
NYC_13787	chr9	62800522	62801022	501	*	53.526	-1.50914	0.472367	-3.19484	0.00139907	0.0148174	Promoter (<=1kb)	9	62801461	62810186	8726	1	103352539	ENST00000427509.5	-439	ENSG00000238113	LINC01410	long intergenic non-protein coding RNA 1410
NYC_13789	chr9	62804223	62804723	501	*	34.5147	-1.92526	0.651178	-2.95657	0.00311078	0.0239957	Promoter (1-2kb)	9	62802789	62813486	10698	1	103352539	ENST00000660304.1	1434	ENSG00000238113	LINC01410	long intergenic non-protein coding RNA 1410
NYC_13790	chr9	62816332	62816832	501	*	40.1823	-1.84368	0.580516	-3.17593	0.00149358	0.015417	Distal Intergenic	9	62802789	62813486	10698	1	103352539	ENST00000660304.1	13543	ENSG00000238113	LINC01410	long intergenic non-protein coding RNA 1410
NYC_13792	chr9	62861086	62861586	501	*	45.0439	-2.04303	0.522745	-3.90827	9.3e-05	0.00421567	Exon (ENST00000435875.1/ENST00000435875.1, exon 1 of 1)	9	62868197	62869868	1672	2	403323	ENST00000612590.1	8282	NA	LERFS	lncRNA negative regulator of fibroblast-like synoviocyte migration, SYNCRIP interacting
NYC_13794	chr9	62864876	62865376	501	*	50.0053	-1.28864	0.372446	-3.45993	0.000540318	0.00898893	Exon (ENST00000590130.1/ENST00000590130.1, exon 1 of 2)	9	62868197	62869868	1672	2	403323	ENST00000612590.1	4492	NA	LERFS	lncRNA negative regulator of fibroblast-like synoviocyte migration, SYNCRIP interacting
NYC_13796	chr9	63816646	63817146	501	*	48.5126	-1.26209	0.426705	-2.95776	0.00309879	0.0239396	Promoter (2-3kb)	9	63819574	63819654	81	1	100616194	ENST00000581659.1	-2428	ENSG00000266017	MIR4477B	microRNA 4477b
NYC_13852	chr9	71729828	71730328	501	*	36.7922	-1.03189	0.393769	-2.62056	0.00877865	0.0495834	Promoter (<=1kb)	9	71730153	71730984	832	2	23670	ENST00000546219.1	656	ENSG00000135048	CEMIP2	cell migration inducing hyaluronidase 2
NYC_14080	chr9	89881709	89882209	501	*	38.1871	-2.13226	0.605973	-3.51874	0.000433599	0.00814458	Intron (ENST00000656288.1/101927847, intron 2 of 6)	9	89826030	90019549	193520	1	101927847	ENST00000659397.1	55679	NA	LOC101927847	uncharacterized LOC101927847
NYC_15196	chr9	132994847	132995347	501	*	31.0942	-1.56415	0.564784	-2.76947	0.00561477	0.035775	Distal Intergenic	9	132986679	132991565	4887	1	8328	ENST00000636263.1	8168	ENSG00000165702	GFI1B	growth factor independent 1B transcriptional repressor
NYC_15230	chr9	133854056	133854556	501	*	42.7785	-1.38425	0.523902	-2.64219	0.00823707	0.0473082	Intron (ENST00000406606.7/7410, intron 3 of 26)	9	133925851	133939301	13451	2	7410	ENST00000472905.1	84745	ENSG00000160293	VAV2	vav guanine nucleotide exchange factor 2
NYC_15236	chr9	133920544	133921044	501	*	28.5077	-1.79074	0.635423	-2.81818	0.0048296	0.032114	Intron (ENST00000406606.7/7410, intron 2 of 26)	9	133925851	133939301	13451	2	7410	ENST00000472905.1	18257	ENSG00000160293	VAV2	vav guanine nucleotide exchange factor 2
NYC_15315	chr9	136341151	136341651	501	*	51.2423	-1.06471	0.337846	-3.15147	0.00162449	0.0161001	3' UTR	9	136331983	136359605	27623	1	26086	ENST00000354753.7	9168	ENSG00000160360	GPSM1	G protein signaling modulator 1
NYC_15339	chr9	136526963	136527463	501	*	38.6174	-1.46255	0.496632	-2.94494	0.00323013	0.024564	Intron (ENST00000651671.1/4851, intron 2 of 33)	9	136522572	136523898	1327	2	4851	ENST00000491649.2	-3065	ENSG00000148400	NOTCH1	notch receptor 1
NYC_15414	chr9	137015351	137015851	501	*	35.0678	-1.68946	0.604756	-2.79362	0.00521223	0.0339214	Promoter (2-3kb)	9	137012325	137018211	5887	2	20	ENST00000488535.2	2360	ENSG00000107331	ABCA2	ATP binding cassette subfamily A member 2
NYC_15502	chr9	137900798	137901298	501	*	35.3043	-1.81377	0.586272	-3.09374	0.00197651	0.0180882	Intron (ENST00000371372.6/774, intron 3 of 46)	9	137867925	137892570	24646	2	100133077	ENST00000371390.1	-8228	ENSG00000203987	LOC100133077	uncharacterized LOC100133077
NYC_15859	chr10	46522524	46523024	501	*	39.8525	-1.80038	0.528074	-3.40934	0.000651209	0.00988159	Intron (ENST00000616785.1/643650, intron 3 of 3)	10	46549044	46555530	6487	2	9721	ENST00000374317.1	32506	ENSG00000204175	GPRIN2	G protein regulated inducer of neurite outgrowth 2
NYC_15863	chr10	46525693	46526193	501	*	39.4132	-1.89427	0.526229	-3.5997	0.000318581	0.0071285	Intron (ENST00000616785.1/643650, intron 3 of 3)	10	46549044	46555530	6487	2	9721	ENST00000374317.1	29337	ENSG00000204175	GPRIN2	G protein regulated inducer of neurite outgrowth 2
NYC_15866	chr10	46528573	46529073	501	*	51.7	-1.64478	0.465784	-3.53121	0.000413669	0.00797598	Intron (ENST00000616785.1/643650, intron 3 of 3)	10	46549044	46555530	6487	2	9721	ENST00000374317.1	26457	ENSG00000204175	GPRIN2	G protein regulated inducer of neurite outgrowth 2
NYC_15867	chr10	46545490	46545990	501	*	46.0041	-1.35079	0.445471	-3.03228	0.00242717	0.0205543	Distal Intergenic	10	46549044	46555530	6487	2	9721	ENST00000374317.1	9540	ENSG00000204175	GPRIN2	G protein regulated inducer of neurite outgrowth 2
NYC_15871	chr10	46550351	46550851	501	*	53.2504	-1.43049	0.448077	-3.1925	0.00141046	0.0148955	5' UTR	10	46549044	46555530	6487	2	9721	ENST00000374317.1	4679	ENSG00000204175	GPRIN2	G protein regulated inducer of neurite outgrowth 2
NYC_15873	chr10	46557168	46557668	501	*	42.6461	-1.54646	0.483517	-3.19836	0.00138211	0.0147085	Promoter (1-2kb)	10	46549044	46555530	6487	2	9721	ENST00000374317.1	-1638	ENSG00000204175	GPRIN2	G protein regulated inducer of neurite outgrowth 2
NYC_15874	chr10	46560482	46560982	501	*	42.9072	-1.24851	0.426664	-2.92621	0.00343118	0.0255476	Distal Intergenic	10	46549044	46555530	6487	2	9721	ENST00000374317.1	-4952	ENSG00000204175	GPRIN2	G protein regulated inducer of neurite outgrowth 2
NYC_17280	chr11	57288620	57289120	501	*	70.6353	-1.117	0.197146	-5.66586	1.46e-08	9.42e-05	Distal Intergenic	11	57299642	57300679	1038	2	85456	ENST00000532273.5	11559	ENSG00000149115	TNKS1BP1	tankyrase 1 binding protein 1
NYC_17439	chr11	61863705	61864205	501	*	41.4478	-1.42973	0.431782	-3.31124	0.000928835	0.011839	Promoter (1-2kb)	11	61861973	61865319	3347	1	9415	ENST00000522359.2	1732	ENSG00000134824	FADS2	fatty acid desaturase 2
LC_27719	chr11	61963103	61963603	501	*	87.6746	1.18497	0.203927	5.81078	6.22e-09	6.94e-05	3' UTR	11	61964601	61967166	2566	2	2495	ENST00000532601.1	3563	ENSG00000167996	FTH1	ferritin heavy chain 1
LC_27727	chr11	62012887	62013387	501	*	88.2037	1.03527	0.186668	5.54607	2.92e-08	0.000125671	Distal Intergenic	11	61967794	61969490	1697	1	399900	ENST00000623785.1	45093	ENSG00000279491	LOC399900	uncharacterized LOC399900
LC_28025	chr11	65426892	65427392	501	*	305.931	1.17019	0.182561	6.40985	1.46e-10	4.07e-06	Promoter (2-3kb)	11	65423960	65424118	159	1	283131	ENST00000613347.1	2932	ENSG00000245532	NEAT1	nuclear paraspeckle assembly transcript 1
NYC_18428	chr11	90281891	90282391	501	*	43.3624	-1.70969	0.528197	-3.23684	0.00120861	0.0136062	Intron (ENST00000649150.1/101929222, intron 1 of 7)	11	90251285	90863359	612075	1	101929222	ENST00000561596.5	30606	ENSG00000261645	DISC1FP1	DISC1 fusion partner 1
NYC_18429	chr11	90283062	90283562	501	*	48.5411	-1.75156	0.40612	-4.31291	1.61e-05	0.00225235	Exon (ENST00000530835.1/ENST00000530835.1, exon 1 of 1)	11	90251285	90863359	612075	1	101929222	ENST00000561596.5	31777	ENSG00000261645	DISC1FP1	DISC1 fusion partner 1
NYC_18431	chr11	90287434	90287934	501	*	43.1464	-1.90616	0.551572	-3.45586	0.000548538	0.00905609	Intron (ENST00000649150.1/101929222, intron 1 of 7)	11	90251285	90863359	612075	1	101929222	ENST00000561596.5	36149	ENSG00000261645	DISC1FP1	DISC1 fusion partner 1
NYC_18432	chr11	90289924	90290424	501	*	41.1842	-2.39581	0.635693	-3.76881	0.000164028	0.00531431	Intron (ENST00000649150.1/101929222, intron 1 of 7)	11	90251285	90863359	612075	1	101929222	ENST00000561596.5	38639	ENSG00000261645	DISC1FP1	DISC1 fusion partner 1
NYC_18434	chr11	90292093	90292593	501	*	40.7297	-2.01872	0.623313	-3.2387	0.00120075	0.0135641	Intron (ENST00000649150.1/101929222, intron 1 of 7)	11	90251285	90863359	612075	1	101929222	ENST00000561596.5	40808	ENSG00000261645	DISC1FP1	DISC1 fusion partner 1
NYC_18435	chr11	90292715	90293215	501	*	40.2809	-2.31811	0.59096	-3.92262	8.76e-05	0.00414302	Intron (ENST00000649150.1/101929222, intron 1 of 7)	11	90251285	90863359	612075	1	101929222	ENST00000561596.5	41430	ENSG00000261645	DISC1FP1	DISC1 fusion partner 1
NYC_18436	chr11	90293717	90294217	501	*	57.1869	-1.837	0.522682	-3.51456	0.000440485	0.00820118	Intron (ENST00000649150.1/101929222, intron 1 of 7)	11	90251285	90863359	612075	1	101929222	ENST00000561596.5	42432	ENSG00000261645	DISC1FP1	DISC1 fusion partner 1
NYC_18437	chr11	90295679	90296179	501	*	39.0633	-2.57067	0.795049	-3.23334	0.0012235	0.0137185	Intron (ENST00000649150.1/101929222, intron 1 of 7)	11	90251285	90863359	612075	1	101929222	ENST00000561596.5	44394	ENSG00000261645	DISC1FP1	DISC1 fusion partner 1
NYC_18438	chr11	90296557	90297057	501	*	53.2919	-1.84621	0.598948	-3.08242	0.00205323	0.0185388	Intron (ENST00000649150.1/101929222, intron 1 of 7)	11	90251285	90863359	612075	1	101929222	ENST00000561596.5	45272	ENSG00000261645	DISC1FP1	DISC1 fusion partner 1
NYC_18439	chr11	90297845	90298345	501	*	40.6453	-1.79557	0.667045	-2.69182	0.00710629	0.0424351	Intron (ENST00000649150.1/101929222, intron 1 of 7)	11	90251285	90863359	612075	1	101929222	ENST00000561596.5	46560	ENSG00000261645	DISC1FP1	DISC1 fusion partner 1
NYC_18440	chr11	90301239	90301739	501	*	43.4007	-2.361	0.706608	-3.34131	0.000833833	0.0111916	Intron (ENST00000649150.1/101929222, intron 1 of 7)	11	90251285	90863359	612075	1	101929222	ENST00000561596.5	49954	ENSG00000261645	DISC1FP1	DISC1 fusion partner 1
NYC_18442	chr11	90302616	90303116	501	*	53.6277	-1.89538	0.523006	-3.62402	0.000290059	0.00683204	Intron (ENST00000649150.1/101929222, intron 1 of 7)	11	90251285	90863359	612075	1	101929222	ENST00000561596.5	51331	ENSG00000261645	DISC1FP1	DISC1 fusion partner 1
NYC_18443	chr11	90304194	90304694	501	*	49.8531	-2.05561	0.616509	-3.33426	0.000855252	0.0113542	Intron (ENST00000649150.1/101929222, intron 1 of 7)	11	90251285	90863359	612075	1	101929222	ENST00000561596.5	52909	ENSG00000261645	DISC1FP1	DISC1 fusion partner 1
NYC_18446	chr11	90310336	90310836	501	*	42.0508	-1.9421	0.659616	-2.94429	0.00323695	0.0245925	Intron (ENST00000649150.1/101929222, intron 1 of 7)	11	90251285	90863359	612075	1	101929222	ENST00000561596.5	59051	ENSG00000261645	DISC1FP1	DISC1 fusion partner 1
NYC_18447	chr11	90312029	90312529	501	*	45.4163	-1.96255	0.63784	-3.07686	0.00209194	0.01871	Intron (ENST00000649150.1/101929222, intron 1 of 7)	11	90251285	90863359	612075	1	101929222	ENST00000561596.5	60744	ENSG00000261645	DISC1FP1	DISC1 fusion partner 1
NYC_18448	chr11	90312705	90313205	501	*	38.4622	-1.74313	0.589662	-2.95615	0.0031151	0.0240118	Intron (ENST00000649150.1/101929222, intron 1 of 7)	11	90251285	90863359	612075	1	101929222	ENST00000561596.5	61420	ENSG00000261645	DISC1FP1	DISC1 fusion partner 1
NYC_18449	chr11	90314060	90314560	501	*	43.8437	-2.33674	0.63231	-3.69556	0.0002194	0.00604046	Intron (ENST00000649150.1/101929222, intron 1 of 7)	11	90251285	90863359	612075	1	101929222	ENST00000561596.5	62775	ENSG00000261645	DISC1FP1	DISC1 fusion partner 1
NYC_18450	chr11	90314604	90315104	501	*	33.7532	-1.91303	0.689532	-2.77438	0.00553067	0.035437	Intron (ENST00000649150.1/101929222, intron 1 of 7)	11	90251285	90863359	612075	1	101929222	ENST00000561596.5	63319	ENSG00000261645	DISC1FP1	DISC1 fusion partner 1
NYC_18452	chr11	90316185	90316685	501	*	40.4721	-2.10034	0.6274	-3.3477	0.000814862	0.011065	Intron (ENST00000649150.1/101929222, intron 1 of 7)	11	90251285	90863359	612075	1	101929222	ENST00000561596.5	64900	ENSG00000261645	DISC1FP1	DISC1 fusion partner 1
NYC_18453	chr11	90317440	90317940	501	*	55.9904	-2.22209	0.546668	-4.0648	4.81e-05	0.00329431	Intron (ENST00000649150.1/101929222, intron 1 of 7)	11	90251285	90863359	612075	1	101929222	ENST00000561596.5	66155	ENSG00000261645	DISC1FP1	DISC1 fusion partner 1
NYC_18455	chr11	90319227	90319727	501	*	39.9991	-1.67883	0.632204	-2.65553	0.00791847	0.0459908	Intron (ENST00000649150.1/101929222, intron 1 of 7)	11	90251285	90863359	612075	1	101929222	ENST00000561596.5	67942	ENSG00000261645	DISC1FP1	DISC1 fusion partner 1
NYC_18456	chr11	90319929	90320429	501	*	44.3068	-1.45484	0.550721	-2.64171	0.00824893	0.0473538	Intron (ENST00000649150.1/101929222, intron 1 of 7)	11	90251285	90863359	612075	1	101929222	ENST00000561596.5	68644	ENSG00000261645	DISC1FP1	DISC1 fusion partner 1
NYC_18457	chr11	90320668	90321168	501	*	53.0056	-1.91287	0.679804	-2.81385	0.00489521	0.032432	Intron (ENST00000649150.1/101929222, intron 1 of 7)	11	90251285	90863359	612075	1	101929222	ENST00000561596.5	69383	ENSG00000261645	DISC1FP1	DISC1 fusion partner 1
NYC_18458	chr11	90321573	90322073	501	*	41.908	-1.88109	0.570998	-3.2944	0.000986336	0.0122209	Intron (ENST00000649150.1/101929222, intron 1 of 7)	11	90251285	90863359	612075	1	101929222	ENST00000561596.5	70288	ENSG00000261645	DISC1FP1	DISC1 fusion partner 1
NYC_18459	chr11	90322149	90322649	501	*	38.6702	-1.92344	0.72303	-2.66026	0.00780814	0.0454989	Intron (ENST00000649150.1/101929222, intron 1 of 7)	11	90251285	90863359	612075	1	101929222	ENST00000561596.5	70864	ENSG00000261645	DISC1FP1	DISC1 fusion partner 1
NYC_18460	chr11	90322651	90323151	501	*	36.17	-1.75319	0.537959	-3.25896	0.00111823	0.0130267	Intron (ENST00000649150.1/101929222, intron 1 of 7)	11	90251285	90863359	612075	1	101929222	ENST00000561596.5	71366	ENSG00000261645	DISC1FP1	DISC1 fusion partner 1
NYC_18461	chr11	90323192	90323692	501	*	49.8675	-2.1011	0.639491	-3.28557	0.00101775	0.0124213	Intron (ENST00000649150.1/101929222, intron 1 of 7)	11	90251285	90863359	612075	1	101929222	ENST00000561596.5	71907	ENSG00000261645	DISC1FP1	DISC1 fusion partner 1
NYC_18462	chr11	90327971	90328471	501	*	55.4656	-1.75241	0.595628	-2.94212	0.00325977	0.024692	Intron (ENST00000649150.1/101929222, intron 1 of 7)	11	90251285	90863359	612075	1	101929222	ENST00000561596.5	76686	ENSG00000261645	DISC1FP1	DISC1 fusion partner 1
NYC_18463	chr11	90329010	90329510	501	*	52.0047	-1.88632	0.625534	-3.01554	0.00256525	0.0212631	Intron (ENST00000649150.1/101929222, intron 1 of 7)	11	90251285	90863359	612075	1	101929222	ENST00000561596.5	77725	ENSG00000261645	DISC1FP1	DISC1 fusion partner 1
NYC_18465	chr11	90333012	90333512	501	*	37.7874	-2.05209	0.716715	-2.86319	0.00419398	0.029223	Intron (ENST00000649150.1/101929222, intron 1 of 7)	11	90251285	90863359	612075	1	101929222	ENST00000561596.5	81727	ENSG00000261645	DISC1FP1	DISC1 fusion partner 1
NYC_18467	chr11	90334382	90334882	501	*	45.304	-2.06528	0.566257	-3.64724	0.000265075	0.00657666	Intron (ENST00000649150.1/101929222, intron 1 of 7)	11	90251285	90863359	612075	1	101929222	ENST00000561596.5	83097	ENSG00000261645	DISC1FP1	DISC1 fusion partner 1
NYC_18468	chr11	90335918	90336418	501	*	42.4711	-1.70824	0.530061	-3.22272	0.0012698	0.0140051	Intron (ENST00000649150.1/101929222, intron 1 of 7)	11	90251285	90863359	612075	1	101929222	ENST00000561596.5	84633	ENSG00000261645	DISC1FP1	DISC1 fusion partner 1
NYC_18470	chr11	90337894	90338394	501	*	32.9797	-2.35979	0.710914	-3.31937	0.000902211	0.0116672	Intron (ENST00000649150.1/101929222, intron 1 of 7)	11	90251285	90863359	612075	1	101929222	ENST00000561596.5	86609	ENSG00000261645	DISC1FP1	DISC1 fusion partner 1
NYC_18471	chr11	90339401	90339901	501	*	55.3292	-1.58568	0.498468	-3.1811	0.00146716	0.0152721	Intron (ENST00000649150.1/101929222, intron 1 of 7)	11	90251285	90863359	612075	1	101929222	ENST00000561596.5	88116	ENSG00000261645	DISC1FP1	DISC1 fusion partner 1
NYC_18472	chr11	90340440	90340940	501	*	44.3773	-2.2536	0.651147	-3.46097	0.000538232	0.00898564	Intron (ENST00000649150.1/101929222, intron 1 of 7)	11	90251285	90863359	612075	1	101929222	ENST00000561596.5	89155	ENSG00000261645	DISC1FP1	DISC1 fusion partner 1
NYC_18473	chr11	90341298	90341798	501	*	51.7843	-1.89991	0.593612	-3.20059	0.00137149	0.0146354	Intron (ENST00000649150.1/101929222, intron 1 of 7)	11	90251285	90863359	612075	1	101929222	ENST00000561596.5	90013	ENSG00000261645	DISC1FP1	DISC1 fusion partner 1
NYC_18474	chr11	90343076	90343576	501	*	49.7495	-1.92329	0.587383	-3.27434	0.0010591	0.0126325	Intron (ENST00000649150.1/101929222, intron 1 of 7)	11	90251285	90863359	612075	1	101929222	ENST00000561596.5	91791	ENSG00000261645	DISC1FP1	DISC1 fusion partner 1
NYC_18475	chr11	90343828	90344328	501	*	36.4284	-1.82835	0.567231	-3.22329	0.00126727	0.0139905	Intron (ENST00000649150.1/101929222, intron 1 of 7)	11	90251285	90863359	612075	1	101929222	ENST00000561596.5	92543	ENSG00000261645	DISC1FP1	DISC1 fusion partner 1
NYC_18477	chr11	90350544	90351044	501	*	47.9027	-1.98361	0.597391	-3.32046	0.000898706	0.0116427	Intron (ENST00000649150.1/101929222, intron 1 of 7)	11	90251285	90863359	612075	1	101929222	ENST00000561596.5	99259	ENSG00000261645	DISC1FP1	DISC1 fusion partner 1
NYC_18478	chr11	90351279	90351779	501	*	50.0947	-1.51598	0.566054	-2.67816	0.00740274	0.0437345	Intron (ENST00000649150.1/101929222, intron 1 of 7)	11	90251285	90863359	612075	1	101929222	ENST00000561596.5	99994	ENSG00000261645	DISC1FP1	DISC1 fusion partner 1
NYC_18479	chr11	90352216	90352716	501	*	71.6621	-1.78375	0.416438	-4.28335	1.84e-05	0.00236652	Intron (ENST00000649150.1/101929222, intron 1 of 7)	11	90251285	90863359	612075	1	101929222	ENST00000561596.5	100931	ENSG00000261645	DISC1FP1	DISC1 fusion partner 1
NYC_18480	chr11	90353195	90353695	501	*	64.1561	-1.80523	0.455605	-3.96228	7.42e-05	0.00390437	Intron (ENST00000649150.1/101929222, intron 1 of 7)	11	90251285	90863359	612075	1	101929222	ENST00000561596.5	101910	ENSG00000261645	DISC1FP1	DISC1 fusion partner 1
NYC_18481	chr11	90355159	90355659	501	*	44.5577	-1.89006	0.604139	-3.12853	0.00175686	0.0169201	Intron (ENST00000649150.1/101929222, intron 1 of 7)	11	90251285	90863359	612075	1	101929222	ENST00000561596.5	103874	ENSG00000261645	DISC1FP1	DISC1 fusion partner 1
NYC_18482	chr11	90356170	90356670	501	*	35.7924	-2.66024	0.594654	-4.47358	7.69e-06	0.00180201	Intron (ENST00000649150.1/101929222, intron 1 of 7)	11	90251285	90863359	612075	1	101929222	ENST00000561596.5	104885	ENSG00000261645	DISC1FP1	DISC1 fusion partner 1
NYC_18483	chr11	90358194	90358694	501	*	50.9676	-2.11035	0.594268	-3.55118	0.000383504	0.00774724	Intron (ENST00000649150.1/101929222, intron 1 of 7)	11	90251285	90863359	612075	1	101929222	ENST00000561596.5	106909	ENSG00000261645	DISC1FP1	DISC1 fusion partner 1
NYC_18484	chr11	90359033	90359533	501	*	43.863	-1.84189	0.674044	-2.7326	0.00628362	0.0387217	Intron (ENST00000649150.1/101929222, intron 1 of 7)	11	90251285	90863359	612075	1	101929222	ENST00000561596.5	107748	ENSG00000261645	DISC1FP1	DISC1 fusion partner 1
NYC_18485	chr11	90361700	90362200	501	*	44.7712	-1.86282	0.57848	-3.2202	0.00128101	0.014089	Intron (ENST00000649150.1/101929222, intron 2 of 7)	11	90251285	90863359	612075	1	101929222	ENST00000561596.5	110415	ENSG00000261645	DISC1FP1	DISC1 fusion partner 1
NYC_18486	chr11	90362318	90362818	501	*	43.3002	-1.74861	0.631609	-2.7685	0.00563151	0.0358641	Intron (ENST00000649150.1/101929222, intron 2 of 7)	11	90251285	90863359	612075	1	101929222	ENST00000561596.5	111033	ENSG00000261645	DISC1FP1	DISC1 fusion partner 1
NYC_18487	chr11	90363262	90363762	501	*	52.4551	-1.60178	0.568847	-2.81584	0.00486504	0.0322895	Intron (ENST00000649150.1/101929222, intron 2 of 7)	11	90251285	90863359	612075	1	101929222	ENST00000561596.5	111977	ENSG00000261645	DISC1FP1	DISC1 fusion partner 1
NYC_18489	chr11	90368197	90368697	501	*	44.9234	-1.56363	0.522681	-2.99156	0.00277559	0.0223309	Intron (ENST00000649150.1/101929222, intron 2 of 7)	11	90251285	90863359	612075	1	101929222	ENST00000561596.5	116912	ENSG00000261645	DISC1FP1	DISC1 fusion partner 1
NYC_18490	chr11	90368980	90369480	501	*	54.4605	-1.50759	0.498251	-3.02576	0.00248005	0.0208224	Intron (ENST00000649150.1/101929222, intron 2 of 7)	11	90251285	90863359	612075	1	101929222	ENST00000561596.5	117695	ENSG00000261645	DISC1FP1	DISC1 fusion partner 1
NYC_18491	chr11	90372025	90372525	501	*	61.2409	-1.94282	0.485522	-4.00151	6.29e-05	0.00367375	Intron (ENST00000649150.1/101929222, intron 2 of 7)	11	90489310	90863696	374387	1	101929222	ENST00000562678.5	-116785	ENSG00000261645	DISC1FP1	DISC1 fusion partner 1
NYC_18492	chr11	90373123	90373623	501	*	54.3122	-2.03577	0.496278	-4.10208	4.09e-05	0.00311079	Intron (ENST00000649150.1/101929222, intron 2 of 7)	11	90489310	90863696	374387	1	101929222	ENST00000562678.5	-115687	ENSG00000261645	DISC1FP1	DISC1 fusion partner 1
NYC_18493	chr11	90373950	90374450	501	*	48.1134	-1.9835	0.580248	-3.41836	0.000629991	0.00972739	Intron (ENST00000649150.1/101929222, intron 2 of 7)	11	90489310	90863696	374387	1	101929222	ENST00000562678.5	-114860	ENSG00000261645	DISC1FP1	DISC1 fusion partner 1
NYC_18494	chr11	90374690	90375190	501	*	66.6988	-1.54728	0.468154	-3.30506	0.000949544	0.0119953	Intron (ENST00000649150.1/101929222, intron 2 of 7)	11	90489310	90863696	374387	1	101929222	ENST00000562678.5	-114120	ENSG00000261645	DISC1FP1	DISC1 fusion partner 1
NYC_18496	chr11	90376310	90376810	501	*	37.0734	-2.01159	0.627097	-3.20778	0.00133765	0.0144198	Intron (ENST00000649150.1/101929222, intron 2 of 7)	11	90489310	90863696	374387	1	101929222	ENST00000562678.5	-112500	ENSG00000261645	DISC1FP1	DISC1 fusion partner 1
NYC_18497	chr11	90376906	90377406	501	*	37.6325	-1.89617	0.645803	-2.93614	0.00332325	0.025017	Intron (ENST00000649150.1/101929222, intron 2 of 7)	11	90489310	90863696	374387	1	101929222	ENST00000562678.5	-111904	ENSG00000261645	DISC1FP1	DISC1 fusion partner 1
NYC_18498	chr11	90377497	90377997	501	*	43.7421	-1.75818	0.598175	-2.93924	0.00329018	0.0248517	Intron (ENST00000649150.1/101929222, intron 2 of 7)	11	90489310	90863696	374387	1	101929222	ENST00000562678.5	-111313	ENSG00000261645	DISC1FP1	DISC1 fusion partner 1
NYC_18499	chr11	90378529	90379029	501	*	56.8057	-2.08268	0.599453	-3.47431	0.000512169	0.00874738	Intron (ENST00000649150.1/101929222, intron 2 of 7)	11	90489310	90863696	374387	1	101929222	ENST00000562678.5	-110281	ENSG00000261645	DISC1FP1	DISC1 fusion partner 1
NYC_18501	chr11	90380075	90380575	501	*	49.6337	-1.52031	0.490385	-3.10025	0.00193358	0.017874	Intron (ENST00000649150.1/101929222, intron 2 of 7)	11	90489310	90863696	374387	1	101929222	ENST00000562678.5	-108735	ENSG00000261645	DISC1FP1	DISC1 fusion partner 1
NYC_18502	chr11	90380619	90381119	501	*	42.7784	-1.73681	0.557228	-3.11688	0.00182778	0.017337	Intron (ENST00000649150.1/101929222, intron 2 of 7)	11	90489310	90863696	374387	1	101929222	ENST00000562678.5	-108191	ENSG00000261645	DISC1FP1	DISC1 fusion partner 1
NYC_18503	chr11	90381796	90382296	501	*	58.8332	-1.72951	0.538755	-3.2102	0.00132643	0.0143427	Intron (ENST00000649150.1/101929222, intron 2 of 7)	11	90489310	90863696	374387	1	101929222	ENST00000562678.5	-107014	ENSG00000261645	DISC1FP1	DISC1 fusion partner 1
NYC_18504	chr11	90382993	90383493	501	*	60.4909	-1.8403	0.485904	-3.78736	0.000152254	0.00517231	Intron (ENST00000649150.1/101929222, intron 2 of 7)	11	90489310	90863696	374387	1	101929222	ENST00000562678.5	-105817	ENSG00000261645	DISC1FP1	DISC1 fusion partner 1
NYC_18507	chr11	90385987	90386487	501	*	47.4317	-1.65292	0.564295	-2.92917	0.00339865	0.025387	Intron (ENST00000649150.1/101929222, intron 2 of 7)	11	90489310	90863696	374387	1	101929222	ENST00000562678.5	-102823	ENSG00000261645	DISC1FP1	DISC1 fusion partner 1
NYC_18508	chr11	90386571	90387071	501	*	44.5261	-1.85509	0.698883	-2.65436	0.0079458	0.046085	Intron (ENST00000649150.1/101929222, intron 2 of 7)	11	90489310	90863696	374387	1	101929222	ENST00000562678.5	-102239	ENSG00000261645	DISC1FP1	DISC1 fusion partner 1
NYC_18509	chr11	90387177	90387677	501	*	52.5553	-1.49071	0.549631	-2.7122	0.00668376	0.0405617	Intron (ENST00000649150.1/101929222, intron 2 of 7)	11	90489310	90863696	374387	1	101929222	ENST00000562678.5	-101633	ENSG00000261645	DISC1FP1	DISC1 fusion partner 1
NYC_18510	chr11	90389081	90389581	501	*	52.9263	-2.16435	0.514834	-4.20399	2.62e-05	0.00265662	Intron (ENST00000649150.1/101929222, intron 2 of 7)	11	90489310	90863696	374387	1	101929222	ENST00000562678.5	-99729	ENSG00000261645	DISC1FP1	DISC1 fusion partner 1
NYC_18511	chr11	90389921	90390421	501	*	50.3103	-2.26631	0.551635	-4.10835	3.99e-05	0.00307353	Intron (ENST00000649150.1/101929222, intron 2 of 7)	11	90489310	90863696	374387	1	101929222	ENST00000562678.5	-98889	ENSG00000261645	DISC1FP1	DISC1 fusion partner 1
NYC_18512	chr11	90390530	90391030	501	*	49.8245	-1.76405	0.580189	-3.04047	0.00236208	0.0201989	Intron (ENST00000649150.1/101929222, intron 2 of 7)	11	90489310	90863696	374387	1	101929222	ENST00000562678.5	-98280	ENSG00000261645	DISC1FP1	DISC1 fusion partner 1
NYC_18513	chr11	90391787	90392287	501	*	49.3502	-1.83697	0.464691	-3.95309	7.71e-05	0.00395812	Intron (ENST00000649150.1/101929222, intron 2 of 7)	11	90489310	90863696	374387	1	101929222	ENST00000562678.5	-97023	ENSG00000261645	DISC1FP1	DISC1 fusion partner 1
NYC_18514	chr11	90392369	90392869	501	*	41.5574	-1.66611	0.548103	-3.03978	0.00236754	0.0202239	Intron (ENST00000649150.1/101929222, intron 2 of 7)	11	90489310	90863696	374387	1	101929222	ENST00000562678.5	-96441	ENSG00000261645	DISC1FP1	DISC1 fusion partner 1
NYC_18515	chr11	90393384	90393884	501	*	56.9879	-2.19558	0.591193	-3.71381	0.000204165	0.00583356	Intron (ENST00000649150.1/101929222, intron 2 of 7)	11	90489310	90863696	374387	1	101929222	ENST00000562678.5	-95426	ENSG00000261645	DISC1FP1	DISC1 fusion partner 1
NYC_18516	chr11	90395369	90395869	501	*	51.6153	-1.9089	0.535119	-3.56723	0.000360768	0.00753086	Intron (ENST00000649150.1/101929222, intron 2 of 7)	11	90489310	90863696	374387	1	101929222	ENST00000562678.5	-93441	ENSG00000261645	DISC1FP1	DISC1 fusion partner 1
NYC_18517	chr11	90396002	90396502	501	*	29.9732	-2.22235	0.719131	-3.09033	0.00199933	0.0182376	Intron (ENST00000649150.1/101929222, intron 2 of 7)	11	90489310	90863696	374387	1	101929222	ENST00000562678.5	-92808	ENSG00000261645	DISC1FP1	DISC1 fusion partner 1
NYC_18518	chr11	90396743	90397243	501	*	38.6802	-2.15613	0.73285	-2.94212	0.00325974	0.024692	Intron (ENST00000649150.1/101929222, intron 2 of 7)	11	90489310	90863696	374387	1	101929222	ENST00000562678.5	-92067	ENSG00000261645	DISC1FP1	DISC1 fusion partner 1
NYC_18519	chr11	90397394	90397894	501	*	46.9779	-1.67794	0.590622	-2.84097	0.00449762	0.0306438	Intron (ENST00000649150.1/101929222, intron 2 of 7)	11	90489310	90863696	374387	1	101929222	ENST00000562678.5	-91416	ENSG00000261645	DISC1FP1	DISC1 fusion partner 1
NYC_18521	chr11	90399671	90400171	501	*	45.3107	-2.39717	0.650775	-3.68356	0.000230001	0.00620696	Intron (ENST00000649150.1/101929222, intron 2 of 7)	11	90489310	90863696	374387	1	101929222	ENST00000562678.5	-89139	ENSG00000261645	DISC1FP1	DISC1 fusion partner 1
NYC_18522	chr11	90406220	90406720	501	*	48.9169	-2.39879	0.664218	-3.61146	0.00030448	0.00698731	Intron (ENST00000649150.1/101929222, intron 2 of 7)	11	90489310	90863696	374387	1	101929222	ENST00000562678.5	-82590	ENSG00000261645	DISC1FP1	DISC1 fusion partner 1
NYC_18523	chr11	90407382	90407882	501	*	57.4829	-1.83609	0.549971	-3.33853	0.00084224	0.0112723	Intron (ENST00000649150.1/101929222, intron 2 of 7)	11	90489310	90863696	374387	1	101929222	ENST00000562678.5	-81428	ENSG00000261645	DISC1FP1	DISC1 fusion partner 1
NYC_18524	chr11	90408614	90409114	501	*	60.0354	-1.8684	0.52533	-3.55662	0.000375663	0.00765556	Intron (ENST00000649150.1/101929222, intron 2 of 7)	11	90489310	90863696	374387	1	101929222	ENST00000562678.5	-80196	ENSG00000261645	DISC1FP1	DISC1 fusion partner 1
NYC_18526	chr11	90410363	90410863	501	*	69.8541	-1.98605	0.432093	-4.59635	4.3e-06	0.00148409	Intron (ENST00000649150.1/101929222, intron 2 of 7)	11	90489310	90863696	374387	1	101929222	ENST00000562678.5	-78447	ENSG00000261645	DISC1FP1	DISC1 fusion partner 1
NYC_18527	chr11	90410968	90411468	501	*	53.9168	-2.10762	0.455477	-4.62728	3.7e-06	0.00141622	Intron (ENST00000649150.1/101929222, intron 2 of 7)	11	90489310	90863696	374387	1	101929222	ENST00000562678.5	-77842	ENSG00000261645	DISC1FP1	DISC1 fusion partner 1
NYC_18528	chr11	90411657	90412157	501	*	70.4068	-1.74988	0.419689	-4.16948	3.05e-05	0.00286433	Intron (ENST00000649150.1/101929222, intron 2 of 7)	11	90489310	90863696	374387	1	101929222	ENST00000562678.5	-77153	ENSG00000261645	DISC1FP1	DISC1 fusion partner 1
NYC_18531	chr11	90413913	90414413	501	*	65.7414	-1.71249	0.392383	-4.36435	1.28e-05	0.00207724	Intron (ENST00000649150.1/101929222, intron 2 of 7)	11	90489310	90863696	374387	1	101929222	ENST00000562678.5	-74897	ENSG00000261645	DISC1FP1	DISC1 fusion partner 1
NYC_18532	chr11	90414475	90414975	501	*	50.945	-1.85417	0.631006	-2.93843	0.00329884	0.0248902	Intron (ENST00000649150.1/101929222, intron 2 of 7)	11	90489310	90863696	374387	1	101929222	ENST00000562678.5	-74335	ENSG00000261645	DISC1FP1	DISC1 fusion partner 1
NYC_18534	chr11	90416701	90417201	501	*	54.1917	-1.77538	0.537614	-3.30233	0.000958843	0.012036	Intron (ENST00000649150.1/101929222, intron 2 of 7)	11	90489310	90863696	374387	1	101929222	ENST00000562678.5	-72109	ENSG00000261645	DISC1FP1	DISC1 fusion partner 1
NYC_18535	chr11	90417278	90417778	501	*	44.5658	-1.9694	0.70318	-2.8007	0.00509916	0.0334127	Intron (ENST00000649150.1/101929222, intron 2 of 7)	11	90489310	90863696	374387	1	101929222	ENST00000562678.5	-71532	ENSG00000261645	DISC1FP1	DISC1 fusion partner 1
NYC_18536	chr11	90418214	90418714	501	*	52.9686	-1.72958	0.539995	-3.20295	0.00136025	0.0145525	Intron (ENST00000649150.1/101929222, intron 2 of 7)	11	90489310	90863696	374387	1	101929222	ENST00000562678.5	-70596	ENSG00000261645	DISC1FP1	DISC1 fusion partner 1
NYC_18537	chr11	90418943	90419443	501	*	60.1333	-1.96894	0.556004	-3.54123	0.000398263	0.00782415	Intron (ENST00000649150.1/101929222, intron 2 of 7)	11	90489310	90863696	374387	1	101929222	ENST00000562678.5	-69867	ENSG00000261645	DISC1FP1	DISC1 fusion partner 1
NYC_18539	chr11	90420939	90421439	501	*	42.0652	-2.21874	0.800472	-2.77179	0.00557486	0.0356082	Intron (ENST00000649150.1/101929222, intron 2 of 7)	11	90489310	90863696	374387	1	101929222	ENST00000562678.5	-67871	ENSG00000261645	DISC1FP1	DISC1 fusion partner 1
NYC_18542	chr11	90423432	90423932	501	*	31.2537	-1.7694	0.645585	-2.74077	0.00612959	0.0380614	Intron (ENST00000649150.1/101929222, intron 2 of 7)	11	90489310	90863696	374387	1	101929222	ENST00000562678.5	-65378	ENSG00000261645	DISC1FP1	DISC1 fusion partner 1
NYC_18543	chr11	90423983	90424483	501	*	37.1471	-2.02588	0.634326	-3.19375	0.00140439	0.0148505	Intron (ENST00000649150.1/101929222, intron 2 of 7)	11	90489310	90863696	374387	1	101929222	ENST00000562678.5	-64827	ENSG00000261645	DISC1FP1	DISC1 fusion partner 1
NYC_18544	chr11	90424603	90425103	501	*	56.4979	-1.84814	0.465566	-3.96966	7.2e-05	0.00386613	Intron (ENST00000649150.1/101929222, intron 2 of 7)	11	90489310	90863696	374387	1	101929222	ENST00000562678.5	-64207	ENSG00000261645	DISC1FP1	DISC1 fusion partner 1
NYC_18545	chr11	90425776	90426276	501	*	70.9479	-2.17792	0.655621	-3.32192	0.000894	0.011612	Intron (ENST00000649150.1/101929222, intron 2 of 7)	11	90489310	90863696	374387	1	101929222	ENST00000562678.5	-63034	ENSG00000261645	DISC1FP1	DISC1 fusion partner 1
NYC_18547	chr11	90427021	90427521	501	*	43.8337	-1.6787	0.567316	-2.95901	0.00308626	0.0238725	Intron (ENST00000649150.1/101929222, intron 2 of 7)	11	90489310	90863696	374387	1	101929222	ENST00000562678.5	-61789	ENSG00000261645	DISC1FP1	DISC1 fusion partner 1
NYC_18550	chr11	90429617	90430117	501	*	51.2243	-1.82157	0.520751	-3.49796	0.000468836	0.00840462	Intron (ENST00000649150.1/101929222, intron 2 of 7)	11	90489310	90863696	374387	1	101929222	ENST00000562678.5	-59193	ENSG00000261645	DISC1FP1	DISC1 fusion partner 1
NYC_18551	chr11	90430973	90431473	501	*	54.9567	-2.02294	0.599342	-3.37526	0.000737451	0.0104926	Intron (ENST00000649150.1/101929222, intron 2 of 7)	11	90489310	90863696	374387	1	101929222	ENST00000562678.5	-57837	ENSG00000261645	DISC1FP1	DISC1 fusion partner 1
NYC_18552	chr11	90431957	90432457	501	*	48.1084	-1.8713	0.661285	-2.82979	0.00465779	0.0313253	Intron (ENST00000649150.1/101929222, intron 2 of 7)	11	90489310	90863696	374387	1	101929222	ENST00000562678.5	-56853	ENSG00000261645	DISC1FP1	DISC1 fusion partner 1
NYC_18553	chr11	90432464	90432964	501	*	54.7393	-1.35018	0.429082	-3.14667	0.00165142	0.0162289	Intron (ENST00000649150.1/101929222, intron 2 of 7)	11	90489310	90863696	374387	1	101929222	ENST00000562678.5	-56346	ENSG00000261645	DISC1FP1	DISC1 fusion partner 1
NYC_18554	chr11	90433204	90433704	501	*	65.1941	-2.00461	0.429076	-4.67193	2.98e-06	0.00126396	Intron (ENST00000649150.1/101929222, intron 2 of 7)	11	90489310	90863696	374387	1	101929222	ENST00000562678.5	-55606	ENSG00000261645	DISC1FP1	DISC1 fusion partner 1
NYC_18555	chr11	90434178	90434678	501	*	48.6396	-1.89396	0.568397	-3.3321	0.000861924	0.0113939	Intron (ENST00000649150.1/101929222, intron 2 of 7)	11	90489310	90863696	374387	1	101929222	ENST00000562678.5	-54632	ENSG00000261645	DISC1FP1	DISC1 fusion partner 1
NYC_18559	chr11	90438715	90439215	501	*	57.8121	-1.86029	0.50194	-3.7062	0.000210394	0.00592679	Intron (ENST00000649150.1/101929222, intron 2 of 7)	11	90489310	90863696	374387	1	101929222	ENST00000562678.5	-50095	ENSG00000261645	DISC1FP1	DISC1 fusion partner 1
NYC_18560	chr11	90439407	90439907	501	*	51.4489	-1.87659	0.59248	-3.16735	0.00153832	0.0156369	Intron (ENST00000649150.1/101929222, intron 2 of 7)	11	90489310	90863696	374387	1	101929222	ENST00000562678.5	-49403	ENSG00000261645	DISC1FP1	DISC1 fusion partner 1
NYC_18562	chr11	90441158	90441658	501	*	63.0386	-1.39862	0.467699	-2.99044	0.0027858	0.0223845	Intron (ENST00000649150.1/101929222, intron 2 of 7)	11	90489310	90863696	374387	1	101929222	ENST00000562678.5	-47652	ENSG00000261645	DISC1FP1	DISC1 fusion partner 1
NYC_18564	chr11	90442432	90442932	501	*	44.358	-2.21617	0.670651	-3.30451	0.000951436	0.0120048	Intron (ENST00000649150.1/101929222, intron 2 of 7)	11	90489310	90863696	374387	1	101929222	ENST00000562678.5	-46378	ENSG00000261645	DISC1FP1	DISC1 fusion partner 1
NYC_18565	chr11	90443490	90443990	501	*	50.9463	-1.99148	0.5544	-3.59214	0.000327968	0.00722861	Intron (ENST00000649150.1/101929222, intron 2 of 7)	11	90489310	90863696	374387	1	101929222	ENST00000562678.5	-45320	ENSG00000261645	DISC1FP1	DISC1 fusion partner 1
NYC_18566	chr11	90444835	90445335	501	*	52.6409	-2.08999	0.56716	-3.68501	0.000228692	0.0061846	Intron (ENST00000649150.1/101929222, intron 2 of 7)	11	90489310	90863696	374387	1	101929222	ENST00000562678.5	-43975	ENSG00000261645	DISC1FP1	DISC1 fusion partner 1
NYC_18568	chr11	90446100	90446600	501	*	42.2717	-2.21975	0.573731	-3.86898	0.000109294	0.00452695	Intron (ENST00000649150.1/101929222, intron 2 of 7)	11	90489310	90863696	374387	1	101929222	ENST00000562678.5	-42710	ENSG00000261645	DISC1FP1	DISC1 fusion partner 1
NYC_18570	chr11	90447643	90448143	501	*	35.0846	-1.77327	0.668154	-2.65399	0.00795464	0.0461172	Intron (ENST00000649150.1/101929222, intron 2 of 7)	11	90489310	90863696	374387	1	101929222	ENST00000562678.5	-41167	ENSG00000261645	DISC1FP1	DISC1 fusion partner 1
NYC_18571	chr11	90448514	90449014	501	*	47.1655	-1.6412	0.542713	-3.02407	0.00249402	0.0209146	Intron (ENST00000649150.1/101929222, intron 2 of 7)	11	90489310	90863696	374387	1	101929222	ENST00000562678.5	-40296	ENSG00000261645	DISC1FP1	DISC1 fusion partner 1
NYC_18572	chr11	90449472	90449972	501	*	50.1241	-2.0387	0.576232	-3.53798	0.000403201	0.00785842	Intron (ENST00000649150.1/101929222, intron 2 of 7)	11	90489310	90863696	374387	1	101929222	ENST00000562678.5	-39338	ENSG00000261645	DISC1FP1	DISC1 fusion partner 1
NYC_18573	chr11	90450322	90450822	501	*	50.1095	-1.66567	0.579306	-2.87529	0.00403657	0.0284632	Intron (ENST00000649150.1/101929222, intron 2 of 7)	11	90489310	90863696	374387	1	101929222	ENST00000562678.5	-38488	ENSG00000261645	DISC1FP1	DISC1 fusion partner 1
NYC_18574	chr11	90451144	90451644	501	*	46.223	-1.72071	0.620599	-2.77266	0.00555995	0.0355634	Intron (ENST00000649150.1/101929222, intron 2 of 7)	11	90489310	90863696	374387	1	101929222	ENST00000562678.5	-37666	ENSG00000261645	DISC1FP1	DISC1 fusion partner 1
NYC_18575	chr11	90451912	90452412	501	*	50.5405	-2.29925	0.650314	-3.5356	0.000406855	0.00790474	Intron (ENST00000649150.1/101929222, intron 2 of 7)	11	90489310	90863696	374387	1	101929222	ENST00000562678.5	-36898	ENSG00000261645	DISC1FP1	DISC1 fusion partner 1
NYC_18579	chr11	90456185	90456685	501	*	48.6102	-1.4635	0.486944	-3.00548	0.00265164	0.0216899	Intron (ENST00000649150.1/101929222, intron 2 of 7)	11	90489310	90863696	374387	1	101929222	ENST00000562678.5	-32625	ENSG00000261645	DISC1FP1	DISC1 fusion partner 1
NYC_18580	chr11	90456853	90457353	501	*	52.0223	-1.56761	0.488645	-3.20807	0.0013363	0.0144167	Intron (ENST00000649150.1/101929222, intron 2 of 7)	11	90489310	90863696	374387	1	101929222	ENST00000562678.5	-31957	ENSG00000261645	DISC1FP1	DISC1 fusion partner 1
NYC_18581	chr11	90457516	90458016	501	*	52.5938	-1.58028	0.474061	-3.33349	0.000857637	0.0113542	Intron (ENST00000649150.1/101929222, intron 2 of 7)	11	90489310	90863696	374387	1	101929222	ENST00000562678.5	-31294	ENSG00000261645	DISC1FP1	DISC1 fusion partner 1
NYC_18582	chr11	90458037	90458537	501	*	34.327	-2.47553	0.71822	-3.44676	0.000567358	0.00921969	Intron (ENST00000649150.1/101929222, intron 2 of 7)	11	90489310	90863696	374387	1	101929222	ENST00000562678.5	-30773	ENSG00000261645	DISC1FP1	DISC1 fusion partner 1
NYC_18583	chr11	90459706	90460206	501	*	50.5567	-1.76813	0.491936	-3.59422	0.000325359	0.00719906	Intron (ENST00000649150.1/101929222, intron 2 of 7)	11	90489310	90863696	374387	1	101929222	ENST00000562678.5	-29104	ENSG00000261645	DISC1FP1	DISC1 fusion partner 1
NYC_18584	chr11	90461031	90461531	501	*	37.7318	-2.40996	0.844409	-2.85402	0.00431698	0.0297575	Intron (ENST00000649150.1/101929222, intron 2 of 7)	11	90489310	90863696	374387	1	101929222	ENST00000562678.5	-27779	ENSG00000261645	DISC1FP1	DISC1 fusion partner 1
NYC_18585	chr11	90462366	90462866	501	*	49.5309	-2.09946	0.64846	-3.23761	0.00120534	0.0135956	Intron (ENST00000649150.1/101929222, intron 2 of 7)	11	90489310	90863696	374387	1	101929222	ENST00000562678.5	-26444	ENSG00000261645	DISC1FP1	DISC1 fusion partner 1
NYC_18587	chr11	90463575	90464075	501	*	28.4493	-1.80746	0.632177	-2.8591	0.00424839	0.0294839	Intron (ENST00000649150.1/101929222, intron 2 of 7)	11	90489310	90863696	374387	1	101929222	ENST00000562678.5	-25235	ENSG00000261645	DISC1FP1	DISC1 fusion partner 1
NYC_18588	chr11	90464086	90464586	501	*	34.1934	-2.17246	0.752395	-2.88739	0.00388454	0.0277693	Intron (ENST00000649150.1/101929222, intron 2 of 7)	11	90489310	90863696	374387	1	101929222	ENST00000562678.5	-24724	ENSG00000261645	DISC1FP1	DISC1 fusion partner 1
NYC_18590	chr11	90465637	90466137	501	*	47.1642	-1.90377	0.690586	-2.75675	0.00583783	0.0367689	Intron (ENST00000649150.1/101929222, intron 2 of 7)	11	90489310	90863696	374387	1	101929222	ENST00000562678.5	-23173	ENSG00000261645	DISC1FP1	DISC1 fusion partner 1
NYC_18591	chr11	90466223	90466723	501	*	40.9311	-2.1505	0.575066	-3.73958	0.000184331	0.00559334	Intron (ENST00000649150.1/101929222, intron 2 of 7)	11	90489310	90863696	374387	1	101929222	ENST00000562678.5	-22587	ENSG00000261645	DISC1FP1	DISC1 fusion partner 1
NYC_18592	chr11	90466757	90467257	501	*	44.1705	-1.88577	0.681159	-2.76847	0.00563197	0.0358641	Intron (ENST00000649150.1/101929222, intron 2 of 7)	11	90489310	90863696	374387	1	101929222	ENST00000562678.5	-22053	ENSG00000261645	DISC1FP1	DISC1 fusion partner 1
NYC_18593	chr11	90467723	90468223	501	*	58.4229	-1.98677	0.518381	-3.83264	0.000126778	0.00478341	Intron (ENST00000649150.1/101929222, intron 2 of 7)	11	90489310	90863696	374387	1	101929222	ENST00000562678.5	-21087	ENSG00000261645	DISC1FP1	DISC1 fusion partner 1
NYC_18596	chr11	90471364	90471864	501	*	43.0368	-1.6976	0.573303	-2.96109	0.00306551	0.0237646	Intron (ENST00000649150.1/101929222, intron 2 of 7)	11	90489310	90863696	374387	1	101929222	ENST00000562678.5	-17446	ENSG00000261645	DISC1FP1	DISC1 fusion partner 1
NYC_18597	chr11	90472083	90472583	501	*	41.48	-2.10129	0.703801	-2.98563	0.00282993	0.0225962	Intron (ENST00000649150.1/101929222, intron 2 of 7)	11	90489310	90863696	374387	1	101929222	ENST00000562678.5	-16727	ENSG00000261645	DISC1FP1	DISC1 fusion partner 1
NYC_18598	chr11	90473747	90474247	501	*	45.8189	-1.99186	0.648173	-3.07303	0.00211895	0.0188701	Intron (ENST00000649150.1/101929222, intron 2 of 7)	11	90489310	90863696	374387	1	101929222	ENST00000562678.5	-15063	ENSG00000261645	DISC1FP1	DISC1 fusion partner 1
NYC_18599	chr11	90474471	90474971	501	*	55.394	-2.13761	0.571939	-3.73749	0.000185867	0.00562094	Intron (ENST00000649150.1/101929222, intron 2 of 7)	11	90489310	90863696	374387	1	101929222	ENST00000562678.5	-14339	ENSG00000261645	DISC1FP1	DISC1 fusion partner 1
NYC_18600	chr11	90475354	90475854	501	*	58.6617	-1.29856	0.449196	-2.89085	0.00384205	0.027551	Intron (ENST00000649150.1/101929222, intron 2 of 7)	11	90489310	90863696	374387	1	101929222	ENST00000562678.5	-13456	ENSG00000261645	DISC1FP1	DISC1 fusion partner 1
NYC_18601	chr11	90476051	90476551	501	*	41.1741	-1.48717	0.548126	-2.71319	0.00666383	0.0404627	Intron (ENST00000649150.1/101929222, intron 2 of 7)	11	90489310	90863696	374387	1	101929222	ENST00000562678.5	-12759	ENSG00000261645	DISC1FP1	DISC1 fusion partner 1
NYC_18603	chr11	90477697	90478197	501	*	43.7328	-2.1384	0.63609	-3.36178	0.000774409	0.0107557	Intron (ENST00000649150.1/101929222, intron 2 of 7)	11	90489310	90863696	374387	1	101929222	ENST00000562678.5	-11113	ENSG00000261645	DISC1FP1	DISC1 fusion partner 1
NYC_18605	chr11	90479658	90480158	501	*	53.726	-2.07616	0.63779	-3.25524	0.00113295	0.0131414	Intron (ENST00000649150.1/101929222, intron 2 of 7)	11	90489310	90863696	374387	1	101929222	ENST00000562678.5	-9152	ENSG00000261645	DISC1FP1	DISC1 fusion partner 1
NYC_18606	chr11	90480629	90481129	501	*	58.1494	-1.88664	0.512964	-3.67791	0.000235149	0.00624186	Intron (ENST00000649150.1/101929222, intron 2 of 7)	11	90489310	90863696	374387	1	101929222	ENST00000562678.5	-8181	ENSG00000261645	DISC1FP1	DISC1 fusion partner 1
NYC_18607	chr11	90482349	90482849	501	*	36.2625	-2.14906	0.747989	-2.87311	0.00406449	0.0286023	Intron (ENST00000649150.1/101929222, intron 2 of 7)	11	90489310	90863696	374387	1	101929222	ENST00000562678.5	-6461	ENSG00000261645	DISC1FP1	DISC1 fusion partner 1
NYC_18608	chr11	90483015	90483515	501	*	45.8064	-2.16313	0.616349	-3.50959	0.000448806	0.00828794	Intron (ENST00000649150.1/101929222, intron 2 of 7)	11	90489310	90863696	374387	1	101929222	ENST00000562678.5	-5795	ENSG00000261645	DISC1FP1	DISC1 fusion partner 1
NYC_18610	chr11	90486123	90486623	501	*	58.1081	-2.2749	0.563872	-4.03442	5.47e-05	0.00344474	Promoter (2-3kb)	11	90489310	90863696	374387	1	101929222	ENST00000562678.5	-2687	ENSG00000261645	DISC1FP1	DISC1 fusion partner 1
NYC_18611	chr11	90486811	90487311	501	*	52.4589	-1.71047	0.550089	-3.10945	0.00187437	0.0175698	Promoter (1-2kb)	11	90489310	90863696	374387	1	101929222	ENST00000562678.5	-1999	ENSG00000261645	DISC1FP1	DISC1 fusion partner 1
NYC_18612	chr11	90488066	90488566	501	*	44.0484	-2.26875	0.650465	-3.48789	0.000486854	0.0085447	Promoter (<=1kb)	11	90489310	90863696	374387	1	101929222	ENST00000562678.5	-744	ENSG00000261645	DISC1FP1	DISC1 fusion partner 1
NYC_18613	chr11	90489183	90489683	501	*	59.4738	-1.79501	0.506599	-3.54325	0.000395224	0.00781074	Promoter (<=1kb)	11	90489310	90863696	374387	1	101929222	ENST00000562678.5	0	ENSG00000261645	DISC1FP1	DISC1 fusion partner 1
NYC_18615	chr11	90491129	90491629	501	*	61.7949	-2.04969	0.543324	-3.77251	0.000161616	0.00528177	Promoter (<=1kb)	11	90491719	90852657	360939	1	101929222	ENST00000563681.1	-90	ENSG00000261645	DISC1FP1	DISC1 fusion partner 1
NYC_18617	chr11	90493395	90493895	501	*	58.0875	-1.3979	0.461556	-3.02866	0.00245638	0.0206977	Promoter (1-2kb)	11	90491732	90802448	310717	1	101929222	ENST00000670926.1	1663	ENSG00000261645	DISC1FP1	DISC1 fusion partner 1
NYC_18619	chr11	90494814	90495314	501	*	71.9398	-1.82423	0.670159	-2.72209	0.00648708	0.0396738	Intron (ENST00000649150.1/101929222, intron 2 of 7)	11	90491732	90802448	310717	1	101929222	ENST00000670926.1	3082	ENSG00000261645	DISC1FP1	DISC1 fusion partner 1
NYC_18620	chr11	90495732	90496232	501	*	54.6998	-1.96563	0.485769	-4.04643	5.2e-05	0.00340139	Intron (ENST00000649150.1/101929222, intron 2 of 7)	11	90491732	90802448	310717	1	101929222	ENST00000670926.1	4000	ENSG00000261645	DISC1FP1	DISC1 fusion partner 1
NYC_18621	chr11	90498259	90498759	501	*	47.6621	-1.72989	0.623043	-2.77651	0.00549458	0.0352461	Intron (ENST00000649150.1/101929222, intron 2 of 7)	11	90491732	90802448	310717	1	101929222	ENST00000670926.1	6527	ENSG00000261645	DISC1FP1	DISC1 fusion partner 1
NYC_18622	chr11	90498962	90499462	501	*	44.6399	-2.29837	0.677551	-3.39218	0.000693392	0.0101583	Intron (ENST00000649150.1/101929222, intron 2 of 7)	11	90491732	90802448	310717	1	101929222	ENST00000670926.1	7230	ENSG00000261645	DISC1FP1	DISC1 fusion partner 1
NYC_18623	chr11	90500433	90500933	501	*	49.5956	-2.02916	0.628089	-3.2307	0.00123489	0.0137749	Intron (ENST00000649150.1/101929222, intron 2 of 7)	11	90491732	90802448	310717	1	101929222	ENST00000670926.1	8701	ENSG00000261645	DISC1FP1	DISC1 fusion partner 1
NYC_18624	chr11	90501152	90501652	501	*	53.6224	-1.55104	0.513906	-3.01814	0.00254332	0.0211472	Intron (ENST00000649150.1/101929222, intron 2 of 7)	11	90491732	90802448	310717	1	101929222	ENST00000670926.1	9420	ENSG00000261645	DISC1FP1	DISC1 fusion partner 1
NYC_18625	chr11	90501864	90502364	501	*	45.659	-2.15913	0.596939	-3.617	0.000298038	0.00692085	Intron (ENST00000649150.1/101929222, intron 2 of 7)	11	90491732	90802448	310717	1	101929222	ENST00000670926.1	10132	ENSG00000261645	DISC1FP1	DISC1 fusion partner 1
NYC_18627	chr11	90505170	90505670	501	*	47.3949	-1.68998	0.542728	-3.11387	0.00184653	0.0174244	Intron (ENST00000649150.1/101929222, intron 2 of 7)	11	90491732	90802448	310717	1	101929222	ENST00000670926.1	13438	ENSG00000261645	DISC1FP1	DISC1 fusion partner 1
NYC_18629	chr11	90507438	90507938	501	*	48.6931	-1.92976	0.541529	-3.56354	0.000365893	0.00757765	Intron (ENST00000649150.1/101929222, intron 2 of 7)	11	90491732	90802448	310717	1	101929222	ENST00000670926.1	15706	ENSG00000261645	DISC1FP1	DISC1 fusion partner 1
NYC_18630	chr11	90508714	90509214	501	*	56.4837	-1.71466	0.496115	-3.45618	0.000547887	0.00905447	Intron (ENST00000649150.1/101929222, intron 2 of 7)	11	90491732	90802448	310717	1	101929222	ENST00000670926.1	16982	ENSG00000261645	DISC1FP1	DISC1 fusion partner 1
NYC_18631	chr11	90509286	90509786	501	*	47.2053	-2.08691	0.65933	-3.16519	0.00154981	0.0156686	Intron (ENST00000649150.1/101929222, intron 2 of 7)	11	90491732	90802448	310717	1	101929222	ENST00000670926.1	17554	ENSG00000261645	DISC1FP1	DISC1 fusion partner 1
NYC_18632	chr11	90510889	90511389	501	*	55.0518	-1.58392	0.464114	-3.41278	0.000643042	0.00980295	Intron (ENST00000649150.1/101929222, intron 2 of 7)	11	90491732	90802448	310717	1	101929222	ENST00000670926.1	19157	ENSG00000261645	DISC1FP1	DISC1 fusion partner 1
NYC_18633	chr11	90511458	90511958	501	*	18.7372	-2.222	0.753113	-2.95043	0.00317333	0.024294	Intron (ENST00000649150.1/101929222, intron 2 of 7)	11	90491732	90802448	310717	1	101929222	ENST00000670926.1	19726	ENSG00000261645	DISC1FP1	DISC1 fusion partner 1
NYC_18634	chr11	90511986	90512486	501	*	50.2335	-1.44161	0.436878	-3.29981	0.000967513	0.0120779	Intron (ENST00000649150.1/101929222, intron 2 of 7)	11	90491732	90802448	310717	1	101929222	ENST00000670926.1	20254	ENSG00000261645	DISC1FP1	DISC1 fusion partner 1
NYC_18635	chr11	90512757	90513257	501	*	50.7707	-1.69825	0.574849	-2.95425	0.00313426	0.0240876	Intron (ENST00000649150.1/101929222, intron 2 of 7)	11	90491732	90802448	310717	1	101929222	ENST00000670926.1	21025	ENSG00000261645	DISC1FP1	DISC1 fusion partner 1
NYC_18636	chr11	90515063	90515563	501	*	60.5442	-1.92078	0.488396	-3.93283	8.4e-05	0.00408917	Intron (ENST00000649150.1/101929222, intron 2 of 7)	11	90491732	90802448	310717	1	101929222	ENST00000670926.1	23331	ENSG00000261645	DISC1FP1	DISC1 fusion partner 1
NYC_18637	chr11	90515602	90516102	501	*	39.9781	-2.00587	0.687285	-2.91854	0.00351672	0.0259768	Intron (ENST00000649150.1/101929222, intron 2 of 7)	11	90491732	90802448	310717	1	101929222	ENST00000670926.1	23870	ENSG00000261645	DISC1FP1	DISC1 fusion partner 1
NYC_18638	chr11	90516917	90517417	501	*	38.6598	-2.15478	0.81896	-2.63112	0.00851033	0.0484764	Intron (ENST00000649150.1/101929222, intron 2 of 7)	11	90491732	90802448	310717	1	101929222	ENST00000670926.1	25185	ENSG00000261645	DISC1FP1	DISC1 fusion partner 1
NYC_18639	chr11	90517986	90518486	501	*	46.6518	-1.93721	0.565583	-3.42516	0.000614434	0.00958898	Intron (ENST00000649150.1/101929222, intron 2 of 7)	11	90491732	90802448	310717	1	101929222	ENST00000670926.1	26254	ENSG00000261645	DISC1FP1	DISC1 fusion partner 1
NYC_18641	chr11	90519742	90520242	501	*	46.2854	-1.90828	0.546599	-3.49118	0.000480888	0.00850137	Intron (ENST00000649150.1/101929222, intron 2 of 7)	11	90491732	90802448	310717	1	101929222	ENST00000670926.1	28010	ENSG00000261645	DISC1FP1	DISC1 fusion partner 1
NYC_18642	chr11	90520699	90521199	501	*	38.9717	-2.1576	0.726049	-2.9717	0.00296155	0.0232259	Intron (ENST00000649150.1/101929222, intron 2 of 7)	11	90491732	90802448	310717	1	101929222	ENST00000670926.1	28967	ENSG00000261645	DISC1FP1	DISC1 fusion partner 1
NYC_18643	chr11	90522349	90522849	501	*	45.0698	-1.90548	0.687973	-2.7697	0.0056108	0.0357578	Intron (ENST00000649150.1/101929222, intron 2 of 7)	11	90491732	90802448	310717	1	101929222	ENST00000670926.1	30617	ENSG00000261645	DISC1FP1	DISC1 fusion partner 1
NYC_18644	chr11	90525831	90526331	501	*	43.5225	-2.09129	0.586619	-3.56498	0.000363877	0.0075611	Intron (ENST00000649150.1/101929222, intron 2 of 7)	11	90555774	90555857	84	2	100616186	ENST00000582647.1	29526	ENSG00000266703	MIR4490	microRNA 4490
NYC_18646	chr11	90526897	90527397	501	*	38.6114	-2.2865	0.579611	-3.94489	7.98e-05	0.0040219	Intron (ENST00000649150.1/101929222, intron 2 of 7)	11	90555774	90555857	84	2	100616186	ENST00000582647.1	28460	ENSG00000266703	MIR4490	microRNA 4490
NYC_18647	chr11	90527953	90528453	501	*	45.4219	-1.9034	0.548724	-3.46878	0.000522824	0.00884043	Intron (ENST00000649150.1/101929222, intron 2 of 7)	11	90555774	90555857	84	2	100616186	ENST00000582647.1	27404	ENSG00000266703	MIR4490	microRNA 4490
NYC_18648	chr11	90528526	90529026	501	*	59.3616	-1.43357	0.48591	-2.95028	0.00317491	0.0242961	Intron (ENST00000649150.1/101929222, intron 2 of 7)	11	90555774	90555857	84	2	100616186	ENST00000582647.1	26831	ENSG00000266703	MIR4490	microRNA 4490
NYC_18649	chr11	90529453	90529953	501	*	48.3729	-1.8473	0.48435	-3.81397	0.000136752	0.00492387	Intron (ENST00000649150.1/101929222, intron 2 of 7)	11	90555774	90555857	84	2	100616186	ENST00000582647.1	25904	ENSG00000266703	MIR4490	microRNA 4490
NYC_18650	chr11	90530057	90530557	501	*	35	-1.71464	0.528555	-3.24401	0.00117861	0.0134307	Intron (ENST00000649150.1/101929222, intron 2 of 7)	11	90555774	90555857	84	2	100616186	ENST00000582647.1	25300	ENSG00000266703	MIR4490	microRNA 4490
NYC_18651	chr11	90530935	90531435	501	*	52.4225	-1.89223	0.62785	-3.01382	0.0025798	0.0213426	Intron (ENST00000649150.1/101929222, intron 2 of 7)	11	90555774	90555857	84	2	100616186	ENST00000582647.1	24422	ENSG00000266703	MIR4490	microRNA 4490
NYC_18652	chr11	90531701	90532201	501	*	46.1309	-2.06584	0.671185	-3.07791	0.00208461	0.0186745	Intron (ENST00000649150.1/101929222, intron 2 of 7)	11	90555774	90555857	84	2	100616186	ENST00000582647.1	23656	ENSG00000266703	MIR4490	microRNA 4490
NYC_18653	chr11	90532273	90532773	501	*	40.0344	-1.87335	0.529672	-3.5368	0.000405	0.00788477	Intron (ENST00000649150.1/101929222, intron 2 of 7)	11	90555774	90555857	84	2	100616186	ENST00000582647.1	23084	ENSG00000266703	MIR4490	microRNA 4490
NYC_18654	chr11	90532976	90533476	501	*	70.7576	-1.73792	0.636384	-2.73093	0.00631565	0.0388635	Intron (ENST00000649150.1/101929222, intron 2 of 7)	11	90555774	90555857	84	2	100616186	ENST00000582647.1	22381	ENSG00000266703	MIR4490	microRNA 4490
NYC_18655	chr11	90534039	90534539	501	*	38.1168	-1.86281	0.679718	-2.74057	0.0061333	0.0380724	Intron (ENST00000649150.1/101929222, intron 2 of 7)	11	90555774	90555857	84	2	100616186	ENST00000582647.1	21318	ENSG00000266703	MIR4490	microRNA 4490
NYC_18657	chr11	90535564	90536064	501	*	58.3839	-1.74548	0.554007	-3.15064	0.00162916	0.0161121	Intron (ENST00000649150.1/101929222, intron 2 of 7)	11	90555774	90555857	84	2	100616186	ENST00000582647.1	19793	ENSG00000266703	MIR4490	microRNA 4490
NYC_18658	chr11	90536421	90536921	501	*	48.867	-1.69723	0.546865	-3.10357	0.00191202	0.0177658	Intron (ENST00000649150.1/101929222, intron 2 of 7)	11	90555774	90555857	84	2	100616186	ENST00000582647.1	18936	ENSG00000266703	MIR4490	microRNA 4490
NYC_18659	chr11	90537519	90538019	501	*	49.1511	-1.74829	0.371951	-4.70033	2.6e-06	0.00122397	Intron (ENST00000649150.1/101929222, intron 2 of 7)	11	90555774	90555857	84	2	100616186	ENST00000582647.1	17838	ENSG00000266703	MIR4490	microRNA 4490
NYC_18660	chr11	90538201	90538701	501	*	42.7701	-2.04144	0.740397	-2.75722	0.00582943	0.0367284	Intron (ENST00000649150.1/101929222, intron 2 of 7)	11	90555774	90555857	84	2	100616186	ENST00000582647.1	17156	ENSG00000266703	MIR4490	microRNA 4490
NYC_18662	chr11	90539632	90540132	501	*	35.7953	-2.13402	0.676314	-3.15537	0.00160297	0.0159661	Intron (ENST00000649150.1/101929222, intron 2 of 7)	11	90555774	90555857	84	2	100616186	ENST00000582647.1	15725	ENSG00000266703	MIR4490	microRNA 4490
NYC_18663	chr11	90541909	90542409	501	*	61.0233	-1.55125	0.387704	-4.00112	6.3e-05	0.00367585	Intron (ENST00000649150.1/101929222, intron 2 of 7)	11	90555774	90555857	84	2	100616186	ENST00000582647.1	13448	ENSG00000266703	MIR4490	microRNA 4490
NYC_18664	chr11	90542752	90543252	501	*	45.2566	-2.1224	0.516899	-4.10603	4.03e-05	0.00309168	Intron (ENST00000649150.1/101929222, intron 2 of 7)	11	90555774	90555857	84	2	100616186	ENST00000582647.1	12605	ENSG00000266703	MIR4490	microRNA 4490
NYC_18665	chr11	90543487	90543987	501	*	43.8052	-2.26625	0.785295	-2.88586	0.00390345	0.0278618	Intron (ENST00000649150.1/101929222, intron 2 of 7)	11	90555774	90555857	84	2	100616186	ENST00000582647.1	11870	ENSG00000266703	MIR4490	microRNA 4490
NYC_18666	chr11	90544532	90545032	501	*	56.5067	-1.51033	0.426275	-3.54309	0.000395475	0.00781074	Intron (ENST00000649150.1/101929222, intron 2 of 7)	11	90555774	90555857	84	2	100616186	ENST00000582647.1	10825	ENSG00000266703	MIR4490	microRNA 4490
NYC_18669	chr11	90551370	90551870	501	*	60.0599	-1.66269	0.445801	-3.72966	0.000191735	0.0056975	Intron (ENST00000649150.1/101929222, intron 3 of 7)	11	90555774	90555857	84	2	100616186	ENST00000582647.1	3987	ENSG00000266703	MIR4490	microRNA 4490
NYC_18670	chr11	90552257	90552757	501	*	39.4372	-2.18748	0.715919	-3.05549	0.00224696	0.0195618	Intron (ENST00000649150.1/101929222, intron 3 of 7)	11	90555774	90555857	84	2	100616186	ENST00000582647.1	3100	ENSG00000266703	MIR4490	microRNA 4490
NYC_18671	chr11	90553629	90554129	501	*	31.6517	-2.13425	0.726459	-2.93788	0.00330464	0.0249138	Promoter (1-2kb)	11	90555774	90555857	84	2	100616186	ENST00000582647.1	1728	ENSG00000266703	MIR4490	microRNA 4490
NYC_18672	chr11	90554150	90554650	501	*	49.7032	-1.61949	0.586692	-2.76037	0.00577353	0.0364624	Promoter (1-2kb)	11	90555774	90555857	84	2	100616186	ENST00000582647.1	1207	ENSG00000266703	MIR4490	microRNA 4490
NYC_18674	chr11	90557630	90558130	501	*	60.214	-1.28848	0.439324	-2.93288	0.00335835	0.0252017	Promoter (1-2kb)	11	90555774	90555857	84	2	100616186	ENST00000582647.1	-1773	ENSG00000266703	MIR4490	microRNA 4490
NYC_18676	chr11	90559093	90559593	501	*	32.0533	-1.95443	0.687796	-2.84158	0.00448907	0.0306168	Intron (ENST00000649150.1/101929222, intron 3 of 7)	11	90555774	90555857	84	2	100616186	ENST00000582647.1	-3236	ENSG00000266703	MIR4490	microRNA 4490
NYC_18677	chr11	90560411	90560911	501	*	46.1804	-2.17193	0.606262	-3.5825	0.000340326	0.00733486	Intron (ENST00000649150.1/101929222, intron 3 of 7)	11	90555774	90555857	84	2	100616186	ENST00000582647.1	-4554	ENSG00000266703	MIR4490	microRNA 4490
NYC_18679	chr11	90565659	90566159	501	*	55.2135	-1.8314	0.527122	-3.47433	0.000512123	0.00874738	Intron (ENST00000649150.1/101929222, intron 3 of 7)	11	90555774	90555857	84	2	100616186	ENST00000582647.1	-9802	ENSG00000266703	MIR4490	microRNA 4490
NYC_18680	chr11	90566496	90566996	501	*	48.5529	-2.06883	0.66466	-3.11262	0.00185434	0.017459	Intron (ENST00000649150.1/101929222, intron 3 of 7)	11	90555774	90555857	84	2	100616186	ENST00000582647.1	-10639	ENSG00000266703	MIR4490	microRNA 4490
NYC_18681	chr11	90571379	90571879	501	*	61.0327	-2.01026	0.524377	-3.83362	0.000126272	0.00478048	Intron (ENST00000649150.1/101929222, intron 3 of 7)	11	90555774	90555857	84	2	100616186	ENST00000582647.1	-15522	ENSG00000266703	MIR4490	microRNA 4490
NYC_18683	chr11	90575551	90576051	501	*	40.7233	-2.2066	0.671532	-3.28592	0.0010165	0.0124213	Intron (ENST00000649150.1/101929222, intron 3 of 7)	11	90555774	90555857	84	2	100616186	ENST00000582647.1	-19694	ENSG00000266703	MIR4490	microRNA 4490
NYC_18684	chr11	90576719	90577219	501	*	45.5696	-2.28736	0.546533	-4.18522	2.85e-05	0.00276564	Intron (ENST00000649150.1/101929222, intron 3 of 7)	11	90555774	90555857	84	2	100616186	ENST00000582647.1	-20862	ENSG00000266703	MIR4490	microRNA 4490
NYC_18685	chr11	90577344	90577844	501	*	39.9366	-1.8251	0.587258	-3.10783	0.00188467	0.0176141	Intron (ENST00000649150.1/101929222, intron 3 of 7)	11	90555774	90555857	84	2	100616186	ENST00000582647.1	-21487	ENSG00000266703	MIR4490	microRNA 4490
NYC_18686	chr11	90578895	90579395	501	*	39.9611	-2.11154	0.605905	-3.48493	0.000492271	0.0085887	Intron (ENST00000649150.1/101929222, intron 3 of 7)	11	90555774	90555857	84	2	100616186	ENST00000582647.1	-23038	ENSG00000266703	MIR4490	microRNA 4490
NYC_18687	chr11	90582426	90582926	501	*	42.0195	-1.74369	0.582961	-2.99109	0.0027798	0.0223491	Intron (ENST00000649150.1/101929222, intron 3 of 7)	11	90555774	90555857	84	2	100616186	ENST00000582647.1	-26569	ENSG00000266703	MIR4490	microRNA 4490
NYC_18688	chr11	90583005	90583505	501	*	50.4222	-1.62545	0.542144	-2.99818	0.00271596	0.0220354	Intron (ENST00000649150.1/101929222, intron 3 of 7)	11	90555774	90555857	84	2	100616186	ENST00000582647.1	-27148	ENSG00000266703	MIR4490	microRNA 4490
NYC_18689	chr11	90585653	90586153	501	*	43.5009	-2.14554	0.732211	-2.93023	0.00338715	0.0253242	Intron (ENST00000649150.1/101929222, intron 3 of 7)	11	90555774	90555857	84	2	100616186	ENST00000582647.1	-29796	ENSG00000266703	MIR4490	microRNA 4490
NYC_18690	chr11	90586861	90587361	501	*	36.7702	-2.03152	0.593637	-3.42216	0.000621254	0.00964235	Intron (ENST00000649150.1/101929222, intron 3 of 7)	11	90555774	90555857	84	2	100616186	ENST00000582647.1	-31004	ENSG00000266703	MIR4490	microRNA 4490
NYC_18691	chr11	90589241	90589741	501	*	38.3872	-2.36695	0.665579	-3.55622	0.000376228	0.00765855	Intron (ENST00000649150.1/101929222, intron 3 of 7)	11	90555774	90555857	84	2	100616186	ENST00000582647.1	-33384	ENSG00000266703	MIR4490	microRNA 4490
NYC_18692	chr11	90590296	90590796	501	*	40.8137	-2.43221	0.656934	-3.70236	0.000213602	0.00597398	Intron (ENST00000649150.1/101929222, intron 3 of 7)	11	90555774	90555857	84	2	100616186	ENST00000582647.1	-34439	ENSG00000266703	MIR4490	microRNA 4490
NYC_18694	chr11	90593126	90593626	501	*	46.8975	-1.72993	0.580084	-2.98221	0.0028618	0.0227499	Intron (ENST00000649150.1/101929222, intron 3 of 7)	11	90555774	90555857	84	2	100616186	ENST00000582647.1	-37269	ENSG00000266703	MIR4490	microRNA 4490
NYC_18695	chr11	90593860	90594360	501	*	53.3246	-1.82306	0.520279	-3.50401	0.000458302	0.00834208	Intron (ENST00000649150.1/101929222, intron 3 of 7)	11	90555774	90555857	84	2	100616186	ENST00000582647.1	-38003	ENSG00000266703	MIR4490	microRNA 4490
NYC_18696	chr11	90594964	90595464	501	*	52.943	-1.6346	0.532481	-3.06979	0.00214211	0.0189911	Intron (ENST00000649150.1/101929222, intron 3 of 7)	11	90555774	90555857	84	2	100616186	ENST00000582647.1	-39107	ENSG00000266703	MIR4490	microRNA 4490
NYC_18697	chr11	90596598	90597098	501	*	48.9192	-1.85225	0.651142	-2.84462	0.00444645	0.030384	Intron (ENST00000649150.1/101929222, intron 3 of 7)	11	90555774	90555857	84	2	100616186	ENST00000582647.1	-40741	ENSG00000266703	MIR4490	microRNA 4490
NYC_18698	chr11	90601311	90601811	501	*	45.4172	-1.82981	0.465732	-3.92888	8.53e-05	0.00409218	Intron (ENST00000649150.1/101929222, intron 3 of 7)	11	90555774	90555857	84	2	100616186	ENST00000582647.1	-45454	ENSG00000266703	MIR4490	microRNA 4490
NYC_18700	chr11	90602850	90603350	501	*	38.8898	-2.08474	0.730289	-2.85468	0.00430803	0.0297287	Exon (ENST00000562245.5/101929222, exon 3 of 7)	11	90555774	90555857	84	2	100616186	ENST00000582647.1	-46993	ENSG00000266703	MIR4490	microRNA 4490
NYC_18702	chr11	90604791	90605291	501	*	36.5187	-2.56761	0.653862	-3.92683	8.61e-05	0.00410388	Intron (ENST00000649150.1/101929222, intron 3 of 7)	11	90555774	90555857	84	2	100616186	ENST00000582647.1	-48934	ENSG00000266703	MIR4490	microRNA 4490
NYC_18703	chr11	90606074	90606574	501	*	44.7869	-1.98505	0.687156	-2.88878	0.00386735	0.0276748	Intron (ENST00000649150.1/101929222, intron 3 of 7)	11	90555774	90555857	84	2	100616186	ENST00000582647.1	-50217	ENSG00000266703	MIR4490	microRNA 4490
NYC_18704	chr11	90608936	90609436	501	*	47.8501	-1.90817	0.44711	-4.26778	1.97e-05	0.002421	Intron (ENST00000649150.1/101929222, intron 3 of 7)	11	90555774	90555857	84	2	100616186	ENST00000582647.1	-53079	ENSG00000266703	MIR4490	microRNA 4490
NYC_18705	chr11	90611663	90612163	501	*	43.033	-2.05863	0.76692	-2.68428	0.00726854	0.0431139	Intron (ENST00000649150.1/101929222, intron 3 of 7)	11	90555774	90555857	84	2	100616186	ENST00000582647.1	-55806	ENSG00000266703	MIR4490	microRNA 4490
NYC_18706	chr11	90612859	90613359	501	*	52.5013	-1.5736	0.507984	-3.09773	0.0019501	0.0179496	Intron (ENST00000649150.1/101929222, intron 3 of 7)	11	90555774	90555857	84	2	100616186	ENST00000582647.1	-57002	ENSG00000266703	MIR4490	microRNA 4490
NYC_18707	chr11	90617400	90617900	501	*	44.0235	-1.92919	0.567977	-3.39661	0.000682265	0.010082	Intron (ENST00000649150.1/101929222, intron 3 of 7)	11	90555774	90555857	84	2	100616186	ENST00000582647.1	-61543	ENSG00000266703	MIR4490	microRNA 4490
NYC_18708	chr11	90619701	90620201	501	*	51.0177	-1.83469	0.625813	-2.93169	0.00337118	0.0252435	Intron (ENST00000649150.1/101929222, intron 3 of 7)	11	90555774	90555857	84	2	100616186	ENST00000582647.1	-63844	ENSG00000266703	MIR4490	microRNA 4490
NYC_18709	chr11	90621552	90622052	501	*	38.6182	-2.02312	0.732881	-2.7605	0.00577132	0.0364526	Intron (ENST00000649150.1/101929222, intron 3 of 7)	11	90555774	90555857	84	2	100616186	ENST00000582647.1	-65695	ENSG00000266703	MIR4490	microRNA 4490
NYC_18710	chr11	90622209	90622709	501	*	41.2977	-1.80684	0.668077	-2.70453	0.00684004	0.041229	Intron (ENST00000649150.1/101929222, intron 3 of 7)	11	90555774	90555857	84	2	100616186	ENST00000582647.1	-66352	ENSG00000266703	MIR4490	microRNA 4490
NYC_18711	chr11	90623824	90624324	501	*	46.7633	-1.91367	0.656559	-2.91469	0.00356039	0.0261715	Intron (ENST00000649150.1/101929222, intron 3 of 7)	11	90555774	90555857	84	2	100616186	ENST00000582647.1	-67967	ENSG00000266703	MIR4490	microRNA 4490
NYC_18712	chr11	90626099	90626599	501	*	49.1216	-2.18861	0.535835	-4.08448	4.42e-05	0.00319553	Intron (ENST00000649150.1/101929222, intron 3 of 7)	11	90555774	90555857	84	2	100616186	ENST00000582647.1	-70242	ENSG00000266703	MIR4490	microRNA 4490
NYC_18713	chr11	90626898	90627398	501	*	43.5634	-1.83412	0.567185	-3.23373	0.00122184	0.0137107	Intron (ENST00000649150.1/101929222, intron 3 of 7)	11	90555774	90555857	84	2	100616186	ENST00000582647.1	-71041	ENSG00000266703	MIR4490	microRNA 4490
NYC_18714	chr11	90627762	90628262	501	*	50.7639	-2.06232	0.646486	-3.19005	0.0014225	0.014974	Intron (ENST00000649150.1/101929222, intron 3 of 7)	11	90555774	90555857	84	2	100616186	ENST00000582647.1	-71905	ENSG00000266703	MIR4490	microRNA 4490
NYC_18715	chr11	90628752	90629252	501	*	37.6228	-2.11398	0.704649	-3.00004	0.00269942	0.0219389	Intron (ENST00000649150.1/101929222, intron 3 of 7)	11	90555774	90555857	84	2	100616186	ENST00000582647.1	-72895	ENSG00000266703	MIR4490	microRNA 4490
NYC_18717	chr11	90630567	90631067	501	*	40.3885	-2.32232	0.587837	-3.95062	7.79e-05	0.00396278	Intron (ENST00000649150.1/101929222, intron 3 of 7)	11	90555774	90555857	84	2	100616186	ENST00000582647.1	-74710	ENSG00000266703	MIR4490	microRNA 4490
NYC_18718	chr11	90632949	90633449	501	*	54.8895	-2.42424	0.535397	-4.52794	5.96e-06	0.00164006	Intron (ENST00000649150.1/101929222, intron 3 of 7)	11	90555774	90555857	84	2	100616186	ENST00000582647.1	-77092	ENSG00000266703	MIR4490	microRNA 4490
NYC_18719	chr11	90634053	90634553	501	*	44.9661	-1.06339	0.379684	-2.80072	0.00509884	0.0334127	Intron (ENST00000649150.1/101929222, intron 3 of 7)	11	90555774	90555857	84	2	100616186	ENST00000582647.1	-78196	ENSG00000266703	MIR4490	microRNA 4490
NYC_18720	chr11	90634612	90635112	501	*	36.0799	-1.91375	0.684151	-2.79727	0.00515363	0.0336732	Intron (ENST00000649150.1/101929222, intron 3 of 7)	11	90555774	90555857	84	2	100616186	ENST00000582647.1	-78755	ENSG00000266703	MIR4490	microRNA 4490
NYC_18721	chr11	90635425	90635925	501	*	35.6796	-1.78823	0.569715	-3.13882	0.0016963	0.0165104	Intron (ENST00000649150.1/101929222, intron 3 of 7)	11	90555774	90555857	84	2	100616186	ENST00000582647.1	-79568	ENSG00000266703	MIR4490	microRNA 4490
NYC_18723	chr11	90638492	90638992	501	*	49.979	-2.21227	0.562497	-3.93293	8.39e-05	0.00408917	Intron (ENST00000649150.1/101929222, intron 3 of 7)	11	90555774	90555857	84	2	100616186	ENST00000582647.1	-82635	ENSG00000266703	MIR4490	microRNA 4490
NYC_18725	chr11	90640103	90640603	501	*	36.0014	-1.6804	0.612078	-2.7454	0.00604373	0.0376837	Intron (ENST00000649150.1/101929222, intron 3 of 7)	11	90555774	90555857	84	2	100616186	ENST00000582647.1	-84246	ENSG00000266703	MIR4490	microRNA 4490
NYC_18726	chr11	90640925	90641425	501	*	45.8865	-1.95228	0.55652	-3.50801	0.000451473	0.00830701	Intron (ENST00000649150.1/101929222, intron 3 of 7)	11	90555774	90555857	84	2	100616186	ENST00000582647.1	-85068	ENSG00000266703	MIR4490	microRNA 4490
NYC_18728	chr11	90643768	90644268	501	*	43.0422	-2.08753	0.634538	-3.28983	0.00100247	0.0123062	Intron (ENST00000649150.1/101929222, intron 3 of 7)	11	90555774	90555857	84	2	100616186	ENST00000582647.1	-87911	ENSG00000266703	MIR4490	microRNA 4490
NYC_18729	chr11	90644483	90644983	501	*	56.5203	-1.68789	0.479983	-3.51656	0.000437176	0.00817577	Intron (ENST00000649150.1/101929222, intron 3 of 7)	11	90555774	90555857	84	2	100616186	ENST00000582647.1	-88626	ENSG00000266703	MIR4490	microRNA 4490
NYC_18730	chr11	90645288	90645788	501	*	35.0346	-2.0985	0.670004	-3.13207	0.00173581	0.0167839	Intron (ENST00000649150.1/101929222, intron 3 of 7)	11	90555774	90555857	84	2	100616186	ENST00000582647.1	-89431	ENSG00000266703	MIR4490	microRNA 4490
NYC_18733	chr11	90648459	90648959	501	*	47.267	-2.10913	0.726244	-2.90416	0.00368236	0.0267654	Intron (ENST00000649150.1/101929222, intron 3 of 7)	11	90555774	90555857	84	2	100616186	ENST00000582647.1	-92602	ENSG00000266703	MIR4490	microRNA 4490
NYC_18734	chr11	90649534	90650034	501	*	46.4244	-2.10592	0.714287	-2.94829	0.00319541	0.0243962	Intron (ENST00000649150.1/101929222, intron 3 of 7)	11	90555774	90555857	84	2	100616186	ENST00000582647.1	-93677	ENSG00000266703	MIR4490	microRNA 4490
NYC_18735	chr11	90650560	90651060	501	*	55.8446	-1.5921	0.549356	-2.89813	0.003754	0.0271253	Intron (ENST00000649150.1/101929222, intron 3 of 7)	11	90555774	90555857	84	2	100616186	ENST00000582647.1	-94703	ENSG00000266703	MIR4490	microRNA 4490
NYC_18736	chr11	90652918	90653418	501	*	51.3057	-1.58371	0.604752	-2.61878	0.00882454	0.0497715	Intron (ENST00000649150.1/101929222, intron 3 of 7)	11	90555774	90555857	84	2	100616186	ENST00000582647.1	-97061	ENSG00000266703	MIR4490	microRNA 4490
NYC_18737	chr11	90653536	90654036	501	*	35.79	-2.19135	0.77473	-2.82853	0.00467621	0.0314064	Intron (ENST00000649150.1/101929222, intron 3 of 7)	11	90555774	90555857	84	2	100616186	ENST00000582647.1	-97679	ENSG00000266703	MIR4490	microRNA 4490
NYC_18738	chr11	90654511	90655011	501	*	49.5694	-1.86199	0.600131	-3.10265	0.00191797	0.017794	Intron (ENST00000649150.1/101929222, intron 3 of 7)	11	90555774	90555857	84	2	100616186	ENST00000582647.1	-98654	ENSG00000266703	MIR4490	microRNA 4490
NYC_18740	chr11	90657278	90657778	501	*	38.2805	-2.20309	0.729593	-3.01962	0.00253091	0.0210911	Intron (ENST00000649150.1/101929222, intron 3 of 7)	11	90555774	90555857	84	2	100616186	ENST00000582647.1	-101421	ENSG00000266703	MIR4490	microRNA 4490
NYC_18741	chr11	90660375	90660875	501	*	45.1278	-1.91675	0.631032	-3.03748	0.00238569	0.0203369	Intron (ENST00000649150.1/101929222, intron 3 of 7)	11	90555774	90555857	84	2	100616186	ENST00000582647.1	-104518	ENSG00000266703	MIR4490	microRNA 4490
NYC_18742	chr11	90663462	90663962	501	*	45.7213	-1.65655	0.594238	-2.78768	0.00530862	0.0343854	Intron (ENST00000649150.1/101929222, intron 3 of 7)	11	90555774	90555857	84	2	100616186	ENST00000582647.1	-107605	ENSG00000266703	MIR4490	microRNA 4490
NYC_18743	chr11	90664441	90664941	501	*	42.1825	-1.52568	0.578445	-2.63755	0.00835061	0.047764	Intron (ENST00000649150.1/101929222, intron 3 of 7)	11	90555774	90555857	84	2	100616186	ENST00000582647.1	-108584	ENSG00000266703	MIR4490	microRNA 4490
NYC_18744	chr11	90665058	90665558	501	*	51.1177	-1.91269	0.513385	-3.72564	0.000194824	0.00572163	Intron (ENST00000649150.1/101929222, intron 3 of 7)	11	90555774	90555857	84	2	100616186	ENST00000582647.1	-109201	ENSG00000266703	MIR4490	microRNA 4490
NYC_18745	chr11	90666063	90666563	501	*	48.5984	-1.88742	0.633678	-2.97851	0.00289655	0.0229219	Intron (ENST00000649150.1/101929222, intron 3 of 7)	11	90555774	90555857	84	2	100616186	ENST00000582647.1	-110206	ENSG00000266703	MIR4490	microRNA 4490
NYC_18746	chr11	90667971	90668471	501	*	40.5102	-2.03543	0.618845	-3.28909	0.00100513	0.0123246	Intron (ENST00000649150.1/101929222, intron 3 of 7)	11	90555774	90555857	84	2	100616186	ENST00000582647.1	-112114	ENSG00000266703	MIR4490	microRNA 4490
NYC_18747	chr11	90668626	90669126	501	*	35.6601	-1.91582	0.637276	-3.00627	0.00264476	0.0216571	Intron (ENST00000649150.1/101929222, intron 3 of 7)	11	90555774	90555857	84	2	100616186	ENST00000582647.1	-112769	ENSG00000266703	MIR4490	microRNA 4490
NYC_18748	chr11	90669307	90669807	501	*	44.9811	-1.95471	0.607042	-3.22006	0.00128164	0.0140895	Intron (ENST00000649150.1/101929222, intron 3 of 7)	11	90555774	90555857	84	2	100616186	ENST00000582647.1	-113450	ENSG00000266703	MIR4490	microRNA 4490
NYC_18749	chr11	90670063	90670563	501	*	33.3103	-2.2634	0.576367	-3.92702	8.6e-05	0.00410388	Intron (ENST00000649150.1/101929222, intron 3 of 7)	11	90555774	90555857	84	2	100616186	ENST00000582647.1	-114206	ENSG00000266703	MIR4490	microRNA 4490
NYC_18750	chr11	90670699	90671199	501	*	57.9826	-2.24931	0.582214	-3.86338	0.00011183	0.00456333	Intron (ENST00000649150.1/101929222, intron 3 of 7)	11	90555774	90555857	84	2	100616186	ENST00000582647.1	-114842	ENSG00000266703	MIR4490	microRNA 4490
NYC_18751	chr11	90674470	90674970	501	*	53.1873	-1.71128	0.627046	-2.72911	0.00635061	0.0390485	Intron (ENST00000649150.1/101929222, intron 3 of 7)	11	90555774	90555857	84	2	100616186	ENST00000582647.1	-118613	ENSG00000266703	MIR4490	microRNA 4490
NYC_18753	chr11	90678319	90678819	501	*	52.1742	-2.20954	0.584619	-3.77946	0.000157171	0.00523679	Intron (ENST00000649150.1/101929222, intron 3 of 7)	11	90555774	90555857	84	2	100616186	ENST00000582647.1	-122462	ENSG00000266703	MIR4490	microRNA 4490
NYC_18754	chr11	90682444	90682944	501	*	68.0909	-1.6154	0.365539	-4.41923	9.91e-06	0.00195374	Intron (ENST00000649150.1/101929222, intron 3 of 7)	11	90555774	90555857	84	2	100616186	ENST00000582647.1	-126587	ENSG00000266703	MIR4490	microRNA 4490
NYC_18757	chr11	90692978	90693478	501	*	46.53	-1.74274	0.58763	-2.96571	0.00301984	0.0235247	Intron (ENST00000649150.1/101929222, intron 3 of 7)	11	90555774	90555857	84	2	100616186	ENST00000582647.1	-137121	ENSG00000266703	MIR4490	microRNA 4490
NYC_18758	chr11	90693853	90694353	501	*	74.3837	-1.59811	0.397453	-4.02089	5.8e-05	0.00353546	Intron (ENST00000649150.1/101929222, intron 3 of 7)	11	90555774	90555857	84	2	100616186	ENST00000582647.1	-137996	ENSG00000266703	MIR4490	microRNA 4490
NYC_18759	chr11	90694574	90695074	501	*	49.6212	-1.79145	0.505618	-3.5431	0.000395449	0.00781074	Intron (ENST00000649150.1/101929222, intron 3 of 7)	11	90555774	90555857	84	2	100616186	ENST00000582647.1	-138717	ENSG00000266703	MIR4490	microRNA 4490
NYC_18760	chr11	90695389	90695889	501	*	41.1033	-2.51807	0.791539	-3.18124	0.00146648	0.0152703	Intron (ENST00000649150.1/101929222, intron 3 of 7)	11	90555774	90555857	84	2	100616186	ENST00000582647.1	-139532	ENSG00000266703	MIR4490	microRNA 4490
NYC_18761	chr11	90696855	90697355	501	*	44.6555	-2.00187	0.741462	-2.6999	0.00693603	0.0416497	Intron (ENST00000649150.1/101929222, intron 3 of 7)	11	90555774	90555857	84	2	100616186	ENST00000582647.1	-140998	ENSG00000266703	MIR4490	microRNA 4490
NYC_18762	chr11	90697657	90698157	501	*	42.3072	-2.15526	0.669576	-3.21884	0.00128711	0.014123	Intron (ENST00000649150.1/101929222, intron 3 of 7)	11	90555774	90555857	84	2	100616186	ENST00000582647.1	-141800	ENSG00000266703	MIR4490	microRNA 4490
NYC_18763	chr11	90698484	90698984	501	*	58.2971	-1.2837	0.484829	-2.64773	0.00810334	0.0467469	Intron (ENST00000649150.1/101929222, intron 3 of 7)	11	90555774	90555857	84	2	100616186	ENST00000582647.1	-142627	ENSG00000266703	MIR4490	microRNA 4490
NYC_18764	chr11	90699284	90699784	501	*	37.857	-1.81852	0.608573	-2.98818	0.00280645	0.0224601	Intron (ENST00000649150.1/101929222, intron 3 of 7)	11	90555774	90555857	84	2	100616186	ENST00000582647.1	-143427	ENSG00000266703	MIR4490	microRNA 4490
NYC_18766	chr11	90701280	90701780	501	*	51.0247	-2.34955	0.600392	-3.91335	9.1e-05	0.00418222	Intron (ENST00000649150.1/101929222, intron 3 of 7)	11	90555774	90555857	84	2	100616186	ENST00000582647.1	-145423	ENSG00000266703	MIR4490	microRNA 4490
NYC_18767	chr11	90702500	90703000	501	*	39.9063	-1.75145	0.514288	-3.40559	0.000660219	0.00995932	Intron (ENST00000649150.1/101929222, intron 3 of 7)	11	90555774	90555857	84	2	100616186	ENST00000582647.1	-146643	ENSG00000266703	MIR4490	microRNA 4490
NYC_18768	chr11	90703040	90703540	501	*	38.8119	-1.53003	0.571299	-2.67816	0.00740288	0.0437345	Intron (ENST00000649150.1/101929222, intron 3 of 7)	11	90555774	90555857	84	2	100616186	ENST00000582647.1	-147183	ENSG00000266703	MIR4490	microRNA 4490
NYC_18774	chr11	90709184	90709684	501	*	42.5977	-2.23044	0.587566	-3.79607	0.000147006	0.0051028	Intron (ENST00000649150.1/101929222, intron 3 of 7)	11	90555774	90555857	84	2	100616186	ENST00000582647.1	-153327	ENSG00000266703	MIR4490	microRNA 4490
NYC_18775	chr11	90710553	90711053	501	*	46.6926	-1.72099	0.593395	-2.90024	0.00372878	0.0270069	Intron (ENST00000649150.1/101929222, intron 3 of 7)	11	90555774	90555857	84	2	100616186	ENST00000582647.1	-154696	ENSG00000266703	MIR4490	microRNA 4490
NYC_18776	chr11	90712806	90713306	501	*	35.202	-2.10177	0.729663	-2.88047	0.00397082	0.0281593	Intron (ENST00000649150.1/101929222, intron 3 of 7)	11	90869121	90869202	82	2	100302228	ENST00000408659.1	155896	ENSG00000221586	MIR1261	microRNA 1261
NYC_18777	chr11	90714980	90715480	501	*	46.2859	-1.99368	0.613607	-3.24911	0.00115766	0.0133127	Intron (ENST00000649150.1/101929222, intron 3 of 7)	11	90869121	90869202	82	2	100302228	ENST00000408659.1	153722	ENSG00000221586	MIR1261	microRNA 1261
NYC_18778	chr11	90717198	90717698	501	*	47.9091	-2.0723	0.648484	-3.1956	0.00139542	0.0148004	Intron (ENST00000649150.1/101929222, intron 3 of 7)	11	90869121	90869202	82	2	100302228	ENST00000408659.1	151504	ENSG00000221586	MIR1261	microRNA 1261
NYC_18779	chr11	90718527	90719027	501	*	51.3606	-1.70721	0.576248	-2.96263	0.00305026	0.0236825	Intron (ENST00000649150.1/101929222, intron 3 of 7)	11	90869121	90869202	82	2	100302228	ENST00000408659.1	150175	ENSG00000221586	MIR1261	microRNA 1261
NYC_18780	chr11	90721050	90721550	501	*	43.0418	-2.34438	0.604823	-3.87614	0.000106128	0.00448049	Intron (ENST00000649150.1/101929222, intron 3 of 7)	11	90869121	90869202	82	2	100302228	ENST00000408659.1	147652	ENSG00000221586	MIR1261	microRNA 1261
NYC_18782	chr11	90723060	90723560	501	*	39.2488	-1.72777	0.63354	-2.72716	0.0063882	0.0392193	Intron (ENST00000649150.1/101929222, intron 3 of 7)	11	90869121	90869202	82	2	100302228	ENST00000408659.1	145642	ENSG00000221586	MIR1261	microRNA 1261
NYC_18783	chr11	90727391	90727891	501	*	50.7892	-1.83743	0.56583	-3.24732	0.00116499	0.0133581	Intron (ENST00000649150.1/101929222, intron 3 of 7)	11	90869121	90869202	82	2	100302228	ENST00000408659.1	141311	ENSG00000221586	MIR1261	microRNA 1261
NYC_18784	chr11	90728952	90729452	501	*	50.9579	-1.83212	0.646136	-2.83551	0.00457532	0.0309496	Intron (ENST00000649150.1/101929222, intron 3 of 7)	11	90869121	90869202	82	2	100302228	ENST00000408659.1	139750	ENSG00000221586	MIR1261	microRNA 1261
NYC_18785	chr11	90731352	90731852	501	*	33.7242	-1.85109	0.693624	-2.66872	0.00761412	0.0446757	Exon (ENST00000623107.1/ENST00000623107.1, exon 1 of 1)	11	90869121	90869202	82	2	100302228	ENST00000408659.1	137350	ENSG00000221586	MIR1261	microRNA 1261
NYC_18787	chr11	90732499	90732999	501	*	36.0726	-2.16603	0.600461	-3.60727	0.000309436	0.00703077	Intron (ENST00000649150.1/101929222, intron 3 of 7)	11	90869121	90869202	82	2	100302228	ENST00000408659.1	136203	ENSG00000221586	MIR1261	microRNA 1261
NYC_18788	chr11	90733841	90734341	501	*	53.1197	-1.66876	0.513787	-3.24796	0.00116234	0.0133451	Intron (ENST00000649150.1/101929222, intron 3 of 7)	11	90869121	90869202	82	2	100302228	ENST00000408659.1	134861	ENSG00000221586	MIR1261	microRNA 1261
NYC_18789	chr11	90735430	90735930	501	*	46.7326	-2.23606	0.52979	-4.22065	2.44e-05	0.00259527	Intron (ENST00000649150.1/101929222, intron 3 of 7)	11	90869121	90869202	82	2	100302228	ENST00000408659.1	133272	ENSG00000221586	MIR1261	microRNA 1261
NYC_18790	chr11	90737202	90737702	501	*	50.0797	-1.64277	0.539736	-3.04366	0.00233718	0.0200658	Intron (ENST00000649150.1/101929222, intron 3 of 7)	11	90869121	90869202	82	2	100302228	ENST00000408659.1	131500	ENSG00000221586	MIR1261	microRNA 1261
NYC_18791	chr11	90738667	90739167	501	*	41.4451	-1.72595	0.637747	-2.70633	0.00680324	0.0411001	Intron (ENST00000649150.1/101929222, intron 3 of 7)	11	90869121	90869202	82	2	100302228	ENST00000408659.1	130035	ENSG00000221586	MIR1261	microRNA 1261
NYC_18792	chr11	90739733	90740233	501	*	46.8937	-1.98853	0.723219	-2.74956	0.0059676	0.0373088	Intron (ENST00000649150.1/101929222, intron 3 of 7)	11	90869121	90869202	82	2	100302228	ENST00000408659.1	128969	ENSG00000221586	MIR1261	microRNA 1261
NYC_18793	chr11	90740879	90741379	501	*	44.0633	-1.96074	0.60121	-3.26132	0.00110895	0.0129664	Intron (ENST00000649150.1/101929222, intron 3 of 7)	11	90869121	90869202	82	2	100302228	ENST00000408659.1	127823	ENSG00000221586	MIR1261	microRNA 1261
NYC_18794	chr11	90744865	90745365	501	*	57.8531	-1.49074	0.432194	-3.44924	0.000562161	0.00916988	Intron (ENST00000649150.1/101929222, intron 3 of 7)	11	90869121	90869202	82	2	100302228	ENST00000408659.1	123837	ENSG00000221586	MIR1261	microRNA 1261
NYC_18795	chr11	90745501	90746001	501	*	36.3294	-1.82692	0.549491	-3.32475	0.000884979	0.0115593	Intron (ENST00000649150.1/101929222, intron 3 of 7)	11	90869121	90869202	82	2	100302228	ENST00000408659.1	123201	ENSG00000221586	MIR1261	microRNA 1261
NYC_18798	chr11	90747985	90748485	501	*	46.6752	-1.43315	0.527258	-2.71812	0.00656538	0.0400128	Intron (ENST00000649150.1/101929222, intron 3 of 7)	11	90869121	90869202	82	2	100302228	ENST00000408659.1	120717	ENSG00000221586	MIR1261	microRNA 1261
NYC_18799	chr11	90749700	90750200	501	*	56.0692	-2.10452	0.591665	-3.55694	0.000375199	0.00765556	Intron (ENST00000649150.1/101929222, intron 3 of 7)	11	90869121	90869202	82	2	100302228	ENST00000408659.1	119002	ENSG00000221586	MIR1261	microRNA 1261
NYC_18800	chr11	90751263	90751763	501	*	45.6124	-2.29967	0.631653	-3.64073	0.00027187	0.00665886	Intron (ENST00000649150.1/101929222, intron 3 of 7)	11	90869121	90869202	82	2	100302228	ENST00000408659.1	117439	ENSG00000221586	MIR1261	microRNA 1261
NYC_18801	chr11	90752379	90752879	501	*	35.4176	-1.84592	0.550611	-3.35249	0.000800889	0.0109736	Intron (ENST00000649150.1/101929222, intron 3 of 7)	11	90869121	90869202	82	2	100302228	ENST00000408659.1	116323	ENSG00000221586	MIR1261	microRNA 1261
NYC_18803	chr11	90755554	90756054	501	*	37.9921	-2.08267	0.73282	-2.84199	0.00448325	0.0305868	Intron (ENST00000649150.1/101929222, intron 3 of 7)	11	90869121	90869202	82	2	100302228	ENST00000408659.1	113148	ENSG00000221586	MIR1261	microRNA 1261
NYC_18804	chr11	90759769	90760269	501	*	58.2875	-1.87803	0.455515	-4.12288	3.74e-05	0.00303362	Intron (ENST00000649150.1/101929222, intron 3 of 7)	11	90869121	90869202	82	2	100302228	ENST00000408659.1	108933	ENSG00000221586	MIR1261	microRNA 1261
NYC_18805	chr11	90761136	90761636	501	*	43.525	-1.75085	0.601261	-2.91196	0.00359169	0.0262979	Intron (ENST00000649150.1/101929222, intron 3 of 7)	11	90869121	90869202	82	2	100302228	ENST00000408659.1	107566	ENSG00000221586	MIR1261	microRNA 1261
NYC_18806	chr11	90765290	90765790	501	*	33.3559	-2.74585	0.691795	-3.96916	7.21e-05	0.00386756	Intron (ENST00000649150.1/101929222, intron 3 of 7)	11	90869121	90869202	82	2	100302228	ENST00000408659.1	103412	ENSG00000221586	MIR1261	microRNA 1261
NYC_18808	chr11	90769450	90769950	501	*	39.2212	-1.82623	0.589562	-3.09761	0.00195087	0.0179537	Intron (ENST00000649150.1/101929222, intron 3 of 7)	11	90869121	90869202	82	2	100302228	ENST00000408659.1	99252	ENSG00000221586	MIR1261	microRNA 1261
NYC_18809	chr11	90770008	90770508	501	*	59.5903	-1.66052	0.494778	-3.35608	0.00079055	0.0109021	Intron (ENST00000649150.1/101929222, intron 3 of 7)	11	90869121	90869202	82	2	100302228	ENST00000408659.1	98694	ENSG00000221586	MIR1261	microRNA 1261
NYC_18810	chr11	90771549	90772049	501	*	40.8873	-2.39115	0.674684	-3.5441	0.000393956	0.00780924	Intron (ENST00000649150.1/101929222, intron 3 of 7)	11	90869121	90869202	82	2	100302228	ENST00000408659.1	97153	ENSG00000221586	MIR1261	microRNA 1261
NYC_18812	chr11	90774577	90775077	501	*	69.9323	-1.77928	0.428338	-4.15392	3.27e-05	0.00289625	Intron (ENST00000649150.1/101929222, intron 3 of 7)	11	90869121	90869202	82	2	100302228	ENST00000408659.1	94125	ENSG00000221586	MIR1261	microRNA 1261
NYC_18813	chr11	90775378	90775878	501	*	50.6384	-1.94257	0.603603	-3.2183	0.00128953	0.0141312	Intron (ENST00000649150.1/101929222, intron 3 of 7)	11	90869121	90869202	82	2	100302228	ENST00000408659.1	93324	ENSG00000221586	MIR1261	microRNA 1261
NYC_18814	chr11	90776054	90776554	501	*	44.288	-2.11007	0.662922	-3.18298	0.00145766	0.0152152	Intron (ENST00000649150.1/101929222, intron 3 of 7)	11	90869121	90869202	82	2	100302228	ENST00000408659.1	92648	ENSG00000221586	MIR1261	microRNA 1261
NYC_18815	chr11	90777158	90777658	501	*	48.7871	-1.6594	0.528684	-3.13873	0.00169681	0.0165125	Intron (ENST00000649150.1/101929222, intron 3 of 7)	11	90869121	90869202	82	2	100302228	ENST00000408659.1	91544	ENSG00000221586	MIR1261	microRNA 1261
NYC_18816	chr11	90777745	90778245	501	*	43.6684	-1.7797	0.579212	-3.07263	0.00212181	0.0188776	Intron (ENST00000649150.1/101929222, intron 3 of 7)	11	90869121	90869202	82	2	100302228	ENST00000408659.1	90957	ENSG00000221586	MIR1261	microRNA 1261
NYC_18817	chr11	90778560	90779060	501	*	42.2008	-2.08423	0.646659	-3.22308	0.00126819	0.0139951	Intron (ENST00000649150.1/101929222, intron 3 of 7)	11	90869121	90869202	82	2	100302228	ENST00000408659.1	90142	ENSG00000221586	MIR1261	microRNA 1261
NYC_18818	chr11	90779732	90780232	501	*	41.1969	-2.06735	0.638625	-3.23718	0.00120716	0.0136015	Intron (ENST00000649150.1/101929222, intron 3 of 7)	11	90869121	90869202	82	2	100302228	ENST00000408659.1	88970	ENSG00000221586	MIR1261	microRNA 1261
NYC_18819	chr11	90780831	90781331	501	*	47.2832	-1.80112	0.511086	-3.5241	0.00042493	0.00805998	Intron (ENST00000649150.1/101929222, intron 3 of 7)	11	90869121	90869202	82	2	100302228	ENST00000408659.1	87871	ENSG00000221586	MIR1261	microRNA 1261
NYC_18820	chr11	90781467	90781967	501	*	34.5551	-2.27087	0.715418	-3.17419	0.00150255	0.0154445	Intron (ENST00000649150.1/101929222, intron 3 of 7)	11	90869121	90869202	82	2	100302228	ENST00000408659.1	87235	ENSG00000221586	MIR1261	microRNA 1261
NYC_18821	chr11	90783778	90784278	501	*	55.7499	-1.86154	0.487647	-3.81739	0.000134873	0.00490612	Intron (ENST00000649150.1/101929222, intron 3 of 7)	11	90869121	90869202	82	2	100302228	ENST00000408659.1	84924	ENSG00000221586	MIR1261	microRNA 1261
NYC_18822	chr11	90784638	90785138	501	*	58.9264	-1.76093	0.497573	-3.53903	0.000401599	0.00784776	Intron (ENST00000649150.1/101929222, intron 3 of 7)	11	90869121	90869202	82	2	100302228	ENST00000408659.1	84064	ENSG00000221586	MIR1261	microRNA 1261
NYC_18823	chr11	90785826	90786326	501	*	48.8675	-2.2617	0.753232	-3.00266	0.00267629	0.0218276	Intron (ENST00000649150.1/101929222, intron 3 of 7)	11	90869121	90869202	82	2	100302228	ENST00000408659.1	82876	ENSG00000221586	MIR1261	microRNA 1261
NYC_18824	chr11	90786948	90787448	501	*	42.449	-2.47579	0.569688	-4.34587	1.39e-05	0.0021205	Intron (ENST00000649150.1/101929222, intron 3 of 7)	11	90869121	90869202	82	2	100302228	ENST00000408659.1	81754	ENSG00000221586	MIR1261	microRNA 1261
NYC_18825	chr11	90789887	90790387	501	*	47.2777	-2.09578	0.631193	-3.32034	0.000899067	0.0116427	Intron (ENST00000649150.1/101929222, intron 3 of 7)	11	90869121	90869202	82	2	100302228	ENST00000408659.1	78815	ENSG00000221586	MIR1261	microRNA 1261
NYC_18826	chr11	90792542	90793042	501	*	44.7946	-1.76904	0.595053	-2.97292	0.00294984	0.0231861	Intron (ENST00000649150.1/101929222, intron 3 of 7)	11	90869121	90869202	82	2	100302228	ENST00000408659.1	76160	ENSG00000221586	MIR1261	microRNA 1261
NYC_18827	chr11	90793612	90794112	501	*	39.5291	-2.16307	0.817704	-2.6453	0.00816186	0.0470017	Intron (ENST00000649150.1/101929222, intron 3 of 7)	11	90869121	90869202	82	2	100302228	ENST00000408659.1	75090	ENSG00000221586	MIR1261	microRNA 1261
NYC_18828	chr11	90794699	90795199	501	*	43.3712	-2.04609	0.676101	-3.02632	0.00247554	0.020797	Intron (ENST00000649150.1/101929222, intron 3 of 7)	11	90869121	90869202	82	2	100302228	ENST00000408659.1	74003	ENSG00000221586	MIR1261	microRNA 1261
NYC_18829	chr11	90795644	90796144	501	*	45.0842	-1.72641	0.587953	-2.93631	0.00332147	0.025007	Intron (ENST00000649150.1/101929222, intron 3 of 7)	11	90869121	90869202	82	2	100302228	ENST00000408659.1	73058	ENSG00000221586	MIR1261	microRNA 1261
NYC_18830	chr11	90796661	90797161	501	*	38.5393	-2.85411	0.561853	-5.07982	3.78e-07	0.000491286	Intron (ENST00000649150.1/101929222, intron 3 of 7)	11	90869121	90869202	82	2	100302228	ENST00000408659.1	72041	ENSG00000221586	MIR1261	microRNA 1261
NYC_18831	chr11	90798362	90798862	501	*	50.785	-1.71125	0.563849	-3.03495	0.00240579	0.02046	Intron (ENST00000649150.1/101929222, intron 3 of 7)	11	90869121	90869202	82	2	100302228	ENST00000408659.1	70340	ENSG00000221586	MIR1261	microRNA 1261
NYC_18832	chr11	90798987	90799487	501	*	32.7356	-1.96867	0.696209	-2.8277	0.00468842	0.0314594	Intron (ENST00000649150.1/101929222, intron 3 of 7)	11	90869121	90869202	82	2	100302228	ENST00000408659.1	69715	ENSG00000221586	MIR1261	microRNA 1261
NYC_18836	chr11	90806737	90807237	501	*	60.4261	-1.95509	0.408457	-4.78652	1.7e-06	0.0010314	Intron (ENST00000649150.1/101929222, intron 4 of 7)	11	90869121	90869202	82	2	100302228	ENST00000408659.1	61965	ENSG00000221586	MIR1261	microRNA 1261
NYC_18837	chr11	90809044	90809544	501	*	55.6795	-1.78528	0.47709	-3.74202	0.000182549	0.00556879	Intron (ENST00000649150.1/101929222, intron 4 of 7)	11	90869121	90869202	82	2	100302228	ENST00000408659.1	59658	ENSG00000221586	MIR1261	microRNA 1261
NYC_18838	chr11	90810296	90810796	501	*	45.9538	-2.32617	0.773861	-3.00593	0.00264774	0.0216674	Intron (ENST00000649150.1/101929222, intron 4 of 7)	11	90869121	90869202	82	2	100302228	ENST00000408659.1	58406	ENSG00000221586	MIR1261	microRNA 1261
NYC_18839	chr11	90812223	90812723	501	*	48.9321	-1.85477	0.626446	-2.96077	0.00306866	0.0237857	Intron (ENST00000649150.1/101929222, intron 4 of 7)	11	90869121	90869202	82	2	100302228	ENST00000408659.1	56479	ENSG00000221586	MIR1261	microRNA 1261
NYC_18840	chr11	90814152	90814652	501	*	53.5841	-2.28513	0.593963	-3.84726	0.000119446	0.00466089	Intron (ENST00000649150.1/101929222, intron 4 of 7)	11	90869121	90869202	82	2	100302228	ENST00000408659.1	54550	ENSG00000221586	MIR1261	microRNA 1261
NYC_18841	chr11	90815141	90815641	501	*	52.8003	-1.96258	0.590966	-3.32097	0.000897046	0.0116337	Intron (ENST00000649150.1/101929222, intron 4 of 7)	11	90869121	90869202	82	2	100302228	ENST00000408659.1	53561	ENSG00000221586	MIR1261	microRNA 1261
NYC_18842	chr11	90816057	90816557	501	*	48.3031	-2.13098	0.650112	-3.27787	0.00104595	0.0125831	Intron (ENST00000649150.1/101929222, intron 4 of 7)	11	90869121	90869202	82	2	100302228	ENST00000408659.1	52645	ENSG00000221586	MIR1261	microRNA 1261
NYC_18845	chr11	90819348	90819848	501	*	51.6694	-1.89746	0.59788	-3.17364	0.00150541	0.0154597	Intron (ENST00000649150.1/101929222, intron 4 of 7)	11	90869121	90869202	82	2	100302228	ENST00000408659.1	49354	ENSG00000221586	MIR1261	microRNA 1261
NYC_18846	chr11	90820252	90820752	501	*	47.252	-2.02211	0.623757	-3.24182	0.00118771	0.0135013	Intron (ENST00000649150.1/101929222, intron 4 of 7)	11	90869121	90869202	82	2	100302228	ENST00000408659.1	48450	ENSG00000221586	MIR1261	microRNA 1261
NYC_18847	chr11	90821187	90821687	501	*	48.4398	-1.90584	0.685155	-2.78163	0.00540873	0.0348547	Intron (ENST00000649150.1/101929222, intron 4 of 7)	11	90869121	90869202	82	2	100302228	ENST00000408659.1	47515	ENSG00000221586	MIR1261	microRNA 1261
NYC_18848	chr11	90823462	90823962	501	*	55.1493	-1.82192	0.544237	-3.34767	0.000814954	0.011065	Intron (ENST00000649150.1/101929222, intron 4 of 7)	11	90869121	90869202	82	2	100302228	ENST00000408659.1	45240	ENSG00000221586	MIR1261	microRNA 1261
NYC_18849	chr11	90825595	90826095	501	*	45.2039	-1.67581	0.540134	-3.10258	0.00191839	0.017794	Intron (ENST00000649150.1/101929222, intron 4 of 7)	11	90869121	90869202	82	2	100302228	ENST00000408659.1	43107	ENSG00000221586	MIR1261	microRNA 1261
NYC_18850	chr11	90830017	90830517	501	*	48.0552	-2.19475	0.739335	-2.96854	0.00299218	0.0233842	Intron (ENST00000649150.1/101929222, intron 4 of 7)	11	90869121	90869202	82	2	100302228	ENST00000408659.1	38685	ENSG00000221586	MIR1261	microRNA 1261
NYC_18852	chr11	90833313	90833813	501	*	46.6062	-1.76263	0.542254	-3.25055	0.0011518	0.0132603	Intron (ENST00000649150.1/101929222, intron 4 of 7)	11	90869121	90869202	82	2	100302228	ENST00000408659.1	35389	ENSG00000221586	MIR1261	microRNA 1261
NYC_18853	chr11	90833865	90834365	501	*	47.0093	-1.63047	0.467854	-3.485	0.000492145	0.0085887	Intron (ENST00000649150.1/101929222, intron 4 of 7)	11	90869121	90869202	82	2	100302228	ENST00000408659.1	34837	ENSG00000221586	MIR1261	microRNA 1261
NYC_18854	chr11	90834481	90834981	501	*	52.1728	-2.07243	0.563347	-3.67878	0.000234348	0.00623643	Intron (ENST00000649150.1/101929222, intron 4 of 7)	11	90869121	90869202	82	2	100302228	ENST00000408659.1	34221	ENSG00000221586	MIR1261	microRNA 1261
NYC_18855	chr11	90835500	90836000	501	*	40.6649	-2.19907	0.72144	-3.04817	0.00230241	0.0198587	Intron (ENST00000649150.1/101929222, intron 4 of 7)	11	90869121	90869202	82	2	100302228	ENST00000408659.1	33202	ENSG00000221586	MIR1261	microRNA 1261
NYC_18856	chr11	90837014	90837514	501	*	23.3133	-2.37867	0.670815	-3.54594	0.000391215	0.00779322	Intron (ENST00000649150.1/101929222, intron 4 of 7)	11	90869121	90869202	82	2	100302228	ENST00000408659.1	31688	ENSG00000221586	MIR1261	microRNA 1261
NYC_18857	chr11	90837530	90838030	501	*	40.7662	-1.63956	0.621372	-2.63862	0.00832448	0.0476633	Intron (ENST00000649150.1/101929222, intron 4 of 7)	11	90869121	90869202	82	2	100302228	ENST00000408659.1	31172	ENSG00000221586	MIR1261	microRNA 1261
NYC_18860	chr11	90842862	90843362	501	*	52.4765	-1.99015	0.506101	-3.93232	8.41e-05	0.00409218	Intron (ENST00000649150.1/101929222, intron 4 of 7)	11	90869121	90869202	82	2	100302228	ENST00000408659.1	25840	ENSG00000221586	MIR1261	microRNA 1261
NYC_18861	chr11	90843412	90843912	501	*	30.543	-2.14584	0.79526	-2.69828	0.00696985	0.0418079	Intron (ENST00000649150.1/101929222, intron 4 of 7)	11	90869121	90869202	82	2	100302228	ENST00000408659.1	25290	ENSG00000221586	MIR1261	microRNA 1261
NYC_18862	chr11	90844546	90845046	501	*	52.4229	-2.04838	0.609212	-3.36234	0.00077284	0.0107378	Exon (ENST00000649150.1/101929222, exon 5 of 8)	11	90869121	90869202	82	2	100302228	ENST00000408659.1	24156	ENSG00000221586	MIR1261	microRNA 1261
NYC_18863	chr11	90845090	90845590	501	*	60.0929	-1.02844	0.345224	-2.97904	0.00289152	0.0228983	Intron (ENST00000649150.1/101929222, intron 5 of 7)	11	90869121	90869202	82	2	100302228	ENST00000408659.1	23612	ENSG00000221586	MIR1261	microRNA 1261
NYC_18864	chr11	90846567	90847067	501	*	47.2582	-1.61078	0.541626	-2.97397	0.00293977	0.0231429	Intron (ENST00000649150.1/101929222, intron 5 of 7)	11	90869121	90869202	82	2	100302228	ENST00000408659.1	22135	ENSG00000221586	MIR1261	microRNA 1261
NYC_18865	chr11	90847597	90848097	501	*	43.853	-1.65989	0.542447	-3.06	0.00221339	0.0193596	Intron (ENST00000649150.1/101929222, intron 5 of 7)	11	90869121	90869202	82	2	100302228	ENST00000408659.1	21105	ENSG00000221586	MIR1261	microRNA 1261
NYC_18866	chr11	90848262	90848762	501	*	34.3258	-2.46935	0.682615	-3.61748	0.000297481	0.00691824	Intron (ENST00000649150.1/101929222, intron 5 of 7)	11	90869121	90869202	82	2	100302228	ENST00000408659.1	20440	ENSG00000221586	MIR1261	microRNA 1261
NYC_18867	chr11	90849343	90849843	501	*	63.5574	-1.10257	0.370599	-2.9751	0.00292897	0.0230929	Exon (ENST00000649150.1/101929222, exon 6 of 8)	11	90869121	90869202	82	2	100302228	ENST00000408659.1	19359	ENSG00000221586	MIR1261	microRNA 1261
NYC_18868	chr11	90850372	90850872	501	*	44.0171	-2.17009	0.640864	-3.3862	0.000708676	0.0102703	Intron (ENST00000649150.1/101929222, intron 6 of 7)	11	90869121	90869202	82	2	100302228	ENST00000408659.1	18330	ENSG00000221586	MIR1261	microRNA 1261
NYC_18869	chr11	90850908	90851408	501	*	39.6043	-2.22793	0.602477	-3.69795	0.000217346	0.00602093	Intron (ENST00000649150.1/101929222, intron 6 of 7)	11	90869121	90869202	82	2	100302228	ENST00000408659.1	17794	ENSG00000221586	MIR1261	microRNA 1261
NYC_18870	chr11	90854192	90854692	501	*	44.6352	-1.88254	0.555979	-3.386	0.000709204	0.0102713	Intron (ENST00000649150.1/101929222, intron 7 of 7)	11	90869121	90869202	82	2	100302228	ENST00000408659.1	14510	ENSG00000221586	MIR1261	microRNA 1261
NYC_18871	chr11	90854794	90855294	501	*	44.3503	-2.21325	0.598305	-3.6992	0.00021628	0.00600484	Intron (ENST00000649150.1/101929222, intron 7 of 7)	11	90869121	90869202	82	2	100302228	ENST00000408659.1	13908	ENSG00000221586	MIR1261	microRNA 1261
NYC_18872	chr11	90856077	90856577	501	*	41.3285	-2.67584	0.790894	-3.38331	0.000716182	0.0103173	Intron (ENST00000649150.1/101929222, intron 7 of 7)	11	90869121	90869202	82	2	100302228	ENST00000408659.1	12625	ENSG00000221586	MIR1261	microRNA 1261
NYC_18873	chr11	90857196	90857696	501	*	58.1693	-2.13321	0.579219	-3.68291	0.00023059	0.00621094	Intron (ENST00000649150.1/101929222, intron 7 of 7)	11	90869121	90869202	82	2	100302228	ENST00000408659.1	11506	ENSG00000221586	MIR1261	microRNA 1261
NYC_18875	chr11	90859853	90860353	501	*	41.0399	-1.60151	0.583226	-2.74596	0.00603346	0.0376323	Intron (ENST00000649150.1/101929222, intron 7 of 7)	11	90869121	90869202	82	2	100302228	ENST00000408659.1	8849	ENSG00000221586	MIR1261	microRNA 1261
NYC_18877	chr11	90861418	90861918	501	*	44.899	-2.30532	0.740693	-3.11238	0.00185588	0.0174627	Intron (ENST00000649150.1/101929222, intron 7 of 7)	11	90869121	90869202	82	2	100302228	ENST00000408659.1	7284	ENSG00000221586	MIR1261	microRNA 1261
NYC_18878	chr11	90862391	90862891	501	*	55.7169	-1.98067	0.589497	-3.35992	0.000779647	0.0107944	Intron (ENST00000649150.1/101929222, intron 7 of 7)	11	90869121	90869202	82	2	100302228	ENST00000408659.1	6311	ENSG00000221586	MIR1261	microRNA 1261
NYC_18879	chr11	90863109	90863609	501	*	32.9946	-1.98727	0.663666	-2.99438	0.00275	0.0221893	Exon (ENST00000561596.5/101929222, exon 7 of 7)	11	90869121	90869202	82	2	100302228	ENST00000408659.1	5593	ENSG00000221586	MIR1261	microRNA 1261
NYC_18880	chr11	90863679	90864179	501	*	47.0412	-2.00884	0.615832	-3.262	0.00110629	0.0129513	Exon (ENST00000562678.5/101929222, exon 6 of 6)	11	90869121	90869202	82	2	100302228	ENST00000408659.1	5023	ENSG00000221586	MIR1261	microRNA 1261
NYC_18882	chr11	90868564	90869064	501	*	56.3511	-1.92534	0.606914	-3.17235	0.00151209	0.0154771	Promoter (<=1kb)	11	90869121	90869202	82	2	100302228	ENST00000408659.1	138	ENSG00000221586	MIR1261	microRNA 1261
NYC_18885	chr11	90873423	90873923	501	*	50.9243	-2.49416	0.539839	-4.62018	3.83e-06	0.00141622	Intron (ENST00000649150.1/101929222, intron 7 of 7)	11	90869121	90869202	82	2	100302228	ENST00000408659.1	-4221	ENSG00000221586	MIR1261	microRNA 1261
NYC_18888	chr11	90875704	90876204	501	*	54.814	-1.81817	0.663335	-2.74095	0.00612614	0.038049	Intron (ENST00000649150.1/101929222, intron 7 of 7)	11	90869121	90869202	82	2	100302228	ENST00000408659.1	-6502	ENSG00000221586	MIR1261	microRNA 1261
NYC_18889	chr11	90876815	90877315	501	*	51.8626	-2.03325	0.713063	-2.85143	0.00435236	0.0299165	Intron (ENST00000649150.1/101929222, intron 7 of 7)	11	90869121	90869202	82	2	100302228	ENST00000408659.1	-7613	ENSG00000221586	MIR1261	microRNA 1261
NYC_18890	chr11	90877971	90878471	501	*	57.6152	-1.73985	0.549745	-3.16483	0.00155172	0.0156774	Intron (ENST00000649150.1/101929222, intron 7 of 7)	11	90869121	90869202	82	2	100302228	ENST00000408659.1	-8769	ENSG00000221586	MIR1261	microRNA 1261
NYC_18892	chr11	90881638	90882138	501	*	47.6833	-1.92182	0.624296	-3.07838	0.00208128	0.0186624	Intron (ENST00000649150.1/101929222, intron 7 of 7)	11	90869121	90869202	82	2	100302228	ENST00000408659.1	-12436	ENSG00000221586	MIR1261	microRNA 1261
NYC_18894	chr11	90882951	90883451	501	*	48.1436	-1.99744	0.561512	-3.55726	0.000374743	0.00765043	Intron (ENST00000649150.1/101929222, intron 7 of 7)	11	90869121	90869202	82	2	100302228	ENST00000408659.1	-13749	ENSG00000221586	MIR1261	microRNA 1261
NYC_18895	chr11	90883898	90884398	501	*	31.4159	-1.8774	0.71126	-2.63954	0.00830179	0.0475772	Intron (ENST00000649150.1/101929222, intron 7 of 7)	11	90869121	90869202	82	2	100302228	ENST00000408659.1	-14696	ENSG00000221586	MIR1261	microRNA 1261
NYC_18896	chr11	90884480	90884980	501	*	44.4076	-2.0998	0.63277	-3.31842	0.000905271	0.0116905	Intron (ENST00000649150.1/101929222, intron 7 of 7)	11	90869121	90869202	82	2	100302228	ENST00000408659.1	-15278	ENSG00000221586	MIR1261	microRNA 1261
NYC_18897	chr11	90885392	90885892	501	*	55.762	-2.10441	0.524012	-4.01596	5.92e-05	0.00357293	Intron (ENST00000649150.1/101929222, intron 7 of 7)	11	90869121	90869202	82	2	100302228	ENST00000408659.1	-16190	ENSG00000221586	MIR1261	microRNA 1261
NYC_18899	chr11	90886904	90887404	501	*	38.7343	-2.4343	0.744017	-3.27184	0.00106852	0.0126902	Intron (ENST00000649150.1/101929222, intron 7 of 7)	11	90869121	90869202	82	2	100302228	ENST00000408659.1	-17702	ENSG00000221586	MIR1261	microRNA 1261
NYC_18900	chr11	90888322	90888822	501	*	52.186	-1.71958	0.639518	-2.68888	0.00716932	0.0427248	Intron (ENST00000649150.1/101929222, intron 7 of 7)	11	90869121	90869202	82	2	100302228	ENST00000408659.1	-19120	ENSG00000221586	MIR1261	microRNA 1261
NYC_18901	chr11	90889394	90889894	501	*	46.2507	-2.05906	0.627805	-3.27978	0.00103888	0.0125521	Intron (ENST00000649150.1/101929222, intron 7 of 7)	11	90869121	90869202	82	2	100302228	ENST00000408659.1	-20192	ENSG00000221586	MIR1261	microRNA 1261
NYC_18902	chr11	90890718	90891218	501	*	55.0995	-1.98703	0.604794	-3.28547	0.00101811	0.0124213	Intron (ENST00000649150.1/101929222, intron 7 of 7)	11	90869121	90869202	82	2	100302228	ENST00000408659.1	-21516	ENSG00000221586	MIR1261	microRNA 1261
NYC_18903	chr11	90892068	90892568	501	*	57.1955	-1.60635	0.56809	-2.82763	0.00468935	0.0314594	Intron (ENST00000649150.1/101929222, intron 7 of 7)	11	90869121	90869202	82	2	100302228	ENST00000408659.1	-22866	ENSG00000221586	MIR1261	microRNA 1261
NYC_18906	chr11	90893995	90894495	501	*	59.5226	-1.67481	0.545745	-3.06886	0.00214876	0.0190234	Intron (ENST00000649150.1/101929222, intron 7 of 7)	11	90869121	90869202	82	2	100302228	ENST00000408659.1	-24793	ENSG00000221586	MIR1261	microRNA 1261
NYC_18909	chr11	90895732	90896232	501	*	27.9565	-2.07676	0.702652	-2.9556	0.00312062	0.0240253	Intron (ENST00000649150.1/101929222, intron 7 of 7)	11	90869121	90869202	82	2	100302228	ENST00000408659.1	-26530	ENSG00000221586	MIR1261	microRNA 1261
NYC_18911	chr11	90896855	90897355	501	*	44.1833	-2.04763	0.651396	-3.14345	0.00166969	0.0163369	Intron (ENST00000649150.1/101929222, intron 7 of 7)	11	90869121	90869202	82	2	100302228	ENST00000408659.1	-27653	ENSG00000221586	MIR1261	microRNA 1261
NYC_18912	chr11	90899522	90900022	501	*	46.2395	-2.42644	0.723394	-3.35425	0.000795811	0.0109308	Intron (ENST00000649150.1/101929222, intron 7 of 7)	11	90869121	90869202	82	2	100302228	ENST00000408659.1	-30320	ENSG00000221586	MIR1261	microRNA 1261
NYC_18913	chr11	90900427	90900927	501	*	61.5317	-2.18766	0.79857	-2.73947	0.0061538	0.0381657	Intron (ENST00000649150.1/101929222, intron 7 of 7)	11	90869121	90869202	82	2	100302228	ENST00000408659.1	-31225	ENSG00000221586	MIR1261	microRNA 1261
NYC_18914	chr11	90901634	90902134	501	*	49.3047	-2.02429	0.648449	-3.12174	0.00179784	0.0171494	Intron (ENST00000649150.1/101929222, intron 7 of 7)	11	90869121	90869202	82	2	100302228	ENST00000408659.1	-32432	ENSG00000221586	MIR1261	microRNA 1261
NYC_18915	chr11	90904279	90904779	501	*	33.2059	-2.33087	0.615267	-3.78838	0.000151631	0.00516053	Intron (ENST00000649150.1/101929222, intron 7 of 7)	11	90869121	90869202	82	2	100302228	ENST00000408659.1	-35077	ENSG00000221586	MIR1261	microRNA 1261
NYC_18916	chr11	90904788	90905288	501	*	35.0676	-2.34711	0.703448	-3.33658	0.000848164	0.0113136	Intron (ENST00000649150.1/101929222, intron 7 of 7)	11	90869121	90869202	82	2	100302228	ENST00000408659.1	-35586	ENSG00000221586	MIR1261	microRNA 1261
NYC_18918	chr11	90906071	90906571	501	*	32.5492	-2.05043	0.653174	-3.13918	0.00169418	0.0164984	Intron (ENST00000649150.1/101929222, intron 7 of 7)	11	90869121	90869202	82	2	100302228	ENST00000408659.1	-36869	ENSG00000221586	MIR1261	microRNA 1261
NYC_18921	chr11	90909287	90909787	501	*	55.4721	-1.67459	0.500042	-3.34889	0.000811347	0.0110331	Intron (ENST00000649150.1/101929222, intron 7 of 7)	11	90869121	90869202	82	2	100302228	ENST00000408659.1	-40085	ENSG00000221586	MIR1261	microRNA 1261
NYC_18922	chr11	90909966	90910466	501	*	53.6549	-1.98393	0.539847	-3.67498	0.000237866	0.00627224	Intron (ENST00000649150.1/101929222, intron 7 of 7)	11	90869121	90869202	82	2	100302228	ENST00000408659.1	-40764	ENSG00000221586	MIR1261	microRNA 1261
NYC_18923	chr11	90911089	90911589	501	*	40.3045	-1.98519	0.529501	-3.74916	0.000177427	0.00550131	Intron (ENST00000649150.1/101929222, intron 7 of 7)	11	90869121	90869202	82	2	100302228	ENST00000408659.1	-41887	ENSG00000221586	MIR1261	microRNA 1261
NYC_18924	chr11	90911665	90912165	501	*	36.3782	-1.74733	0.656881	-2.66004	0.00781314	0.0455233	Intron (ENST00000649150.1/101929222, intron 7 of 7)	11	90869121	90869202	82	2	100302228	ENST00000408659.1	-42463	ENSG00000221586	MIR1261	microRNA 1261
NYC_18925	chr11	90912496	90912996	501	*	45.6304	-2.22763	0.686409	-3.24534	0.00117311	0.0134008	Intron (ENST00000649150.1/101929222, intron 7 of 7)	11	90869121	90869202	82	2	100302228	ENST00000408659.1	-43294	ENSG00000221586	MIR1261	microRNA 1261
NYC_18926	chr11	90914042	90914542	501	*	69.4922	-1.43788	0.444888	-3.23201	0.00122922	0.0137413	Intron (ENST00000649150.1/101929222, intron 7 of 7)	11	90869121	90869202	82	2	100302228	ENST00000408659.1	-44840	ENSG00000221586	MIR1261	microRNA 1261
NYC_18929	chr11	90916655	90917155	501	*	72.2827	-1.0209	0.338177	-3.01885	0.0025374	0.0211262	Distal Intergenic	11	90869121	90869202	82	2	100302228	ENST00000408659.1	-47453	ENSG00000221586	MIR1261	microRNA 1261
NYC_18930	chr11	90917479	90917979	501	*	38.2752	-2.12634	0.688414	-3.08876	0.00200995	0.0183036	Distal Intergenic	11	90869121	90869202	82	2	100302228	ENST00000408659.1	-48277	ENSG00000221586	MIR1261	microRNA 1261
NYC_18932	chr11	90919900	90920400	501	*	42.0408	-1.94067	0.686394	-2.82734	0.00469362	0.0314762	Distal Intergenic	11	90869121	90869202	82	2	100302228	ENST00000408659.1	-50698	ENSG00000221586	MIR1261	microRNA 1261
NYC_18933	chr11	90920656	90921156	501	*	57.367	-1.82512	0.549559	-3.32106	0.000896761	0.0116337	Distal Intergenic	11	90869121	90869202	82	2	100302228	ENST00000408659.1	-51454	ENSG00000221586	MIR1261	microRNA 1261
NYC_18935	chr11	90922484	90922984	501	*	38.4722	-2.02103	0.527781	-3.8293	0.000128511	0.00481847	Distal Intergenic	11	90869121	90869202	82	2	100302228	ENST00000408659.1	-53282	ENSG00000221586	MIR1261	microRNA 1261
NYC_18936	chr11	90923172	90923672	501	*	59.8852	-1.63166	0.483155	-3.37709	0.000732565	0.0104417	Distal Intergenic	11	90869121	90869202	82	2	100302228	ENST00000408659.1	-53970	ENSG00000221586	MIR1261	microRNA 1261
NYC_18937	chr11	90924291	90924791	501	*	65.2703	-2.03698	0.768872	-2.6493	0.0080658	0.0466117	Distal Intergenic	11	90869121	90869202	82	2	100302228	ENST00000408659.1	-55089	ENSG00000221586	MIR1261	microRNA 1261
NYC_18938	chr11	90926182	90926682	501	*	36.3763	-1.9445	0.63	-3.08651	0.00202518	0.0183894	Distal Intergenic	11	90869121	90869202	82	2	100302228	ENST00000408659.1	-56980	ENSG00000221586	MIR1261	microRNA 1261
NYC_18939	chr11	90926720	90927220	501	*	42.7585	-2.14581	0.663919	-3.23204	0.0012291	0.0137413	Distal Intergenic	11	90869121	90869202	82	2	100302228	ENST00000408659.1	-57518	ENSG00000221586	MIR1261	microRNA 1261
NYC_18940	chr11	90927857	90928357	501	*	47.7882	-1.8218	0.562283	-3.24001	0.00119526	0.0135404	Distal Intergenic	11	90869121	90869202	82	2	100302228	ENST00000408659.1	-58655	ENSG00000221586	MIR1261	microRNA 1261
NYC_18941	chr11	90928366	90928866	501	*	66.626	-1.82791	0.408984	-4.46939	7.84e-06	0.00180829	Distal Intergenic	11	90869121	90869202	82	2	100302228	ENST00000408659.1	-59164	ENSG00000221586	MIR1261	microRNA 1261
NYC_18943	chr11	90931194	90931694	501	*	68.3936	-1.54392	0.382103	-4.04059	5.33e-05	0.00340536	Distal Intergenic	11	90869121	90869202	82	2	100302228	ENST00000408659.1	-61992	ENSG00000221586	MIR1261	microRNA 1261
NYC_18944	chr11	90931991	90932491	501	*	48.1273	-1.87066	0.632083	-2.95952	0.00308121	0.0238401	Distal Intergenic	11	90869121	90869202	82	2	100302228	ENST00000408659.1	-62789	ENSG00000221586	MIR1261	microRNA 1261
NYC_18946	chr11	90935006	90935506	501	*	33.8225	-2.08197	0.612583	-3.39868	0.000677118	0.0100431	Distal Intergenic	11	90869121	90869202	82	2	100302228	ENST00000408659.1	-65804	ENSG00000221586	MIR1261	microRNA 1261
NYC_18947	chr11	90935521	90936021	501	*	44.244	-1.81559	0.529056	-3.43176	0.000599671	0.00945891	Distal Intergenic	11	90869121	90869202	82	2	100302228	ENST00000408659.1	-66319	ENSG00000221586	MIR1261	microRNA 1261
NYC_18948	chr11	90936684	90937184	501	*	75.215	-1.51041	0.39524	-3.8215	0.000132643	0.00485405	Distal Intergenic	11	90869121	90869202	82	2	100302228	ENST00000408659.1	-67482	ENSG00000221586	MIR1261	microRNA 1261
NYC_18950	chr11	90938667	90939167	501	*	36.1841	-1.71469	0.63431	-2.70323	0.00686693	0.0413104	Distal Intergenic	11	90869121	90869202	82	2	100302228	ENST00000408659.1	-69465	ENSG00000221586	MIR1261	microRNA 1261
NYC_18951	chr11	90939261	90939761	501	*	50.7221	-1.53093	0.566194	-2.7039	0.00685301	0.0412776	Distal Intergenic	11	90869121	90869202	82	2	100302228	ENST00000408659.1	-70059	ENSG00000221586	MIR1261	microRNA 1261
NYC_18953	chr11	90942530	90943030	501	*	38.914	-2.46245	0.776861	-3.16974	0.00152574	0.0155541	Distal Intergenic	11	90869121	90869202	82	2	100302228	ENST00000408659.1	-73328	ENSG00000221586	MIR1261	microRNA 1261
NYC_18955	chr11	90945228	90945728	501	*	39.9948	-1.8177	0.540718	-3.36163	0.000774833	0.0107563	Distal Intergenic	11	90869121	90869202	82	2	100302228	ENST00000408659.1	-76026	ENSG00000221586	MIR1261	microRNA 1261
NYC_18956	chr11	90945931	90946431	501	*	29.8477	-1.92899	0.728715	-2.64712	0.00811813	0.0467933	Distal Intergenic	11	90869121	90869202	82	2	100302228	ENST00000408659.1	-76729	ENSG00000221586	MIR1261	microRNA 1261
NYC_18958	chr11	90947362	90947862	501	*	62.7512	-2.02812	0.424179	-4.78128	1.74e-06	0.00103427	Distal Intergenic	11	90869121	90869202	82	2	100302228	ENST00000408659.1	-78160	ENSG00000221586	MIR1261	microRNA 1261
NYC_18959	chr11	90948345	90948845	501	*	40.4646	-2.23534	0.6339	-3.52633	0.000421369	0.00804475	Distal Intergenic	11	90869121	90869202	82	2	100302228	ENST00000408659.1	-79143	ENSG00000221586	MIR1261	microRNA 1261
NYC_18960	chr11	90950271	90950771	501	*	35.4973	-2.10868	0.664705	-3.17236	0.00151206	0.0154771	Distal Intergenic	11	90869121	90869202	82	2	100302228	ENST00000408659.1	-81069	ENSG00000221586	MIR1261	microRNA 1261
NYC_18961	chr11	90950833	90951333	501	*	50.1015	-1.68386	0.601801	-2.79803	0.00514156	0.0336101	Distal Intergenic	11	90869121	90869202	82	2	100302228	ENST00000408659.1	-81631	ENSG00000221586	MIR1261	microRNA 1261
NYC_18962	chr11	90952298	90952798	501	*	45.1328	-1.97859	0.601985	-3.28678	0.00101341	0.0123944	Distal Intergenic	11	90869121	90869202	82	2	100302228	ENST00000408659.1	-83096	ENSG00000221586	MIR1261	microRNA 1261
NYC_18963	chr11	90953540	90954040	501	*	55.4433	-1.76954	0.505362	-3.50153	0.000462599	0.00836854	Distal Intergenic	11	90869121	90869202	82	2	100302228	ENST00000408659.1	-84338	ENSG00000221586	MIR1261	microRNA 1261
NYC_18964	chr11	90954509	90955009	501	*	55.0227	-1.78687	0.567174	-3.15048	0.00163003	0.016115	Distal Intergenic	11	90869121	90869202	82	2	100302228	ENST00000408659.1	-85307	ENSG00000221586	MIR1261	microRNA 1261
NYC_18965	chr11	90956071	90956571	501	*	31.7045	-2.29914	0.741912	-3.09894	0.00194217	0.0179267	Distal Intergenic	11	90869121	90869202	82	2	100302228	ENST00000408659.1	-86869	ENSG00000221586	MIR1261	microRNA 1261
NYC_18966	chr11	90956631	90957131	501	*	47.1058	-2.24509	0.683493	-3.28474	0.00102078	0.0124436	Distal Intergenic	11	90869121	90869202	82	2	100302228	ENST00000408659.1	-87429	ENSG00000221586	MIR1261	microRNA 1261
NYC_18967	chr11	90957857	90958357	501	*	51.4586	-1.86253	0.529311	-3.51879	0.000433528	0.00814458	Distal Intergenic	11	90869121	90869202	82	2	100302228	ENST00000408659.1	-88655	ENSG00000221586	MIR1261	microRNA 1261
NYC_18968	chr11	90958499	90958999	501	*	37.8274	-1.99937	0.517303	-3.86499	0.000111095	0.004551	Distal Intergenic	11	90869121	90869202	82	2	100302228	ENST00000408659.1	-89297	ENSG00000221586	MIR1261	microRNA 1261
NYC_18969	chr11	90959350	90959850	501	*	50.4171	-1.92655	0.602869	-3.19563	0.00139525	0.0148004	Distal Intergenic	11	90869121	90869202	82	2	100302228	ENST00000408659.1	-90148	ENSG00000221586	MIR1261	microRNA 1261
NYC_18970	chr11	90960084	90960584	501	*	54.0622	-1.78147	0.469458	-3.79474	0.000147801	0.0051028	Distal Intergenic	11	90869121	90869202	82	2	100302228	ENST00000408659.1	-90882	ENSG00000221586	MIR1261	microRNA 1261
NYC_18971	chr11	90961070	90961570	501	*	47.3322	-1.73808	0.59473	-2.92247	0.00347272	0.0257675	Distal Intergenic	11	90869121	90869202	82	2	100302228	ENST00000408659.1	-91868	ENSG00000221586	MIR1261	microRNA 1261
NYC_18972	chr11	90962008	90962508	501	*	48.6991	-1.98554	0.667955	-2.97257	0.0029532	0.023201	Distal Intergenic	11	90869121	90869202	82	2	100302228	ENST00000408659.1	-92806	ENSG00000221586	MIR1261	microRNA 1261
NYC_18973	chr11	90964018	90964518	501	*	53.9549	-1.99072	0.540486	-3.68319	0.000230329	0.00620696	Distal Intergenic	11	90869121	90869202	82	2	100302228	ENST00000408659.1	-94816	ENSG00000221586	MIR1261	microRNA 1261
NYC_18974	chr11	90964714	90965214	501	*	40.6914	-2.64981	0.625767	-4.2345	2.29e-05	0.0025464	Distal Intergenic	11	90869121	90869202	82	2	100302228	ENST00000408659.1	-95512	ENSG00000221586	MIR1261	microRNA 1261
NYC_18975	chr11	90972441	90972941	501	*	58.365	-2.08239	0.480003	-4.33829	1.44e-05	0.00213287	Exon (ENST00000623482.1/ENST00000623482.1, exon 1 of 1)	11	90869121	90869202	82	2	100302228	ENST00000408659.1	-103239	ENSG00000221586	MIR1261	microRNA 1261
NYC_18976	chr11	90974379	90974879	501	*	43.1142	-2.3483	0.635112	-3.69746	0.000217764	0.00602509	Distal Intergenic	11	90869121	90869202	82	2	100302228	ENST00000408659.1	-105177	ENSG00000221586	MIR1261	microRNA 1261
NYC_18977	chr11	90979050	90979550	501	*	65.8309	-1.43416	0.358333	-4.0023	6.27e-05	0.00367293	Distal Intergenic	11	90869121	90869202	82	2	100302228	ENST00000408659.1	-109848	ENSG00000221586	MIR1261	microRNA 1261
NYC_18979	chr11	90981076	90981576	501	*	51.2656	-2.19955	0.510303	-4.31029	1.63e-05	0.00225972	Distal Intergenic	11	90869121	90869202	82	2	100302228	ENST00000408659.1	-111874	ENSG00000221586	MIR1261	microRNA 1261
NYC_18980	chr11	90982150	90982650	501	*	54.2428	-2.13732	0.674085	-3.1707	0.00152071	0.0155324	Distal Intergenic	11	90869121	90869202	82	2	100302228	ENST00000408659.1	-112948	ENSG00000221586	MIR1261	microRNA 1261
NYC_18981	chr11	90983130	90983630	501	*	67.1557	-2.17619	0.703965	-3.09133	0.00199262	0.0181942	Distal Intergenic	11	90869121	90869202	82	2	100302228	ENST00000408659.1	-113928	ENSG00000221586	MIR1261	microRNA 1261
NYC_18982	chr11	90984166	90984666	501	*	49.0738	-1.66465	0.582873	-2.85595	0.00429088	0.0296622	Distal Intergenic	11	90869121	90869202	82	2	100302228	ENST00000408659.1	-114964	ENSG00000221586	MIR1261	microRNA 1261
NYC_18983	chr11	90984995	90985495	501	*	47.9871	-1.91324	0.605067	-3.16202	0.00156677	0.015757	Distal Intergenic	11	90869121	90869202	82	2	100302228	ENST00000408659.1	-115793	ENSG00000221586	MIR1261	microRNA 1261
NYC_18985	chr11	90986738	90987238	501	*	29.95	-2.38706	0.791711	-3.01507	0.00256924	0.0212872	Distal Intergenic	11	90869121	90869202	82	2	100302228	ENST00000408659.1	-117536	ENSG00000221586	MIR1261	microRNA 1261
NYC_18986	chr11	90987260	90987760	501	*	41.6898	-2.06995	0.601694	-3.4402	0.000581275	0.00932659	Distal Intergenic	11	90869121	90869202	82	2	100302228	ENST00000408659.1	-118058	ENSG00000221586	MIR1261	microRNA 1261
NYC_18987	chr11	90989518	90990018	501	*	63.7394	-2.09598	0.77519	-2.70382	0.00685466	0.0412808	Distal Intergenic	11	90869121	90869202	82	2	100302228	ENST00000408659.1	-120316	ENSG00000221586	MIR1261	microRNA 1261
NYC_18990	chr11	90992309	90992809	501	*	53.9021	-1.65968	0.567158	-2.9263	0.00343015	0.0255466	Distal Intergenic	11	90869121	90869202	82	2	100302228	ENST00000408659.1	-123107	ENSG00000221586	MIR1261	microRNA 1261
NYC_18992	chr11	90997165	90997665	501	*	36.2427	-1.99164	0.746698	-2.66727	0.0076471	0.0448306	Distal Intergenic	11	90869121	90869202	82	2	100302228	ENST00000408659.1	-127963	ENSG00000221586	MIR1261	microRNA 1261
NYC_18993	chr11	90997924	90998424	501	*	47.2831	-2.63893	0.764171	-3.45332	0.00055373	0.00910675	Distal Intergenic	11	90869121	90869202	82	2	100302228	ENST00000408659.1	-128722	ENSG00000221586	MIR1261	microRNA 1261
NYC_18994	chr11	90999739	91000239	501	*	56.3011	-1.90595	0.575426	-3.31225	0.000925482	0.0118151	Distal Intergenic	11	90869121	90869202	82	2	100302228	ENST00000408659.1	-130537	ENSG00000221586	MIR1261	microRNA 1261
NYC_18995	chr11	91000630	91001130	501	*	55.1639	-1.93785	0.530953	-3.64976	0.000262486	0.00655335	Distal Intergenic	11	90869121	90869202	82	2	100302228	ENST00000408659.1	-131428	ENSG00000221586	MIR1261	microRNA 1261
NYC_18996	chr11	91002239	91002739	501	*	41.3453	-2.09188	0.630652	-3.317	0.000909891	0.0117123	Distal Intergenic	11	90869121	90869202	82	2	100302228	ENST00000408659.1	-133037	ENSG00000221586	MIR1261	microRNA 1261
NYC_18997	chr11	91002799	91003299	501	*	33.5284	-1.8778	0.697193	-2.69337	0.00707345	0.0422971	Distal Intergenic	11	90869121	90869202	82	2	100302228	ENST00000408659.1	-133597	ENSG00000221586	MIR1261	microRNA 1261
NYC_18998	chr11	91003308	91003808	501	*	29.4717	-2.10773	0.780574	-2.70023	0.00692909	0.0416125	Distal Intergenic	11	90869121	90869202	82	2	100302228	ENST00000408659.1	-134106	ENSG00000221586	MIR1261	microRNA 1261
NYC_18999	chr11	91004828	91005328	501	*	56.1963	-1.5833	0.516157	-3.06748	0.00215869	0.0190661	Distal Intergenic	11	90869121	90869202	82	2	100302228	ENST00000408659.1	-135626	ENSG00000221586	MIR1261	microRNA 1261
NYC_19001	chr11	91007978	91008478	501	*	46.317	-2.61657	0.706271	-3.70477	0.000211583	0.00593931	Distal Intergenic	11	90869121	90869202	82	2	100302228	ENST00000408659.1	-138776	ENSG00000221586	MIR1261	microRNA 1261
NYC_19002	chr11	91009561	91010061	501	*	55.1741	-1.66538	0.457625	-3.63917	0.000273515	0.00666993	Distal Intergenic	11	90869121	90869202	82	2	100302228	ENST00000408659.1	-140359	ENSG00000221586	MIR1261	microRNA 1261
NYC_19003	chr11	91011608	91012108	501	*	43.737	-2.48717	0.581956	-4.27382	1.92e-05	0.00238769	Distal Intergenic	11	90869121	90869202	82	2	100302228	ENST00000408659.1	-142406	ENSG00000221586	MIR1261	microRNA 1261
NYC_19004	chr11	91013905	91014405	501	*	45.5258	-1.89145	0.526162	-3.5948	0.000324637	0.00719776	Exon (ENST00000625148.1/ENST00000625148.1, exon 1 of 1)	11	91157994	91194078	36085	1	105369427	ENST00000666286.1	-143589	NA	LINC02748	long intergenic non-protein coding RNA 2748
NYC_19005	chr11	91015023	91015523	501	*	37.8926	-1.81074	0.549251	-3.29674	0.000978154	0.0121587	Exon (ENST00000625148.1/ENST00000625148.1, exon 1 of 1)	11	91157994	91194078	36085	1	105369427	ENST00000666286.1	-142471	NA	LINC02748	long intergenic non-protein coding RNA 2748
NYC_19006	chr11	91015541	91016041	501	*	47.5763	-1.51058	0.574913	-2.62749	0.00860161	0.0489164	Distal Intergenic	11	91157994	91194078	36085	1	105369427	ENST00000666286.1	-141953	NA	LINC02748	long intergenic non-protein coding RNA 2748
NYC_19007	chr11	91017110	91017610	501	*	47.0651	-2.29723	0.645259	-3.56017	0.000370615	0.00762181	Distal Intergenic	11	91157994	91194078	36085	1	105369427	ENST00000666286.1	-140384	NA	LINC02748	long intergenic non-protein coding RNA 2748
NYC_19008	chr11	91017769	91018269	501	*	41.4211	-2.05369	0.54796	-3.74788	0.000178336	0.0055145	Distal Intergenic	11	91157994	91194078	36085	1	105369427	ENST00000666286.1	-139725	NA	LINC02748	long intergenic non-protein coding RNA 2748
NYC_19009	chr11	91018481	91018981	501	*	50.2689	-2.19978	0.606925	-3.62446	0.000289561	0.00682892	Distal Intergenic	11	91157994	91194078	36085	1	105369427	ENST00000666286.1	-139013	NA	LINC02748	long intergenic non-protein coding RNA 2748
NYC_19010	chr11	91020430	91020930	501	*	47.6869	-2.4486	0.623921	-3.92453	8.69e-05	0.0041249	Distal Intergenic	11	91157994	91194078	36085	1	105369427	ENST00000666286.1	-137064	NA	LINC02748	long intergenic non-protein coding RNA 2748
NYC_19011	chr11	91021448	91021948	501	*	47.356	-2.13516	0.591659	-3.60877	0.000307652	0.00701615	Distal Intergenic	11	91157994	91194078	36085	1	105369427	ENST00000666286.1	-136046	NA	LINC02748	long intergenic non-protein coding RNA 2748
NYC_19012	chr11	91024196	91024696	501	*	49.8221	-1.86978	0.603135	-3.10011	0.0019345	0.0178795	Distal Intergenic	11	91157994	91194078	36085	1	105369427	ENST00000666286.1	-133298	NA	LINC02748	long intergenic non-protein coding RNA 2748
NYC_19014	chr11	91025731	91026231	501	*	58.1749	-1.59478	0.49596	-3.21554	0.00130199	0.0141827	Distal Intergenic	11	91157994	91194078	36085	1	105369427	ENST00000666286.1	-131763	NA	LINC02748	long intergenic non-protein coding RNA 2748
NYC_19015	chr11	91026547	91027047	501	*	42.8039	-2.12313	0.588689	-3.60654	0.000310304	0.00704191	Distal Intergenic	11	91157994	91194078	36085	1	105369427	ENST00000666286.1	-130947	NA	LINC02748	long intergenic non-protein coding RNA 2748
NYC_19016	chr11	91028276	91028776	501	*	51.4388	-1.89293	0.536874	-3.52583	0.000422155	0.00804555	Distal Intergenic	11	91157994	91194078	36085	1	105369427	ENST00000666286.1	-129218	NA	LINC02748	long intergenic non-protein coding RNA 2748
NYC_19017	chr11	91029690	91030190	501	*	42.2279	-2.07308	0.718927	-2.88358	0.00393186	0.0279888	Distal Intergenic	11	91157994	91194078	36085	1	105369427	ENST00000666286.1	-127804	NA	LINC02748	long intergenic non-protein coding RNA 2748
NYC_19018	chr11	91030234	91030734	501	*	44.1449	-1.73209	0.621636	-2.78634	0.00533065	0.0344953	Distal Intergenic	11	91157994	91194078	36085	1	105369427	ENST00000666286.1	-127260	NA	LINC02748	long intergenic non-protein coding RNA 2748
NYC_19019	chr11	91031086	91031586	501	*	44.3663	-2.28987	0.649408	-3.52609	0.000421748	0.00804475	Distal Intergenic	11	91157994	91194078	36085	1	105369427	ENST00000666286.1	-126408	NA	LINC02748	long intergenic non-protein coding RNA 2748
NYC_19020	chr11	91031835	91032335	501	*	48.2594	-1.6732	0.556739	-3.00536	0.00265265	0.0216932	Distal Intergenic	11	91157994	91194078	36085	1	105369427	ENST00000666286.1	-125659	NA	LINC02748	long intergenic non-protein coding RNA 2748
NYC_19021	chr11	91032605	91033105	501	*	37.3045	-2.10905	0.665153	-3.17077	0.00152034	0.0155324	Distal Intergenic	11	91157994	91194078	36085	1	105369427	ENST00000666286.1	-124889	NA	LINC02748	long intergenic non-protein coding RNA 2748
NYC_19023	chr11	91033795	91034295	501	*	30.6721	-2.37435	0.753779	-3.14994	0.00163306	0.0161257	Distal Intergenic	11	91157994	91194078	36085	1	105369427	ENST00000666286.1	-123699	NA	LINC02748	long intergenic non-protein coding RNA 2748
NYC_19024	chr11	91035467	91035967	501	*	46.9418	-2.27241	0.567387	-4.00504	6.2e-05	0.00364204	Distal Intergenic	11	91157994	91194078	36085	1	105369427	ENST00000666286.1	-122027	NA	LINC02748	long intergenic non-protein coding RNA 2748
NYC_19026	chr11	91037407	91037907	501	*	71.2712	-2.16368	0.759651	-2.84826	0.00439591	0.0301565	Distal Intergenic	11	91157994	91194078	36085	1	105369427	ENST00000666286.1	-120087	NA	LINC02748	long intergenic non-protein coding RNA 2748
NYC_19027	chr11	91038405	91038905	501	*	48.9613	-1.76674	0.583526	-3.0277	0.00246419	0.0207303	Distal Intergenic	11	91157994	91194078	36085	1	105369427	ENST00000666286.1	-119089	NA	LINC02748	long intergenic non-protein coding RNA 2748
NYC_19029	chr11	91039878	91040378	501	*	41.4196	-2.30155	0.587302	-3.91885	8.9e-05	0.00414302	Distal Intergenic	11	91157994	91194078	36085	1	105369427	ENST00000666286.1	-117616	NA	LINC02748	long intergenic non-protein coding RNA 2748
NYC_19030	chr11	91040422	91040922	501	*	41.6725	-2.03075	0.655409	-3.09844	0.00194542	0.0179383	Distal Intergenic	11	91157994	91194078	36085	1	105369427	ENST00000666286.1	-117072	NA	LINC02748	long intergenic non-protein coding RNA 2748
NYC_19031	chr11	91041331	91041831	501	*	61.2234	-1.30143	0.310773	-4.18772	2.82e-05	0.00275889	Distal Intergenic	11	91157994	91194078	36085	1	105369427	ENST00000666286.1	-116163	NA	LINC02748	long intergenic non-protein coding RNA 2748
NYC_19032	chr11	91042135	91042635	501	*	52.3012	-1.97765	0.467215	-4.23285	2.31e-05	0.00255013	Distal Intergenic	11	91157994	91194078	36085	1	105369427	ENST00000666286.1	-115359	NA	LINC02748	long intergenic non-protein coding RNA 2748
NYC_19033	chr11	91042955	91043455	501	*	50.1099	-1.51774	0.525887	-2.88606	0.00390096	0.0278511	Distal Intergenic	11	91157994	91194078	36085	1	105369427	ENST00000666286.1	-114539	NA	LINC02748	long intergenic non-protein coding RNA 2748
NYC_19034	chr11	91043468	91043968	501	*	40.5945	-2.05802	0.674409	-3.05159	0.00227632	0.0197127	Distal Intergenic	11	91157994	91194078	36085	1	105369427	ENST00000666286.1	-114026	NA	LINC02748	long intergenic non-protein coding RNA 2748
NYC_19035	chr11	91044444	91044944	501	*	40.3101	-2.29131	0.587812	-3.89803	9.7e-05	0.00428657	Distal Intergenic	11	91157994	91194078	36085	1	105369427	ENST00000666286.1	-113050	NA	LINC02748	long intergenic non-protein coding RNA 2748
NYC_19036	chr11	91047022	91047522	501	*	53.8176	-1.78719	0.54545	-3.27654	0.00105086	0.0126122	Distal Intergenic	11	91157994	91194078	36085	1	105369427	ENST00000666286.1	-110472	NA	LINC02748	long intergenic non-protein coding RNA 2748
NYC_19037	chr11	91047882	91048382	501	*	46.3199	-1.69686	0.458546	-3.70052	0.000215156	0.00599505	Distal Intergenic	11	91157994	91194078	36085	1	105369427	ENST00000666286.1	-109612	NA	LINC02748	long intergenic non-protein coding RNA 2748
NYC_19038	chr11	91048510	91049010	501	*	56.0862	-2.03501	0.635938	-3.20002	0.00137419	0.0146586	Distal Intergenic	11	91157994	91194078	36085	1	105369427	ENST00000666286.1	-108984	NA	LINC02748	long intergenic non-protein coding RNA 2748
NYC_19039	chr11	91050235	91050735	501	*	51.5871	-1.99759	0.690253	-2.894	0.00380373	0.0273701	Distal Intergenic	11	91157994	91194078	36085	1	105369427	ENST00000666286.1	-107259	NA	LINC02748	long intergenic non-protein coding RNA 2748
NYC_19040	chr11	91052532	91053032	501	*	55.494	-2.33333	0.637485	-3.66022	0.000251999	0.00645785	Distal Intergenic	11	91157994	91194078	36085	1	105369427	ENST00000666286.1	-104962	NA	LINC02748	long intergenic non-protein coding RNA 2748
NYC_19041	chr11	91056977	91057477	501	*	48.3397	-1.91352	0.681179	-2.80913	0.00496749	0.0327903	Distal Intergenic	11	91157994	91194078	36085	1	105369427	ENST00000666286.1	-100517	NA	LINC02748	long intergenic non-protein coding RNA 2748
NYC_19042	chr11	91057714	91058214	501	*	42.6445	-1.87819	0.565784	-3.31962	0.000901395	0.0116672	Distal Intergenic	11	91157994	91194078	36085	1	105369427	ENST00000666286.1	-99780	NA	LINC02748	long intergenic non-protein coding RNA 2748
NYC_19044	chr11	91060652	91061152	501	*	69.8026	-2.0954	0.729939	-2.87064	0.00409638	0.0287508	Distal Intergenic	11	91157994	91194078	36085	1	105369427	ENST00000666286.1	-96842	NA	LINC02748	long intergenic non-protein coding RNA 2748
NYC_19045	chr11	91061622	91062122	501	*	58.0327	-1.99019	0.559279	-3.55849	0.000372987	0.00764266	Distal Intergenic	11	91157994	91194078	36085	1	105369427	ENST00000666286.1	-95872	NA	LINC02748	long intergenic non-protein coding RNA 2748
NYC_19047	chr11	91064579	91065079	501	*	50.5903	-2.46311	0.677196	-3.63722	0.0002756	0.00669449	Distal Intergenic	11	91157994	91194078	36085	1	105369427	ENST00000666286.1	-92915	NA	LINC02748	long intergenic non-protein coding RNA 2748
NYC_19048	chr11	91066057	91066557	501	*	40.9853	-2.52766	0.609756	-4.14537	3.39e-05	0.00293458	Distal Intergenic	11	91157994	91194078	36085	1	105369427	ENST00000666286.1	-91437	NA	LINC02748	long intergenic non-protein coding RNA 2748
NYC_19049	chr11	91067614	91068114	501	*	61.6671	-1.88512	0.516016	-3.65322	0.000258971	0.00653991	Distal Intergenic	11	91157994	91194078	36085	1	105369427	ENST00000666286.1	-89880	NA	LINC02748	long intergenic non-protein coding RNA 2748
NYC_19050	chr11	91068482	91068982	501	*	48.9466	-1.79969	0.581565	-3.09456	0.00197105	0.0180621	Distal Intergenic	11	91157994	91194078	36085	1	105369427	ENST00000666286.1	-89012	NA	LINC02748	long intergenic non-protein coding RNA 2748
NYC_19052	chr11	91069907	91070407	501	*	39.637	-2.02618	0.687277	-2.94812	0.00319709	0.0244024	Distal Intergenic	11	91157994	91194078	36085	1	105369427	ENST00000666286.1	-87587	NA	LINC02748	long intergenic non-protein coding RNA 2748
NYC_19053	chr11	91071100	91071600	501	*	38.2412	-2.38928	0.756721	-3.15741	0.00159177	0.0158912	Distal Intergenic	11	91157994	91194078	36085	1	105369427	ENST00000666286.1	-86394	NA	LINC02748	long intergenic non-protein coding RNA 2748
NYC_19054	chr11	91074046	91074546	501	*	48.877	-2.16649	0.63891	-3.39092	0.000696587	0.01017	Distal Intergenic	11	91157994	91194078	36085	1	105369427	ENST00000666286.1	-83448	NA	LINC02748	long intergenic non-protein coding RNA 2748
NYC_19055	chr11	91075204	91075704	501	*	61.2682	-1.66136	0.551395	-3.01301	0.0025867	0.0213807	Distal Intergenic	11	91157994	91194078	36085	1	105369427	ENST00000666286.1	-82290	NA	LINC02748	long intergenic non-protein coding RNA 2748
NYC_19056	chr11	91076198	91076698	501	*	47.3292	-1.91819	0.658835	-2.91149	0.00359714	0.0263205	Distal Intergenic	11	91157994	91194078	36085	1	105369427	ENST00000666286.1	-81296	NA	LINC02748	long intergenic non-protein coding RNA 2748
NYC_19057	chr11	91076849	91077349	501	*	48.1096	-1.87927	0.57967	-3.24197	0.00118705	0.0134993	Distal Intergenic	11	91157994	91194078	36085	1	105369427	ENST00000666286.1	-80645	NA	LINC02748	long intergenic non-protein coding RNA 2748
NYC_19058	chr11	91079152	91079652	501	*	44.4279	-1.96778	0.586649	-3.35427	0.000795754	0.0109308	Distal Intergenic	11	91157994	91194078	36085	1	105369427	ENST00000666286.1	-78342	NA	LINC02748	long intergenic non-protein coding RNA 2748
NYC_19059	chr11	91080206	91080706	501	*	48.5224	-1.90461	0.539365	-3.53121	0.000413661	0.00797598	Distal Intergenic	11	91157994	91194078	36085	1	105369427	ENST00000666286.1	-77288	NA	LINC02748	long intergenic non-protein coding RNA 2748
NYC_19060	chr11	91080776	91081276	501	*	41.5261	-1.38694	0.520285	-2.66574	0.00768193	0.0449885	Distal Intergenic	11	91157994	91194078	36085	1	105369427	ENST00000666286.1	-76718	NA	LINC02748	long intergenic non-protein coding RNA 2748
NYC_19062	chr11	91082256	91082756	501	*	38.9297	-1.97137	0.734632	-2.68348	0.00728609	0.0431951	Distal Intergenic	11	91157994	91194078	36085	1	105369427	ENST00000666286.1	-75238	NA	LINC02748	long intergenic non-protein coding RNA 2748
NYC_19065	chr11	91085331	91085831	501	*	53.8546	-2.18906	0.579416	-3.77805	0.000158063	0.00524331	Distal Intergenic	11	91157994	91194078	36085	1	105369427	ENST00000666286.1	-72163	NA	LINC02748	long intergenic non-protein coding RNA 2748
NYC_19067	chr11	91086792	91087292	501	*	37.0467	-2.24469	0.640635	-3.50385	0.000458577	0.00834231	Distal Intergenic	11	91157994	91194078	36085	1	105369427	ENST00000666286.1	-70702	NA	LINC02748	long intergenic non-protein coding RNA 2748
NYC_19068	chr11	91087909	91088409	501	*	46.8574	-1.96877	0.713283	-2.76016	0.00577735	0.0364783	Distal Intergenic	11	91157994	91194078	36085	1	105369427	ENST00000666286.1	-69585	NA	LINC02748	long intergenic non-protein coding RNA 2748
NYC_19071	chr11	91092217	91092717	501	*	32.5146	-2.2312	0.750816	-2.97171	0.0029615	0.0232259	Distal Intergenic	11	91157994	91194078	36085	1	105369427	ENST00000666286.1	-65277	NA	LINC02748	long intergenic non-protein coding RNA 2748
NYC_19073	chr11	91093498	91093998	501	*	56.5382	-1.9826	0.619775	-3.19891	0.00137948	0.0146955	Exon (ENST00000625137.1/ENST00000625137.1, exon 1 of 1)	11	91157994	91194078	36085	1	105369427	ENST00000666286.1	-63996	NA	LINC02748	long intergenic non-protein coding RNA 2748
NYC_19074	chr11	91094379	91094879	501	*	40.6257	-2.2414	0.644543	-3.4775	0.000506115	0.00869925	Distal Intergenic	11	91157994	91194078	36085	1	105369427	ENST00000666286.1	-63115	NA	LINC02748	long intergenic non-protein coding RNA 2748
NYC_19076	chr11	91096657	91097157	501	*	44.8851	-2.16569	0.686785	-3.15337	0.00161397	0.0160398	Distal Intergenic	11	91157994	91194078	36085	1	105369427	ENST00000666286.1	-60837	NA	LINC02748	long intergenic non-protein coding RNA 2748
NYC_19077	chr11	91097538	91098038	501	*	49.9216	-1.78796	0.5939	-3.01054	0.00260781	0.0214663	Distal Intergenic	11	91157994	91194078	36085	1	105369427	ENST00000666286.1	-59956	NA	LINC02748	long intergenic non-protein coding RNA 2748
NYC_19078	chr11	91098481	91098981	501	*	47.2551	-1.88546	0.624178	-3.02071	0.00252179	0.0210479	Distal Intergenic	11	91157994	91194078	36085	1	105369427	ENST00000666286.1	-59013	NA	LINC02748	long intergenic non-protein coding RNA 2748
NYC_19080	chr11	91101070	91101570	501	*	55.8625	-1.33274	0.431977	-3.08521	0.00203407	0.0184252	Distal Intergenic	11	91157994	91194078	36085	1	105369427	ENST00000666286.1	-56424	NA	LINC02748	long intergenic non-protein coding RNA 2748
NYC_19081	chr11	91101714	91102214	501	*	43.4902	-1.95187	0.620868	-3.14377	0.00166787	0.0163303	Distal Intergenic	11	91157994	91194078	36085	1	105369427	ENST00000666286.1	-55780	NA	LINC02748	long intergenic non-protein coding RNA 2748
NYC_19082	chr11	91102613	91103113	501	*	43.3707	-2.38984	0.557006	-4.29051	1.78e-05	0.00231812	Distal Intergenic	11	91157994	91194078	36085	1	105369427	ENST00000666286.1	-54881	NA	LINC02748	long intergenic non-protein coding RNA 2748
NYC_19083	chr11	91103366	91103866	501	*	60.7816	-1.85046	0.409119	-4.52304	6.1e-06	0.00164006	Distal Intergenic	11	91157994	91194078	36085	1	105369427	ENST00000666286.1	-54128	NA	LINC02748	long intergenic non-protein coding RNA 2748
NYC_19086	chr11	91107888	91108388	501	*	61.412	-2.09805	0.478671	-4.38307	1.17e-05	0.00202578	Distal Intergenic	11	91157994	91194078	36085	1	105369427	ENST00000666286.1	-49606	NA	LINC02748	long intergenic non-protein coding RNA 2748
NYC_19087	chr11	91111347	91111847	501	*	51.7198	-2.16576	0.552394	-3.92067	8.83e-05	0.00414302	Distal Intergenic	11	91157994	91194078	36085	1	105369427	ENST00000666286.1	-46147	NA	LINC02748	long intergenic non-protein coding RNA 2748
NYC_19090	chr11	91114078	91114578	501	*	36.9649	-2.06609	0.703932	-2.93507	0.00333468	0.0250761	Distal Intergenic	11	91157994	91194078	36085	1	105369427	ENST00000666286.1	-43416	NA	LINC02748	long intergenic non-protein coding RNA 2748
NYC_19091	chr11	91114968	91115468	501	*	48.6695	-1.76235	0.548034	-3.21576	0.00130098	0.0141827	Exon (ENST00000526582.1/ENST00000526582.1, exon 1 of 1)	11	91157994	91194078	36085	1	105369427	ENST00000666286.1	-42526	NA	LINC02748	long intergenic non-protein coding RNA 2748
NYC_19092	chr11	91116117	91116617	501	*	42.97	-1.59504	0.591063	-2.69859	0.00696332	0.0417822	Exon (ENST00000534523.1/ENST00000534523.1, exon 1 of 1)	11	91157994	91194078	36085	1	105369427	ENST00000666286.1	-41377	NA	LINC02748	long intergenic non-protein coding RNA 2748
NYC_19093	chr11	91117771	91118271	501	*	40.8012	-2.16421	0.696419	-3.10762	0.00188598	0.0176165	Distal Intergenic	11	91157994	91194078	36085	1	105369427	ENST00000666286.1	-39723	NA	LINC02748	long intergenic non-protein coding RNA 2748
NYC_19095	chr11	91118992	91119492	501	*	15.1868	-1.49588	0.533141	-2.80579	0.00501929	0.0330426	Distal Intergenic	11	91157994	91194078	36085	1	105369427	ENST00000666286.1	-38502	NA	LINC02748	long intergenic non-protein coding RNA 2748
NYC_19096	chr11	91119509	91120009	501	*	32.1338	-1.93232	0.665201	-2.90487	0.00367406	0.0267253	Distal Intergenic	11	91157994	91194078	36085	1	105369427	ENST00000666286.1	-37985	NA	LINC02748	long intergenic non-protein coding RNA 2748
NYC_19097	chr11	91131293	91131793	501	*	40.1194	-1.94571	0.596308	-3.26292	0.00110269	0.012921	Distal Intergenic	11	91157994	91194078	36085	1	105369427	ENST00000666286.1	-26201	NA	LINC02748	long intergenic non-protein coding RNA 2748
NYC_19098	chr11	91132866	91133366	501	*	51.2709	-1.8328	0.560967	-3.26721	0.00108613	0.012801	Distal Intergenic	11	91157994	91194078	36085	1	105369427	ENST00000666286.1	-24628	NA	LINC02748	long intergenic non-protein coding RNA 2748
NYC_19099	chr11	91136123	91136623	501	*	43.656	-1.80744	0.583323	-3.09852	0.0019449	0.0179372	Distal Intergenic	11	91157994	91194078	36085	1	105369427	ENST00000666286.1	-21371	NA	LINC02748	long intergenic non-protein coding RNA 2748
NYC_19101	chr11	91146992	91147492	501	*	46.5716	-2.33941	0.790819	-2.95821	0.00309433	0.0239184	Distal Intergenic	11	91157994	91194078	36085	1	105369427	ENST00000666286.1	-10502	NA	LINC02748	long intergenic non-protein coding RNA 2748
NYC_19102	chr11	91148636	91149136	501	*	43.5665	-2.03335	0.539748	-3.76722	0.000165076	0.00532154	Distal Intergenic	11	91157994	91194078	36085	1	105369427	ENST00000666286.1	-8858	NA	LINC02748	long intergenic non-protein coding RNA 2748
NYC_19103	chr11	91149974	91150474	501	*	41.1281	-2.07203	0.559518	-3.70325	0.000212856	0.00596008	Distal Intergenic	11	91157994	91194078	36085	1	105369427	ENST00000666286.1	-7520	NA	LINC02748	long intergenic non-protein coding RNA 2748
NYC_19104	chr11	91152016	91152516	501	*	44.5295	-1.89956	0.581931	-3.26424	0.00109757	0.012888	Distal Intergenic	11	91157994	91194078	36085	1	105369427	ENST00000666286.1	-5478	NA	LINC02748	long intergenic non-protein coding RNA 2748
NYC_19105	chr11	91152645	91153145	501	*	40.2729	-1.67322	0.633349	-2.64186	0.00824522	0.0473404	Distal Intergenic	11	91157994	91194078	36085	1	105369427	ENST00000666286.1	-4849	NA	LINC02748	long intergenic non-protein coding RNA 2748
NYC_19106	chr11	91156498	91156998	501	*	48.4613	-2.17884	0.554953	-3.92617	8.63e-05	0.0041054	Promoter (<=1kb)	11	91157994	91194078	36085	1	105369427	ENST00000666286.1	-996	NA	LINC02748	long intergenic non-protein coding RNA 2748
NYC_19112	chr11	91169369	91169869	501	*	46.5301	-1.78104	0.570186	-3.12362	0.00178642	0.0170754	Intron (ENST00000666286.1/105369427, intron 3 of 4)	11	91158024	91234388	76365	1	105369427	ENST00000526509.2	11345	NA	LINC02748	long intergenic non-protein coding RNA 2748
NYC_19113	chr11	91170451	91170951	501	*	36.8539	-1.81563	0.598346	-3.03441	0.00241008	0.0204737	Intron (ENST00000666286.1/105369427, intron 3 of 4)	11	91158024	91234388	76365	1	105369427	ENST00000526509.2	12427	NA	LINC02748	long intergenic non-protein coding RNA 2748
NYC_19115	chr11	91176719	91177219	501	*	44.2255	-1.93725	0.509647	-3.80117	0.000144017	0.0050675	Intron (ENST00000666286.1/105369427, intron 3 of 4)	11	91158024	91234388	76365	1	105369427	ENST00000526509.2	18695	NA	LINC02748	long intergenic non-protein coding RNA 2748
NYC_19116	chr11	91183281	91183781	501	*	46.0016	-1.51285	0.535502	-2.8251	0.00472656	0.0316067	Intron (ENST00000666286.1/105369427, intron 3 of 4)	11	91158024	91234388	76365	1	105369427	ENST00000526509.2	25257	NA	LINC02748	long intergenic non-protein coding RNA 2748
NYC_19117	chr11	91184055	91184555	501	*	70.7815	-1.87193	0.633995	-2.95259	0.00315121	0.0241842	Intron (ENST00000666286.1/105369427, intron 3 of 4)	11	91158024	91234388	76365	1	105369427	ENST00000526509.2	26031	NA	LINC02748	long intergenic non-protein coding RNA 2748
NYC_19118	chr11	91188242	91188742	501	*	42.6395	-2.02651	0.703297	-2.88145	0.00395852	0.028096	Intron (ENST00000666286.1/105369427, intron 3 of 4)	11	91158024	91234388	76365	1	105369427	ENST00000526509.2	30218	NA	LINC02748	long intergenic non-protein coding RNA 2748
NYC_19119	chr11	91191496	91191996	501	*	46.8524	-1.67715	0.539127	-3.11087	0.00186538	0.0175217	Intron (ENST00000666286.1/105369427, intron 3 of 4)	11	91158024	91234388	76365	1	105369427	ENST00000526509.2	33472	NA	LINC02748	long intergenic non-protein coding RNA 2748
NYC_19120	chr11	91193909	91194409	501	*	36.2716	-1.70084	0.620822	-2.73965	0.0061504	0.0381531	Exon (ENST00000666286.1/105369427, exon 5 of 5)	11	91158024	91234388	76365	1	105369427	ENST00000526509.2	35885	NA	LINC02748	long intergenic non-protein coding RNA 2748
NYC_19123	chr11	91201544	91202044	501	*	32.7813	-1.94516	0.699409	-2.78115	0.00541664	0.0348822	Intron (ENST00000526509.2/105369427, intron 4 of 4)	11	91158024	91234388	76365	1	105369427	ENST00000526509.2	43520	NA	LINC02748	long intergenic non-protein coding RNA 2748
NYC_19124	chr11	91203658	91204158	501	*	25.5991	-2.41376	0.850095	-2.8394	0.0045198	0.0307574	Intron (ENST00000526509.2/105369427, intron 4 of 4)	11	91158024	91234388	76365	1	105369427	ENST00000526509.2	45634	NA	LINC02748	long intergenic non-protein coding RNA 2748
NYC_19125	chr11	91216837	91217337	501	*	63.8627	-1.22435	0.41541	-2.94732	0.00320541	0.0244391	Intron (ENST00000526509.2/105369427, intron 4 of 4)	11	91158024	91234388	76365	1	105369427	ENST00000526509.2	58813	NA	LINC02748	long intergenic non-protein coding RNA 2748
NYC_19128	chr11	91226208	91226708	501	*	42.0756	-1.82299	0.612571	-2.97596	0.00292069	0.0230392	Intron (ENST00000526509.2/105369427, intron 4 of 4)	11	91158024	91234388	76365	1	105369427	ENST00000526509.2	68184	NA	LINC02748	long intergenic non-protein coding RNA 2748
NYC_19129	chr11	91227102	91227602	501	*	41.8946	-2.00695	0.605335	-3.31543	0.000915022	0.0117428	Intron (ENST00000526509.2/105369427, intron 4 of 4)	11	91158024	91234388	76365	1	105369427	ENST00000526509.2	69078	NA	LINC02748	long intergenic non-protein coding RNA 2748
NYC_19130	chr11	91231528	91232028	501	*	44.3891	-2.74677	0.617051	-4.45144	8.53e-06	0.00185801	Intron (ENST00000526509.2/105369427, intron 4 of 4)	11	91158024	91234388	76365	1	105369427	ENST00000526509.2	73504	NA	LINC02748	long intergenic non-protein coding RNA 2748
NYC_19133	chr11	91240238	91240738	501	*	43.9905	-2.0313	0.679658	-2.98872	0.00280151	0.0224472	Distal Intergenic	11	91158024	91234388	76365	1	105369427	ENST00000526509.2	82214	NA	LINC02748	long intergenic non-protein coding RNA 2748
NYC_19134	chr11	91244894	91245394	501	*	47.3978	-1.62004	0.592124	-2.73599	0.00621933	0.0384553	Distal Intergenic	11	91158024	91234388	76365	1	105369427	ENST00000526509.2	86870	NA	LINC02748	long intergenic non-protein coding RNA 2748
NYC_19135	chr11	91247355	91247855	501	*	50.4508	-1.52938	0.491907	-3.10907	0.00187676	0.0175795	Distal Intergenic	11	91158024	91234388	76365	1	105369427	ENST00000526509.2	89331	NA	LINC02748	long intergenic non-protein coding RNA 2748
NYC_19138	chr11	91250754	91251254	501	*	37.4826	-2.11925	0.592939	-3.57413	0.000351388	0.00743411	Distal Intergenic	11	91158024	91234388	76365	1	105369427	ENST00000526509.2	92730	NA	LINC02748	long intergenic non-protein coding RNA 2748
NYC_19139	chr11	91254457	91254957	501	*	35.7254	-2.27333	0.680153	-3.34238	0.000830635	0.0111624	Distal Intergenic	11	91158024	91234388	76365	1	105369427	ENST00000526509.2	96433	NA	LINC02748	long intergenic non-protein coding RNA 2748
NYC_19140	chr11	91257523	91258023	501	*	38.4365	-2.26991	0.724087	-3.13486	0.00171939	0.0166712	Distal Intergenic	11	91158024	91234388	76365	1	105369427	ENST00000526509.2	99499	NA	LINC02748	long intergenic non-protein coding RNA 2748
NYC_19142	chr11	91267327	91267827	501	*	40.402	-2.05709	0.561766	-3.66182	0.000250429	0.00642941	Distal Intergenic	11	91158024	91234388	76365	1	105369427	ENST00000526509.2	109303	NA	LINC02748	long intergenic non-protein coding RNA 2748
NYC_19143	chr11	91268887	91269387	501	*	63.0451	-1.73907	0.449646	-3.86764	0.000109893	0.00453791	Distal Intergenic	11	91158024	91234388	76365	1	105369427	ENST00000526509.2	110863	NA	LINC02748	long intergenic non-protein coding RNA 2748
NYC_19144	chr11	91269738	91270238	501	*	36.4064	-1.66704	0.577704	-2.88563	0.00390633	0.0278717	Distal Intergenic	11	91158024	91234388	76365	1	105369427	ENST00000526509.2	111714	NA	LINC02748	long intergenic non-protein coding RNA 2748
NYC_19145	chr11	91270357	91270857	501	*	52.0274	-1.55013	0.412078	-3.76173	0.000168739	0.00537935	Distal Intergenic	11	91158024	91234388	76365	1	105369427	ENST00000526509.2	112333	NA	LINC02748	long intergenic non-protein coding RNA 2748
NYC_19146	chr11	91271696	91272196	501	*	44.0275	-1.77791	0.633742	-2.80541	0.00502529	0.0330728	Distal Intergenic	11	91158024	91234388	76365	1	105369427	ENST00000526509.2	113672	NA	LINC02748	long intergenic non-protein coding RNA 2748
NYC_19147	chr11	91279572	91280072	501	*	51.3018	-1.5617	0.591563	-2.63995	0.00829179	0.0475297	Distal Intergenic	11	91158024	91234388	76365	1	105369427	ENST00000526509.2	121548	NA	LINC02748	long intergenic non-protein coding RNA 2748
NYC_19148	chr11	91281963	91282463	501	*	40.383	-2.19653	0.675148	-3.25341	0.00114029	0.013175	Distal Intergenic	11	91158024	91234388	76365	1	105369427	ENST00000526509.2	123939	NA	LINC02748	long intergenic non-protein coding RNA 2748
NYC_19149	chr11	91285078	91285578	501	*	38.3467	-2.36249	0.707846	-3.33758	0.000845121	0.0112935	Distal Intergenic	11	91158024	91234388	76365	1	105369427	ENST00000526509.2	127054	NA	LINC02748	long intergenic non-protein coding RNA 2748
NYC_19153	chr11	91299086	91299586	501	*	38.8189	-1.97251	0.60354	-3.26823	0.00108223	0.0127776	Distal Intergenic	11	91158024	91234388	76365	1	105369427	ENST00000526509.2	141062	NA	LINC02748	long intergenic non-protein coding RNA 2748
NYC_19155	chr11	91300559	91301059	501	*	41.01	-1.66733	0.56817	-2.93457	0.00334015	0.025107	Distal Intergenic	11	91158024	91234388	76365	1	105369427	ENST00000526509.2	142535	NA	LINC02748	long intergenic non-protein coding RNA 2748
NYC_19156	chr11	91301152	91301652	501	*	31.5371	-2.04359	0.681716	-2.99771	0.00272013	0.0220469	Distal Intergenic	11	91158024	91234388	76365	1	105369427	ENST00000526509.2	143128	NA	LINC02748	long intergenic non-protein coding RNA 2748
NYC_19157	chr11	91301822	91302322	501	*	42.6906	-2.01747	0.633507	-3.18461	0.00144947	0.0151751	Distal Intergenic	11	91158024	91234388	76365	1	105369427	ENST00000526509.2	143798	NA	LINC02748	long intergenic non-protein coding RNA 2748
NYC_19158	chr11	91305439	91305939	501	*	50.9597	-1.65921	0.542074	-3.06085	0.00220712	0.0193259	Distal Intergenic	11	91158024	91234388	76365	1	105369427	ENST00000526509.2	147415	NA	LINC02748	long intergenic non-protein coding RNA 2748
NYC_19159	chr11	91307028	91307528	501	*	52.0625	-1.58726	0.532807	-2.97905	0.0028914	0.0228983	Distal Intergenic	11	91158024	91234388	76365	1	105369427	ENST00000526509.2	149004	NA	LINC02748	long intergenic non-protein coding RNA 2748
NYC_19160	chr11	91308284	91308784	501	*	56.6712	-1.32648	0.465932	-2.84693	0.00441427	0.0302417	Distal Intergenic	11	91158024	91234388	76365	1	105369427	ENST00000526509.2	150260	NA	LINC02748	long intergenic non-protein coding RNA 2748
NYC_19161	chr11	91310725	91311225	501	*	45.3203	-1.99601	0.621091	-3.21372	0.00131029	0.0142402	Distal Intergenic	11	91158024	91234388	76365	1	105369427	ENST00000526509.2	152701	NA	LINC02748	long intergenic non-protein coding RNA 2748
NYC_19162	chr11	91312428	91312928	501	*	51.6708	-1.62617	0.601228	-2.70475	0.0068355	0.0412142	Distal Intergenic	11	91158024	91234388	76365	1	105369427	ENST00000526509.2	154404	NA	LINC02748	long intergenic non-protein coding RNA 2748
NYC_19163	chr11	91313399	91313899	501	*	44.4743	-1.87457	0.688629	-2.72218	0.00648525	0.039667	Distal Intergenic	11	91158024	91234388	76365	1	105369427	ENST00000526509.2	155375	NA	LINC02748	long intergenic non-protein coding RNA 2748
NYC_19164	chr11	91314497	91314997	501	*	50.1602	-1.83048	0.5004	-3.65803	0.000254164	0.00647061	Distal Intergenic	11	91158024	91234388	76365	1	105369427	ENST00000526509.2	156473	NA	LINC02748	long intergenic non-protein coding RNA 2748
NYC_19165	chr11	91315175	91315675	501	*	39.1858	-2.20865	0.667319	-3.30974	0.000933831	0.011881	Distal Intergenic	11	91158024	91234388	76365	1	105369427	ENST00000526509.2	157151	NA	LINC02748	long intergenic non-protein coding RNA 2748
NYC_19166	chr11	91315877	91316377	501	*	36.7676	-1.94583	0.59898	-3.24857	0.00115985	0.0133255	Distal Intergenic	11	91158024	91234388	76365	1	105369427	ENST00000526509.2	157853	NA	LINC02748	long intergenic non-protein coding RNA 2748
NYC_19167	chr11	91316402	91316902	501	*	38.5307	-1.79818	0.601619	-2.9889	0.00279983	0.0224424	Distal Intergenic	11	91158024	91234388	76365	1	105369427	ENST00000526509.2	158378	NA	LINC02748	long intergenic non-protein coding RNA 2748
NYC_19168	chr11	91321668	91322168	501	*	50.4317	-1.82889	0.438426	-4.17149	3.03e-05	0.00285643	Distal Intergenic	11	91158024	91234388	76365	1	105369427	ENST00000526509.2	163644	NA	LINC02748	long intergenic non-protein coding RNA 2748
NYC_19169	chr11	91322224	91322724	501	*	37.1294	-1.71612	0.632325	-2.71398	0.00664793	0.0403882	Distal Intergenic	11	91158024	91234388	76365	1	105369427	ENST00000526509.2	164200	NA	LINC02748	long intergenic non-protein coding RNA 2748
NYC_19170	chr11	91326076	91326576	501	*	46.4726	-1.5901	0.582163	-2.73136	0.00630728	0.0388248	Distal Intergenic	11	91158024	91234388	76365	1	105369427	ENST00000526509.2	168052	NA	LINC02748	long intergenic non-protein coding RNA 2748
NYC_19171	chr11	91328181	91328681	501	*	49.8749	-1.79829	0.620579	-2.89776	0.00375842	0.0271359	Distal Intergenic	11	91158024	91234388	76365	1	105369427	ENST00000526509.2	170157	NA	LINC02748	long intergenic non-protein coding RNA 2748
NYC_19172	chr11	91331077	91331577	501	*	37.926	-2.17537	0.774529	-2.80864	0.00497518	0.0328256	Distal Intergenic	11	91158024	91234388	76365	1	105369427	ENST00000526509.2	173053	NA	LINC02748	long intergenic non-protein coding RNA 2748
NYC_19173	chr11	91334300	91334800	501	*	39.3489	-2.01216	0.575251	-3.49789	0.000468953	0.00840462	Distal Intergenic	11	91158024	91234388	76365	1	105369427	ENST00000526509.2	176276	NA	LINC02748	long intergenic non-protein coding RNA 2748
NYC_19174	chr11	91334910	91335410	501	*	57.8413	-1.39388	0.476982	-2.9223	0.00347459	0.0257745	Distal Intergenic	11	91158024	91234388	76365	1	105369427	ENST00000526509.2	176886	NA	LINC02748	long intergenic non-protein coding RNA 2748
NYC_19175	chr11	91336166	91336666	501	*	53.401	-1.67816	0.381736	-4.39612	1.1e-05	0.00197586	Distal Intergenic	11	91158024	91234388	76365	1	105369427	ENST00000526509.2	178142	NA	LINC02748	long intergenic non-protein coding RNA 2748
NYC_19176	chr11	91338857	91339357	501	*	35.7425	-2.20562	0.7536	-2.92678	0.00342491	0.025521	Distal Intergenic	11	91158024	91234388	76365	1	105369427	ENST00000526509.2	180833	NA	LINC02748	long intergenic non-protein coding RNA 2748
NYC_19177	chr11	91341709	91342209	501	*	34.5383	-2.3262	0.730594	-3.18398	0.00145264	0.0151927	Distal Intergenic	11	91158024	91234388	76365	1	105369427	ENST00000526509.2	183685	NA	LINC02748	long intergenic non-protein coding RNA 2748
NYC_19178	chr11	91345380	91345880	501	*	29.3093	-2.60642	0.75544	-3.45021	0.000560158	0.00915821	Distal Intergenic	11	91158024	91234388	76365	1	105369427	ENST00000526509.2	187356	NA	LINC02748	long intergenic non-protein coding RNA 2748
NYC_19180	chr11	91347986	91348486	501	*	39.5624	-2.21022	0.523945	-4.21842	2.46e-05	0.00260281	Distal Intergenic	11	91158024	91234388	76365	1	105369427	ENST00000526509.2	189962	NA	LINC02748	long intergenic non-protein coding RNA 2748
NYC_19181	chr11	91350746	91351246	501	*	48.8101	-1.70245	0.513142	-3.3177	0.000907612	0.0117019	Distal Intergenic	11	91158024	91234388	76365	1	105369427	ENST00000526509.2	192722	NA	LINC02748	long intergenic non-protein coding RNA 2748
NYC_19182	chr11	91356024	91356524	501	*	42.1854	-1.95052	0.619056	-3.1508	0.00162822	0.0161079	Distal Intergenic	11	91158024	91234388	76365	1	105369427	ENST00000526509.2	198000	NA	LINC02748	long intergenic non-protein coding RNA 2748
NYC_19183	chr11	91356712	91357212	501	*	30.4049	-2.22522	0.546868	-4.06904	4.72e-05	0.00327608	Distal Intergenic	11	91158024	91234388	76365	1	105369427	ENST00000526509.2	198688	NA	LINC02748	long intergenic non-protein coding RNA 2748
NYC_19184	chr11	91366769	91367269	501	*	41.6642	-1.39917	0.501339	-2.79087	0.00525668	0.034147	Distal Intergenic	11	91158024	91234388	76365	1	105369427	ENST00000526509.2	208745	NA	LINC02748	long intergenic non-protein coding RNA 2748
NYC_19185	chr11	91368721	91369221	501	*	42.0343	-1.90249	0.661288	-2.87694	0.00401551	0.0283755	Distal Intergenic	11	91158024	91234388	76365	1	105369427	ENST00000526509.2	210697	NA	LINC02748	long intergenic non-protein coding RNA 2748
NYC_19186	chr11	91369843	91370343	501	*	46.0646	-1.94348	0.572989	-3.39184	0.000694257	0.0101583	Distal Intergenic	11	91158024	91234388	76365	1	105369427	ENST00000526509.2	211819	NA	LINC02748	long intergenic non-protein coding RNA 2748
NYC_19187	chr11	91378412	91378912	501	*	50.9436	-1.83398	0.555362	-3.30231	0.000958924	0.012036	Distal Intergenic	11	91158024	91234388	76365	1	105369427	ENST00000526509.2	220388	NA	LINC02748	long intergenic non-protein coding RNA 2748
NYC_19188	chr11	91379921	91380421	501	*	52.3944	-1.94063	0.565983	-3.42879	0.000606288	0.00951352	Distal Intergenic	11	91158024	91234388	76365	1	105369427	ENST00000526509.2	221897	NA	LINC02748	long intergenic non-protein coding RNA 2748
NYC_19189	chr11	91381487	91381987	501	*	40.6865	-2.15043	0.736283	-2.92065	0.003493	0.0258699	Distal Intergenic	11	91158024	91234388	76365	1	105369427	ENST00000526509.2	223463	NA	LINC02748	long intergenic non-protein coding RNA 2748
NYC_19190	chr11	91382468	91382968	501	*	42.1472	-2.3082	0.527576	-4.37511	1.21e-05	0.00206081	Exon (ENST00000623291.1/ENST00000623291.1, exon 1 of 1)	11	91158024	91234388	76365	1	105369427	ENST00000526509.2	224444	NA	LINC02748	long intergenic non-protein coding RNA 2748
NYC_19191	chr11	91391063	91391563	501	*	34.8073	-2.40216	0.596367	-4.02799	5.63e-05	0.00349521	Distal Intergenic	11	91158024	91234388	76365	1	105369427	ENST00000526509.2	233039	NA	LINC02748	long intergenic non-protein coding RNA 2748
NYC_19192	chr11	91392490	91392990	501	*	50.4129	-2.15745	0.602537	-3.5806	0.000342801	0.00734689	Distal Intergenic	11	91158024	91234388	76365	1	105369427	ENST00000526509.2	234466	NA	LINC02748	long intergenic non-protein coding RNA 2748
NYC_19194	chr11	91397448	91397948	501	*	40.5522	-1.89428	0.654418	-2.8946	0.00379646	0.0273424	Distal Intergenic	11	91158024	91234388	76365	1	105369427	ENST00000526509.2	239424	NA	LINC02748	long intergenic non-protein coding RNA 2748
NYC_19195	chr11	91399819	91400319	501	*	48.3512	-2.07496	0.753474	-2.75386	0.00588975	0.0369685	Distal Intergenic	11	91158024	91234388	76365	1	105369427	ENST00000526509.2	241795	NA	LINC02748	long intergenic non-protein coding RNA 2748
NYC_19196	chr11	91402159	91402659	501	*	56.6716	-1.8055	0.479885	-3.76236	0.000168315	0.00537504	Distal Intergenic	11	91158024	91234388	76365	1	105369427	ENST00000526509.2	244135	NA	LINC02748	long intergenic non-protein coding RNA 2748
NYC_19198	chr11	91411010	91411510	501	*	49.0075	-1.68815	0.628735	-2.68499	0.00725322	0.0430596	Distal Intergenic	11	91158024	91234388	76365	1	105369427	ENST00000526509.2	252986	NA	LINC02748	long intergenic non-protein coding RNA 2748
NYC_19199	chr11	91412925	91413425	501	*	47.0732	-1.94712	0.488511	-3.98582	6.72e-05	0.00375275	Distal Intergenic	11	91158024	91234388	76365	1	105369427	ENST00000526509.2	254901	NA	LINC02748	long intergenic non-protein coding RNA 2748
NYC_19200	chr11	91415194	91415694	501	*	29.911	-1.91542	0.717695	-2.66885	0.00761105	0.044667	Distal Intergenic	11	91158024	91234388	76365	1	105369427	ENST00000526509.2	257170	NA	LINC02748	long intergenic non-protein coding RNA 2748
NYC_19202	chr11	91417084	91417584	501	*	50.8774	-1.93432	0.584564	-3.30899	0.000936335	0.0118966	Distal Intergenic	11	91158024	91234388	76365	1	105369427	ENST00000526509.2	259060	NA	LINC02748	long intergenic non-protein coding RNA 2748
NYC_19203	chr11	91418587	91419087	501	*	50.4486	-1.32274	0.454858	-2.90804	0.00363703	0.0265256	Distal Intergenic	11	91158024	91234388	76365	1	105369427	ENST00000526509.2	260563	NA	LINC02748	long intergenic non-protein coding RNA 2748
NYC_19204	chr11	91421419	91421919	501	*	44.5661	-1.62161	0.534522	-3.03376	0.00241529	0.0204981	Distal Intergenic	11	91158024	91234388	76365	1	105369427	ENST00000526509.2	263395	NA	LINC02748	long intergenic non-protein coding RNA 2748
NYC_19207	chr11	91427697	91428197	501	*	59.7564	-2.20199	0.542205	-4.06118	4.88e-05	0.00330927	Distal Intergenic	11	91158024	91234388	76365	1	105369427	ENST00000526509.2	269673	NA	LINC02748	long intergenic non-protein coding RNA 2748
NYC_19208	chr11	91428738	91429238	501	*	36.3433	-2.45157	0.614962	-3.98654	6.7e-05	0.00374701	Distal Intergenic	11	91158024	91234388	76365	1	105369427	ENST00000526509.2	270714	NA	LINC02748	long intergenic non-protein coding RNA 2748
NYC_19209	chr11	91431884	91432384	501	*	34.6587	-2.26912	0.675354	-3.3599	0.000779705	0.0107944	Distal Intergenic	11	91158024	91234388	76365	1	105369427	ENST00000526509.2	273860	NA	LINC02748	long intergenic non-protein coding RNA 2748
NYC_19211	chr11	91433374	91433874	501	*	45.2092	-1.9136	0.554667	-3.44999	0.000560597	0.00915821	Distal Intergenic	11	91158024	91234388	76365	1	105369427	ENST00000526509.2	275350	NA	LINC02748	long intergenic non-protein coding RNA 2748
NYC_19212	chr11	91435601	91436101	501	*	46.0848	-1.34814	0.498475	-2.70453	0.00684016	0.041229	Distal Intergenic	11	91158024	91234388	76365	1	105369427	ENST00000526509.2	277577	NA	LINC02748	long intergenic non-protein coding RNA 2748
NYC_19213	chr11	91442411	91442911	501	*	44.2223	-1.72413	0.505708	-3.40934	0.000651201	0.00988159	Distal Intergenic	11	91158024	91234388	76365	1	105369427	ENST00000526509.2	284387	NA	LINC02748	long intergenic non-protein coding RNA 2748
NYC_19214	chr11	91444119	91444619	501	*	40.1903	-2.2536	0.671205	-3.35754	0.00078638	0.01086	Distal Intergenic	11	91158024	91234388	76365	1	105369427	ENST00000526509.2	286095	NA	LINC02748	long intergenic non-protein coding RNA 2748
NYC_19215	chr11	91445755	91446255	501	*	60.535	-1.45033	0.413672	-3.50599	0.000454904	0.00832923	Distal Intergenic	11	91158024	91234388	76365	1	105369427	ENST00000526509.2	287731	NA	LINC02748	long intergenic non-protein coding RNA 2748
NYC_19216	chr11	91446441	91446941	501	*	39.7111	-1.72671	0.621316	-2.77911	0.0054508	0.0350537	Distal Intergenic	11	91158024	91234388	76365	1	105369427	ENST00000526509.2	288417	NA	LINC02748	long intergenic non-protein coding RNA 2748
NYC_19217	chr11	91447509	91448009	501	*	42.8684	-2.17728	0.596198	-3.65194	0.00026027	0.00654289	Distal Intergenic	11	91158024	91234388	76365	1	105369427	ENST00000526509.2	289485	NA	LINC02748	long intergenic non-protein coding RNA 2748
NYC_19218	chr11	91452429	91452929	501	*	41.5937	-2.52811	0.725925	-3.4826	0.00049657	0.00862869	Distal Intergenic	11	91158024	91234388	76365	1	105369427	ENST00000526509.2	294405	NA	LINC02748	long intergenic non-protein coding RNA 2748
NYC_19220	chr11	91461064	91461564	501	*	37.4864	-1.64169	0.562544	-2.91834	0.00351903	0.0259813	Distal Intergenic	11	91158024	91234388	76365	1	105369427	ENST00000526509.2	303040	NA	LINC02748	long intergenic non-protein coding RNA 2748
NYC_19221	chr11	91469577	91470077	501	*	40.8421	-1.93766	0.591179	-3.27762	0.00104688	0.0125916	Distal Intergenic	11	91158024	91234388	76365	1	105369427	ENST00000526509.2	311553	NA	LINC02748	long intergenic non-protein coding RNA 2748
NYC_19222	chr11	91470562	91471062	501	*	79.389	-1.0568	0.183644	-5.7546	8.68e-09	6.94e-05	Distal Intergenic	11	91158024	91234388	76365	1	105369427	ENST00000526509.2	312538	NA	LINC02748	long intergenic non-protein coding RNA 2748
NYC_19223	chr11	91472902	91473402	501	*	35.0009	-2.33294	0.703805	-3.31475	0.000917253	0.0117557	Distal Intergenic	11	91158024	91234388	76365	1	105369427	ENST00000526509.2	314878	NA	LINC02748	long intergenic non-protein coding RNA 2748
NYC_19224	chr11	91474011	91474511	501	*	33.9337	-2.65567	0.775933	-3.42255	0.000620363	0.00963847	Distal Intergenic	11	91158024	91234388	76365	1	105369427	ENST00000526509.2	315987	NA	LINC02748	long intergenic non-protein coding RNA 2748
NYC_19225	chr11	91475269	91475769	501	*	61.9026	-1.9971	0.452822	-4.41034	1.03e-05	0.00195374	Distal Intergenic	11	91158024	91234388	76365	1	105369427	ENST00000526509.2	317245	NA	LINC02748	long intergenic non-protein coding RNA 2748
NYC_19226	chr11	91483050	91483550	501	*	45.914	-1.9862	0.712446	-2.78786	0.0053058	0.0343854	Distal Intergenic	11	91794319	91812280	17962	1	105369428	ENST00000655162.1	-310769	NA	LINC02756	long intergenic non-protein coding RNA 2756
NYC_19227	chr11	91489278	91489778	501	*	50.2187	-1.53526	0.508181	-3.02109	0.0025187	0.0210395	Distal Intergenic	11	91794319	91812280	17962	1	105369428	ENST00000655162.1	-304541	NA	LINC02756	long intergenic non-protein coding RNA 2756
NYC_19229	chr11	91495483	91495983	501	*	51.1942	-1.50578	0.421596	-3.57162	0.000354784	0.00747797	Distal Intergenic	11	91794319	91812280	17962	1	105369428	ENST00000655162.1	-298336	NA	LINC02756	long intergenic non-protein coding RNA 2756
NYC_19230	chr11	91500768	91501268	501	*	42.5423	-1.80435	0.618085	-2.91926	0.00350868	0.0259414	Distal Intergenic	11	91794319	91812280	17962	1	105369428	ENST00000655162.1	-293051	NA	LINC02756	long intergenic non-protein coding RNA 2756
NYC_19232	chr11	91512851	91513351	501	*	41.764	-1.72984	0.546839	-3.16335	0.00155965	0.0157109	Distal Intergenic	11	91794319	91812280	17962	1	105369428	ENST00000655162.1	-280968	NA	LINC02756	long intergenic non-protein coding RNA 2756
NYC_19233	chr11	91514502	91515002	501	*	42.7961	-1.8921	0.684041	-2.76606	0.00567382	0.0360444	Distal Intergenic	11	91794319	91812280	17962	1	105369428	ENST00000655162.1	-279317	NA	LINC02756	long intergenic non-protein coding RNA 2756
NYC_19234	chr11	91520040	91520540	501	*	35.9767	-2.0078	0.627853	-3.19788	0.00138442	0.0147229	Distal Intergenic	11	91794319	91812280	17962	1	105369428	ENST00000655162.1	-273779	NA	LINC02756	long intergenic non-protein coding RNA 2756
NYC_19235	chr11	91523343	91523843	501	*	39.7393	-2.31184	0.60429	-3.82571	0.000130394	0.00481847	Distal Intergenic	11	91794319	91812280	17962	1	105369428	ENST00000655162.1	-270476	NA	LINC02756	long intergenic non-protein coding RNA 2756
NYC_19236	chr11	91525266	91525766	501	*	33.6525	-2.12996	0.685582	-3.10679	0.00189129	0.0176431	Distal Intergenic	11	91794319	91812280	17962	1	105369428	ENST00000655162.1	-268553	NA	LINC02756	long intergenic non-protein coding RNA 2756
NYC_19238	chr11	91528093	91528593	501	*	27.7001	-1.92463	0.6289	-3.06031	0.00221109	0.0193486	Distal Intergenic	11	91794319	91812280	17962	1	105369428	ENST00000655162.1	-265726	NA	LINC02756	long intergenic non-protein coding RNA 2756
NYC_19239	chr11	91530843	91531343	501	*	40.5195	-2.14317	0.655534	-3.26934	0.00107797	0.0127456	Distal Intergenic	11	91794319	91812280	17962	1	105369428	ENST00000655162.1	-262976	NA	LINC02756	long intergenic non-protein coding RNA 2756
NYC_19240	chr11	91534127	91534627	501	*	53.5881	-1.62001	0.516319	-3.13761	0.0017033	0.0165584	Distal Intergenic	11	91794319	91812280	17962	1	105369428	ENST00000655162.1	-259692	NA	LINC02756	long intergenic non-protein coding RNA 2756
NYC_19241	chr11	91539472	91539972	501	*	45.1913	-1.49551	0.553453	-2.70215	0.00688928	0.0414134	Distal Intergenic	11	91794319	91812280	17962	1	105369428	ENST00000655162.1	-254347	NA	LINC02756	long intergenic non-protein coding RNA 2756
NYC_19242	chr11	91540436	91540936	501	*	46.3969	-1.55037	0.522814	-2.96542	0.00302266	0.0235401	Distal Intergenic	11	91794319	91812280	17962	1	105369428	ENST00000655162.1	-253383	NA	LINC02756	long intergenic non-protein coding RNA 2756
NYC_19243	chr11	91543509	91544009	501	*	46.0929	-1.92398	0.610514	-3.1514	0.00162489	0.0161001	Distal Intergenic	11	91794319	91812280	17962	1	105369428	ENST00000655162.1	-250310	NA	LINC02756	long intergenic non-protein coding RNA 2756
NYC_19244	chr11	91551060	91551560	501	*	43.8692	-2.03121	0.554407	-3.66376	0.000248543	0.00641193	Distal Intergenic	11	91794319	91812280	17962	1	105369428	ENST00000655162.1	-242759	NA	LINC02756	long intergenic non-protein coding RNA 2756
NYC_19245	chr11	91566856	91567356	501	*	22.2817	-2.53526	0.832634	-3.04487	0.0023278	0.0200067	Distal Intergenic	11	91794319	91812280	17962	1	105369428	ENST00000655162.1	-226963	NA	LINC02756	long intergenic non-protein coding RNA 2756
NYC_19246	chr11	91567444	91567944	501	*	23.9184	-2.44706	0.862379	-2.83757	0.00454577	0.0308478	Distal Intergenic	11	91794319	91812280	17962	1	105369428	ENST00000655162.1	-226375	NA	LINC02756	long intergenic non-protein coding RNA 2756
NYC_19247	chr11	91568042	91568542	501	*	32.3753	-2.00304	0.697444	-2.87198	0.00407913	0.0286837	Distal Intergenic	11	91794319	91812280	17962	1	105369428	ENST00000655162.1	-225777	NA	LINC02756	long intergenic non-protein coding RNA 2756
NYC_19248	chr11	91572962	91573462	501	*	42.4499	-1.98277	0.705629	-2.80993	0.00495529	0.0327321	Distal Intergenic	11	91794319	91812280	17962	1	105369428	ENST00000655162.1	-220857	NA	LINC02756	long intergenic non-protein coding RNA 2756
NYC_19249	chr11	91574995	91575495	501	*	45.2625	-2.19758	0.704026	-3.12145	0.00179965	0.0171608	Distal Intergenic	11	91794319	91812280	17962	1	105369428	ENST00000655162.1	-218824	NA	LINC02756	long intergenic non-protein coding RNA 2756
NYC_19250	chr11	91582748	91583248	501	*	48.9092	-1.92544	0.689368	-2.79305	0.00522138	0.0339691	Distal Intergenic	11	91794319	91812280	17962	1	105369428	ENST00000655162.1	-211071	NA	LINC02756	long intergenic non-protein coding RNA 2756
NYC_19251	chr11	91583681	91584181	501	*	52.383	-1.58506	0.582223	-2.72242	0.00648051	0.0396423	Distal Intergenic	11	91794319	91812280	17962	1	105369428	ENST00000655162.1	-210138	NA	LINC02756	long intergenic non-protein coding RNA 2756
NYC_19253	chr11	91587446	91587946	501	*	44.0758	-1.36936	0.5178	-2.64457	0.0081795	0.047079	Distal Intergenic	11	91794319	91812280	17962	1	105369428	ENST00000655162.1	-206373	NA	LINC02756	long intergenic non-protein coding RNA 2756
NYC_19255	chr11	91592706	91593206	501	*	54.3218	-1.5443	0.563481	-2.74065	0.00613183	0.0380675	Distal Intergenic	11	91794319	91812280	17962	1	105369428	ENST00000655162.1	-201113	NA	LINC02756	long intergenic non-protein coding RNA 2756
NYC_19256	chr11	91593349	91593849	501	*	41.3749	-2.48222	0.821531	-3.02145	0.00251564	0.0210296	Distal Intergenic	11	91794319	91812280	17962	1	105369428	ENST00000655162.1	-200470	NA	LINC02756	long intergenic non-protein coding RNA 2756
NYC_19257	chr11	91594689	91595189	501	*	49.8384	-2.04055	0.556014	-3.66997	0.000242583	0.00633903	Distal Intergenic	11	91794319	91812280	17962	1	105369428	ENST00000655162.1	-199130	NA	LINC02756	long intergenic non-protein coding RNA 2756
NYC_19258	chr11	91596022	91596522	501	*	49.6351	-1.52147	0.483725	-3.14531	0.00165908	0.0162756	Distal Intergenic	11	91794319	91812280	17962	1	105369428	ENST00000655162.1	-197797	NA	LINC02756	long intergenic non-protein coding RNA 2756
NYC_19259	chr11	91597622	91598122	501	*	40.1251	-1.61093	0.600933	-2.68071	0.00734654	0.0435027	Distal Intergenic	11	91794319	91812280	17962	1	105369428	ENST00000655162.1	-196197	NA	LINC02756	long intergenic non-protein coding RNA 2756
NYC_19260	chr11	91598241	91598741	501	*	37.638	-2.13529	0.543382	-3.92963	8.51e-05	0.00409218	Distal Intergenic	11	91794319	91812280	17962	1	105369428	ENST00000655162.1	-195578	NA	LINC02756	long intergenic non-protein coding RNA 2756
NYC_19261	chr11	91598954	91599454	501	*	46.7676	-1.80642	0.592733	-3.04761	0.00230666	0.01988	Distal Intergenic	11	91794319	91812280	17962	1	105369428	ENST00000655162.1	-194865	NA	LINC02756	long intergenic non-protein coding RNA 2756
NYC_19262	chr11	91600311	91600811	501	*	48.2409	-1.78224	0.597381	-2.98343	0.00285038	0.0227088	Distal Intergenic	11	91794319	91812280	17962	1	105369428	ENST00000655162.1	-193508	NA	LINC02756	long intergenic non-protein coding RNA 2756
NYC_19263	chr11	91600857	91601357	501	*	43.0851	-1.67051	0.555321	-3.00818	0.00262815	0.0215703	Distal Intergenic	11	91794319	91812280	17962	1	105369428	ENST00000655162.1	-192962	NA	LINC02756	long intergenic non-protein coding RNA 2756
NYC_19264	chr11	91601584	91602084	501	*	37.7199	-1.55885	0.539323	-2.89038	0.00384774	0.0275714	Distal Intergenic	11	91794319	91812280	17962	1	105369428	ENST00000655162.1	-192235	NA	LINC02756	long intergenic non-protein coding RNA 2756
NYC_19267	chr11	91607656	91608156	501	*	49.6517	-1.87586	0.549597	-3.41315	0.000642161	0.00980013	Distal Intergenic	11	91794319	91812280	17962	1	105369428	ENST00000655162.1	-186163	NA	LINC02756	long intergenic non-protein coding RNA 2756
NYC_19268	chr11	91609150	91609650	501	*	39.5654	-2.0302	0.570278	-3.56001	0.000370834	0.0076235	Distal Intergenic	11	91794319	91812280	17962	1	105369428	ENST00000655162.1	-184669	NA	LINC02756	long intergenic non-protein coding RNA 2756
NYC_19269	chr11	91614385	91614885	501	*	48.4968	-2.01971	0.547443	-3.68935	0.000224831	0.00613641	Distal Intergenic	11	91794319	91812280	17962	1	105369428	ENST00000655162.1	-179434	NA	LINC02756	long intergenic non-protein coding RNA 2756
NYC_19270	chr11	91624138	91624638	501	*	51.5078	-1.69068	0.509903	-3.31568	0.000914195	0.0117403	Distal Intergenic	11	91794319	91812280	17962	1	105369428	ENST00000655162.1	-169681	NA	LINC02756	long intergenic non-protein coding RNA 2756
NYC_19272	chr11	91631013	91631513	501	*	44.7478	-1.77152	0.611577	-2.89663	0.00377189	0.027204	Distal Intergenic	11	91794319	91812280	17962	1	105369428	ENST00000655162.1	-162806	NA	LINC02756	long intergenic non-protein coding RNA 2756
NYC_19274	chr11	91635423	91635923	501	*	43.8315	-2.17709	0.56384	-3.86119	0.000112838	0.00457907	Distal Intergenic	11	91794319	91812280	17962	1	105369428	ENST00000655162.1	-158396	NA	LINC02756	long intergenic non-protein coding RNA 2756
NYC_19275	chr11	91636854	91637354	501	*	47.7948	-1.93899	0.59762	-3.24452	0.00117648	0.0134228	Distal Intergenic	11	91794319	91812280	17962	1	105369428	ENST00000655162.1	-156965	NA	LINC02756	long intergenic non-protein coding RNA 2756
NYC_19276	chr11	91637898	91638398	501	*	39.8707	-2.11245	0.701615	-3.01084	0.0026053	0.0214552	Distal Intergenic	11	91794319	91812280	17962	1	105369428	ENST00000655162.1	-155921	NA	LINC02756	long intergenic non-protein coding RNA 2756
NYC_19278	chr11	91640398	91640898	501	*	47.391	-1.45004	0.502646	-2.88482	0.00391639	0.027915	Distal Intergenic	11	91794319	91812280	17962	1	105369428	ENST00000655162.1	-153421	NA	LINC02756	long intergenic non-protein coding RNA 2756
NYC_19279	chr11	91644935	91645435	501	*	48.7286	-1.66398	0.566867	-2.93539	0.00333129	0.0250573	Distal Intergenic	11	91794319	91812280	17962	1	105369428	ENST00000655162.1	-148884	NA	LINC02756	long intergenic non-protein coding RNA 2756
NYC_19280	chr11	91645919	91646419	501	*	38.1419	-1.84513	0.668184	-2.76141	0.0057553	0.0363847	Distal Intergenic	11	91794319	91812280	17962	1	105369428	ENST00000655162.1	-147900	NA	LINC02756	long intergenic non-protein coding RNA 2756
NYC_19281	chr11	91652751	91653251	501	*	65.7037	-1.1158	0.385114	-2.89733	0.00376357	0.027158	Distal Intergenic	11	91794319	91812280	17962	1	105369428	ENST00000655162.1	-141068	NA	LINC02756	long intergenic non-protein coding RNA 2756
NYC_19282	chr11	91659313	91659813	501	*	41.5391	-1.96201	0.606299	-3.23603	0.00121203	0.0136419	Distal Intergenic	11	91794319	91812280	17962	1	105369428	ENST00000655162.1	-134506	NA	LINC02756	long intergenic non-protein coding RNA 2756
NYC_19283	chr11	91664008	91664508	501	*	39.9737	-1.84937	0.653043	-2.83193	0.00462685	0.031171	Distal Intergenic	11	91794319	91812280	17962	1	105369428	ENST00000655162.1	-129811	NA	LINC02756	long intergenic non-protein coding RNA 2756
NYC_19284	chr11	91666074	91666574	501	*	44.5025	-1.75876	0.575669	-3.05515	0.00224947	0.0195697	Distal Intergenic	11	91794319	91812280	17962	1	105369428	ENST00000655162.1	-127745	NA	LINC02756	long intergenic non-protein coding RNA 2756
NYC_19285	chr11	91666643	91667143	501	*	52.0754	-1.3296	0.41927	-3.17121	0.00151804	0.0155182	Distal Intergenic	11	91794319	91812280	17962	1	105369428	ENST00000655162.1	-127176	NA	LINC02756	long intergenic non-protein coding RNA 2756
NYC_19286	chr11	91667593	91668093	501	*	56.2175	-1.90592	0.504258	-3.77964	0.000157052	0.00523679	Distal Intergenic	11	91794319	91812280	17962	1	105369428	ENST00000655162.1	-126226	NA	LINC02756	long intergenic non-protein coding RNA 2756
NYC_19288	chr11	91672876	91673376	501	*	37.8209	-2.06247	0.668291	-3.08619	0.00202739	0.018391	Distal Intergenic	11	91794319	91812280	17962	1	105369428	ENST00000655162.1	-120943	NA	LINC02756	long intergenic non-protein coding RNA 2756
NYC_19289	chr11	91676528	91677028	501	*	53.4096	-1.5463	0.478631	-3.23067	0.00123499	0.0137749	Distal Intergenic	11	91794319	91812280	17962	1	105369428	ENST00000655162.1	-117291	NA	LINC02756	long intergenic non-protein coding RNA 2756
NYC_19290	chr11	91678607	91679107	501	*	43.0424	-2.19331	0.588015	-3.73002	0.000191464	0.00569473	Distal Intergenic	11	91794319	91812280	17962	1	105369428	ENST00000655162.1	-115212	NA	LINC02756	long intergenic non-protein coding RNA 2756
NYC_19291	chr11	91685289	91685789	501	*	38.8073	-2.2584	0.556751	-4.0564	4.98e-05	0.00334351	Distal Intergenic	11	91794319	91812280	17962	1	105369428	ENST00000655162.1	-108530	NA	LINC02756	long intergenic non-protein coding RNA 2756
NYC_19292	chr11	91686349	91686849	501	*	36.503	-1.92156	0.599771	-3.20383	0.00135615	0.0145337	Distal Intergenic	11	91794319	91812280	17962	1	105369428	ENST00000655162.1	-107470	NA	LINC02756	long intergenic non-protein coding RNA 2756
NYC_19294	chr11	91688697	91689197	501	*	25.6678	-2.69355	0.671143	-4.01338	5.99e-05	0.0035912	Distal Intergenic	11	91794319	91812280	17962	1	105369428	ENST00000655162.1	-105122	NA	LINC02756	long intergenic non-protein coding RNA 2756
NYC_19295	chr11	91689224	91689724	501	*	37.1983	-2.01579	0.574532	-3.50858	0.000450511	0.0083003	Distal Intergenic	11	91794319	91812280	17962	1	105369428	ENST00000655162.1	-104595	NA	LINC02756	long intergenic non-protein coding RNA 2756
NYC_19296	chr11	91691789	91692289	501	*	60.6118	-1.37799	0.327525	-4.20727	2.58e-05	0.00263263	Distal Intergenic	11	91794319	91812280	17962	1	105369428	ENST00000655162.1	-102030	NA	LINC02756	long intergenic non-protein coding RNA 2756
NYC_19298	chr11	91699649	91700149	501	*	40.8112	-2.01859	0.724888	-2.78469	0.00535786	0.0346313	Distal Intergenic	11	91794319	91812280	17962	1	105369428	ENST00000655162.1	-94170	NA	LINC02756	long intergenic non-protein coding RNA 2756
NYC_19299	chr11	91701599	91702099	501	*	40.1006	-1.63748	0.528168	-3.10031	0.00193321	0.0178736	Distal Intergenic	11	91794319	91812280	17962	1	105369428	ENST00000655162.1	-92220	NA	LINC02756	long intergenic non-protein coding RNA 2756
NYC_19301	chr11	91706185	91706685	501	*	46.3031	-1.67424	0.46268	-3.61858	0.000296222	0.00690449	Distal Intergenic	11	91794319	91812280	17962	1	105369428	ENST00000655162.1	-87634	NA	LINC02756	long intergenic non-protein coding RNA 2756
NYC_19303	chr11	91709326	91709826	501	*	43.5105	-2.0602	0.602505	-3.41939	0.000627617	0.00969463	Distal Intergenic	11	91794319	91812280	17962	1	105369428	ENST00000655162.1	-84493	NA	LINC02756	long intergenic non-protein coding RNA 2756
NYC_19304	chr11	91718485	91718985	501	*	36.8803	-1.6973	0.594158	-2.85665	0.00428134	0.0296213	Distal Intergenic	11	91794319	91812280	17962	1	105369428	ENST00000655162.1	-75334	NA	LINC02756	long intergenic non-protein coding RNA 2756
NYC_19306	chr11	91721313	91721813	501	*	38.7764	-2.33167	0.63667	-3.66229	0.000249972	0.00642358	Distal Intergenic	11	91794319	91812280	17962	1	105369428	ENST00000655162.1	-72506	NA	LINC02756	long intergenic non-protein coding RNA 2756
NYC_19307	chr11	91721863	91722363	501	*	27.6442	-2.11844	0.646496	-3.2768	0.00104992	0.0126068	Distal Intergenic	11	91794319	91812280	17962	1	105369428	ENST00000655162.1	-71956	NA	LINC02756	long intergenic non-protein coding RNA 2756
NYC_19309	chr11	91733118	91733618	501	*	43.9597	-2.44435	0.824637	-2.96415	0.00303517	0.0235982	Distal Intergenic	11	91794319	91812280	17962	1	105369428	ENST00000655162.1	-60701	NA	LINC02756	long intergenic non-protein coding RNA 2756
NYC_19310	chr11	91736215	91736715	501	*	41.1765	-2.2476	0.675116	-3.32921	0.00087094	0.0114724	Distal Intergenic	11	91794319	91812280	17962	1	105369428	ENST00000655162.1	-57604	NA	LINC02756	long intergenic non-protein coding RNA 2756
NYC_19311	chr11	91738621	91739121	501	*	48.1051	-1.63224	0.531713	-3.06978	0.00214218	0.0189911	Distal Intergenic	11	91794319	91812280	17962	1	105369428	ENST00000655162.1	-55198	NA	LINC02756	long intergenic non-protein coding RNA 2756
NYC_19315	chr11	91751524	91752024	501	*	55.0191	-1.62098	0.570463	-2.84153	0.00448983	0.0306168	Distal Intergenic	11	91794319	91812280	17962	1	105369428	ENST00000655162.1	-42295	NA	LINC02756	long intergenic non-protein coding RNA 2756
NYC_19316	chr11	91753015	91753515	501	*	48.3706	-2.05993	0.599982	-3.43333	0.000596221	0.00943909	Distal Intergenic	11	91794319	91812280	17962	1	105369428	ENST00000655162.1	-40804	NA	LINC02756	long intergenic non-protein coding RNA 2756
NYC_19317	chr11	91754816	91755316	501	*	42.046	-1.83012	0.557726	-3.2814	0.00103293	0.0125039	Distal Intergenic	11	91794319	91812280	17962	1	105369428	ENST00000655162.1	-39003	NA	LINC02756	long intergenic non-protein coding RNA 2756
NYC_19318	chr11	91755692	91756192	501	*	54.373	-1.5029	0.547766	-2.74368	0.0060754	0.0378347	Distal Intergenic	11	91794319	91812280	17962	1	105369428	ENST00000655162.1	-38127	NA	LINC02756	long intergenic non-protein coding RNA 2756
NYC_19319	chr11	91757285	91757785	501	*	33.4091	-1.87452	0.71418	-2.62472	0.00867194	0.0491595	Distal Intergenic	11	91794319	91812280	17962	1	105369428	ENST00000655162.1	-36534	NA	LINC02756	long intergenic non-protein coding RNA 2756
NYC_19320	chr11	91758065	91758565	501	*	39.8495	-2.09398	0.584663	-3.58152	0.000341596	0.00734154	Distal Intergenic	11	91794319	91812280	17962	1	105369428	ENST00000655162.1	-35754	NA	LINC02756	long intergenic non-protein coding RNA 2756
NYC_19322	chr11	91761515	91762015	501	*	41.4493	-1.97055	0.71124	-2.77059	0.00559553	0.0357012	Distal Intergenic	11	91794319	91812280	17962	1	105369428	ENST00000655162.1	-32304	NA	LINC02756	long intergenic non-protein coding RNA 2756
NYC_19323	chr11	91762568	91763068	501	*	43.2347	-2.44183	0.741385	-3.2936	0.000989127	0.0122473	Distal Intergenic	11	91794319	91812280	17962	1	105369428	ENST00000655162.1	-31251	NA	LINC02756	long intergenic non-protein coding RNA 2756
NYC_19324	chr11	91764193	91764693	501	*	40.8986	-2.46916	0.559204	-4.41549	1.01e-05	0.00195374	Distal Intergenic	11	91794319	91812280	17962	1	105369428	ENST00000655162.1	-29626	NA	LINC02756	long intergenic non-protein coding RNA 2756
NYC_19325	chr11	91774220	91774720	501	*	46.9896	-1.92927	0.56686	-3.40343	0.000665456	0.00997175	Distal Intergenic	11	91794319	91812280	17962	1	105369428	ENST00000655162.1	-19599	NA	LINC02756	long intergenic non-protein coding RNA 2756
NYC_19326	chr11	91775808	91776308	501	*	44.933	-2.08697	0.523441	-3.98703	6.69e-05	0.00374701	Distal Intergenic	11	91794319	91812280	17962	1	105369428	ENST00000655162.1	-18011	NA	LINC02756	long intergenic non-protein coding RNA 2756
NYC_19327	chr11	91777214	91777714	501	*	44.7751	-2.31159	0.682659	-3.38616	0.000708782	0.0102703	Distal Intergenic	11	91794319	91812280	17962	1	105369428	ENST00000655162.1	-16605	NA	LINC02756	long intergenic non-protein coding RNA 2756
NYC_19330	chr11	91783131	91783631	501	*	33.4797	-1.7255	0.624748	-2.76191	0.00574646	0.0363448	Distal Intergenic	11	91794319	91812280	17962	1	105369428	ENST00000655162.1	-10688	NA	LINC02756	long intergenic non-protein coding RNA 2756
NYC_19331	chr11	91784778	91785278	501	*	39.0822	-2.02211	0.599889	-3.37081	0.000749463	0.0105729	Distal Intergenic	11	91794319	91812280	17962	1	105369428	ENST00000655162.1	-9041	NA	LINC02756	long intergenic non-protein coding RNA 2756
NYC_19332	chr11	91787017	91787517	501	*	45.5929	-2.2526	0.621125	-3.62665	0.00028712	0.00680682	Distal Intergenic	11	91794319	91812280	17962	1	105369428	ENST00000655162.1	-6802	NA	LINC02756	long intergenic non-protein coding RNA 2756
NYC_19333	chr11	91788113	91788613	501	*	46.4627	-1.97662	0.693816	-2.84892	0.00438682	0.030108	Distal Intergenic	11	91794319	91812280	17962	1	105369428	ENST00000655162.1	-5706	NA	LINC02756	long intergenic non-protein coding RNA 2756
NYC_19334	chr11	91789379	91789879	501	*	52.7823	-1.56931	0.538627	-2.91353	0.00357362	0.0262297	Distal Intergenic	11	91794319	91812280	17962	1	105369428	ENST00000655162.1	-4440	NA	LINC02756	long intergenic non-protein coding RNA 2756
NYC_19335	chr11	91790814	91791314	501	*	45.0938	-1.9314	0.539143	-3.58236	0.000340507	0.00733486	Distal Intergenic	11	91794319	91812280	17962	1	105369428	ENST00000655162.1	-3005	NA	LINC02756	long intergenic non-protein coding RNA 2756
NYC_19337	chr11	91793736	91794236	501	*	41.453	-1.9431	0.563243	-3.44985	0.000560906	0.0091601	Promoter (<=1kb)	11	91794319	91812280	17962	1	105369428	ENST00000655162.1	-83	NA	LINC02756	long intergenic non-protein coding RNA 2756
NYC_19338	chr11	91796038	91796538	501	*	47.7071	-1.76774	0.622347	-2.84044	0.00450518	0.0306785	Promoter (<=1kb)	11	91795307	91803492	8186	1	105369428	ENST00000581290.1	731	NA	LINC02756	long intergenic non-protein coding RNA 2756
NYC_19339	chr11	91798374	91798874	501	*	75.6628	-1.43803	0.387063	-3.71522	0.000203027	0.00583108	Intron (ENST00000655162.1/105369428, intron 3 of 3)	11	91795307	91803492	8186	1	105369428	ENST00000581290.1	3067	NA	LINC02756	long intergenic non-protein coding RNA 2756
NYC_19342	chr11	91801500	91802000	501	*	35.6144	-1.67059	0.589206	-2.83532	0.00457794	0.0309522	Intron (ENST00000655162.1/105369428, intron 3 of 3)	11	91795307	91803492	8186	1	105369428	ENST00000581290.1	6193	NA	LINC02756	long intergenic non-protein coding RNA 2756
NYC_19343	chr11	91802009	91802509	501	*	32.6338	-1.71384	0.636155	-2.69406	0.00705873	0.0422413	Intron (ENST00000655162.1/105369428, intron 3 of 3)	11	91795307	91803492	8186	1	105369428	ENST00000581290.1	6702	NA	LINC02756	long intergenic non-protein coding RNA 2756
NYC_19345	chr11	91813612	91814112	501	*	32.2018	-1.94847	0.68425	-2.84759	0.00440514	0.0301934	Intron (ENST00000671523.1/105369428, intron 3 of 11)	11	91795307	91803492	8186	1	105369428	ENST00000581290.1	18305	NA	LINC02756	long intergenic non-protein coding RNA 2756
NYC_19346	chr11	91820620	91821120	501	*	45.9503	-1.73456	0.596502	-2.90789	0.00363878	0.0265349	Intron (ENST00000671523.1/105369428, intron 3 of 11)	11	91795307	91803492	8186	1	105369428	ENST00000581290.1	25313	NA	LINC02756	long intergenic non-protein coding RNA 2756
NYC_19347	chr11	91822751	91823251	501	*	43.9002	-1.59154	0.58503	-2.72045	0.00651935	0.0398146	Intron (ENST00000671523.1/105369428, intron 3 of 11)	11	91795307	91803492	8186	1	105369428	ENST00000581290.1	27444	NA	LINC02756	long intergenic non-protein coding RNA 2756
NYC_19348	chr11	91825674	91826174	501	*	49.5303	-1.19627	0.44929	-2.66259	0.00775428	0.0452743	Intron (ENST00000671523.1/105369428, intron 3 of 11)	11	91795307	91803492	8186	1	105369428	ENST00000581290.1	30367	NA	LINC02756	long intergenic non-protein coding RNA 2756
NYC_19349	chr11	91830811	91831311	501	*	39.1709	-1.7189	0.571645	-3.00694	0.00263892	0.021627	Intron (ENST00000671523.1/105369428, intron 3 of 11)	11	91795307	91803492	8186	1	105369428	ENST00000581290.1	35504	NA	LINC02756	long intergenic non-protein coding RNA 2756
NYC_19351	chr11	91831879	91832379	501	*	35.9259	-2.3051	0.632751	-3.64298	0.000269501	0.00662744	Intron (ENST00000671523.1/105369428, intron 3 of 11)	11	91795307	91803492	8186	1	105369428	ENST00000581290.1	36572	NA	LINC02756	long intergenic non-protein coding RNA 2756
NYC_19353	chr11	91838054	91838554	501	*	50.929	-1.75886	0.551914	-3.18684	0.00143837	0.0150899	Intron (ENST00000671523.1/105369428, intron 3 of 11)	11	91795307	91803492	8186	1	105369428	ENST00000581290.1	42747	NA	LINC02756	long intergenic non-protein coding RNA 2756
NYC_19354	chr11	91840485	91840985	501	*	55.7505	-1.93477	0.517965	-3.73534	0.000187462	0.00564172	Intron (ENST00000671523.1/105369428, intron 4 of 11)	11	91795307	91803492	8186	1	105369428	ENST00000581290.1	45178	NA	LINC02756	long intergenic non-protein coding RNA 2756
NYC_19355	chr11	91843641	91844141	501	*	53.6157	-1.42204	0.453567	-3.13523	0.00171717	0.0166604	Intron (ENST00000671523.1/105369428, intron 6 of 11)	11	91795307	91803492	8186	1	105369428	ENST00000581290.1	48334	NA	LINC02756	long intergenic non-protein coding RNA 2756
NYC_19356	chr11	91846205	91846705	501	*	48.5588	-1.72734	0.417537	-4.13697	3.52e-05	0.00294401	Intron (ENST00000671523.1/105369428, intron 7 of 11)	11	91795307	91803492	8186	1	105369428	ENST00000581290.1	50898	NA	LINC02756	long intergenic non-protein coding RNA 2756
NYC_19357	chr11	91847308	91847808	501	*	41.1595	-2.38706	0.54291	-4.39679	1.1e-05	0.00197586	Intron (ENST00000671523.1/105369428, intron 7 of 11)	11	91795307	91803492	8186	1	105369428	ENST00000581290.1	52001	NA	LINC02756	long intergenic non-protein coding RNA 2756
NYC_19358	chr11	91848221	91848721	501	*	41.4102	-1.88837	0.571227	-3.30582	0.000946991	0.0119776	Intron (ENST00000671523.1/105369428, intron 7 of 11)	11	91795307	91803492	8186	1	105369428	ENST00000581290.1	52914	NA	LINC02756	long intergenic non-protein coding RNA 2756
NYC_19359	chr11	91849018	91849518	501	*	45.1552	-1.69805	0.48574	-3.4958	0.000472643	0.00843557	Intron (ENST00000671523.1/105369428, intron 7 of 11)	11	91795307	91803492	8186	1	105369428	ENST00000581290.1	53711	NA	LINC02756	long intergenic non-protein coding RNA 2756
NYC_19360	chr11	91852231	91852731	501	*	48.6469	-1.67761	0.58424	-2.87145	0.00408597	0.0287065	Intron (ENST00000671523.1/105369428, intron 8 of 11)	11	91795307	91803492	8186	1	105369428	ENST00000581290.1	56924	NA	LINC02756	long intergenic non-protein coding RNA 2756
NYC_19361	chr11	91854545	91855045	501	*	49.9913	-1.95233	0.588741	-3.31611	0.000912807	0.0117333	Intron (ENST00000671523.1/105369428, intron 8 of 11)	11	91795307	91803492	8186	1	105369428	ENST00000581290.1	59238	NA	LINC02756	long intergenic non-protein coding RNA 2756
NYC_19364	chr11	91860916	91861416	501	*	61.0223	-1.1664	0.437885	-2.66372	0.00772828	0.0451866	Intron (ENST00000671523.1/105369428, intron 10 of 11)	11	91795307	91803492	8186	1	105369428	ENST00000581290.1	65609	NA	LINC02756	long intergenic non-protein coding RNA 2756
NYC_19365	chr11	91862257	91862757	501	*	48.9265	-1.81013	0.601893	-3.0074	0.00263494	0.0216071	Exon (ENST00000671523.1/105369428, exon 11 of 12)	11	91795307	91803492	8186	1	105369428	ENST00000581290.1	66950	NA	LINC02756	long intergenic non-protein coding RNA 2756
NYC_19366	chr11	91863858	91864358	501	*	44.5152	-2.05787	0.639104	-3.21993	0.00128221	0.0140915	Intron (ENST00000671523.1/105369428, intron 11 of 11)	11	91795307	91803492	8186	1	105369428	ENST00000581290.1	68551	NA	LINC02756	long intergenic non-protein coding RNA 2756
NYC_19367	chr11	91866105	91866605	501	*	66.0435	-1.1921	0.355761	-3.35086	0.000805624	0.0110094	Intron (ENST00000671523.1/105369428, intron 11 of 11)	11	91795307	91803492	8186	1	105369428	ENST00000581290.1	70798	NA	LINC02756	long intergenic non-protein coding RNA 2756
NYC_19371	chr11	91870010	91870510	501	*	47.6018	-1.8279	0.618049	-2.95753	0.00310116	0.0239514	Intron (ENST00000671523.1/105369428, intron 11 of 11)	11	91795307	91803492	8186	1	105369428	ENST00000581290.1	74703	NA	LINC02756	long intergenic non-protein coding RNA 2756
NYC_19372	chr11	91871321	91871821	501	*	55.0613	-1.66549	0.429784	-3.87517	0.000106549	0.00448638	Intron (ENST00000671523.1/105369428, intron 11 of 11)	11	91795307	91803492	8186	1	105369428	ENST00000581290.1	76014	NA	LINC02756	long intergenic non-protein coding RNA 2756
NYC_19373	chr11	91872681	91873181	501	*	50.902	-1.46142	0.489633	-2.98473	0.00283826	0.0226369	Distal Intergenic	11	91795307	91803492	8186	1	105369428	ENST00000581290.1	77374	NA	LINC02756	long intergenic non-protein coding RNA 2756
NYC_19374	chr11	91876934	91877434	501	*	57.6724	-1.52796	0.508435	-3.00521	0.00265394	0.0216991	Distal Intergenic	11	91795307	91803492	8186	1	105369428	ENST00000581290.1	81627	NA	LINC02756	long intergenic non-protein coding RNA 2756
NYC_19375	chr11	91878165	91878665	501	*	55.9973	-1.73854	0.558287	-3.11406	0.00184533	0.0174244	Distal Intergenic	11	91795307	91803492	8186	1	105369428	ENST00000581290.1	82858	NA	LINC02756	long intergenic non-protein coding RNA 2756
NYC_19376	chr11	91888047	91888547	501	*	46.1372	-1.7784	0.567679	-3.13275	0.00173176	0.0167535	Distal Intergenic	11	91795307	91803492	8186	1	105369428	ENST00000581290.1	92740	NA	LINC02756	long intergenic non-protein coding RNA 2756
NYC_19377	chr11	91889660	91890160	501	*	38.7444	-2.2905	0.622218	-3.68119	0.000232152	0.00622668	Distal Intergenic	11	91795307	91803492	8186	1	105369428	ENST00000581290.1	94353	NA	LINC02756	long intergenic non-protein coding RNA 2756
NYC_19378	chr11	91890353	91890853	501	*	40.062	-2.25066	0.597266	-3.76828	0.00016438	0.00531561	Distal Intergenic	11	91795307	91803492	8186	1	105369428	ENST00000581290.1	95046	NA	LINC02756	long intergenic non-protein coding RNA 2756
NYC_19379	chr11	91891476	91891976	501	*	45.9212	-1.85182	0.687555	-2.69334	0.0070741	0.0422971	Distal Intergenic	11	91795307	91803492	8186	1	105369428	ENST00000581290.1	96169	NA	LINC02756	long intergenic non-protein coding RNA 2756
NYC_19380	chr11	91899938	91900438	501	*	36.9188	-2.06313	0.638716	-3.23012	0.0012374	0.0137869	Distal Intergenic	11	91795307	91803492	8186	1	105369428	ENST00000581290.1	104631	NA	LINC02756	long intergenic non-protein coding RNA 2756
NYC_19381	chr11	91900732	91901232	501	*	40.7231	-2.32266	0.59111	-3.92931	8.52e-05	0.00409218	Distal Intergenic	11	91795307	91803492	8186	1	105369428	ENST00000581290.1	105425	NA	LINC02756	long intergenic non-protein coding RNA 2756
NYC_19382	chr11	91904255	91904755	501	*	36.2392	-2.75884	0.704854	-3.91406	9.08e-05	0.00417975	Distal Intergenic	11	91795307	91803492	8186	1	105369428	ENST00000581290.1	108948	NA	LINC02756	long intergenic non-protein coding RNA 2756
NYC_19383	chr11	91905436	91905936	501	*	43.8663	-2.1412	0.531088	-4.03173	5.54e-05	0.00347089	Distal Intergenic	11	91795307	91803492	8186	1	105369428	ENST00000581290.1	110129	NA	LINC02756	long intergenic non-protein coding RNA 2756
NYC_19384	chr11	91907818	91908318	501	*	39.7006	-1.77342	0.551137	-3.21775	0.001292	0.0141312	Distal Intergenic	11	91795307	91803492	8186	1	105369428	ENST00000581290.1	112511	NA	LINC02756	long intergenic non-protein coding RNA 2756
NYC_19385	chr11	91908394	91908894	501	*	40.6221	-1.63904	0.588539	-2.78494	0.00535377	0.0346089	Distal Intergenic	11	91795307	91803492	8186	1	105369428	ENST00000581290.1	113087	NA	LINC02756	long intergenic non-protein coding RNA 2756
NYC_19386	chr11	91915238	91915738	501	*	56.1868	-1.83192	0.577449	-3.17243	0.00151168	0.0154771	Distal Intergenic	11	91795307	91803492	8186	1	105369428	ENST00000581290.1	119931	NA	LINC02756	long intergenic non-protein coding RNA 2756
NYC_19388	chr11	91923081	91923581	501	*	54.2754	-1.15659	0.421178	-2.74608	0.0060313	0.0376271	Distal Intergenic	11	91795307	91803492	8186	1	105369428	ENST00000581290.1	127774	NA	LINC02756	long intergenic non-protein coding RNA 2756
NYC_19389	chr11	91924963	91925463	501	*	42.3946	-1.90574	0.498629	-3.82196	0.000132394	0.00485405	Distal Intergenic	11	91795307	91803492	8186	1	105369428	ENST00000581290.1	129656	NA	LINC02756	long intergenic non-protein coding RNA 2756
NYC_19390	chr11	91925680	91926180	501	*	42.9044	-1.76719	0.552375	-3.19926	0.00137781	0.0146888	Distal Intergenic	11	91795307	91803492	8186	1	105369428	ENST00000581290.1	130373	NA	LINC02756	long intergenic non-protein coding RNA 2756
NYC_19391	chr11	91927216	91927716	501	*	41.299	-1.603	0.52651	-3.04457	0.0023301	0.0200211	Distal Intergenic	11	91795307	91803492	8186	1	105369428	ENST00000581290.1	131909	NA	LINC02756	long intergenic non-protein coding RNA 2756
NYC_19393	chr11	91929919	91930419	501	*	40.2689	-2.08998	0.727506	-2.8728	0.00406856	0.0286168	Distal Intergenic	11	91795307	91803492	8186	1	105369428	ENST00000581290.1	134612	NA	LINC02756	long intergenic non-protein coding RNA 2756
NYC_19394	chr11	91932061	91932561	501	*	57.9996	-1.4999	0.529432	-2.83304	0.00461075	0.031085	Distal Intergenic	11	91795307	91803492	8186	1	105369428	ENST00000581290.1	136754	NA	LINC02756	long intergenic non-protein coding RNA 2756
NYC_19395	chr11	91934708	91935208	501	*	47.7958	-1.72189	0.512029	-3.36287	0.000771364	0.0107268	Distal Intergenic	11	91795307	91803492	8186	1	105369428	ENST00000581290.1	139401	NA	LINC02756	long intergenic non-protein coding RNA 2756
NYC_19396	chr11	91938844	91939344	501	*	42.0837	-2.01771	0.705627	-2.85946	0.00424369	0.0294593	Distal Intergenic	11	91795307	91803492	8186	1	105369428	ENST00000581290.1	143537	NA	LINC02756	long intergenic non-protein coding RNA 2756
NYC_19397	chr11	91940935	91941435	501	*	45.2417	-1.59664	0.554763	-2.87806	0.00400131	0.0282966	Distal Intergenic	11	91795307	91803492	8186	1	105369428	ENST00000581290.1	145628	NA	LINC02756	long intergenic non-protein coding RNA 2756
NYC_19398	chr11	91941841	91942341	501	*	47.3453	-2.10708	0.543374	-3.87777	0.000105417	0.00447374	Distal Intergenic	11	91795307	91803492	8186	1	105369428	ENST00000581290.1	146534	NA	LINC02756	long intergenic non-protein coding RNA 2756
NYC_19399	chr11	91943002	91943502	501	*	54.6177	-1.75529	0.621943	-2.82226	0.00476862	0.0318156	Distal Intergenic	11	91795307	91803492	8186	1	105369428	ENST00000581290.1	147695	NA	LINC02756	long intergenic non-protein coding RNA 2756
NYC_19400	chr11	91943980	91944480	501	*	54.52	-1.61368	0.560526	-2.87886	0.00399116	0.0282499	Distal Intergenic	11	91795307	91803492	8186	1	105369428	ENST00000581290.1	148673	NA	LINC02756	long intergenic non-protein coding RNA 2756
NYC_19401	chr11	91945298	91945798	501	*	33.0903	-2.06421	0.742353	-2.78063	0.00542535	0.0349222	Distal Intergenic	11	91795307	91803492	8186	1	105369428	ENST00000581290.1	149991	NA	LINC02756	long intergenic non-protein coding RNA 2756
NYC_19403	chr11	91947762	91948262	501	*	40.9526	-1.77703	0.516838	-3.43827	0.000585449	0.00935329	Distal Intergenic	11	91795307	91803492	8186	1	105369428	ENST00000581290.1	152455	NA	LINC02756	long intergenic non-protein coding RNA 2756
NYC_19404	chr11	91949628	91950128	501	*	49.041	-1.93281	0.506923	-3.81283	0.000137386	0.00493716	Exon (ENST00000527023.1/ENST00000527023.1, exon 1 of 1)	11	91795307	91803492	8186	1	105369428	ENST00000581290.1	154321	NA	LINC02756	long intergenic non-protein coding RNA 2756
NYC_19405	chr11	91950761	91951261	501	*	41.8895	-1.92031	0.577278	-3.32649	0.000879468	0.0115277	Distal Intergenic	11	91795307	91803492	8186	1	105369428	ENST00000581290.1	155454	NA	LINC02756	long intergenic non-protein coding RNA 2756
NYC_19407	chr11	91956761	91957261	501	*	48.052	-2.03999	0.558879	-3.65015	0.000262083	0.00655335	Distal Intergenic	11	91795307	91803492	8186	1	105369428	ENST00000581290.1	161454	NA	LINC02756	long intergenic non-protein coding RNA 2756
NYC_19408	chr11	91959675	91960175	501	*	46.5433	-1.76615	0.610791	-2.89158	0.00383311	0.0275126	Distal Intergenic	11	91795307	91803492	8186	1	105369428	ENST00000581290.1	164368	NA	LINC02756	long intergenic non-protein coding RNA 2756
NYC_19409	chr11	91963725	91964225	501	*	40.1183	-2.25967	0.682907	-3.3089	0.000936627	0.0118976	Distal Intergenic	11	91795307	91803492	8186	1	105369428	ENST00000581290.1	168418	NA	LINC02756	long intergenic non-protein coding RNA 2756
NYC_19410	chr11	91965155	91965655	501	*	39.4106	-1.99212	0.614261	-3.24312	0.00118229	0.0134675	Distal Intergenic	11	91795307	91803492	8186	1	105369428	ENST00000581290.1	169848	NA	LINC02756	long intergenic non-protein coding RNA 2756
NYC_19411	chr11	91969781	91970281	501	*	38.3187	-1.93167	0.571471	-3.38017	0.000724398	0.0103716	Distal Intergenic	11	91795307	91803492	8186	1	105369428	ENST00000581290.1	174474	NA	LINC02756	long intergenic non-protein coding RNA 2756
NYC_19413	chr11	91971057	91971557	501	*	34.0242	-1.72246	0.574918	-2.99601	0.00273535	0.0221254	Distal Intergenic	11	91795307	91803492	8186	1	105369428	ENST00000581290.1	175750	NA	LINC02756	long intergenic non-protein coding RNA 2756
NYC_19414	chr11	91971753	91972253	501	*	44.8666	-1.70749	0.581289	-2.93741	0.00330963	0.0249456	Distal Intergenic	11	91795307	91803492	8186	1	105369428	ENST00000581290.1	176446	NA	LINC02756	long intergenic non-protein coding RNA 2756
NYC_19415	chr11	91973625	91974125	501	*	45.5165	-2.21888	0.595681	-3.72495	0.000195358	0.00572227	Distal Intergenic	11	91795307	91803492	8186	1	105369428	ENST00000581290.1	178318	NA	LINC02756	long intergenic non-protein coding RNA 2756
NYC_19416	chr11	91975692	91976192	501	*	49.9355	-1.70857	0.525042	-3.25416	0.00113729	0.0131719	Distal Intergenic	11	91795307	91803492	8186	1	105369428	ENST00000581290.1	180385	NA	LINC02756	long intergenic non-protein coding RNA 2756
NYC_19417	chr11	91976474	91976974	501	*	41.485	-1.61715	0.506121	-3.19518	0.00139743	0.0148114	Distal Intergenic	11	91795307	91803492	8186	1	105369428	ENST00000581290.1	181167	NA	LINC02756	long intergenic non-protein coding RNA 2756
NYC_19418	chr11	91977075	91977575	501	*	34.4135	-2.1975	0.553763	-3.96831	7.24e-05	0.00386882	Distal Intergenic	11	91795307	91803492	8186	1	105369428	ENST00000581290.1	181768	NA	LINC02756	long intergenic non-protein coding RNA 2756
NYC_19420	chr11	91980019	91980519	501	*	43.9562	-1.88897	0.539934	-3.49851	0.000467864	0.00839941	Distal Intergenic	11	91795307	91803492	8186	1	105369428	ENST00000581290.1	184712	NA	LINC02756	long intergenic non-protein coding RNA 2756
NYC_19421	chr11	91980828	91981328	501	*	42.2665	-1.3136	0.501154	-2.62115	0.00876343	0.0495275	Distal Intergenic	11	91795307	91803492	8186	1	105369428	ENST00000581290.1	185521	NA	LINC02756	long intergenic non-protein coding RNA 2756
NYC_19423	chr11	91983630	91984130	501	*	39.0424	-1.72365	0.578741	-2.97828	0.00289873	0.0229341	Distal Intergenic	11	91795307	91803492	8186	1	105369428	ENST00000581290.1	188323	NA	LINC02756	long intergenic non-protein coding RNA 2756
NYC_19424	chr11	91984417	91984917	501	*	35.9258	-1.80915	0.681632	-2.65415	0.00795088	0.0461049	Distal Intergenic	11	91795307	91803492	8186	1	105369428	ENST00000581290.1	189110	NA	LINC02756	long intergenic non-protein coding RNA 2756
NYC_19426	chr11	91986879	91987379	501	*	51.802	-1.35772	0.503143	-2.69847	0.00696586	0.0417885	Distal Intergenic	11	91795307	91803492	8186	1	105369428	ENST00000581290.1	191572	NA	LINC02756	long intergenic non-protein coding RNA 2756
NYC_19427	chr11	91989299	91989799	501	*	47.1339	-1.80214	0.617734	-2.91735	0.0035302	0.0260386	Distal Intergenic	11	91795307	91803492	8186	1	105369428	ENST00000581290.1	193992	NA	LINC02756	long intergenic non-protein coding RNA 2756
NYC_19428	chr11	91991317	91991817	501	*	60.2957	-1.76698	0.429715	-4.11199	3.92e-05	0.00305285	Distal Intergenic	11	91795307	91803492	8186	1	105369428	ENST00000581290.1	196010	NA	LINC02756	long intergenic non-protein coding RNA 2756
NYC_19429	chr11	91994143	91994643	501	*	42.5691	-1.8974	0.671472	-2.82574	0.00471719	0.0315655	Distal Intergenic	11	91795307	91803492	8186	1	105369428	ENST00000581290.1	198836	NA	LINC02756	long intergenic non-protein coding RNA 2756
NYC_19431	chr11	92001733	92002233	501	*	47.4094	-1.54682	0.579281	-2.67025	0.00757954	0.0445428	Distal Intergenic	11	91795307	91803492	8186	1	105369428	ENST00000581290.1	206426	NA	LINC02756	long intergenic non-protein coding RNA 2756
NYC_19432	chr11	92004044	92004544	501	*	43.468	-1.96649	0.652011	-3.01604	0.00256102	0.021247	Distal Intergenic	11	91795307	91803492	8186	1	105369428	ENST00000581290.1	208737	NA	LINC02756	long intergenic non-protein coding RNA 2756
NYC_19434	chr11	92009878	92010378	501	*	46.6978	-1.54415	0.459163	-3.36296	0.000771119	0.010726	Distal Intergenic	11	92224818	92896473	671656	1	120114	ENST00000525166.6	-214440	ENSG00000165323	FAT3	FAT atypical cadherin 3
NYC_19435	chr11	92014632	92015132	501	*	40.2583	-1.94185	0.591794	-3.28129	0.00103332	0.0125039	Distal Intergenic	11	92224818	92896473	671656	1	120114	ENST00000525166.6	-209686	ENSG00000165323	FAT3	FAT atypical cadherin 3
NYC_19436	chr11	92015283	92015783	501	*	37.8974	-1.62514	0.561795	-2.89277	0.00381866	0.0274423	Distal Intergenic	11	92224818	92896473	671656	1	120114	ENST00000525166.6	-209035	ENSG00000165323	FAT3	FAT atypical cadherin 3
NYC_19437	chr11	92017925	92018425	501	*	44.7731	-1.67384	0.592356	-2.82573	0.00471735	0.0315655	Distal Intergenic	11	92224818	92896473	671656	1	120114	ENST00000525166.6	-206393	ENSG00000165323	FAT3	FAT atypical cadherin 3
NYC_19438	chr11	92018557	92019057	501	*	40.4561	-2.09074	0.547073	-3.82168	0.000132546	0.00485405	Distal Intergenic	11	92224818	92896473	671656	1	120114	ENST00000525166.6	-205761	ENSG00000165323	FAT3	FAT atypical cadherin 3
NYC_19439	chr11	92021745	92022245	501	*	44.1016	-2.17586	0.631337	-3.44643	0.000568053	0.00922831	Distal Intergenic	11	92224818	92896473	671656	1	120114	ENST00000525166.6	-202573	ENSG00000165323	FAT3	FAT atypical cadherin 3
NYC_19440	chr11	92023448	92023948	501	*	39.469	-1.68104	0.622275	-2.70145	0.00690384	0.0414921	Distal Intergenic	11	92224818	92896473	671656	1	120114	ENST00000525166.6	-200870	ENSG00000165323	FAT3	FAT atypical cadherin 3
NYC_19441	chr11	92025622	92026122	501	*	34.5898	-1.98979	0.681146	-2.92125	0.00348635	0.0258378	Distal Intergenic	11	92224818	92896473	671656	1	120114	ENST00000525166.6	-198696	ENSG00000165323	FAT3	FAT atypical cadherin 3
NYC_19442	chr11	92027007	92027507	501	*	52.8429	-1.93107	0.675887	-2.8571	0.00427538	0.0295994	Distal Intergenic	11	92224818	92896473	671656	1	120114	ENST00000525166.6	-197311	ENSG00000165323	FAT3	FAT atypical cadherin 3
NYC_19443	chr11	92033653	92034153	501	*	49.7553	-2.08736	0.538675	-3.87499	0.000106631	0.00448644	Distal Intergenic	11	92224818	92896473	671656	1	120114	ENST00000525166.6	-190665	ENSG00000165323	FAT3	FAT atypical cadherin 3
NYC_19446	chr11	92037632	92038132	501	*	52.9786	-1.85912	0.63583	-2.92393	0.00345638	0.0256804	Distal Intergenic	11	92224818	92896473	671656	1	120114	ENST00000525166.6	-186686	ENSG00000165323	FAT3	FAT atypical cadherin 3
NYC_19447	chr11	92039260	92039760	501	*	51.2344	-2.10832	0.597379	-3.52928	0.000416691	0.0079928	Distal Intergenic	11	92224818	92896473	671656	1	120114	ENST00000525166.6	-185058	ENSG00000165323	FAT3	FAT atypical cadherin 3
NYC_19448	chr11	92041069	92041569	501	*	41.2498	-2.12066	0.713932	-2.97039	0.00297422	0.0233057	Distal Intergenic	11	92224818	92896473	671656	1	120114	ENST00000525166.6	-183249	ENSG00000165323	FAT3	FAT atypical cadherin 3
NYC_19449	chr11	92041831	92042331	501	*	36.1117	-2.11495	0.702162	-3.01206	0.00259484	0.0214195	Distal Intergenic	11	92224818	92896473	671656	1	120114	ENST00000525166.6	-182487	ENSG00000165323	FAT3	FAT atypical cadherin 3
NYC_19452	chr11	92046430	92046930	501	*	44.6671	-1.4787	0.490078	-3.01727	0.00255059	0.0211887	Distal Intergenic	11	92224818	92896473	671656	1	120114	ENST00000525166.6	-177888	ENSG00000165323	FAT3	FAT atypical cadherin 3
NYC_19454	chr11	92050092	92050592	501	*	49.3153	-1.42958	0.50004	-2.85893	0.00425069	0.0294859	Distal Intergenic	11	92224818	92896473	671656	1	120114	ENST00000525166.6	-174226	ENSG00000165323	FAT3	FAT atypical cadherin 3
NYC_19455	chr11	92051986	92052486	501	*	39.9704	-2.16415	0.703892	-3.07454	0.00210825	0.0188047	Distal Intergenic	11	92224818	92896473	671656	1	120114	ENST00000525166.6	-172332	ENSG00000165323	FAT3	FAT atypical cadherin 3
NYC_19456	chr11	92053776	92054276	501	*	33.0487	-1.95283	0.556879	-3.50673	0.000453642	0.00832286	Distal Intergenic	11	92224818	92896473	671656	1	120114	ENST00000525166.6	-170542	ENSG00000165323	FAT3	FAT atypical cadherin 3
NYC_19457	chr11	92054379	92054879	501	*	39.5314	-1.433	0.516056	-2.77684	0.0054891	0.0352258	Distal Intergenic	11	92224818	92896473	671656	1	120114	ENST00000525166.6	-169939	ENSG00000165323	FAT3	FAT atypical cadherin 3
NYC_19458	chr11	92054924	92055424	501	*	40.1203	-1.8086	0.527598	-3.42799	0.000608072	0.00953493	Distal Intergenic	11	92224818	92896473	671656	1	120114	ENST00000525166.6	-169394	ENSG00000165323	FAT3	FAT atypical cadherin 3
NYC_19459	chr11	92059039	92059539	501	*	42.6985	-2.21302	0.63851	-3.46592	0.000528425	0.0088866	Distal Intergenic	11	92224818	92896473	671656	1	120114	ENST00000525166.6	-165279	ENSG00000165323	FAT3	FAT atypical cadherin 3
NYC_19461	chr11	92063049	92063549	501	*	51.3025	-1.82238	0.504651	-3.61117	0.00030482	0.00698731	Distal Intergenic	11	92224818	92896473	671656	1	120114	ENST00000525166.6	-161269	ENSG00000165323	FAT3	FAT atypical cadherin 3
NYC_19462	chr11	92065844	92066344	501	*	37.7752	-2.03767	0.743959	-2.73896	0.00616343	0.0382127	Distal Intergenic	11	92224818	92896473	671656	1	120114	ENST00000525166.6	-158474	ENSG00000165323	FAT3	FAT atypical cadherin 3
NYC_19463	chr11	92066697	92067197	501	*	50.9053	-1.85123	0.630558	-2.93587	0.00332616	0.0250321	Distal Intergenic	11	92224818	92896473	671656	1	120114	ENST00000525166.6	-157621	ENSG00000165323	FAT3	FAT atypical cadherin 3
NYC_19465	chr11	92070757	92071257	501	*	31.7007	-2.33457	0.655719	-3.56033	0.000370394	0.00762006	Distal Intergenic	11	92224818	92896473	671656	1	120114	ENST00000525166.6	-153561	ENSG00000165323	FAT3	FAT atypical cadherin 3
NYC_19466	chr11	92072994	92073494	501	*	51.0231	-1.76091	0.553061	-3.18394	0.00145286	0.0151927	Distal Intergenic	11	92224818	92896473	671656	1	120114	ENST00000525166.6	-151324	ENSG00000165323	FAT3	FAT atypical cadherin 3
NYC_19467	chr11	92082581	92083081	501	*	51.9738	-1.29454	0.45147	-2.8674	0.0041386	0.0289562	Distal Intergenic	11	92224818	92896473	671656	1	120114	ENST00000525166.6	-141737	ENSG00000165323	FAT3	FAT atypical cadherin 3
NYC_19468	chr11	92088578	92089078	501	*	51.6885	-1.7535	0.548268	-3.19825	0.00138266	0.0147093	Distal Intergenic	11	92224818	92896473	671656	1	120114	ENST00000525166.6	-135740	ENSG00000165323	FAT3	FAT atypical cadherin 3
NYC_19469	chr11	92090399	92090899	501	*	47.2908	-2.18002	0.603155	-3.61437	0.000301078	0.00694007	Distal Intergenic	11	92224818	92896473	671656	1	120114	ENST00000525166.6	-133919	ENSG00000165323	FAT3	FAT atypical cadherin 3
NYC_19470	chr11	92097252	92097752	501	*	42.9798	-2.09541	0.595301	-3.51991	0.000431694	0.00813311	Distal Intergenic	11	92224818	92896473	671656	1	120114	ENST00000525166.6	-127066	ENSG00000165323	FAT3	FAT atypical cadherin 3
NYC_19471	chr11	92104444	92104944	501	*	54.4617	-1.63955	0.511368	-3.2062	0.00134499	0.0144659	Distal Intergenic	11	92224818	92896473	671656	1	120114	ENST00000525166.6	-119874	ENSG00000165323	FAT3	FAT atypical cadherin 3
NYC_19473	chr11	92108139	92108639	501	*	49.7359	-1.687	0.54519	-3.09433	0.00197258	0.0180693	Distal Intergenic	11	92224818	92896473	671656	1	120114	ENST00000525166.6	-116179	ENSG00000165323	FAT3	FAT atypical cadherin 3
NYC_19475	chr11	92112057	92112557	501	*	59.7021	-1.73749	0.549968	-3.15926	0.00158169	0.0158431	Distal Intergenic	11	92224818	92896473	671656	1	120114	ENST00000525166.6	-112261	ENSG00000165323	FAT3	FAT atypical cadherin 3
NYC_19476	chr11	92118328	92118828	501	*	43.1592	-2.11593	0.570936	-3.70608	0.000210492	0.00592679	Distal Intergenic	11	92224818	92896473	671656	1	120114	ENST00000525166.6	-105990	ENSG00000165323	FAT3	FAT atypical cadherin 3
NYC_19481	chr11	92124726	92125226	501	*	42.487	-1.70037	0.457372	-3.7177	0.000201042	0.00580278	Distal Intergenic	11	92224818	92896473	671656	1	120114	ENST00000525166.6	-99592	ENSG00000165323	FAT3	FAT atypical cadherin 3
NYC_19482	chr11	92125502	92126002	501	*	49.3747	-1.22129	0.438657	-2.78415	0.00536681	0.0346611	Distal Intergenic	11	92224818	92896473	671656	1	120114	ENST00000525166.6	-98816	ENSG00000165323	FAT3	FAT atypical cadherin 3
NYC_19484	chr11	92126765	92127265	501	*	32.2461	-1.98267	0.717578	-2.76301	0.00572715	0.0362802	Distal Intergenic	11	92224818	92896473	671656	1	120114	ENST00000525166.6	-97553	ENSG00000165323	FAT3	FAT atypical cadherin 3
NYC_19485	chr11	92128895	92129395	501	*	46.0234	-1.47739	0.53653	-2.75361	0.00589418	0.036978	Distal Intergenic	11	92224818	92896473	671656	1	120114	ENST00000525166.6	-95423	ENSG00000165323	FAT3	FAT atypical cadherin 3
NYC_19488	chr11	92132429	92132929	501	*	37.0126	-1.87244	0.564416	-3.31748	0.000908338	0.0117031	Distal Intergenic	11	92224818	92896473	671656	1	120114	ENST00000525166.6	-91889	ENSG00000165323	FAT3	FAT atypical cadherin 3
NYC_19489	chr11	92132984	92133484	501	*	37.5836	-1.66089	0.535863	-3.09947	0.00193864	0.0179031	Distal Intergenic	11	92224818	92896473	671656	1	120114	ENST00000525166.6	-91334	ENSG00000165323	FAT3	FAT atypical cadherin 3
NYC_19490	chr11	92133818	92134318	501	*	46.002	-1.71302	0.49653	-3.44998	0.000560627	0.00915821	Distal Intergenic	11	92224818	92896473	671656	1	120114	ENST00000525166.6	-90500	ENSG00000165323	FAT3	FAT atypical cadherin 3
NYC_19492	chr11	92136007	92136507	501	*	41.0745	-2.44373	0.642276	-3.8048	0.000141916	0.00502248	Distal Intergenic	11	92224818	92896473	671656	1	120114	ENST00000525166.6	-88311	ENSG00000165323	FAT3	FAT atypical cadherin 3
NYC_19495	chr11	92137811	92138311	501	*	50.7162	-1.75625	0.623959	-2.81468	0.00488258	0.0323636	Distal Intergenic	11	92224818	92896473	671656	1	120114	ENST00000525166.6	-86507	ENSG00000165323	FAT3	FAT atypical cadherin 3
NYC_19496	chr11	92140325	92140825	501	*	46.5796	-1.37866	0.522214	-2.64003	0.00828977	0.047523	Distal Intergenic	11	92224818	92896473	671656	1	120114	ENST00000525166.6	-83993	ENSG00000165323	FAT3	FAT atypical cadherin 3
NYC_19498	chr11	92143784	92144284	501	*	41.3908	-2.22961	0.712154	-3.1308	0.0017433	0.0168451	Distal Intergenic	11	92224818	92896473	671656	1	120114	ENST00000525166.6	-80534	ENSG00000165323	FAT3	FAT atypical cadherin 3
NYC_19500	chr11	92148655	92149155	501	*	43.4652	-1.80226	0.539074	-3.34325	0.000828028	0.0111434	Distal Intergenic	11	92224818	92896473	671656	1	120114	ENST00000525166.6	-75663	ENSG00000165323	FAT3	FAT atypical cadherin 3
NYC_19501	chr11	92149239	92149739	501	*	34.6874	-1.87294	0.680353	-2.75289	0.00590714	0.0370285	Distal Intergenic	11	92224818	92896473	671656	1	120114	ENST00000525166.6	-75079	ENSG00000165323	FAT3	FAT atypical cadherin 3
NYC_19502	chr11	92150676	92151176	501	*	37.4858	-1.82731	0.667574	-2.73724	0.00619571	0.0383533	Distal Intergenic	11	92224818	92896473	671656	1	120114	ENST00000525166.6	-73642	ENSG00000165323	FAT3	FAT atypical cadherin 3
NYC_19504	chr11	92152194	92152694	501	*	54.8765	-1.24756	0.428229	-2.91331	0.00357623	0.0262297	Distal Intergenic	11	92224818	92896473	671656	1	120114	ENST00000525166.6	-72124	ENSG00000165323	FAT3	FAT atypical cadherin 3
NYC_19505	chr11	92154742	92155242	501	*	51.0782	-1.58088	0.55537	-2.84653	0.00441984	0.0302613	Distal Intergenic	11	92224818	92896473	671656	1	120114	ENST00000525166.6	-69576	ENSG00000165323	FAT3	FAT atypical cadherin 3
NYC_19506	chr11	92155894	92156394	501	*	52.3969	-1.52704	0.495011	-3.08486	0.00203645	0.0184317	Distal Intergenic	11	92224818	92896473	671656	1	120114	ENST00000525166.6	-68424	ENSG00000165323	FAT3	FAT atypical cadherin 3
NYC_19507	chr11	92160105	92160605	501	*	44.1729	-1.62956	0.569516	-2.86131	0.00421891	0.0293419	Distal Intergenic	11	92224818	92896473	671656	1	120114	ENST00000525166.6	-64213	ENSG00000165323	FAT3	FAT atypical cadherin 3
NYC_19508	chr11	92161359	92161859	501	*	52.0522	-1.40929	0.451964	-3.11814	0.00181996	0.0173043	Exon (ENST00000497708.2/ENST00000497708.2, exon 1 of 1)	11	92224818	92896473	671656	1	120114	ENST00000525166.6	-62959	ENSG00000165323	FAT3	FAT atypical cadherin 3
NYC_19509	chr11	92165373	92165873	501	*	54.7467	-1.65972	0.524381	-3.16511	0.00155024	0.0156697	Distal Intergenic	11	92224818	92896473	671656	1	120114	ENST00000525166.6	-58945	ENSG00000165323	FAT3	FAT atypical cadherin 3
NYC_19510	chr11	92166502	92167002	501	*	50.9758	-1.66539	0.539848	-3.08492	0.00203608	0.0184316	Distal Intergenic	11	92224818	92896473	671656	1	120114	ENST00000525166.6	-57816	ENSG00000165323	FAT3	FAT atypical cadherin 3
NYC_19511	chr11	92168868	92169368	501	*	60.6833	-1.18547	0.437147	-2.71183	0.00669129	0.0405957	Distal Intergenic	11	92224818	92896473	671656	1	120114	ENST00000525166.6	-55450	ENSG00000165323	FAT3	FAT atypical cadherin 3
NYC_19512	chr11	92177552	92178052	501	*	37.0629	-2.0962	0.657366	-3.18879	0.00142869	0.0150081	Distal Intergenic	11	92224818	92896473	671656	1	120114	ENST00000525166.6	-46766	ENSG00000165323	FAT3	FAT atypical cadherin 3
NYC_19514	chr11	92181989	92182489	501	*	54.3727	-2.29954	0.556878	-4.12935	3.64e-05	0.00299245	Distal Intergenic	11	92224818	92896473	671656	1	120114	ENST00000525166.6	-42329	ENSG00000165323	FAT3	FAT atypical cadherin 3
NYC_19515	chr11	92188991	92189491	501	*	51.7371	-1.75669	0.51853	-3.38782	0.000704514	0.0102376	Distal Intergenic	11	92224818	92896473	671656	1	120114	ENST00000525166.6	-35327	ENSG00000165323	FAT3	FAT atypical cadherin 3
NYC_19516	chr11	92190520	92191020	501	*	53.5923	-1.61065	0.523417	-3.07718	0.00208971	0.0187006	Distal Intergenic	11	92224818	92896473	671656	1	120114	ENST00000525166.6	-33798	ENSG00000165323	FAT3	FAT atypical cadherin 3
NYC_19517	chr11	92194868	92195368	501	*	41.3963	-2.49518	0.74435	-3.35216	0.000801844	0.0109821	Distal Intergenic	11	92224818	92896473	671656	1	120114	ENST00000525166.6	-29450	ENSG00000165323	FAT3	FAT atypical cadherin 3
NYC_19518	chr11	92196372	92196872	501	*	46.565	-2.168	0.57982	-3.7391	0.000184683	0.00559422	Distal Intergenic	11	92224818	92896473	671656	1	120114	ENST00000525166.6	-27946	ENSG00000165323	FAT3	FAT atypical cadherin 3
NYC_19519	chr11	92198239	92198739	501	*	51.1415	-1.91706	0.579745	-3.30673	0.000943904	0.0119575	Distal Intergenic	11	92224818	92896473	671656	1	120114	ENST00000525166.6	-26079	ENSG00000165323	FAT3	FAT atypical cadherin 3
NYC_19521	chr11	92200566	92201066	501	*	51.6581	-1.69241	0.610959	-2.77009	0.00560403	0.035743	Distal Intergenic	11	92224818	92896473	671656	1	120114	ENST00000525166.6	-23752	ENSG00000165323	FAT3	FAT atypical cadherin 3
NYC_19522	chr11	92205811	92206311	501	*	44.8592	-2.0916	0.59543	-3.51276	0.000443483	0.00823093	Distal Intergenic	11	92224818	92896473	671656	1	120114	ENST00000525166.6	-18507	ENSG00000165323	FAT3	FAT atypical cadherin 3
NYC_19523	chr11	92208429	92208929	501	*	46.3496	-1.87144	0.600575	-3.11608	0.0018327	0.0173589	Distal Intergenic	11	92224818	92896473	671656	1	120114	ENST00000525166.6	-15889	ENSG00000165323	FAT3	FAT atypical cadherin 3
NYC_19524	chr11	92209616	92210116	501	*	39.4901	-2.03472	0.731951	-2.77986	0.00543817	0.0349903	Distal Intergenic	11	92224818	92896473	671656	1	120114	ENST00000525166.6	-14702	ENSG00000165323	FAT3	FAT atypical cadherin 3
NYC_19527	chr11	92217427	92217927	501	*	41.7217	-1.55372	0.586578	-2.64879	0.00807813	0.0466447	Distal Intergenic	11	92224818	92896473	671656	1	120114	ENST00000525166.6	-6891	ENSG00000165323	FAT3	FAT atypical cadherin 3
NYC_19528	chr11	92220694	92221194	501	*	35.9228	-2.01286	0.573701	-3.50855	0.000450564	0.0083003	Distal Intergenic	11	92224818	92896473	671656	1	120114	ENST00000525166.6	-3624	ENSG00000165323	FAT3	FAT atypical cadherin 3
NYC_19529	chr11	92222143	92222643	501	*	49.2501	-1.60161	0.468537	-3.41832	0.000630088	0.00972739	Promoter (2-3kb)	11	92224818	92896473	671656	1	120114	ENST00000525166.6	-2175	ENSG00000165323	FAT3	FAT atypical cadherin 3
NYC_19531	chr11	92223736	92224236	501	*	51.8165	-1.0795	0.409172	-2.63826	0.00833322	0.0476841	Promoter (<=1kb)	11	92224818	92896473	671656	1	120114	ENST00000525166.6	-582	ENSG00000165323	FAT3	FAT atypical cadherin 3
NYC_19535	chr11	92226846	92227346	501	*	46.7737	-1.17416	0.336528	-3.48904	0.00048476	0.00852632	Promoter (2-3kb)	11	92224818	92896473	671656	1	120114	ENST00000525166.6	2028	ENSG00000165323	FAT3	FAT atypical cadherin 3
NYC_19537	chr11	92228441	92228941	501	*	50.081	-1.0644	0.379318	-2.80609	0.00501474	0.0330238	Intron (ENST00000525166.6/120114, intron 1 of 27)	11	92224818	92896473	671656	1	120114	ENST00000525166.6	3623	ENSG00000165323	FAT3	FAT atypical cadherin 3
NYC_19538	chr11	92234344	92234844	501	*	40.1145	-1.87036	0.588507	-3.17814	0.00148224	0.0153571	Intron (ENST00000525166.6/120114, intron 1 of 27)	11	92224818	92896473	671656	1	120114	ENST00000525166.6	9526	ENSG00000165323	FAT3	FAT atypical cadherin 3
NYC_19539	chr11	92235133	92235633	501	*	51.1657	-1.59254	0.440428	-3.61589	0.000299313	0.00692523	Intron (ENST00000525166.6/120114, intron 1 of 27)	11	92224818	92896473	671656	1	120114	ENST00000525166.6	10315	ENSG00000165323	FAT3	FAT atypical cadherin 3
NYC_19540	chr11	92245159	92245659	501	*	47.2685	-1.74053	0.555617	-3.13261	0.00173261	0.0167588	Intron (ENST00000525166.6/120114, intron 1 of 27)	11	92224818	92896473	671656	1	120114	ENST00000525166.6	20341	ENSG00000165323	FAT3	FAT atypical cadherin 3
NYC_19542	chr11	92247655	92248155	501	*	36.1057	-1.99429	0.654132	-3.04876	0.00229786	0.0198409	Intron (ENST00000525166.6/120114, intron 1 of 27)	11	92224818	92896473	671656	1	120114	ENST00000525166.6	22837	ENSG00000165323	FAT3	FAT atypical cadherin 3
NYC_19543	chr11	92252459	92252959	501	*	49.1584	-1.73741	0.595633	-2.91692	0.00353511	0.0260543	Intron (ENST00000525166.6/120114, intron 1 of 27)	11	92224818	92896473	671656	1	120114	ENST00000525166.6	27641	ENSG00000165323	FAT3	FAT atypical cadherin 3
NYC_19544	chr11	92264266	92264766	501	*	47.4122	-1.70268	0.527312	-3.22898	0.00124231	0.0138099	Intron (ENST00000525166.6/120114, intron 1 of 27)	11	92224818	92896473	671656	1	120114	ENST00000525166.6	39448	ENSG00000165323	FAT3	FAT atypical cadherin 3
NYC_19546	chr11	92272049	92272549	501	*	48.3913	-1.91324	0.584174	-3.27512	0.00105616	0.0126244	Intron (ENST00000525166.6/120114, intron 1 of 27)	11	92224818	92896473	671656	1	120114	ENST00000525166.6	47231	ENSG00000165323	FAT3	FAT atypical cadherin 3
NYC_19547	chr11	92275409	92275909	501	*	34.6911	-2.46214	0.686291	-3.58761	0.000333728	0.00727811	Intron (ENST00000525166.6/120114, intron 1 of 27)	11	92224818	92896473	671656	1	120114	ENST00000525166.6	50591	ENSG00000165323	FAT3	FAT atypical cadherin 3
NYC_19548	chr11	92276401	92276901	501	*	57.3026	-1.18847	0.34493	-3.44553	0.000569937	0.00923056	Intron (ENST00000525166.6/120114, intron 1 of 27)	11	92224818	92896473	671656	1	120114	ENST00000525166.6	51583	ENSG00000165323	FAT3	FAT atypical cadherin 3
NYC_19552	chr11	92281762	92282262	501	*	51.3936	-1.65648	0.543023	-3.05047	0.0022848	0.0197594	Intron (ENST00000525166.6/120114, intron 1 of 27)	11	92224818	92896473	671656	1	120114	ENST00000525166.6	56944	ENSG00000165323	FAT3	FAT atypical cadherin 3
NYC_19553	chr11	92282819	92283319	501	*	40.6698	-1.86894	0.656819	-2.84544	0.00443498	0.0303316	Intron (ENST00000525166.6/120114, intron 1 of 27)	11	92224818	92896473	671656	1	120114	ENST00000525166.6	58001	ENSG00000165323	FAT3	FAT atypical cadherin 3
NYC_19554	chr11	92286653	92287153	501	*	54.4407	-1.16324	0.349935	-3.32417	0.000886824	0.0115623	Intron (ENST00000525166.6/120114, intron 1 of 27)	11	92224818	92896473	671656	1	120114	ENST00000525166.6	61835	ENSG00000165323	FAT3	FAT atypical cadherin 3
NYC_19556	chr11	92287884	92288384	501	*	41.8655	-2.14848	0.599563	-3.58341	0.000339137	0.00732963	Intron (ENST00000525166.6/120114, intron 1 of 27)	11	92224818	92896473	671656	1	120114	ENST00000525166.6	63066	ENSG00000165323	FAT3	FAT atypical cadherin 3
NYC_19557	chr11	92289255	92289755	501	*	46.2457	-1.89242	0.662389	-2.85696	0.00427716	0.0296034	Intron (ENST00000525166.6/120114, intron 1 of 27)	11	92352096	92896452	544357	1	120114	ENST00000409404.6	-62341	ENSG00000165323	FAT3	FAT atypical cadherin 3
NYC_19558	chr11	92290810	92291310	501	*	32.6088	-2.03406	0.741444	-2.74338	0.00608098	0.0378414	Intron (ENST00000525166.6/120114, intron 1 of 27)	11	92352096	92896452	544357	1	120114	ENST00000409404.6	-60786	ENSG00000165323	FAT3	FAT atypical cadherin 3
NYC_19559	chr11	92291326	92291826	501	*	37.2729	-1.55946	0.566992	-2.75041	0.00595203	0.0372374	Intron (ENST00000525166.6/120114, intron 1 of 27)	11	92352096	92896452	544357	1	120114	ENST00000409404.6	-60270	ENSG00000165323	FAT3	FAT atypical cadherin 3
NYC_19562	chr11	92299883	92300383	501	*	42.6892	-1.95254	0.599829	-3.25517	0.00113324	0.0131414	Intron (ENST00000525166.6/120114, intron 1 of 27)	11	92352096	92896452	544357	1	120114	ENST00000409404.6	-51713	ENSG00000165323	FAT3	FAT atypical cadherin 3
NYC_19564	chr11	92303922	92304422	501	*	47.4291	-1.63744	0.574673	-2.84933	0.00438108	0.0300844	Intron (ENST00000525166.6/120114, intron 1 of 27)	11	92352096	92896452	544357	1	120114	ENST00000409404.6	-47674	ENSG00000165323	FAT3	FAT atypical cadherin 3
NYC_19566	chr11	92308325	92308825	501	*	43.0868	-1.63963	0.520153	-3.15221	0.00162038	0.0160793	Intron (ENST00000525166.6/120114, intron 1 of 27)	11	92352096	92896452	544357	1	120114	ENST00000409404.6	-43271	ENSG00000165323	FAT3	FAT atypical cadherin 3
NYC_19568	chr11	92310817	92311317	501	*	37.1911	-2.23663	0.704393	-3.17526	0.00149703	0.015432	Intron (ENST00000525166.6/120114, intron 1 of 27)	11	92352096	92896452	544357	1	120114	ENST00000409404.6	-40779	ENSG00000165323	FAT3	FAT atypical cadherin 3
NYC_19570	chr11	92313399	92313899	501	*	39.8912	-2.16094	0.587299	-3.67945	0.000233735	0.00622963	Intron (ENST00000525166.6/120114, intron 1 of 27)	11	92352096	92896452	544357	1	120114	ENST00000409404.6	-38197	ENSG00000165323	FAT3	FAT atypical cadherin 3
NYC_19572	chr11	92316250	92316750	501	*	37.5792	-2.25373	0.65976	-3.41598	0.000635519	0.00976269	Intron (ENST00000525166.6/120114, intron 1 of 27)	11	92352096	92896452	544357	1	120114	ENST00000409404.6	-35346	ENSG00000165323	FAT3	FAT atypical cadherin 3
NYC_19573	chr11	92317909	92318409	501	*	45.1403	-1.7135	0.589096	-2.9087	0.00362935	0.0264799	Intron (ENST00000525166.6/120114, intron 1 of 27)	11	92352096	92896452	544357	1	120114	ENST00000409404.6	-33687	ENSG00000165323	FAT3	FAT atypical cadherin 3
NYC_19575	chr11	92323050	92323550	501	*	48.1374	-1.89097	0.600654	-3.14818	0.00164292	0.0161794	Intron (ENST00000525166.6/120114, intron 1 of 27)	11	92352096	92896452	544357	1	120114	ENST00000409404.6	-28546	ENSG00000165323	FAT3	FAT atypical cadherin 3
NYC_19576	chr11	92324290	92324790	501	*	40.5174	-2.00645	0.68693	-2.9209	0.00349023	0.0258568	Intron (ENST00000525166.6/120114, intron 1 of 27)	11	92352096	92896452	544357	1	120114	ENST00000409404.6	-27306	ENSG00000165323	FAT3	FAT atypical cadherin 3
NYC_19579	chr11	92327936	92328436	501	*	48.1836	-1.79238	0.533565	-3.35926	0.000781517	0.0108115	Intron (ENST00000525166.6/120114, intron 1 of 27)	11	92352096	92896452	544357	1	120114	ENST00000409404.6	-23660	ENSG00000165323	FAT3	FAT atypical cadherin 3
NYC_19580	chr11	92330750	92331250	501	*	40.4019	-2.28565	0.613146	-3.72775	0.000193199	0.00571489	Intron (ENST00000525166.6/120114, intron 1 of 27)	11	92352096	92896452	544357	1	120114	ENST00000409404.6	-20846	ENSG00000165323	FAT3	FAT atypical cadherin 3
NYC_19581	chr11	92331914	92332414	501	*	41.9491	-1.81229	0.532174	-3.40544	0.000660583	0.00995932	Intron (ENST00000525166.6/120114, intron 1 of 27)	11	92352096	92896452	544357	1	120114	ENST00000409404.6	-19682	ENSG00000165323	FAT3	FAT atypical cadherin 3
NYC_19582	chr11	92336213	92336713	501	*	40.9457	-2.14602	0.623424	-3.44232	0.000576757	0.00929411	Exon (ENST00000455818.3/ENST00000455818.3, exon 1 of 1)	11	92352096	92896452	544357	1	120114	ENST00000409404.6	-15383	ENSG00000165323	FAT3	FAT atypical cadherin 3
NYC_19583	chr11	92338602	92339102	501	*	53.7441	-1.93042	0.52463	-3.67958	0.000233618	0.00622963	Intron (ENST00000525166.6/120114, intron 1 of 27)	11	92352096	92896452	544357	1	120114	ENST00000409404.6	-12994	ENSG00000165323	FAT3	FAT atypical cadherin 3
NYC_19584	chr11	92339753	92340253	501	*	41.515	-1.72894	0.582549	-2.96788	0.00299857	0.0234145	Intron (ENST00000525166.6/120114, intron 1 of 27)	11	92352096	92896452	544357	1	120114	ENST00000409404.6	-11843	ENSG00000165323	FAT3	FAT atypical cadherin 3
NYC_19587	chr11	92344597	92345097	501	*	43.6681	-1.80042	0.622422	-2.89261	0.00382057	0.0274489	Intron (ENST00000525166.6/120114, intron 1 of 27)	11	92352096	92896452	544357	1	120114	ENST00000409404.6	-6999	ENSG00000165323	FAT3	FAT atypical cadherin 3
NYC_19588	chr11	92346239	92346739	501	*	44.8373	-1.97918	0.511126	-3.87219	0.000107861	0.00450865	Intron (ENST00000525166.6/120114, intron 1 of 27)	11	92352096	92896452	544357	1	120114	ENST00000409404.6	-5357	ENSG00000165323	FAT3	FAT atypical cadherin 3
NYC_19590	chr11	92349211	92349711	501	*	41.2575	-1.69852	0.547449	-3.1026	0.00191828	0.017794	Promoter (2-3kb)	11	92352096	92896452	544357	1	120114	ENST00000409404.6	-2385	ENSG00000165323	FAT3	FAT atypical cadherin 3
NYC_19591	chr11	92350994	92351494	501	*	39.2137	-2.16173	0.787816	-2.74395	0.00607047	0.0378125	Promoter (<=1kb)	11	92352096	92896452	544357	1	120114	ENST00000409404.6	-602	ENSG00000165323	FAT3	FAT atypical cadherin 3
NYC_19593	chr11	92354107	92354607	501	*	33.7253	-2.11982	0.592985	-3.57482	0.000350465	0.00742872	Promoter (<=1kb)	11	92355186	92524949	169764	1	120114	ENST00000528921.1	-579	ENSG00000165323	FAT3	FAT atypical cadherin 3
NYC_19594	chr11	92355100	92355600	501	*	53.127	-2.18226	0.516767	-4.22291	2.41e-05	0.00257842	Promoter (<=1kb)	11	92355186	92524949	169764	1	120114	ENST00000528921.1	0	ENSG00000165323	FAT3	FAT atypical cadherin 3
NYC_19595	chr11	92356440	92356940	501	*	53.8712	-1.83049	0.463546	-3.94889	7.85e-05	0.00398039	Promoter (1-2kb)	11	92355186	92524949	169764	1	120114	ENST00000528921.1	1254	ENSG00000165323	FAT3	FAT atypical cadherin 3
NYC_19597	chr11	92358453	92358953	501	*	38.4522	-1.65241	0.631144	-2.61811	0.00884175	0.049809	Intron (ENST00000525166.6/120114, intron 2 of 27)	11	92355186	92524949	169764	1	120114	ENST00000528921.1	3267	ENSG00000165323	FAT3	FAT atypical cadherin 3
NYC_19598	chr11	92361530	92362030	501	*	63.5213	-1.83505	0.414262	-4.42969	9.44e-06	0.00192074	Intron (ENST00000525166.6/120114, intron 2 of 27)	11	92355186	92524949	169764	1	120114	ENST00000528921.1	6344	ENSG00000165323	FAT3	FAT atypical cadherin 3
NYC_19599	chr11	92365036	92365536	501	*	33.8754	-2.35005	0.702779	-3.34393	0.000825995	0.0111321	Intron (ENST00000525166.6/120114, intron 2 of 27)	11	92355186	92524949	169764	1	120114	ENST00000528921.1	9850	ENSG00000165323	FAT3	FAT atypical cadherin 3
NYC_19600	chr11	92365635	92366135	501	*	35.3636	-2.03945	0.655736	-3.11017	0.0018698	0.0175425	Intron (ENST00000525166.6/120114, intron 2 of 27)	11	92355186	92524949	169764	1	120114	ENST00000528921.1	10449	ENSG00000165323	FAT3	FAT atypical cadherin 3
NYC_19602	chr11	92366816	92367316	501	*	49.1692	-1.6011	0.493197	-3.24636	0.00116889	0.0133767	Exon (ENST00000503887.1/ENST00000503887.1, exon 1 of 1)	11	92355186	92524949	169764	1	120114	ENST00000528921.1	11630	ENSG00000165323	FAT3	FAT atypical cadherin 3
NYC_19604	chr11	92368655	92369155	501	*	53.5603	-1.46472	0.503452	-2.90936	0.00362166	0.0264342	Intron (ENST00000525166.6/120114, intron 2 of 27)	11	92355186	92524949	169764	1	120114	ENST00000528921.1	13469	ENSG00000165323	FAT3	FAT atypical cadherin 3
NYC_19605	chr11	92371185	92371685	501	*	52.2429	-1.85494	0.511367	-3.62741	0.000286277	0.00680601	Intron (ENST00000525166.6/120114, intron 2 of 27)	11	92355186	92524949	169764	1	120114	ENST00000528921.1	15999	ENSG00000165323	FAT3	FAT atypical cadherin 3
NYC_19608	chr11	92373544	92374044	501	*	41.7885	-1.54743	0.444316	-3.48274	0.000496318	0.00862869	Intron (ENST00000525166.6/120114, intron 2 of 27)	11	92355186	92524949	169764	1	120114	ENST00000528921.1	18358	ENSG00000165323	FAT3	FAT atypical cadherin 3
NYC_19609	chr11	92374955	92375455	501	*	50.7994	-1.86418	0.545861	-3.41511	0.000637555	0.00977547	Intron (ENST00000525166.6/120114, intron 2 of 27)	11	92355186	92524949	169764	1	120114	ENST00000528921.1	19769	ENSG00000165323	FAT3	FAT atypical cadherin 3
NYC_19610	chr11	92376872	92377372	501	*	41.5977	-2.00069	0.640866	-3.12186	0.00179713	0.0171456	Intron (ENST00000525166.6/120114, intron 2 of 27)	11	92355186	92524949	169764	1	120114	ENST00000528921.1	21686	ENSG00000165323	FAT3	FAT atypical cadherin 3
NYC_19611	chr11	92377795	92378295	501	*	40.6956	-2.19463	0.529128	-4.14764	3.36e-05	0.00292247	Intron (ENST00000525166.6/120114, intron 2 of 27)	11	92355186	92524949	169764	1	120114	ENST00000528921.1	22609	ENSG00000165323	FAT3	FAT atypical cadherin 3
NYC_19612	chr11	92378459	92378959	501	*	40.4062	-2.30746	0.616662	-3.74185	0.00018267	0.00556945	Intron (ENST00000525166.6/120114, intron 2 of 27)	11	92355186	92524949	169764	1	120114	ENST00000528921.1	23273	ENSG00000165323	FAT3	FAT atypical cadherin 3
NYC_19613	chr11	92379825	92380325	501	*	60.4773	-1.41336	0.324759	-4.35203	1.35e-05	0.00210476	Intron (ENST00000525166.6/120114, intron 2 of 27)	11	92355186	92524949	169764	1	120114	ENST00000528921.1	24639	ENSG00000165323	FAT3	FAT atypical cadherin 3
NYC_19615	chr11	92382692	92383192	501	*	54.4529	-1.49921	0.496311	-3.0207	0.00252191	0.0210479	Intron (ENST00000525166.6/120114, intron 2 of 27)	11	92355186	92524949	169764	1	120114	ENST00000528921.1	27506	ENSG00000165323	FAT3	FAT atypical cadherin 3
NYC_19618	chr11	92384799	92385299	501	*	52.1207	-1.77019	0.325309	-5.44158	5.28e-08	0.00019687	Intron (ENST00000525166.6/120114, intron 2 of 27)	11	92355186	92524949	169764	1	120114	ENST00000528921.1	29613	ENSG00000165323	FAT3	FAT atypical cadherin 3
NYC_19619	chr11	92386634	92387134	501	*	47.8939	-1.68785	0.6121	-2.75747	0.00582511	0.0367094	Intron (ENST00000525166.6/120114, intron 2 of 27)	11	92355186	92524949	169764	1	120114	ENST00000528921.1	31448	ENSG00000165323	FAT3	FAT atypical cadherin 3
NYC_19620	chr11	92387290	92387790	501	*	46.5462	-1.92709	0.558926	-3.44784	0.000565083	0.00919955	Intron (ENST00000525166.6/120114, intron 2 of 27)	11	92355186	92524949	169764	1	120114	ENST00000528921.1	32104	ENSG00000165323	FAT3	FAT atypical cadherin 3
NYC_19621	chr11	92388091	92388591	501	*	33.5486	-1.81329	0.570809	-3.1767	0.00148961	0.0153935	Intron (ENST00000525166.6/120114, intron 2 of 27)	11	92355186	92524949	169764	1	120114	ENST00000528921.1	32905	ENSG00000165323	FAT3	FAT atypical cadherin 3
NYC_19622	chr11	92389612	92390112	501	*	42.7819	-2.30205	0.590206	-3.90041	9.6e-05	0.0042799	Intron (ENST00000525166.6/120114, intron 2 of 27)	11	92355186	92524949	169764	1	120114	ENST00000528921.1	34426	ENSG00000165323	FAT3	FAT atypical cadherin 3
NYC_19623	chr11	92391052	92391552	501	*	53.5512	-1.41409	0.511717	-2.76342	0.00571988	0.0362546	Intron (ENST00000525166.6/120114, intron 2 of 27)	11	92355186	92524949	169764	1	120114	ENST00000528921.1	35866	ENSG00000165323	FAT3	FAT atypical cadherin 3
NYC_19625	chr11	92392337	92392837	501	*	45.2291	-1.80601	0.527395	-3.4244	0.000616161	0.00960521	Intron (ENST00000525166.6/120114, intron 2 of 27)	11	92355186	92524949	169764	1	120114	ENST00000528921.1	37151	ENSG00000165323	FAT3	FAT atypical cadherin 3
NYC_19626	chr11	92393873	92394373	501	*	48.1685	-1.63372	0.493653	-3.30946	0.00093476	0.0118874	Intron (ENST00000525166.6/120114, intron 2 of 27)	11	92355186	92524949	169764	1	120114	ENST00000528921.1	38687	ENSG00000165323	FAT3	FAT atypical cadherin 3
NYC_19627	chr11	92394778	92395278	501	*	39.2379	-2.40559	0.609544	-3.94654	7.93e-05	0.00400924	Intron (ENST00000525166.6/120114, intron 2 of 27)	11	92355186	92524949	169764	1	120114	ENST00000528921.1	39592	ENSG00000165323	FAT3	FAT atypical cadherin 3
NYC_19628	chr11	92396256	92396756	501	*	51.1163	-1.59881	0.434673	-3.6782	0.000234889	0.00623956	Intron (ENST00000525166.6/120114, intron 2 of 27)	11	92355186	92524949	169764	1	120114	ENST00000528921.1	41070	ENSG00000165323	FAT3	FAT atypical cadherin 3
NYC_19629	chr11	92399748	92400248	501	*	43.8069	-1.9925	0.625584	-3.18502	0.00144743	0.0151622	Exon (ENST00000531176.1/ENST00000531176.1, exon 5 of 5)	11	92355186	92524949	169764	1	120114	ENST00000528921.1	44562	ENSG00000165323	FAT3	FAT atypical cadherin 3
NYC_19630	chr11	92401248	92401748	501	*	47.1861	-2.07689	0.614837	-3.37795	0.000730281	0.0104224	Intron (ENST00000525166.6/120114, intron 2 of 27)	11	92355186	92524949	169764	1	120114	ENST00000528921.1	46062	ENSG00000165323	FAT3	FAT atypical cadherin 3
NYC_19631	chr11	92404018	92404518	501	*	47.9799	-1.75782	0.583312	-3.01352	0.00258237	0.0213576	Intron (ENST00000525166.6/120114, intron 2 of 27)	11	92355186	92524949	169764	1	120114	ENST00000528921.1	48832	ENSG00000165323	FAT3	FAT atypical cadherin 3
NYC_19632	chr11	92405058	92405558	501	*	50.6108	-1.81482	0.582211	-3.11712	0.0018263	0.0173345	Intron (ENST00000525166.6/120114, intron 2 of 27)	11	92355186	92524949	169764	1	120114	ENST00000528921.1	49872	ENSG00000165323	FAT3	FAT atypical cadherin 3
NYC_19633	chr11	92405846	92406346	501	*	28.5983	-2.66099	0.73507	-3.62005	0.000294551	0.00687987	Intron (ENST00000525166.6/120114, intron 2 of 27)	11	92355186	92524949	169764	1	120114	ENST00000528921.1	50660	ENSG00000165323	FAT3	FAT atypical cadherin 3
NYC_19634	chr11	92406453	92406953	501	*	42.0992	-1.44971	0.530046	-2.73507	0.00623664	0.0385427	Exon (ENST00000531176.1/ENST00000531176.1, exon 2 of 5)	11	92355186	92524949	169764	1	120114	ENST00000528921.1	51267	ENSG00000165323	FAT3	FAT atypical cadherin 3
NYC_19636	chr11	92408869	92409369	501	*	37.5756	-2.39976	0.55902	-4.29279	1.76e-05	0.00231073	Intron (ENST00000525166.6/120114, intron 2 of 27)	11	92355186	92524949	169764	1	120114	ENST00000528921.1	53683	ENSG00000165323	FAT3	FAT atypical cadherin 3
NYC_19638	chr11	92412648	92413148	501	*	42.2434	-2.66721	0.550555	-4.84457	1.27e-06	0.000898099	Intron (ENST00000525166.6/120114, intron 2 of 27)	11	92355186	92524949	169764	1	120114	ENST00000528921.1	57462	ENSG00000165323	FAT3	FAT atypical cadherin 3
NYC_19639	chr11	92415112	92415612	501	*	55.6478	-1.60333	0.435893	-3.67827	0.000234819	0.00623956	Intron (ENST00000525166.6/120114, intron 2 of 27)	11	92355186	92524949	169764	1	120114	ENST00000528921.1	59926	ENSG00000165323	FAT3	FAT atypical cadherin 3
NYC_19640	chr11	92416538	92417038	501	*	44.0081	-1.77885	0.609018	-2.92085	0.00349077	0.0258568	Intron (ENST00000525166.6/120114, intron 2 of 27)	11	92355186	92524949	169764	1	120114	ENST00000528921.1	61352	ENSG00000165323	FAT3	FAT atypical cadherin 3
NYC_19643	chr11	92419254	92419754	501	*	42.308	-1.69357	0.559238	-3.02836	0.00245883	0.0207095	Intron (ENST00000525166.6/120114, intron 2 of 27)	11	92355186	92524949	169764	1	120114	ENST00000528921.1	64068	ENSG00000165323	FAT3	FAT atypical cadherin 3
NYC_19645	chr11	92421577	92422077	501	*	51.5396	-2.24844	0.548593	-4.09857	4.16e-05	0.00311138	Intron (ENST00000525166.6/120114, intron 2 of 27)	11	92355186	92524949	169764	1	120114	ENST00000528921.1	66391	ENSG00000165323	FAT3	FAT atypical cadherin 3
NYC_19646	chr11	92422871	92423371	501	*	49.7247	-1.8251	0.479793	-3.80393	0.000142419	0.00502754	Intron (ENST00000525166.6/120114, intron 2 of 27)	11	92355186	92524949	169764	1	120114	ENST00000528921.1	67685	ENSG00000165323	FAT3	FAT atypical cadherin 3
NYC_19647	chr11	92425673	92426173	501	*	37.9517	-2.193	0.678962	-3.22993	0.0012382	0.0137893	Intron (ENST00000525166.6/120114, intron 2 of 27)	11	92355186	92524949	169764	1	120114	ENST00000528921.1	70487	ENSG00000165323	FAT3	FAT atypical cadherin 3
NYC_19648	chr11	92432497	92432997	501	*	50.8804	-1.71063	0.471185	-3.63048	0.00028289	0.0067824	Intron (ENST00000525166.6/120114, intron 2 of 27)	11	92355186	92524949	169764	1	120114	ENST00000528921.1	77311	ENSG00000165323	FAT3	FAT atypical cadherin 3
NYC_19649	chr11	92433149	92433649	501	*	55.0486	-1.67339	0.538486	-3.10758	0.00188625	0.0176165	Intron (ENST00000525166.6/120114, intron 2 of 27)	11	92355186	92524949	169764	1	120114	ENST00000528921.1	77963	ENSG00000165323	FAT3	FAT atypical cadherin 3
NYC_19650	chr11	92434191	92434691	501	*	42.5797	-1.78106	0.619631	-2.87439	0.00404811	0.0285338	Intron (ENST00000525166.6/120114, intron 2 of 27)	11	92355186	92524949	169764	1	120114	ENST00000528921.1	79005	ENSG00000165323	FAT3	FAT atypical cadherin 3
NYC_19651	chr11	92434865	92435365	501	*	35.4087	-1.51621	0.541087	-2.80216	0.00507624	0.0333194	Intron (ENST00000525166.6/120114, intron 2 of 27)	11	92355186	92524949	169764	1	120114	ENST00000528921.1	79679	ENSG00000165323	FAT3	FAT atypical cadherin 3
NYC_19652	chr11	92435395	92435895	501	*	32.7734	-2.04637	0.561228	-3.64623	0.000266111	0.00657955	Intron (ENST00000525166.6/120114, intron 2 of 27)	11	92355186	92524949	169764	1	120114	ENST00000528921.1	80209	ENSG00000165323	FAT3	FAT atypical cadherin 3
NYC_19653	chr11	92437670	92438170	501	*	39.5187	-2.93184	0.541503	-5.41425	6.15e-08	0.000215086	Intron (ENST00000525166.6/120114, intron 2 of 27)	11	92355186	92524949	169764	1	120114	ENST00000528921.1	82484	ENSG00000165323	FAT3	FAT atypical cadherin 3
NYC_19654	chr11	92439853	92440353	501	*	56.9337	-1.53112	0.514699	-2.9748	0.00293184	0.0231031	Intron (ENST00000525166.6/120114, intron 2 of 27)	11	92355186	92524949	169764	1	120114	ENST00000528921.1	84667	ENSG00000165323	FAT3	FAT atypical cadherin 3
NYC_19656	chr11	92444194	92444694	501	*	33.39	-2.14013	0.601296	-3.55919	0.000371996	0.00763615	Intron (ENST00000525166.6/120114, intron 2 of 27)	11	92355186	92524949	169764	1	120114	ENST00000528921.1	89008	ENSG00000165323	FAT3	FAT atypical cadherin 3
NYC_19657	chr11	92445402	92445902	501	*	56.0071	-1.77809	0.512075	-3.47233	0.00051597	0.0087947	Intron (ENST00000525166.6/120114, intron 2 of 27)	11	92355186	92524949	169764	1	120114	ENST00000528921.1	90216	ENSG00000165323	FAT3	FAT atypical cadherin 3
NYC_19659	chr11	92449180	92449680	501	*	51.3006	-1.34463	0.402051	-3.34443	0.000824509	0.0111175	Intron (ENST00000525166.6/120114, intron 2 of 27)	11	92355186	92524949	169764	1	120114	ENST00000528921.1	93994	ENSG00000165323	FAT3	FAT atypical cadherin 3
NYC_19660	chr11	92449856	92450356	501	*	42.4309	-1.87143	0.593309	-3.15423	0.00160921	0.0160025	Intron (ENST00000525166.6/120114, intron 2 of 27)	11	92355186	92524949	169764	1	120114	ENST00000528921.1	94670	ENSG00000165323	FAT3	FAT atypical cadherin 3
NYC_19661	chr11	92451961	92452461	501	*	41.3276	-1.9875	0.728504	-2.72819	0.00636835	0.0391317	Intron (ENST00000525166.6/120114, intron 2 of 27)	11	92355186	92524949	169764	1	120114	ENST00000528921.1	96775	ENSG00000165323	FAT3	FAT atypical cadherin 3
NYC_19663	chr11	92457580	92458080	501	*	49.8453	-1.82228	0.518181	-3.51669	0.000436959	0.00817577	Intron (ENST00000525166.6/120114, intron 2 of 27)	11	92355186	92524949	169764	1	120114	ENST00000528921.1	102394	ENSG00000165323	FAT3	FAT atypical cadherin 3
NYC_19664	chr11	92458895	92459395	501	*	54.1051	-1.60168	0.418388	-3.82822	0.000129072	0.00481847	Intron (ENST00000525166.6/120114, intron 2 of 27)	11	92355186	92524949	169764	1	120114	ENST00000528921.1	103709	ENSG00000165323	FAT3	FAT atypical cadherin 3
NYC_19665	chr11	92459903	92460403	501	*	31.7905	-1.97836	0.66198	-2.98855	0.00280302	0.0224551	Intron (ENST00000525166.6/120114, intron 2 of 27)	11	92355186	92524949	169764	1	120114	ENST00000528921.1	104717	ENSG00000165323	FAT3	FAT atypical cadherin 3
NYC_19666	chr11	92460476	92460976	501	*	31.0584	-1.72553	0.573315	-3.00974	0.00261467	0.0214881	Intron (ENST00000525166.6/120114, intron 2 of 27)	11	92355186	92524949	169764	1	120114	ENST00000528921.1	105290	ENSG00000165323	FAT3	FAT atypical cadherin 3
NYC_19667	chr11	92461007	92461507	501	*	30.2539	-2.24013	0.702298	-3.18972	0.00142411	0.0149815	Intron (ENST00000525166.6/120114, intron 2 of 27)	11	92355186	92524949	169764	1	120114	ENST00000528921.1	105821	ENSG00000165323	FAT3	FAT atypical cadherin 3
NYC_19669	chr11	92467371	92467871	501	*	51.5916	-1.81981	0.563184	-3.23129	0.00123231	0.0137646	Intron (ENST00000525166.6/120114, intron 2 of 27)	11	92355186	92524949	169764	1	120114	ENST00000528921.1	112185	ENSG00000165323	FAT3	FAT atypical cadherin 3
NYC_19670	chr11	92468359	92468859	501	*	50.8684	-1.6636	0.548025	-3.03562	0.00240039	0.0204415	Intron (ENST00000525166.6/120114, intron 2 of 27)	11	92355186	92524949	169764	1	120114	ENST00000528921.1	113173	ENSG00000165323	FAT3	FAT atypical cadherin 3
NYC_19671	chr11	92469824	92470324	501	*	39.6235	-1.98418	0.523644	-3.78919	0.00015114	0.00515322	Intron (ENST00000525166.6/120114, intron 2 of 27)	11	92355186	92524949	169764	1	120114	ENST00000528921.1	114638	ENSG00000165323	FAT3	FAT atypical cadherin 3
NYC_19672	chr11	92472181	92472681	501	*	60.3221	-1.36017	0.383455	-3.54714	0.00038944	0.00778189	Intron (ENST00000525166.6/120114, intron 2 of 27)	11	92355186	92524949	169764	1	120114	ENST00000528921.1	116995	ENSG00000165323	FAT3	FAT atypical cadherin 3
NYC_19675	chr11	92475852	92476352	501	*	40.3937	-1.82966	0.578673	-3.16182	0.00156789	0.0157598	Intron (ENST00000525166.6/120114, intron 2 of 27)	11	92355186	92524949	169764	1	120114	ENST00000528921.1	120666	ENSG00000165323	FAT3	FAT atypical cadherin 3
NYC_19676	chr11	92476530	92477030	501	*	40.7224	-2.0049	0.66868	-2.9983	0.00271489	0.0220299	Intron (ENST00000525166.6/120114, intron 2 of 27)	11	92355186	92524949	169764	1	120114	ENST00000528921.1	121344	ENSG00000165323	FAT3	FAT atypical cadherin 3
NYC_19678	chr11	92482115	92482615	501	*	42.1235	-1.55685	0.560489	-2.77767	0.00547508	0.0351816	Intron (ENST00000525166.6/120114, intron 2 of 27)	11	92355186	92524949	169764	1	120114	ENST00000528921.1	126929	ENSG00000165323	FAT3	FAT atypical cadherin 3
NYC_19679	chr11	92482951	92483451	501	*	44.8475	-1.7564	0.553917	-3.17087	0.00151981	0.0155324	Intron (ENST00000525166.6/120114, intron 2 of 27)	11	92355186	92524949	169764	1	120114	ENST00000528921.1	127765	ENSG00000165323	FAT3	FAT atypical cadherin 3
NYC_19680	chr11	92483751	92484251	501	*	42.8908	-1.99491	0.599337	-3.32853	0.000873064	0.0114842	Intron (ENST00000525166.6/120114, intron 2 of 27)	11	92355186	92524949	169764	1	120114	ENST00000528921.1	128565	ENSG00000165323	FAT3	FAT atypical cadherin 3
NYC_19681	chr11	92484738	92485238	501	*	53.126	-2.16273	0.544115	-3.97476	7.04e-05	0.0038359	Intron (ENST00000525166.6/120114, intron 2 of 27)	11	92355186	92524949	169764	1	120114	ENST00000528921.1	129552	ENSG00000165323	FAT3	FAT atypical cadherin 3
NYC_19682	chr11	92486899	92487399	501	*	41.2019	-1.76955	0.489961	-3.61161	0.0003043	0.00698731	Intron (ENST00000525166.6/120114, intron 2 of 27)	11	92355186	92524949	169764	1	120114	ENST00000528921.1	131713	ENSG00000165323	FAT3	FAT atypical cadherin 3
NYC_19683	chr11	92487624	92488124	501	*	59.5105	-1.77956	0.505868	-3.51783	0.000435093	0.00815865	Intron (ENST00000525166.6/120114, intron 2 of 27)	11	92355186	92524949	169764	1	120114	ENST00000528921.1	132438	ENSG00000165323	FAT3	FAT atypical cadherin 3
NYC_19685	chr11	92494247	92494747	501	*	45.92	-1.72478	0.489121	-3.52628	0.000421438	0.00804475	Intron (ENST00000525166.6/120114, intron 2 of 27)	11	92355186	92524949	169764	1	120114	ENST00000528921.1	139061	ENSG00000165323	FAT3	FAT atypical cadherin 3
NYC_19686	chr11	92496349	92496849	501	*	47.5636	-2.00572	0.519734	-3.85913	0.000113791	0.00458417	Intron (ENST00000525166.6/120114, intron 2 of 27)	11	92355186	92524949	169764	1	120114	ENST00000528921.1	141163	ENSG00000165323	FAT3	FAT atypical cadherin 3
NYC_19687	chr11	92498859	92499359	501	*	31.9588	-2.17625	0.65922	-3.30125	0.000962559	0.0120528	Exon (ENST00000471604.2/ENST00000471604.2, exon 1 of 1)	11	92355186	92524949	169764	1	120114	ENST00000528921.1	143673	ENSG00000165323	FAT3	FAT atypical cadherin 3
NYC_19688	chr11	92499439	92499939	501	*	39.4275	-1.69737	0.550507	-3.08327	0.00204736	0.0184977	Intron (ENST00000525166.6/120114, intron 2 of 27)	11	92355186	92524949	169764	1	120114	ENST00000528921.1	144253	ENSG00000165323	FAT3	FAT atypical cadherin 3
NYC_19690	chr11	92503159	92503659	501	*	29.5346	-2.33919	0.754572	-3.10003	0.00193503	0.0178815	Intron (ENST00000525166.6/120114, intron 2 of 27)	11	92355186	92524949	169764	1	120114	ENST00000528921.1	147973	ENSG00000165323	FAT3	FAT atypical cadherin 3
NYC_19691	chr11	92504052	92504552	501	*	40.4183	-2.24197	0.692992	-3.2352	0.00121557	0.0136681	Intron (ENST00000525166.6/120114, intron 2 of 27)	11	92355186	92524949	169764	1	120114	ENST00000528921.1	148866	ENSG00000165323	FAT3	FAT atypical cadherin 3
NYC_19692	chr11	92504898	92505398	501	*	52.412	-1.3629	0.391094	-3.48484	0.000492433	0.0085887	Intron (ENST00000525166.6/120114, intron 2 of 27)	11	92355186	92524949	169764	1	120114	ENST00000528921.1	149712	ENSG00000165323	FAT3	FAT atypical cadherin 3
NYC_19694	chr11	92506903	92507403	501	*	35.7871	-1.66485	0.458707	-3.62945	0.000284025	0.0067824	Intron (ENST00000525166.6/120114, intron 2 of 27)	11	92355186	92524949	169764	1	120114	ENST00000528921.1	151717	ENSG00000165323	FAT3	FAT atypical cadherin 3
NYC_19695	chr11	92507477	92507977	501	*	52.6249	-1.75073	0.499739	-3.5033	0.000459529	0.00834406	Intron (ENST00000525166.6/120114, intron 2 of 27)	11	92355186	92524949	169764	1	120114	ENST00000528921.1	152291	ENSG00000165323	FAT3	FAT atypical cadherin 3
NYC_19696	chr11	92510213	92510713	501	*	38.8629	-1.74723	0.58933	-2.96477	0.00302907	0.0235638	Intron (ENST00000525166.6/120114, intron 2 of 27)	11	92355186	92524949	169764	1	120114	ENST00000528921.1	155027	ENSG00000165323	FAT3	FAT atypical cadherin 3
NYC_19697	chr11	92510828	92511328	501	*	31.1381	-1.95927	0.549562	-3.56515	0.000363646	0.0075611	Intron (ENST00000525166.6/120114, intron 2 of 27)	11	92355186	92524949	169764	1	120114	ENST00000528921.1	155642	ENSG00000165323	FAT3	FAT atypical cadherin 3
NYC_19698	chr11	92511435	92511935	501	*	35.5935	-2.10957	0.548311	-3.8474	0.000119377	0.00466089	Intron (ENST00000525166.6/120114, intron 2 of 27)	11	92355186	92524949	169764	1	120114	ENST00000528921.1	156249	ENSG00000165323	FAT3	FAT atypical cadherin 3
NYC_19699	chr11	92513017	92513517	501	*	41.4359	-2.11795	0.564068	-3.75477	0.000173499	0.00547801	Intron (ENST00000525166.6/120114, intron 2 of 27)	11	92355186	92524949	169764	1	120114	ENST00000528921.1	157831	ENSG00000165323	FAT3	FAT atypical cadherin 3
NYC_19700	chr11	92514275	92514775	501	*	27.6855	-2.26414	0.695818	-3.25393	0.00113821	0.013175	Intron (ENST00000525166.6/120114, intron 2 of 27)	11	92355186	92524949	169764	1	120114	ENST00000528921.1	159089	ENSG00000165323	FAT3	FAT atypical cadherin 3
NYC_19701	chr11	92514893	92515393	501	*	39.2365	-2.09318	0.535761	-3.90694	9.35e-05	0.00422873	Intron (ENST00000525166.6/120114, intron 2 of 27)	11	92355186	92524949	169764	1	120114	ENST00000528921.1	159707	ENSG00000165323	FAT3	FAT atypical cadherin 3
NYC_19702	chr11	92518350	92518850	501	*	45.2639	-1.76429	0.660287	-2.67201	0.00753982	0.0443747	Intron (ENST00000525166.6/120114, intron 2 of 27)	11	92355186	92524949	169764	1	120114	ENST00000528921.1	163164	ENSG00000165323	FAT3	FAT atypical cadherin 3
NYC_19703	chr11	92521832	92522332	501	*	49.2756	-1.82081	0.447592	-4.06802	4.74e-05	0.00327608	Intron (ENST00000525166.6/120114, intron 2 of 27)	11	92355186	92524949	169764	1	120114	ENST00000528921.1	166646	ENSG00000165323	FAT3	FAT atypical cadherin 3
NYC_19705	chr11	92523049	92523549	501	*	44.8576	-1.68287	0.63182	-2.66352	0.00773275	0.0451962	Intron (ENST00000525166.6/120114, intron 2 of 27)	11	92355186	92524949	169764	1	120114	ENST00000528921.1	167863	ENSG00000165323	FAT3	FAT atypical cadherin 3
NYC_19706	chr11	92524490	92524990	501	*	45.9862	-2.09214	0.517828	-4.04021	5.34e-05	0.00340536	Exon (ENST00000525166.6/120114, exon 3 of 28)	11	92355186	92524949	169764	1	120114	ENST00000528921.1	169304	ENSG00000165323	FAT3	FAT atypical cadherin 3
NYC_19707	chr11	92527108	92527608	501	*	52.8369	-1.55478	0.493559	-3.15013	0.00163198	0.0161255	Intron (ENST00000525166.6/120114, intron 3 of 27)	11	92355186	92524949	169764	1	120114	ENST00000528921.1	171922	ENSG00000165323	FAT3	FAT atypical cadherin 3
NYC_19710	chr11	92531644	92532144	501	*	53.2559	-1.57099	0.534162	-2.94105	0.00327105	0.024744	Intron (ENST00000525166.6/120114, intron 3 of 27)	11	92355186	92524949	169764	1	120114	ENST00000528921.1	176458	ENSG00000165323	FAT3	FAT atypical cadherin 3
NYC_19711	chr11	92533912	92534412	501	*	52.526	-2.0322	0.482668	-4.21035	2.55e-05	0.00260473	Intron (ENST00000525166.6/120114, intron 3 of 27)	11	92355186	92524949	169764	1	120114	ENST00000528921.1	178726	ENSG00000165323	FAT3	FAT atypical cadherin 3
NYC_19712	chr11	92536986	92537486	501	*	60.5394	-1.78334	0.394452	-4.52105	6.15e-06	0.00164006	Intron (ENST00000525166.6/120114, intron 3 of 27)	11	92355186	92524949	169764	1	120114	ENST00000528921.1	181800	ENSG00000165323	FAT3	FAT atypical cadherin 3
NYC_19713	chr11	92538207	92538707	501	*	38.9351	-2.02423	0.619754	-3.26618	0.0010901	0.01283	Intron (ENST00000525166.6/120114, intron 3 of 27)	11	92355186	92524949	169764	1	120114	ENST00000528921.1	183021	ENSG00000165323	FAT3	FAT atypical cadherin 3
NYC_19714	chr11	92539330	92539830	501	*	21.5271	-2.67638	0.606194	-4.41506	1.01e-05	0.00195374	Intron (ENST00000525166.6/120114, intron 3 of 27)	11	92355186	92524949	169764	1	120114	ENST00000528921.1	184144	ENSG00000165323	FAT3	FAT atypical cadherin 3
NYC_19717	chr11	92543621	92544121	501	*	51.0644	-2.17183	0.528419	-4.11005	3.96e-05	0.00305933	Intron (ENST00000525166.6/120114, intron 3 of 27)	11	92355186	92524949	169764	1	120114	ENST00000528921.1	188435	ENSG00000165323	FAT3	FAT atypical cadherin 3
NYC_19718	chr11	92544450	92544950	501	*	46.2456	-1.89384	0.5865	-3.22906	0.00124199	0.0138099	Intron (ENST00000525166.6/120114, intron 3 of 27)	11	92355186	92524949	169764	1	120114	ENST00000528921.1	189264	ENSG00000165323	FAT3	FAT atypical cadherin 3
NYC_19720	chr11	92547432	92547932	501	*	59.2611	-1.94595	0.56262	-3.45872	0.000542748	0.00901094	Intron (ENST00000525166.6/120114, intron 3 of 27)	11	92355186	92524949	169764	1	120114	ENST00000528921.1	192246	ENSG00000165323	FAT3	FAT atypical cadherin 3
NYC_19722	chr11	92550830	92551330	501	*	43.535	-2.1595	0.493086	-4.37957	1.19e-05	0.00203968	Intron (ENST00000525166.6/120114, intron 3 of 27)	11	92355186	92524949	169764	1	120114	ENST00000528921.1	195644	ENSG00000165323	FAT3	FAT atypical cadherin 3
NYC_19723	chr11	92555360	92555860	501	*	51.4636	-1.57956	0.557056	-2.83555	0.00457466	0.0309496	Intron (ENST00000525166.6/120114, intron 3 of 27)	11	92355186	92524949	169764	1	120114	ENST00000528921.1	200174	ENSG00000165323	FAT3	FAT atypical cadherin 3
NYC_19724	chr11	92556144	92556644	501	*	53.9093	-1.59596	0.435487	-3.66477	0.000247558	0.00641023	Intron (ENST00000525166.6/120114, intron 3 of 27)	11	92355186	92524949	169764	1	120114	ENST00000528921.1	200958	ENSG00000165323	FAT3	FAT atypical cadherin 3
NYC_19725	chr11	92558652	92559152	501	*	48.9493	-1.9036	0.707191	-2.69178	0.00710722	0.0424361	Intron (ENST00000525166.6/120114, intron 3 of 27)	11	92355186	92524949	169764	1	120114	ENST00000528921.1	203466	ENSG00000165323	FAT3	FAT atypical cadherin 3
NYC_19726	chr11	92559776	92560276	501	*	42.7838	-2.30303	0.659434	-3.49243	0.000478641	0.00848848	Intron (ENST00000525166.6/120114, intron 3 of 27)	11	92355186	92524949	169764	1	120114	ENST00000528921.1	204590	ENSG00000165323	FAT3	FAT atypical cadherin 3
NYC_19727	chr11	92560981	92561481	501	*	42.6205	-2.17774	0.641419	-3.3952	0.000685797	0.0101106	Intron (ENST00000525166.6/120114, intron 3 of 27)	11	92355186	92524949	169764	1	120114	ENST00000528921.1	205795	ENSG00000165323	FAT3	FAT atypical cadherin 3
NYC_19728	chr11	92562367	92562867	501	*	48.5096	-1.97985	0.541613	-3.65548	0.000256705	0.00651124	Intron (ENST00000525166.6/120114, intron 3 of 27)	11	92355186	92524949	169764	1	120114	ENST00000528921.1	207181	ENSG00000165323	FAT3	FAT atypical cadherin 3
NYC_19729	chr11	92568132	92568632	501	*	39.804	-2.12067	0.658629	-3.21983	0.00128266	0.0140937	Intron (ENST00000525166.6/120114, intron 3 of 27)	11	92355186	92524949	169764	1	120114	ENST00000528921.1	212946	ENSG00000165323	FAT3	FAT atypical cadherin 3
NYC_19731	chr11	92569180	92569680	501	*	35.8528	-1.74332	0.588456	-2.96254	0.00305114	0.0236847	Intron (ENST00000525166.6/120114, intron 3 of 27)	11	92355186	92524949	169764	1	120114	ENST00000528921.1	213994	ENSG00000165323	FAT3	FAT atypical cadherin 3
NYC_19732	chr11	92570054	92570554	501	*	53.9114	-1.70035	0.520224	-3.26849	0.00108124	0.0127728	Intron (ENST00000525166.6/120114, intron 3 of 27)	11	92355186	92524949	169764	1	120114	ENST00000528921.1	214868	ENSG00000165323	FAT3	FAT atypical cadherin 3
NYC_19734	chr11	92573411	92573911	501	*	44.3283	-2.11	0.507212	-4.15999	3.18e-05	0.00287131	Intron (ENST00000525166.6/120114, intron 3 of 27)	11	92355186	92524949	169764	1	120114	ENST00000528921.1	218225	ENSG00000165323	FAT3	FAT atypical cadherin 3
NYC_19735	chr11	92574554	92575054	501	*	51.6754	-1.54803	0.416418	-3.71748	0.00020122	0.00580278	Intron (ENST00000525166.6/120114, intron 3 of 27)	11	92355186	92524949	169764	1	120114	ENST00000528921.1	219368	ENSG00000165323	FAT3	FAT atypical cadherin 3
NYC_19736	chr11	92576402	92576902	501	*	41.6288	-1.7016	0.581727	-2.92508	0.00344371	0.02561	Intron (ENST00000525166.6/120114, intron 3 of 27)	11	92355186	92524949	169764	1	120114	ENST00000528921.1	221216	ENSG00000165323	FAT3	FAT atypical cadherin 3
NYC_19737	chr11	92578227	92578727	501	*	45.9094	-1.80658	0.624783	-2.89152	0.00383379	0.0275126	Intron (ENST00000525166.6/120114, intron 3 of 27)	11	92355186	92524949	169764	1	120114	ENST00000528921.1	223041	ENSG00000165323	FAT3	FAT atypical cadherin 3
NYC_19738	chr11	92579734	92580234	501	*	42.1868	-1.63038	0.620682	-2.62676	0.00862012	0.048965	Intron (ENST00000525166.6/120114, intron 3 of 27)	11	92355186	92524949	169764	1	120114	ENST00000528921.1	224548	ENSG00000165323	FAT3	FAT atypical cadherin 3
NYC_19739	chr11	92581126	92581626	501	*	44.772	-2.0057	0.495212	-4.05018	5.12e-05	0.00336628	Intron (ENST00000525166.6/120114, intron 3 of 27)	11	92355186	92524949	169764	1	120114	ENST00000528921.1	225940	ENSG00000165323	FAT3	FAT atypical cadherin 3
NYC_19740	chr11	92581702	92582202	501	*	43.63	-1.99881	0.523652	-3.81706	0.000135049	0.00490679	Intron (ENST00000525166.6/120114, intron 3 of 27)	11	92355186	92524949	169764	1	120114	ENST00000528921.1	226516	ENSG00000165323	FAT3	FAT atypical cadherin 3
NYC_19741	chr11	92583924	92584424	501	*	35.2837	-2.09242	0.603561	-3.46679	0.000526708	0.0088684	Intron (ENST00000525166.6/120114, intron 3 of 27)	11	92355186	92524949	169764	1	120114	ENST00000528921.1	228738	ENSG00000165323	FAT3	FAT atypical cadherin 3
NYC_19742	chr11	92586009	92586509	501	*	48.7254	-1.57774	0.487003	-3.2397	0.00119657	0.0135442	Intron (ENST00000525166.6/120114, intron 3 of 27)	11	92355186	92524949	169764	1	120114	ENST00000528921.1	230823	ENSG00000165323	FAT3	FAT atypical cadherin 3
NYC_19743	chr11	92588817	92589317	501	*	38.9394	-2.29355	0.613354	-3.73935	0.000184496	0.00559334	Intron (ENST00000525166.6/120114, intron 3 of 27)	11	92355186	92524949	169764	1	120114	ENST00000528921.1	233631	ENSG00000165323	FAT3	FAT atypical cadherin 3
NYC_19744	chr11	92589959	92590459	501	*	39.0961	-1.73586	0.615636	-2.81962	0.00480813	0.0320105	Intron (ENST00000525166.6/120114, intron 3 of 27)	11	92355186	92524949	169764	1	120114	ENST00000528921.1	234773	ENSG00000165323	FAT3	FAT atypical cadherin 3
NYC_19747	chr11	92594145	92594645	501	*	55.8539	-1.29252	0.456426	-2.83183	0.00462831	0.0311771	Intron (ENST00000525166.6/120114, intron 3 of 27)	11	92355186	92524949	169764	1	120114	ENST00000528921.1	238959	ENSG00000165323	FAT3	FAT atypical cadherin 3
NYC_19748	chr11	92595039	92595539	501	*	46.7868	-1.76835	0.601039	-2.94216	0.00325933	0.024692	Intron (ENST00000525166.6/120114, intron 3 of 27)	11	92355186	92524949	169764	1	120114	ENST00000528921.1	239853	ENSG00000165323	FAT3	FAT atypical cadherin 3
NYC_19750	chr11	92598793	92599293	501	*	56.4006	-1.36444	0.426246	-3.20107	0.00136919	0.0146192	Intron (ENST00000525166.6/120114, intron 3 of 27)	11	92355186	92524949	169764	1	120114	ENST00000528921.1	243607	ENSG00000165323	FAT3	FAT atypical cadherin 3
NYC_19751	chr11	92601798	92602298	501	*	46.8628	-1.90368	0.605725	-3.14282	0.00167331	0.0163607	Intron (ENST00000525166.6/120114, intron 3 of 27)	11	92844340	92896305	51966	1	120114	ENST00000533797.1	-242042	ENSG00000165323	FAT3	FAT atypical cadherin 3
NYC_19752	chr11	92602520	92603020	501	*	27.4047	-1.90784	0.609457	-3.1304	0.00174569	0.0168503	Intron (ENST00000525166.6/120114, intron 3 of 27)	11	92844340	92896305	51966	1	120114	ENST00000533797.1	-241320	ENSG00000165323	FAT3	FAT atypical cadherin 3
NYC_19753	chr11	92603037	92603537	501	*	33.5917	-1.92268	0.674655	-2.84987	0.00437375	0.0300414	Intron (ENST00000525166.6/120114, intron 3 of 27)	11	92844340	92896305	51966	1	120114	ENST00000533797.1	-240803	ENSG00000165323	FAT3	FAT atypical cadherin 3
NYC_19754	chr11	92604394	92604894	501	*	61.3393	-1.72175	0.506632	-3.39842	0.000677761	0.0100473	Intron (ENST00000525166.6/120114, intron 3 of 27)	11	92844340	92896305	51966	1	120114	ENST00000533797.1	-239446	ENSG00000165323	FAT3	FAT atypical cadherin 3
NYC_19755	chr11	92606651	92607151	501	*	48.2569	-1.78923	0.477293	-3.74871	0.000177747	0.00550335	Intron (ENST00000525166.6/120114, intron 3 of 27)	11	92844340	92896305	51966	1	120114	ENST00000533797.1	-237189	ENSG00000165323	FAT3	FAT atypical cadherin 3
NYC_19756	chr11	92611740	92612240	501	*	40.7921	-1.79258	0.576098	-3.11159	0.00186086	0.0174939	Intron (ENST00000525166.6/120114, intron 3 of 27)	11	92844340	92896305	51966	1	120114	ENST00000533797.1	-232100	ENSG00000165323	FAT3	FAT atypical cadherin 3
NYC_19757	chr11	92612643	92613143	501	*	45.2464	-1.66769	0.5226	-3.19114	0.00141713	0.01494	Intron (ENST00000525166.6/120114, intron 3 of 27)	11	92844340	92896305	51966	1	120114	ENST00000533797.1	-231197	ENSG00000165323	FAT3	FAT atypical cadherin 3
NYC_19758	chr11	92617995	92618495	501	*	52.4956	-1.82432	0.459135	-3.97338	7.09e-05	0.00384307	Intron (ENST00000525166.6/120114, intron 3 of 27)	11	92844340	92896305	51966	1	120114	ENST00000533797.1	-225845	ENSG00000165323	FAT3	FAT atypical cadherin 3
NYC_19759	chr11	92623078	92623578	501	*	29.3069	-1.78264	0.616191	-2.89299	0.00381588	0.0274273	Intron (ENST00000525166.6/120114, intron 3 of 27)	11	92844340	92896305	51966	1	120114	ENST00000533797.1	-220762	ENSG00000165323	FAT3	FAT atypical cadherin 3
NYC_19760	chr11	92623730	92624230	501	*	39.7146	-2.23011	0.638595	-3.49222	0.000479028	0.00848996	Intron (ENST00000525166.6/120114, intron 3 of 27)	11	92844340	92896305	51966	1	120114	ENST00000533797.1	-220110	ENSG00000165323	FAT3	FAT atypical cadherin 3
NYC_19761	chr11	92625490	92625990	501	*	43.5104	-1.6685	0.56318	-2.96264	0.00305016	0.0236825	Intron (ENST00000525166.6/120114, intron 3 of 27)	11	92844340	92896305	51966	1	120114	ENST00000533797.1	-218350	ENSG00000165323	FAT3	FAT atypical cadherin 3
NYC_19762	chr11	92627746	92628246	501	*	55.5564	-1.30901	0.378756	-3.45608	0.000548094	0.00905447	Intron (ENST00000525166.6/120114, intron 3 of 27)	11	92844340	92896305	51966	1	120114	ENST00000533797.1	-216094	ENSG00000165323	FAT3	FAT atypical cadherin 3
NYC_19763	chr11	92628590	92629090	501	*	50.3005	-1.23155	0.346197	-3.55737	0.00037458	0.00765034	Intron (ENST00000525166.6/120114, intron 3 of 27)	11	92844340	92896305	51966	1	120114	ENST00000533797.1	-215250	ENSG00000165323	FAT3	FAT atypical cadherin 3
NYC_19764	chr11	92629293	92629793	501	*	46.0643	-1.43902	0.542728	-2.65146	0.00801443	0.0463715	Intron (ENST00000525166.6/120114, intron 3 of 27)	11	92844340	92896305	51966	1	120114	ENST00000533797.1	-214547	ENSG00000165323	FAT3	FAT atypical cadherin 3
NYC_19765	chr11	92629917	92630417	501	*	49.6106	-2.05222	0.543241	-3.77773	0.000158266	0.00524331	Intron (ENST00000525166.6/120114, intron 3 of 27)	11	92844340	92896305	51966	1	120114	ENST00000533797.1	-213923	ENSG00000165323	FAT3	FAT atypical cadherin 3
NYC_19766	chr11	92632384	92632884	501	*	51.3881	-1.44252	0.522467	-2.76098	0.00576283	0.0364154	Intron (ENST00000525166.6/120114, intron 3 of 27)	11	92844340	92896305	51966	1	120114	ENST00000533797.1	-211456	ENSG00000165323	FAT3	FAT atypical cadherin 3
NYC_19767	chr11	92633237	92633737	501	*	28.8971	-2.05508	0.596634	-3.44446	0.000572202	0.00925269	Intron (ENST00000525166.6/120114, intron 3 of 27)	11	92844340	92896305	51966	1	120114	ENST00000533797.1	-210603	ENSG00000165323	FAT3	FAT atypical cadherin 3
NYC_19768	chr11	92633756	92634256	501	*	40.9786	-1.41996	0.528947	-2.68451	0.00726373	0.0430945	Intron (ENST00000525166.6/120114, intron 3 of 27)	11	92844340	92896305	51966	1	120114	ENST00000533797.1	-210084	ENSG00000165323	FAT3	FAT atypical cadherin 3
NYC_19769	chr11	92634927	92635427	501	*	46.4659	-1.77712	0.541117	-3.28416	0.00102285	0.0124505	Intron (ENST00000525166.6/120114, intron 3 of 27)	11	92844340	92896305	51966	1	120114	ENST00000533797.1	-208913	ENSG00000165323	FAT3	FAT atypical cadherin 3
NYC_19770	chr11	92635813	92636313	501	*	41.5229	-1.92004	0.583341	-3.29145	0.000996725	0.0122816	Intron (ENST00000525166.6/120114, intron 3 of 27)	11	92844340	92896305	51966	1	120114	ENST00000533797.1	-208027	ENSG00000165323	FAT3	FAT atypical cadherin 3
NYC_19771	chr11	92636501	92637001	501	*	40.0818	-1.53957	0.556226	-2.76789	0.00564206	0.035907	Intron (ENST00000525166.6/120114, intron 3 of 27)	11	92844340	92896305	51966	1	120114	ENST00000533797.1	-207339	ENSG00000165323	FAT3	FAT atypical cadherin 3
NYC_19772	chr11	92637776	92638276	501	*	54.3735	-1.97013	0.458642	-4.29557	1.74e-05	0.00230861	Intron (ENST00000525166.6/120114, intron 3 of 27)	11	92844340	92896305	51966	1	120114	ENST00000533797.1	-206064	ENSG00000165323	FAT3	FAT atypical cadherin 3
NYC_19773	chr11	92639142	92639642	501	*	51.4787	-1.85384	0.60211	-3.07891	0.0020776	0.0186414	Intron (ENST00000525166.6/120114, intron 3 of 27)	11	92844340	92896305	51966	1	120114	ENST00000533797.1	-204698	ENSG00000165323	FAT3	FAT atypical cadherin 3
NYC_19774	chr11	92640002	92640502	501	*	44.6666	-1.9639	0.624802	-3.14324	0.00167089	0.0163427	Intron (ENST00000525166.6/120114, intron 3 of 27)	11	92844340	92896305	51966	1	120114	ENST00000533797.1	-203838	ENSG00000165323	FAT3	FAT atypical cadherin 3
NYC_19775	chr11	92640921	92641421	501	*	43.6399	-1.72561	0.456138	-3.7831	0.00015489	0.00520777	Intron (ENST00000525166.6/120114, intron 3 of 27)	11	92844340	92896305	51966	1	120114	ENST00000533797.1	-202919	ENSG00000165323	FAT3	FAT atypical cadherin 3
NYC_19776	chr11	92642006	92642506	501	*	49.2115	-1.2976	0.478964	-2.70918	0.00674488	0.0408352	Intron (ENST00000525166.6/120114, intron 3 of 27)	11	92844340	92896305	51966	1	120114	ENST00000533797.1	-201834	ENSG00000165323	FAT3	FAT atypical cadherin 3
NYC_19777	chr11	92642642	92643142	501	*	45.0224	-1.45362	0.51255	-2.83606	0.00456737	0.0309268	Intron (ENST00000525166.6/120114, intron 3 of 27)	11	92844340	92896305	51966	1	120114	ENST00000533797.1	-201198	ENSG00000165323	FAT3	FAT atypical cadherin 3
NYC_19778	chr11	92648314	92648814	501	*	51.9147	-1.56876	0.54135	-2.89787	0.00375712	0.0271359	Intron (ENST00000525166.6/120114, intron 3 of 27)	11	92844340	92896305	51966	1	120114	ENST00000533797.1	-195526	ENSG00000165323	FAT3	FAT atypical cadherin 3
NYC_19779	chr11	92649222	92649722	501	*	43.7717	-1.69583	0.486844	-3.48332	0.000495245	0.00861624	Intron (ENST00000525166.6/120114, intron 3 of 27)	11	92844340	92896305	51966	1	120114	ENST00000533797.1	-194618	ENSG00000165323	FAT3	FAT atypical cadherin 3
NYC_19780	chr11	92650480	92650980	501	*	41.5242	-1.47772	0.493281	-2.99569	0.00273829	0.0221427	Intron (ENST00000525166.6/120114, intron 3 of 27)	11	92844340	92896305	51966	1	120114	ENST00000533797.1	-193360	ENSG00000165323	FAT3	FAT atypical cadherin 3
NYC_19781	chr11	92651114	92651614	501	*	53.3595	-1.54302	0.387912	-3.97777	6.96e-05	0.0038089	Intron (ENST00000525166.6/120114, intron 3 of 27)	11	92844340	92896305	51966	1	120114	ENST00000533797.1	-192726	ENSG00000165323	FAT3	FAT atypical cadherin 3
NYC_19782	chr11	92652654	92653154	501	*	46.4849	-1.49231	0.520241	-2.8685	0.00412421	0.0288936	Intron (ENST00000525166.6/120114, intron 3 of 27)	11	92844340	92896305	51966	1	120114	ENST00000533797.1	-191186	ENSG00000165323	FAT3	FAT atypical cadherin 3
NYC_19783	chr11	92653258	92653758	501	*	36.8123	-1.57479	0.527375	-2.98609	0.00282573	0.0225691	Intron (ENST00000525166.6/120114, intron 3 of 27)	11	92844340	92896305	51966	1	120114	ENST00000533797.1	-190582	ENSG00000165323	FAT3	FAT atypical cadherin 3
NYC_19784	chr11	92654438	92654938	501	*	47.5188	-2.07969	0.69772	-2.98069	0.00287595	0.0228138	Intron (ENST00000525166.6/120114, intron 3 of 27)	11	92844340	92896305	51966	1	120114	ENST00000533797.1	-189402	ENSG00000165323	FAT3	FAT atypical cadherin 3
NYC_19785	chr11	92656763	92657263	501	*	39.8875	-1.81474	0.612993	-2.96046	0.00307179	0.0238034	Intron (ENST00000525166.6/120114, intron 3 of 27)	11	92844340	92896305	51966	1	120114	ENST00000533797.1	-187077	ENSG00000165323	FAT3	FAT atypical cadherin 3
NYC_19786	chr11	92657635	92658135	501	*	28.7343	-2.41641	0.764076	-3.16252	0.00156409	0.0157386	Intron (ENST00000525166.6/120114, intron 3 of 27)	11	92844340	92896305	51966	1	120114	ENST00000533797.1	-186205	ENSG00000165323	FAT3	FAT atypical cadherin 3
NYC_19787	chr11	92658225	92658725	501	*	39.5797	-1.78194	0.592897	-3.00548	0.00265161	0.0216899	Intron (ENST00000525166.6/120114, intron 3 of 27)	11	92844340	92896305	51966	1	120114	ENST00000533797.1	-185615	ENSG00000165323	FAT3	FAT atypical cadherin 3
NYC_19788	chr11	92661112	92661612	501	*	45.774	-1.84259	0.613868	-3.00161	0.0026856	0.0218621	Intron (ENST00000525166.6/120114, intron 3 of 27)	11	92844340	92896305	51966	1	120114	ENST00000533797.1	-182728	ENSG00000165323	FAT3	FAT atypical cadherin 3
NYC_19790	chr11	92662732	92663232	501	*	62.3585	-1.31078	0.360081	-3.64023	0.000272389	0.00666282	Intron (ENST00000525166.6/120114, intron 3 of 27)	11	92844340	92896305	51966	1	120114	ENST00000533797.1	-181108	ENSG00000165323	FAT3	FAT atypical cadherin 3
NYC_19791	chr11	92666681	92667181	501	*	55.3841	-1.60282	0.466133	-3.43854	0.000584863	0.00935195	Intron (ENST00000525166.6/120114, intron 3 of 27)	11	92844340	92896305	51966	1	120114	ENST00000533797.1	-177159	ENSG00000165323	FAT3	FAT atypical cadherin 3
NYC_19792	chr11	92667718	92668218	501	*	49.2972	-1.5447	0.523693	-2.94962	0.00318161	0.0243307	Intron (ENST00000525166.6/120114, intron 3 of 27)	11	92844340	92896305	51966	1	120114	ENST00000533797.1	-176122	ENSG00000165323	FAT3	FAT atypical cadherin 3
NYC_19793	chr11	92668876	92669376	501	*	51.6021	-2.07581	0.544063	-3.8154	0.000135965	0.00491225	Intron (ENST00000525166.6/120114, intron 3 of 27)	11	92844340	92896305	51966	1	120114	ENST00000533797.1	-174964	ENSG00000165323	FAT3	FAT atypical cadherin 3
NYC_19794	chr11	92670572	92671072	501	*	38.7904	-1.89423	0.60635	-3.12399	0.00178418	0.0170598	Intron (ENST00000525166.6/120114, intron 3 of 27)	11	92844340	92896305	51966	1	120114	ENST00000533797.1	-173268	ENSG00000165323	FAT3	FAT atypical cadherin 3
NYC_19795	chr11	92671283	92671783	501	*	41.2682	-1.66873	0.53667	-3.10941	0.00187459	0.0175698	Intron (ENST00000525166.6/120114, intron 3 of 27)	11	92844340	92896305	51966	1	120114	ENST00000533797.1	-172557	ENSG00000165323	FAT3	FAT atypical cadherin 3
NYC_19796	chr11	92675359	92675859	501	*	43.5972	-1.78355	0.587347	-3.03663	0.00239243	0.0203867	Intron (ENST00000525166.6/120114, intron 3 of 27)	11	92844340	92896305	51966	1	120114	ENST00000533797.1	-168481	ENSG00000165323	FAT3	FAT atypical cadherin 3
NYC_19797	chr11	92678222	92678722	501	*	40.8438	-1.5418	0.579092	-2.66245	0.00775749	0.045284	Intron (ENST00000525166.6/120114, intron 3 of 27)	11	92844340	92896305	51966	1	120114	ENST00000533797.1	-165618	ENSG00000165323	FAT3	FAT atypical cadherin 3
NYC_19798	chr11	92684457	92684957	501	*	45.3375	-1.64256	0.559269	-2.93697	0.00331437	0.0249669	Intron (ENST00000525166.6/120114, intron 3 of 27)	11	92844340	92896305	51966	1	120114	ENST00000533797.1	-159383	ENSG00000165323	FAT3	FAT atypical cadherin 3
NYC_19801	chr11	92688364	92688864	501	*	31.5139	-2.25701	0.571212	-3.95126	7.77e-05	0.00396278	Intron (ENST00000525166.6/120114, intron 3 of 27)	11	92844340	92896305	51966	1	120114	ENST00000533797.1	-155476	ENSG00000165323	FAT3	FAT atypical cadherin 3
NYC_19802	chr11	92688979	92689479	501	*	42.2225	-1.6012	0.537751	-2.97758	0.00290537	0.0229649	Intron (ENST00000525166.6/120114, intron 3 of 27)	11	92844340	92896305	51966	1	120114	ENST00000533797.1	-154861	ENSG00000165323	FAT3	FAT atypical cadherin 3
NYC_19803	chr11	92691374	92691874	501	*	46.8186	-1.94637	0.583461	-3.33591	0.00085022	0.0113241	Intron (ENST00000525166.6/120114, intron 3 of 27)	11	92844340	92896305	51966	1	120114	ENST00000533797.1	-152466	ENSG00000165323	FAT3	FAT atypical cadherin 3
NYC_19805	chr11	92694706	92695206	501	*	64.984	-1.85846	0.480444	-3.86822	0.000109634	0.00453432	Intron (ENST00000525166.6/120114, intron 3 of 27)	11	92844340	92896305	51966	1	120114	ENST00000533797.1	-149134	ENSG00000165323	FAT3	FAT atypical cadherin 3
NYC_19806	chr11	92695621	92696121	501	*	42.5706	-2.09467	0.620003	-3.37849	0.000728856	0.0104152	Intron (ENST00000525166.6/120114, intron 3 of 27)	11	92844340	92896305	51966	1	120114	ENST00000533797.1	-148219	ENSG00000165323	FAT3	FAT atypical cadherin 3
NYC_19807	chr11	92696220	92696720	501	*	37.0203	-1.88427	0.616653	-3.05564	0.00224582	0.0195618	Intron (ENST00000525166.6/120114, intron 3 of 27)	11	92844340	92896305	51966	1	120114	ENST00000533797.1	-147620	ENSG00000165323	FAT3	FAT atypical cadherin 3
NYC_19808	chr11	92698978	92699478	501	*	36.5419	-1.64665	0.561739	-2.93135	0.00337489	0.0252595	Intron (ENST00000525166.6/120114, intron 4 of 27)	11	92844340	92896305	51966	1	120114	ENST00000533797.1	-144862	ENSG00000165323	FAT3	FAT atypical cadherin 3
NYC_19809	chr11	92699508	92700008	501	*	31.8987	-1.63816	0.623768	-2.62623	0.00863363	0.0490101	Intron (ENST00000525166.6/120114, intron 4 of 27)	11	92844340	92896305	51966	1	120114	ENST00000533797.1	-144332	ENSG00000165323	FAT3	FAT atypical cadherin 3
NYC_19810	chr11	92700221	92700721	501	*	36.0229	-1.87107	0.675523	-2.76981	0.00560894	0.0357501	Intron (ENST00000525166.6/120114, intron 4 of 27)	11	92844340	92896305	51966	1	120114	ENST00000533797.1	-143619	ENSG00000165323	FAT3	FAT atypical cadherin 3
NYC_19811	chr11	92700847	92701347	501	*	42.1641	-1.73894	0.573494	-3.03218	0.00242794	0.0205546	Intron (ENST00000525166.6/120114, intron 4 of 27)	11	92844340	92896305	51966	1	120114	ENST00000533797.1	-142993	ENSG00000165323	FAT3	FAT atypical cadherin 3
NYC_19815	chr11	92703997	92704497	501	*	47.8294	-1.64033	0.531332	-3.0872	0.0020205	0.0183654	Intron (ENST00000525166.6/120114, intron 4 of 27)	11	92844340	92896305	51966	1	120114	ENST00000533797.1	-139843	ENSG00000165323	FAT3	FAT atypical cadherin 3
NYC_19816	chr11	92704615	92705115	501	*	50.1192	-1.36279	0.450128	-3.02756	0.00246535	0.0207363	Intron (ENST00000525166.6/120114, intron 4 of 27)	11	92844340	92896305	51966	1	120114	ENST00000533797.1	-139225	ENSG00000165323	FAT3	FAT atypical cadherin 3
NYC_19817	chr11	92705888	92706388	501	*	54.3555	-1.6304	0.57763	-2.82257	0.004764	0.0317962	Intron (ENST00000525166.6/120114, intron 4 of 27)	11	92844340	92896305	51966	1	120114	ENST00000533797.1	-137952	ENSG00000165323	FAT3	FAT atypical cadherin 3
NYC_19819	chr11	92708239	92708739	501	*	53.6901	-1.86193	0.556963	-3.34301	0.000828757	0.0111505	Intron (ENST00000525166.6/120114, intron 4 of 27)	11	92844340	92896305	51966	1	120114	ENST00000533797.1	-135601	ENSG00000165323	FAT3	FAT atypical cadherin 3
NYC_19820	chr11	92712731	92713231	501	*	41.9905	-1.95319	0.545823	-3.57844	0.000345654	0.00737707	Intron (ENST00000525166.6/120114, intron 4 of 27)	11	92844340	92896305	51966	1	120114	ENST00000533797.1	-131109	ENSG00000165323	FAT3	FAT atypical cadherin 3
NYC_19821	chr11	92714160	92714660	501	*	43.7636	-2.17392	0.648728	-3.35105	0.000805068	0.0110093	Intron (ENST00000525166.6/120114, intron 4 of 27)	11	92844340	92896305	51966	1	120114	ENST00000533797.1	-129680	ENSG00000165323	FAT3	FAT atypical cadherin 3
NYC_19822	chr11	92715355	92715855	501	*	45.3303	-2.28435	0.585196	-3.90357	9.48e-05	0.00425788	Intron (ENST00000525166.6/120114, intron 4 of 27)	11	92844340	92896305	51966	1	120114	ENST00000533797.1	-128485	ENSG00000165323	FAT3	FAT atypical cadherin 3
NYC_19823	chr11	92716403	92716903	501	*	30.1271	-1.86562	0.648693	-2.87596	0.004028	0.0284386	Intron (ENST00000525166.6/120114, intron 4 of 27)	11	92844340	92896305	51966	1	120114	ENST00000533797.1	-127437	ENSG00000165323	FAT3	FAT atypical cadherin 3
NYC_19824	chr11	92716909	92717409	501	*	43.2475	-1.37634	0.494511	-2.78323	0.00538203	0.0347113	Intron (ENST00000525166.6/120114, intron 4 of 27)	11	92844340	92896305	51966	1	120114	ENST00000533797.1	-126931	ENSG00000165323	FAT3	FAT atypical cadherin 3
NYC_19825	chr11	92718145	92718645	501	*	50.2993	-1.69482	0.533945	-3.17414	0.00150283	0.0154445	Intron (ENST00000525166.6/120114, intron 4 of 27)	11	92844340	92896305	51966	1	120114	ENST00000533797.1	-125695	ENSG00000165323	FAT3	FAT atypical cadherin 3
NYC_19826	chr11	92719467	92719967	501	*	50.9372	-1.9935	0.520932	-3.82679	0.000129828	0.00481847	Intron (ENST00000525166.6/120114, intron 4 of 27)	11	92844340	92896305	51966	1	120114	ENST00000533797.1	-124373	ENSG00000165323	FAT3	FAT atypical cadherin 3
NYC_19827	chr11	92720833	92721333	501	*	38.5624	-2.02555	0.660667	-3.06592	0.00217001	0.0191359	Intron (ENST00000525166.6/120114, intron 4 of 27)	11	92844340	92896305	51966	1	120114	ENST00000533797.1	-123007	ENSG00000165323	FAT3	FAT atypical cadherin 3
NYC_19828	chr11	92722344	92722844	501	*	63.7	-1.68836	0.48969	-3.44782	0.000565131	0.00919955	Intron (ENST00000525166.6/120114, intron 4 of 27)	11	92844340	92896305	51966	1	120114	ENST00000533797.1	-121496	ENSG00000165323	FAT3	FAT atypical cadherin 3
NYC_19829	chr11	92724005	92724505	501	*	48.4646	-1.97387	0.49447	-3.9919	6.55e-05	0.00374693	Intron (ENST00000525166.6/120114, intron 4 of 27)	11	92844340	92896305	51966	1	120114	ENST00000533797.1	-119835	ENSG00000165323	FAT3	FAT atypical cadherin 3
NYC_19830	chr11	92727418	92727918	501	*	41.3072	-1.61326	0.528019	-3.0553	0.00224833	0.0195643	Intron (ENST00000525166.6/120114, intron 4 of 27)	11	92844340	92896305	51966	1	120114	ENST00000533797.1	-116422	ENSG00000165323	FAT3	FAT atypical cadherin 3
NYC_19831	chr11	92728063	92728563	501	*	40.6403	-2.12272	0.611881	-3.46917	0.000522067	0.00883548	Intron (ENST00000525166.6/120114, intron 4 of 27)	11	92844340	92896305	51966	1	120114	ENST00000533797.1	-115777	ENSG00000165323	FAT3	FAT atypical cadherin 3
NYC_19832	chr11	92733286	92733786	501	*	55.4949	-1.83957	0.558635	-3.29297	0.00099134	0.0122571	Intron (ENST00000525166.6/120114, intron 4 of 27)	11	92844340	92896305	51966	1	120114	ENST00000533797.1	-110554	ENSG00000165323	FAT3	FAT atypical cadherin 3
NYC_19833	chr11	92737263	92737763	501	*	41.7276	-2.13964	0.664043	-3.22214	0.00127238	0.0140211	Intron (ENST00000525166.6/120114, intron 4 of 27)	11	92844340	92896305	51966	1	120114	ENST00000533797.1	-106577	ENSG00000165323	FAT3	FAT atypical cadherin 3
NYC_19834	chr11	92738325	92738825	501	*	49.7644	-1.66897	0.383127	-4.35619	1.32e-05	0.00210237	Intron (ENST00000525166.6/120114, intron 4 of 27)	11	92844340	92896305	51966	1	120114	ENST00000533797.1	-105515	ENSG00000165323	FAT3	FAT atypical cadherin 3
NYC_19836	chr11	92741815	92742315	501	*	42.9221	-2.12158	0.632933	-3.35198	0.000802362	0.010983	Intron (ENST00000525166.6/120114, intron 4 of 27)	11	92844340	92896305	51966	1	120114	ENST00000533797.1	-102025	ENSG00000165323	FAT3	FAT atypical cadherin 3
NYC_19837	chr11	92742693	92743193	501	*	53.9593	-2.03536	0.550832	-3.69506	0.000219835	0.00604648	Intron (ENST00000525166.6/120114, intron 4 of 27)	11	92844340	92896305	51966	1	120114	ENST00000533797.1	-101147	ENSG00000165323	FAT3	FAT atypical cadherin 3
NYC_19838	chr11	92743655	92744155	501	*	53.7416	-1.81515	0.519178	-3.4962	0.000471933	0.00843557	Intron (ENST00000525166.6/120114, intron 4 of 27)	11	92844340	92896305	51966	1	120114	ENST00000533797.1	-100185	ENSG00000165323	FAT3	FAT atypical cadherin 3
NYC_19839	chr11	92745586	92746086	501	*	47.0073	-1.79155	0.592999	-3.02117	0.00251797	0.0210392	Intron (ENST00000525166.6/120114, intron 4 of 27)	11	92844340	92896305	51966	1	120114	ENST00000533797.1	-98254	ENSG00000165323	FAT3	FAT atypical cadherin 3
NYC_19840	chr11	92746463	92746963	501	*	42.3407	-2.18979	0.496552	-4.40999	1.03e-05	0.00195374	Intron (ENST00000525166.6/120114, intron 4 of 27)	11	92844340	92896305	51966	1	120114	ENST00000533797.1	-97377	ENSG00000165323	FAT3	FAT atypical cadherin 3
NYC_19841	chr11	92747113	92747613	501	*	53.2836	-1.98227	0.537393	-3.68867	0.000225426	0.00614285	Intron (ENST00000525166.6/120114, intron 4 of 27)	11	92844340	92896305	51966	1	120114	ENST00000533797.1	-96727	ENSG00000165323	FAT3	FAT atypical cadherin 3
NYC_19842	chr11	92750065	92750565	501	*	35.6006	-2.02609	0.459198	-4.41225	1.02e-05	0.00195374	Intron (ENST00000525166.6/120114, intron 4 of 27)	11	92844340	92896305	51966	1	120114	ENST00000533797.1	-93775	ENSG00000165323	FAT3	FAT atypical cadherin 3
NYC_19843	chr11	92750646	92751146	501	*	57.8473	-1.19189	0.334241	-3.56596	0.000362526	0.00755443	Intron (ENST00000525166.6/120114, intron 4 of 27)	11	92844340	92896305	51966	1	120114	ENST00000533797.1	-93194	ENSG00000165323	FAT3	FAT atypical cadherin 3
NYC_19844	chr11	92752268	92752768	501	*	43.6277	-1.8785	0.554663	-3.38673	0.000707302	0.0102625	Intron (ENST00000525166.6/120114, intron 4 of 27)	11	92844340	92896305	51966	1	120114	ENST00000533797.1	-91572	ENSG00000165323	FAT3	FAT atypical cadherin 3
NYC_19846	chr11	92753770	92754270	501	*	45.9726	-2.20304	0.520038	-4.23631	2.27e-05	0.00253602	Intron (ENST00000525166.6/120114, intron 4 of 27)	11	92844340	92896305	51966	1	120114	ENST00000533797.1	-90070	ENSG00000165323	FAT3	FAT atypical cadherin 3
NYC_19847	chr11	92755327	92755827	501	*	42.1164	-1.81023	0.525329	-3.44589	0.000569172	0.00923056	Intron (ENST00000525166.6/120114, intron 4 of 27)	11	92844340	92896305	51966	1	120114	ENST00000533797.1	-88513	ENSG00000165323	FAT3	FAT atypical cadherin 3
NYC_19848	chr11	92757769	92758269	501	*	51.4809	-1.73882	0.448414	-3.8777	0.000105449	0.00447374	Intron (ENST00000525166.6/120114, intron 4 of 27)	11	92844340	92896305	51966	1	120114	ENST00000533797.1	-86071	ENSG00000165323	FAT3	FAT atypical cadherin 3
NYC_19849	chr11	92758529	92759029	501	*	56.2129	-1.37575	0.413745	-3.32511	0.000883837	0.0115498	Intron (ENST00000525166.6/120114, intron 4 of 27)	11	92844340	92896305	51966	1	120114	ENST00000533797.1	-85311	ENSG00000165323	FAT3	FAT atypical cadherin 3
NYC_19850	chr11	92759362	92759862	501	*	56.3333	-1.37319	0.388442	-3.53512	0.000407588	0.00790808	Intron (ENST00000525166.6/120114, intron 4 of 27)	11	92844340	92896305	51966	1	120114	ENST00000533797.1	-84478	ENSG00000165323	FAT3	FAT atypical cadherin 3
NYC_19851	chr11	92761071	92761571	501	*	47.4675	-1.74581	0.536712	-3.25279	0.0011428	0.0131892	Intron (ENST00000525166.6/120114, intron 4 of 27)	11	92844340	92896305	51966	1	120114	ENST00000533797.1	-82769	ENSG00000165323	FAT3	FAT atypical cadherin 3
NYC_19852	chr11	92761822	92762322	501	*	43.0751	-2.16698	0.560914	-3.86331	0.000111861	0.00456333	Exon (ENST00000525166.6/120114, exon 5 of 28)	11	92844340	92896305	51966	1	120114	ENST00000533797.1	-82018	ENSG00000165323	FAT3	FAT atypical cadherin 3
NYC_19853	chr11	92763104	92763604	501	*	61.3353	-1.37378	0.376347	-3.6503	0.000261933	0.00655335	Intron (ENST00000525166.6/120114, intron 5 of 27)	11	92844340	92896305	51966	1	120114	ENST00000533797.1	-80736	ENSG00000165323	FAT3	FAT atypical cadherin 3
NYC_19854	chr11	92764198	92764698	501	*	43.1384	-1.45538	0.406276	-3.58224	0.000340659	0.00733486	Intron (ENST00000525166.6/120114, intron 5 of 27)	11	92844340	92896305	51966	1	120114	ENST00000533797.1	-79642	ENSG00000165323	FAT3	FAT atypical cadherin 3
NYC_19855	chr11	92764705	92765205	501	*	40.8376	-1.53591	0.467648	-3.28433	0.00102227	0.0124505	Exon (ENST00000525166.6/120114, exon 6 of 28)	11	92844340	92896305	51966	1	120114	ENST00000533797.1	-79135	ENSG00000165323	FAT3	FAT atypical cadherin 3
NYC_19856	chr11	92766070	92766570	501	*	49.338	-1.85734	0.541094	-3.43256	0.000597905	0.00944372	Intron (ENST00000525166.6/120114, intron 6 of 27)	11	92844340	92896305	51966	1	120114	ENST00000533797.1	-77770	ENSG00000165323	FAT3	FAT atypical cadherin 3
NYC_19857	chr11	92767196	92767696	501	*	61.3071	-1.71473	0.376379	-4.55586	5.22e-06	0.00157812	Intron (ENST00000525166.6/120114, intron 6 of 27)	11	92844340	92896305	51966	1	120114	ENST00000533797.1	-76644	ENSG00000165323	FAT3	FAT atypical cadherin 3
NYC_19858	chr11	92767706	92768206	501	*	39.0246	-1.71572	0.535138	-3.20612	0.00134539	0.0144673	Intron (ENST00000525166.6/120114, intron 6 of 27)	11	92844340	92896305	51966	1	120114	ENST00000533797.1	-76134	ENSG00000165323	FAT3	FAT atypical cadherin 3
NYC_19859	chr11	92770489	92770989	501	*	48.1328	-1.91923	0.486471	-3.94521	7.97e-05	0.00402007	Intron (ENST00000525166.6/120114, intron 6 of 27)	11	92844340	92896305	51966	1	120114	ENST00000533797.1	-73351	ENSG00000165323	FAT3	FAT atypical cadherin 3
NYC_19860	chr11	92771439	92771939	501	*	45.7485	-2.22082	0.66771	-3.32603	0.000880939	0.0115389	Intron (ENST00000525166.6/120114, intron 6 of 27)	11	92844340	92896305	51966	1	120114	ENST00000533797.1	-72401	ENSG00000165323	FAT3	FAT atypical cadherin 3
NYC_19861	chr11	92774844	92775344	501	*	45.6682	-1.77576	0.503611	-3.52605	0.000421805	0.00804475	Intron (ENST00000525166.6/120114, intron 7 of 27)	11	92844340	92896305	51966	1	120114	ENST00000533797.1	-68996	ENSG00000165323	FAT3	FAT atypical cadherin 3
NYC_19862	chr11	92776232	92776732	501	*	45.45	-1.5738	0.523715	-3.00506	0.00265527	0.0217068	Intron (ENST00000525166.6/120114, intron 7 of 27)	11	92844340	92896305	51966	1	120114	ENST00000533797.1	-67608	ENSG00000165323	FAT3	FAT atypical cadherin 3
NYC_19863	chr11	92777517	92778017	501	*	40.921	-1.87659	0.543068	-3.45553	0.000549203	0.00906427	Intron (ENST00000525166.6/120114, intron 7 of 27)	11	92844340	92896305	51966	1	120114	ENST00000533797.1	-66323	ENSG00000165323	FAT3	FAT atypical cadherin 3
NYC_19864	chr11	92780007	92780507	501	*	47.3487	-1.64508	0.614485	-2.67717	0.00742476	0.0438499	Intron (ENST00000525166.6/120114, intron 7 of 27)	11	92844340	92896305	51966	1	120114	ENST00000533797.1	-63833	ENSG00000165323	FAT3	FAT atypical cadherin 3
NYC_19866	chr11	92789243	92789743	501	*	44.0612	-1.75446	0.555993	-3.15553	0.00160205	0.0159597	Intron (ENST00000525166.6/120114, intron 7 of 27)	11	92844340	92896305	51966	1	120114	ENST00000533797.1	-54597	ENSG00000165323	FAT3	FAT atypical cadherin 3
NYC_19868	chr11	92790981	92791481	501	*	45.6243	-2.06513	0.518523	-3.98272	6.81e-05	0.00378703	Intron (ENST00000525166.6/120114, intron 8 of 27)	11	92844340	92896305	51966	1	120114	ENST00000533797.1	-52859	ENSG00000165323	FAT3	FAT atypical cadherin 3
NYC_19869	chr11	92792214	92792714	501	*	52.5288	-1.90589	0.492684	-3.86839	0.000109557	0.00453432	Intron (ENST00000525166.6/120114, intron 8 of 27)	11	92844340	92896305	51966	1	120114	ENST00000533797.1	-51626	ENSG00000165323	FAT3	FAT atypical cadherin 3
NYC_19870	chr11	92794927	92795427	501	*	38.1899	-2.27065	0.543103	-4.18088	2.9e-05	0.00280516	Intron (ENST00000525166.6/120114, intron 9 of 27)	11	92844340	92896305	51966	1	120114	ENST00000533797.1	-48913	ENSG00000165323	FAT3	FAT atypical cadherin 3
NYC_19871	chr11	92795541	92796041	501	*	38.9748	-1.99664	0.577755	-3.45586	0.000548545	0.00905609	Intron (ENST00000525166.6/120114, intron 9 of 27)	11	92844340	92896305	51966	1	120114	ENST00000533797.1	-48299	ENSG00000165323	FAT3	FAT atypical cadherin 3
NYC_19873	chr11	92797283	92797783	501	*	36.1167	-2.22404	0.615077	-3.61587	0.000299342	0.00692523	Intron (ENST00000525166.6/120114, intron 9 of 27)	11	92844340	92896305	51966	1	120114	ENST00000533797.1	-46557	ENSG00000165323	FAT3	FAT atypical cadherin 3
NYC_19874	chr11	92797932	92798432	501	*	34.9693	-1.7296	0.613575	-2.81888	0.00481911	0.0320607	Exon (ENST00000525166.6/120114, exon 10 of 28)	11	92844340	92896305	51966	1	120114	ENST00000533797.1	-45908	ENSG00000165323	FAT3	FAT atypical cadherin 3
NYC_19875	chr11	92798935	92799435	501	*	53.8446	-1.82161	0.587396	-3.10116	0.00192761	0.0178506	Exon (ENST00000525166.6/120114, exon 10 of 28)	11	92844340	92896305	51966	1	120114	ENST00000533797.1	-44905	ENSG00000165323	FAT3	FAT atypical cadherin 3
NYC_19877	chr11	92800190	92800690	501	*	42.9931	-1.28829	0.444353	-2.89924	0.00374066	0.0270486	Exon (ENST00000525166.6/120114, exon 10 of 28)	11	92844340	92896305	51966	1	120114	ENST00000533797.1	-43650	ENSG00000165323	FAT3	FAT atypical cadherin 3
NYC_19878	chr11	92800883	92801383	501	*	36.4183	-1.87039	0.5821	-3.21318	0.00131276	0.0142562	Exon (ENST00000525166.6/120114, exon 10 of 28)	11	92844340	92896305	51966	1	120114	ENST00000533797.1	-42957	ENSG00000165323	FAT3	FAT atypical cadherin 3
NYC_19879	chr11	92801421	92801921	501	*	48.3741	-1.44976	0.494119	-2.93403	0.00334591	0.0251402	Exon (ENST00000525166.6/120114, exon 10 of 28)	11	92844340	92896305	51966	1	120114	ENST00000533797.1	-42419	ENSG00000165323	FAT3	FAT atypical cadherin 3
NYC_19880	chr11	92803412	92803912	501	*	54.6611	-1.50076	0.510569	-2.93939	0.00328859	0.0248464	Intron (ENST00000525166.6/120114, intron 10 of 27)	11	92844340	92896305	51966	1	120114	ENST00000533797.1	-40428	ENSG00000165323	FAT3	FAT atypical cadherin 3
NYC_19881	chr11	92804049	92804549	501	*	38.9099	-1.65438	0.526491	-3.14228	0.00167639	0.0163771	Intron (ENST00000525166.6/120114, intron 10 of 27)	11	92844340	92896305	51966	1	120114	ENST00000533797.1	-39791	ENSG00000165323	FAT3	FAT atypical cadherin 3
NYC_19883	chr11	92805844	92806344	501	*	39.7911	-2.08618	0.535196	-3.89797	9.7e-05	0.00428657	Intron (ENST00000525166.6/120114, intron 11 of 27)	11	92844340	92896305	51966	1	120114	ENST00000533797.1	-37996	ENSG00000165323	FAT3	FAT atypical cadherin 3
NYC_19885	chr11	92812117	92812617	501	*	44.982	-2.08581	0.580621	-3.59237	0.000327681	0.00722861	Intron (ENST00000525166.6/120114, intron 13 of 27)	11	92844340	92896305	51966	1	120114	ENST00000533797.1	-31723	ENSG00000165323	FAT3	FAT atypical cadherin 3
NYC_19886	chr11	92814443	92814943	501	*	48.0071	-2.23582	0.679374	-3.291	0.000998305	0.0122821	Intron (ENST00000525166.6/120114, intron 13 of 27)	11	92844340	92896305	51966	1	120114	ENST00000533797.1	-29397	ENSG00000165323	FAT3	FAT atypical cadherin 3
NYC_19887	chr11	92815549	92816049	501	*	41.5522	-2.31465	0.626664	-3.69361	0.000221089	0.00606903	Intron (ENST00000525166.6/120114, intron 13 of 27)	11	92844340	92896305	51966	1	120114	ENST00000533797.1	-28291	ENSG00000165323	FAT3	FAT atypical cadherin 3
NYC_19888	chr11	92816196	92816696	501	*	58.6341	-1.44218	0.44476	-3.24261	0.0011844	0.013483	Intron (ENST00000525166.6/120114, intron 13 of 27)	11	92844340	92896305	51966	1	120114	ENST00000533797.1	-27644	ENSG00000165323	FAT3	FAT atypical cadherin 3
NYC_19889	chr11	92817320	92817820	501	*	38.9972	-1.56816	0.579688	-2.70517	0.00682687	0.0411791	Intron (ENST00000525166.6/120114, intron 13 of 27)	11	92844340	92896305	51966	1	120114	ENST00000533797.1	-26520	ENSG00000165323	FAT3	FAT atypical cadherin 3
NYC_19890	chr11	92818135	92818635	501	*	51.2924	-1.67491	0.477891	-3.5048	0.000456948	0.00833644	Intron (ENST00000525166.6/120114, intron 13 of 27)	11	92844340	92896305	51966	1	120114	ENST00000533797.1	-25705	ENSG00000165323	FAT3	FAT atypical cadherin 3
NYC_19891	chr11	92818970	92819470	501	*	50.8426	-1.60964	0.542015	-2.96973	0.00298057	0.0233293	Intron (ENST00000525166.6/120114, intron 13 of 27)	11	92844340	92896305	51966	1	120114	ENST00000533797.1	-24870	ENSG00000165323	FAT3	FAT atypical cadherin 3
NYC_19892	chr11	92820324	92820824	501	*	48.6601	-1.65024	0.364577	-4.52645	6e-06	0.00164006	Intron (ENST00000525166.6/120114, intron 13 of 27)	11	92844340	92896305	51966	1	120114	ENST00000533797.1	-23516	ENSG00000165323	FAT3	FAT atypical cadherin 3
NYC_19893	chr11	92823135	92823635	501	*	49.5299	-1.43204	0.487544	-2.93726	0.00331125	0.0249485	Intron (ENST00000525166.6/120114, intron 13 of 27)	11	92844340	92896305	51966	1	120114	ENST00000533797.1	-20705	ENSG00000165323	FAT3	FAT atypical cadherin 3
NYC_19894	chr11	92825580	92826080	501	*	49.039	-1.67356	0.384317	-4.35463	1.33e-05	0.00210476	Intron (ENST00000525166.6/120114, intron 13 of 27)	11	92844340	92896305	51966	1	120114	ENST00000533797.1	-18260	ENSG00000165323	FAT3	FAT atypical cadherin 3
NYC_19896	chr11	92826989	92827489	501	*	51.5299	-1.84361	0.588989	-3.13013	0.00174728	0.0168598	Intron (ENST00000525166.6/120114, intron 13 of 27)	11	92844340	92896305	51966	1	120114	ENST00000533797.1	-16851	ENSG00000165323	FAT3	FAT atypical cadherin 3
NYC_19897	chr11	92831547	92832047	501	*	59.2393	-1.64138	0.473264	-3.46821	0.000523947	0.00885122	Exon (ENST00000525166.6/120114, exon 14 of 28)	11	92844340	92896305	51966	1	120114	ENST00000533797.1	-12293	ENSG00000165323	FAT3	FAT atypical cadherin 3
NYC_19901	chr11	92839454	92839954	501	*	49.9784	-1.615	0.502766	-3.21224	0.00131704	0.0142806	Intron (ENST00000525166.6/120114, intron 17 of 27)	11	92844340	92896305	51966	1	120114	ENST00000533797.1	-4386	ENSG00000165323	FAT3	FAT atypical cadherin 3
NYC_19902	chr11	92841354	92841854	501	*	55.2064	-1.39723	0.431627	-3.23712	0.00120743	0.0136015	Promoter (2-3kb)	11	92844340	92896305	51966	1	120114	ENST00000533797.1	-2486	ENSG00000165323	FAT3	FAT atypical cadherin 3
NYC_19903	chr11	92842539	92843039	501	*	60.914	-1.79178	0.448179	-3.99792	6.39e-05	0.00369512	Promoter (1-2kb)	11	92844340	92896305	51966	1	120114	ENST00000533797.1	-1301	ENSG00000165323	FAT3	FAT atypical cadherin 3
NYC_19905	chr11	92844223	92844723	501	*	51.1408	-1.79152	0.433624	-4.13151	3.6e-05	0.00298544	Promoter (<=1kb)	11	92844340	92896305	51966	1	120114	ENST00000533797.1	0	ENSG00000165323	FAT3	FAT atypical cadherin 3
NYC_19906	chr11	92844754	92845254	501	*	41.5438	-1.26996	0.426163	-2.97998	0.00288263	0.0228571	Promoter (<=1kb)	11	92844340	92896305	51966	1	120114	ENST00000533797.1	414	ENSG00000165323	FAT3	FAT atypical cadherin 3
NYC_19908	chr11	92846875	92847375	501	*	71.6852	-1.51181	0.357168	-4.23276	2.31e-05	0.00255013	Promoter (2-3kb)	11	92844340	92896305	51966	1	120114	ENST00000533797.1	2535	ENSG00000165323	FAT3	FAT atypical cadherin 3
NYC_19909	chr11	92847792	92848292	501	*	33.516	-2.05682	0.707993	-2.90514	0.00367088	0.0267104	Intron (ENST00000525166.6/120114, intron 19 of 27)	11	92844340	92896305	51966	1	120114	ENST00000533797.1	3452	ENSG00000165323	FAT3	FAT atypical cadherin 3
NYC_19910	chr11	92848555	92849055	501	*	75.7465	-1.10902	0.271864	-4.07934	4.52e-05	0.0032305	Intron (ENST00000525166.6/120114, intron 19 of 27)	11	92844340	92896305	51966	1	120114	ENST00000533797.1	4215	ENSG00000165323	FAT3	FAT atypical cadherin 3
NYC_19911	chr11	92849728	92850228	501	*	49.3593	-1.58392	0.552183	-2.86848	0.00412454	0.0288936	Intron (ENST00000525166.6/120114, intron 19 of 27)	11	92844340	92896305	51966	1	120114	ENST00000533797.1	5388	ENSG00000165323	FAT3	FAT atypical cadherin 3
NYC_19912	chr11	92851650	92852150	501	*	45.9492	-1.64916	0.569585	-2.89537	0.00378711	0.0273068	Intron (ENST00000525166.6/120114, intron 19 of 27)	11	92844340	92896305	51966	1	120114	ENST00000533797.1	7310	ENSG00000165323	FAT3	FAT atypical cadherin 3
NYC_19914	chr11	92853902	92854402	501	*	62.2469	-1.46984	0.419874	-3.50066	0.000464101	0.00837924	Intron (ENST00000525166.6/120114, intron 19 of 27)	11	92844340	92896305	51966	1	120114	ENST00000533797.1	9562	ENSG00000165323	FAT3	FAT atypical cadherin 3
NYC_19916	chr11	92856386	92856886	501	*	51.7198	-1.73478	0.498436	-3.48046	0.000500555	0.00865434	Intron (ENST00000525166.6/120114, intron 19 of 27)	11	92844340	92896305	51966	1	120114	ENST00000533797.1	12046	ENSG00000165323	FAT3	FAT atypical cadherin 3
NYC_19918	chr11	92860965	92861465	501	*	36.7278	-2.01689	0.651214	-3.09712	0.00195411	0.0179717	Intron (ENST00000525166.6/120114, intron 21 of 27)	11	92844340	92896305	51966	1	120114	ENST00000533797.1	16625	ENSG00000165323	FAT3	FAT atypical cadherin 3
NYC_19920	chr11	92864735	92865235	501	*	53.5439	-1.83627	0.577914	-3.1774	0.00148599	0.0153818	Intron (ENST00000525166.6/120114, intron 21 of 27)	11	92883299	92890862	7564	1	120114	ENST00000489716.1	-18064	ENSG00000165323	FAT3	FAT atypical cadherin 3
NYC_19921	chr11	92865541	92866041	501	*	55.5655	-1.14783	0.43087	-2.66398	0.00772221	0.0451718	Intron (ENST00000525166.6/120114, intron 21 of 27)	11	92883299	92890862	7564	1	120114	ENST00000489716.1	-17258	ENSG00000165323	FAT3	FAT atypical cadherin 3
NYC_19922	chr11	92866138	92866638	501	*	33.7599	-1.4503	0.548863	-2.64237	0.00823281	0.0472934	Intron (ENST00000525166.6/120114, intron 21 of 27)	11	92883299	92890862	7564	1	120114	ENST00000489716.1	-16661	ENSG00000165323	FAT3	FAT atypical cadherin 3
NYC_19923	chr11	92866692	92867192	501	*	51.5033	-1.85065	0.492061	-3.76102	0.00016922	0.00538854	Exon (ENST00000525166.6/120114, exon 22 of 28)	11	92883299	92890862	7564	1	120114	ENST00000489716.1	-16107	ENSG00000165323	FAT3	FAT atypical cadherin 3
NYC_19924	chr11	92869075	92869575	501	*	55.5887	-1.79014	0.539622	-3.3174	0.0009086	0.0117038	Intron (ENST00000525166.6/120114, intron 22 of 27)	11	92883299	92890862	7564	1	120114	ENST00000489716.1	-13724	ENSG00000165323	FAT3	FAT atypical cadherin 3
NYC_19925	chr11	92870836	92871336	501	*	52.4119	-1.47738	0.501775	-2.9443	0.00323684	0.0245925	Intron (ENST00000525166.6/120114, intron 22 of 27)	11	92883299	92890862	7564	1	120114	ENST00000489716.1	-11963	ENSG00000165323	FAT3	FAT atypical cadherin 3
NYC_19926	chr11	92872942	92873442	501	*	47.8882	-1.61205	0.47847	-3.36918	0.000753922	0.0106082	Intron (ENST00000525166.6/120114, intron 22 of 27)	11	92883299	92890862	7564	1	120114	ENST00000489716.1	-9857	ENSG00000165323	FAT3	FAT atypical cadherin 3
NYC_19927	chr11	92873616	92874116	501	*	28.6717	-2.03425	0.60475	-3.36379	0.000768798	0.0107157	Intron (ENST00000525166.6/120114, intron 22 of 27)	11	92883299	92890862	7564	1	120114	ENST00000489716.1	-9183	ENSG00000165323	FAT3	FAT atypical cadherin 3
NYC_19928	chr11	92874568	92875068	501	*	35.7463	-1.92323	0.5756	-3.34125	0.000834012	0.0111916	Intron (ENST00000525166.6/120114, intron 22 of 27)	11	92883299	92890862	7564	1	120114	ENST00000489716.1	-8231	ENSG00000165323	FAT3	FAT atypical cadherin 3
NYC_19929	chr11	92875536	92876036	501	*	55.6698	-1.61576	0.418898	-3.85717	0.000114706	0.00459252	Intron (ENST00000525166.6/120114, intron 22 of 27)	11	92883299	92890862	7564	1	120114	ENST00000489716.1	-7263	ENSG00000165323	FAT3	FAT atypical cadherin 3
NYC_19934	chr11	92883005	92883505	501	*	61.4476	-1.48848	0.431233	-3.45168	0.000557104	0.00914849	Promoter (<=1kb)	11	92883299	92890862	7564	1	120114	ENST00000489716.1	0	ENSG00000165323	FAT3	FAT atypical cadherin 3
NYC_19936	chr11	92884517	92885017	501	*	46.981	-1.6743	0.55685	-3.00674	0.00264067	0.0216352	Promoter (1-2kb)	11	92883299	92890862	7564	1	120114	ENST00000489716.1	1218	ENSG00000165323	FAT3	FAT atypical cadherin 3
NYC_19938	chr11	92888476	92888976	501	*	59.2948	-1.46572	0.465679	-3.14749	0.0016468	0.0162006	Promoter (1-2kb)	11	92886865	92890626	3762	1	120114	ENST00000469900.1	1611	ENSG00000165323	FAT3	FAT atypical cadherin 3
NYC_19939	chr11	92889973	92890473	501	*	58.2614	-1.41019	0.5045	-2.79522	0.00518645	0.0337851	Intron (ENST00000525166.6/120114, intron 27 of 27)	11	92886865	92890626	3762	1	120114	ENST00000469900.1	3108	ENSG00000165323	FAT3	FAT atypical cadherin 3
NYC_19940	chr11	92890758	92891258	501	*	55.7619	-1.55392	0.473999	-3.27831	0.00104431	0.0125796	3' UTR	11	92886865	92890626	3762	1	120114	ENST00000469900.1	3893	ENSG00000165323	FAT3	FAT atypical cadherin 3
NYC_19941	chr11	92893769	92894269	501	*	48.8001	-1.73507	0.600575	-2.88902	0.00386449	0.0276578	3' UTR	11	92886865	92890626	3762	1	120114	ENST00000469900.1	6904	ENSG00000165323	FAT3	FAT atypical cadherin 3
NYC_19942	chr11	92897410	92897910	501	*	52.1515	-1.40988	0.438936	-3.21204	0.00131796	0.014285	Distal Intergenic	11	92886865	92890626	3762	1	120114	ENST00000469900.1	10545	ENSG00000165323	FAT3	FAT atypical cadherin 3
NYC_19943	chr11	92898128	92898628	501	*	50.3425	-1.62348	0.593385	-2.73597	0.00621976	0.0384553	Distal Intergenic	11	92886865	92890626	3762	1	120114	ENST00000469900.1	11263	ENSG00000165323	FAT3	FAT atypical cadherin 3
NYC_19944	chr11	92899378	92899878	501	*	50.1554	-1.92517	0.595249	-3.23423	0.00121969	0.0136951	Distal Intergenic	11	92886865	92890626	3762	1	120114	ENST00000469900.1	12513	ENSG00000165323	FAT3	FAT atypical cadherin 3
NYC_19945	chr11	92900859	92901359	501	*	55.0125	-1.52695	0.473366	-3.22573	0.00125652	0.013913	Distal Intergenic	11	92886865	92890626	3762	1	120114	ENST00000469900.1	13994	ENSG00000165323	FAT3	FAT atypical cadherin 3
NYC_19946	chr11	92902660	92903160	501	*	40.4159	-2.08275	0.628252	-3.31515	0.000915926	0.0117438	Distal Intergenic	11	92913227	92915644	2418	2	105369431	ENST00000635432.2	12484	ENSG00000282916	LINC02746	long intergenic non-protein coding RNA 2746
NYC_19947	chr11	92904757	92905257	501	*	43.7314	-1.68213	0.640262	-2.62725	0.0086078	0.0489345	Distal Intergenic	11	92913227	92915644	2418	2	105369431	ENST00000635432.2	10387	ENSG00000282916	LINC02746	long intergenic non-protein coding RNA 2746
NYC_19949	chr11	92907319	92907819	501	*	53.8857	-1.61713	0.475259	-3.40262	0.000667424	0.00998208	Distal Intergenic	11	92913227	92915644	2418	2	105369431	ENST00000635432.2	7825	ENSG00000282916	LINC02746	long intergenic non-protein coding RNA 2746
NYC_19950	chr11	92908277	92908777	501	*	37.4192	-1.44082	0.542379	-2.65647	0.00789627	0.0459025	Distal Intergenic	11	92913227	92915644	2418	2	105369431	ENST00000635432.2	6867	ENSG00000282916	LINC02746	long intergenic non-protein coding RNA 2746
NYC_19951	chr11	92908898	92909398	501	*	44.6093	-1.54111	0.524516	-2.93815	0.00330179	0.0249046	Distal Intergenic	11	92913227	92915644	2418	2	105369431	ENST00000635432.2	6246	ENSG00000282916	LINC02746	long intergenic non-protein coding RNA 2746
NYC_19952	chr11	92909687	92910187	501	*	51.8395	-1.33536	0.483685	-2.76081	0.00576587	0.0364305	Distal Intergenic	11	92913227	92915644	2418	2	105369431	ENST00000635432.2	5457	ENSG00000282916	LINC02746	long intergenic non-protein coding RNA 2746
NYC_19953	chr11	92910711	92911211	501	*	50.7691	-1.69682	0.453344	-3.74291	0.000181904	0.00556377	Distal Intergenic	11	92913227	92915644	2418	2	105369431	ENST00000635432.2	4433	ENSG00000282916	LINC02746	long intergenic non-protein coding RNA 2746
NYC_19954	chr11	92911896	92912396	501	*	40.2814	-1.61079	0.520489	-3.09477	0.00196965	0.0180568	Distal Intergenic	11	92913227	92915644	2418	2	105369431	ENST00000635432.2	3248	ENSG00000282916	LINC02746	long intergenic non-protein coding RNA 2746
NYC_19955	chr11	92913196	92913696	501	*	53.545	-1.70077	0.427531	-3.97811	6.95e-05	0.00380808	Promoter (1-2kb)	11	92913227	92915644	2418	2	105369431	ENST00000635432.2	1948	ENSG00000282916	LINC02746	long intergenic non-protein coding RNA 2746
NYC_19956	chr11	92914715	92915215	501	*	60.3487	-1.6814	0.464166	-3.6224	0.000291878	0.00685179	Promoter (<=1kb)	11	92913227	92915644	2418	2	105369431	ENST00000635432.2	429	ENSG00000282916	LINC02746	long intergenic non-protein coding RNA 2746
NYC_19957	chr11	92915866	92916366	501	*	56.1877	-1.51915	0.434393	-3.49718	0.0004702	0.00841888	Promoter (<=1kb)	11	92913227	92915644	2418	2	105369431	ENST00000635432.2	-222	ENSG00000282916	LINC02746	long intergenic non-protein coding RNA 2746
NYC_19958	chr11	92916610	92917110	501	*	43.203	-1.4017	0.481168	-2.91312	0.00357832	0.0262385	Promoter (<=1kb)	11	92913227	92915644	2418	2	105369431	ENST00000635432.2	-966	ENSG00000282916	LINC02746	long intergenic non-protein coding RNA 2746
NYC_19959	chr11	92917641	92918141	501	*	46.9176	-1.80123	0.432947	-4.16039	3.18e-05	0.00287131	Promoter (1-2kb)	11	92913227	92915644	2418	2	105369431	ENST00000635432.2	-1997	ENSG00000282916	LINC02746	long intergenic non-protein coding RNA 2746
NYC_19960	chr11	92922688	92923188	501	*	48.3562	-1.46141	0.533865	-2.73741	0.00619256	0.0383381	Intron (ENST00000634657.1/ENST00000634657.1, intron 1 of 1)	11	92913227	92915644	2418	2	105369431	ENST00000635432.2	-7044	ENSG00000282916	LINC02746	long intergenic non-protein coding RNA 2746
NYC_19961	chr11	92925021	92925521	501	*	55.276	-1.96213	0.478915	-4.09703	4.18e-05	0.00311174	Intron (ENST00000634657.1/ENST00000634657.1, intron 1 of 1)	11	92913227	92915644	2418	2	105369431	ENST00000635432.2	-9377	ENSG00000282916	LINC02746	long intergenic non-protein coding RNA 2746
NYC_19962	chr11	92926058	92926558	501	*	54.5752	-1.94136	0.463251	-4.19073	2.78e-05	0.00274217	Intron (ENST00000634657.1/ENST00000634657.1, intron 1 of 1)	11	92913227	92915644	2418	2	105369431	ENST00000635432.2	-10414	ENSG00000282916	LINC02746	long intergenic non-protein coding RNA 2746
NYC_19965	chr11	92930269	92930769	501	*	51.1702	-1.7614	0.531785	-3.31225	0.000925482	0.0118151	Intron (ENST00000634657.1/ENST00000634657.1, intron 1 of 1)	11	92913227	92915644	2418	2	105369431	ENST00000635432.2	-14625	ENSG00000282916	LINC02746	long intergenic non-protein coding RNA 2746
NYC_19966	chr11	92932326	92932826	501	*	40.551	-1.87208	0.568861	-3.29092	0.000998617	0.0122833	Distal Intergenic	11	92913227	92915644	2418	2	105369431	ENST00000635432.2	-16682	ENSG00000282916	LINC02746	long intergenic non-protein coding RNA 2746
NYC_19967	chr11	92932945	92933445	501	*	39.9291	-1.3493	0.508174	-2.65519	0.00792634	0.0460246	Distal Intergenic	11	92913227	92915644	2418	2	105369431	ENST00000635432.2	-17301	ENSG00000282916	LINC02746	long intergenic non-protein coding RNA 2746
NYC_19968	chr11	92933560	92934060	501	*	45.6707	-1.71115	0.607742	-2.81559	0.00486875	0.0323102	Distal Intergenic	11	92913227	92915644	2418	2	105369431	ENST00000635432.2	-17916	ENSG00000282916	LINC02746	long intergenic non-protein coding RNA 2746
NYC_19971	chr11	92936022	92936522	501	*	43.2203	-1.82765	0.535289	-3.41433	0.000639392	0.00978006	Distal Intergenic	11	92913227	92915644	2418	2	105369431	ENST00000635432.2	-20378	ENSG00000282916	LINC02746	long intergenic non-protein coding RNA 2746
NYC_19973	chr11	92937976	92938476	501	*	46.817	-1.79772	0.480232	-3.74343	0.000181522	0.00556377	Distal Intergenic	11	92913227	92915644	2418	2	105369431	ENST00000635432.2	-22332	ENSG00000282916	LINC02746	long intergenic non-protein coding RNA 2746
NYC_19974	chr11	92938920	92939420	501	*	40.0868	-1.96523	0.595419	-3.30059	0.00096483	0.0120599	Distal Intergenic	11	92913227	92915644	2418	2	105369431	ENST00000635432.2	-23276	ENSG00000282916	LINC02746	long intergenic non-protein coding RNA 2746
NYC_19975	chr11	92939616	92940116	501	*	53.5742	-2.03556	0.491929	-4.13792	3.5e-05	0.00294401	Distal Intergenic	11	92913227	92915644	2418	2	105369431	ENST00000635432.2	-23972	ENSG00000282916	LINC02746	long intergenic non-protein coding RNA 2746
NYC_19976	chr11	92940797	92941297	501	*	46.0168	-1.57045	0.465768	-3.37174	0.000746948	0.0105523	Distal Intergenic	11	92913227	92915644	2418	2	105369431	ENST00000635432.2	-25153	ENSG00000282916	LINC02746	long intergenic non-protein coding RNA 2746
NYC_19977	chr11	92941486	92941986	501	*	60.6263	-1.07138	0.311687	-3.43736	0.000587414	0.00936794	Distal Intergenic	11	92913227	92915644	2418	2	105369431	ENST00000635432.2	-25842	ENSG00000282916	LINC02746	long intergenic non-protein coding RNA 2746
NYC_19978	chr11	92948156	92948656	501	*	53.028	-1.5788	0.527316	-2.99404	0.00275309	0.022211	Distal Intergenic	11	92969651	92982782	13132	1	4544	ENST00000257068.3	-20995	ENSG00000134640	MTNR1B	melatonin receptor 1B
NYC_19979	chr11	92951705	92952205	501	*	43.6288	-1.79804	0.638702	-2.81515	0.00487544	0.0323335	Distal Intergenic	11	92969651	92982782	13132	1	4544	ENST00000257068.3	-17446	ENSG00000134640	MTNR1B	melatonin receptor 1B
NYC_19980	chr11	92953142	92953642	501	*	45.6742	-1.89729	0.512769	-3.70008	0.000215534	0.00599505	Distal Intergenic	11	92969651	92982782	13132	1	4544	ENST00000257068.3	-16009	ENSG00000134640	MTNR1B	melatonin receptor 1B
NYC_19982	chr11	92955769	92956269	501	*	60.6878	-1.0246	0.320788	-3.19402	0.00140305	0.0148441	Distal Intergenic	11	92969651	92982782	13132	1	4544	ENST00000257068.3	-13382	ENSG00000134640	MTNR1B	melatonin receptor 1B
NYC_19983	chr11	92956735	92957235	501	*	30.3162	-1.71524	0.572604	-2.9955	0.00273992	0.0221508	Distal Intergenic	11	92969651	92982782	13132	1	4544	ENST00000257068.3	-12416	ENSG00000134640	MTNR1B	melatonin receptor 1B
NYC_19984	chr11	92957296	92957796	501	*	34.3504	-1.59945	0.543699	-2.94179	0.00326324	0.0247049	Distal Intergenic	11	92969651	92982782	13132	1	4544	ENST00000257068.3	-11855	ENSG00000134640	MTNR1B	melatonin receptor 1B
NYC_19985	chr11	92958172	92958672	501	*	62.0713	-1.81747	0.484088	-3.75441	0.000173749	0.0054828	Distal Intergenic	11	92969651	92982782	13132	1	4544	ENST00000257068.3	-10979	ENSG00000134640	MTNR1B	melatonin receptor 1B
NYC_19988	chr11	92961355	92961855	501	*	47.1429	-1.29002	0.465327	-2.77229	0.00556628	0.0355857	Distal Intergenic	11	92969651	92982782	13132	1	4544	ENST00000257068.3	-7796	ENSG00000134640	MTNR1B	melatonin receptor 1B
NYC_19992	chr11	92963970	92964470	501	*	48.2236	-1.56326	0.40373	-3.87205	0.000107923	0.00450865	Distal Intergenic	11	92969651	92982782	13132	1	4544	ENST00000257068.3	-5181	ENSG00000134640	MTNR1B	melatonin receptor 1B
NYC_19994	chr11	92965413	92965913	501	*	42.7006	-1.56858	0.555085	-2.82583	0.00471584	0.0315655	Exon (ENST00000532770.1/ENST00000532770.1, exon 1 of 2)	11	92969651	92982782	13132	1	4544	ENST00000257068.3	-3738	ENSG00000134640	MTNR1B	melatonin receptor 1B
NYC_19995	chr11	92966727	92967227	501	*	58.6765	-1.50396	0.446989	-3.36466	0.000766392	0.0106975	Promoter (2-3kb)	11	92969651	92982782	13132	1	4544	ENST00000257068.3	-2424	ENSG00000134640	MTNR1B	melatonin receptor 1B
NYC_19996	chr11	92969593	92970093	501	*	71.368	-1.69989	0.414859	-4.09752	4.18e-05	0.00311138	Promoter (<=1kb)	11	92969651	92982782	13132	1	4544	ENST00000257068.3	0	ENSG00000134640	MTNR1B	melatonin receptor 1B
NYC_19997	chr11	92970787	92971287	501	*	43.4553	-1.57282	0.539865	-2.91336	0.00357565	0.0262297	Promoter (1-2kb)	11	92969784	92985066	15283	1	4544	ENST00000528076.1	1003	ENSG00000134640	MTNR1B	melatonin receptor 1B
NYC_19998	chr11	92971563	92972063	501	*	37.9326	-1.61623	0.54929	-2.9424	0.0032568	0.024692	Promoter (1-2kb)	11	92969784	92985066	15283	1	4544	ENST00000528076.1	1779	ENSG00000134640	MTNR1B	melatonin receptor 1B
NYC_20000	chr11	92972804	92973304	501	*	45.4205	-1.60082	0.462854	-3.45858	0.000543036	0.00901304	Intron (ENST00000257068.3/4544, intron 1 of 1)	11	92969784	92985066	15283	1	4544	ENST00000528076.1	3020	ENSG00000134640	MTNR1B	melatonin receptor 1B
NYC_20002	chr11	92974195	92974695	501	*	51.6292	-1.60215	0.539023	-2.97232	0.00295559	0.0232083	Intron (ENST00000257068.3/4544, intron 1 of 1)	11	92969784	92985066	15283	1	4544	ENST00000528076.1	4411	ENSG00000134640	MTNR1B	melatonin receptor 1B
NYC_20003	chr11	92974869	92975369	501	*	50.3593	-1.96926	0.561993	-3.50406	0.000458229	0.00834208	Intron (ENST00000257068.3/4544, intron 1 of 1)	11	92969784	92985066	15283	1	4544	ENST00000528076.1	5085	ENSG00000134640	MTNR1B	melatonin receptor 1B
NYC_20004	chr11	92977569	92978069	501	*	43.4394	-1.8213	0.596094	-3.05539	0.0022477	0.0195618	Intron (ENST00000257068.3/4544, intron 1 of 1)	11	92969784	92985066	15283	1	4544	ENST00000528076.1	7785	ENSG00000134640	MTNR1B	melatonin receptor 1B
NYC_20007	chr11	92979970	92980470	501	*	43.3282	-1.37508	0.51968	-2.64602	0.0081445	0.0469259	Intron (ENST00000257068.3/4544, intron 1 of 1)	11	92969784	92985066	15283	1	4544	ENST00000528076.1	10186	ENSG00000134640	MTNR1B	melatonin receptor 1B
NYC_20008	chr11	92980543	92981043	501	*	45.5174	-1.65238	0.389142	-4.24622	2.17e-05	0.00253572	Intron (ENST00000257068.3/4544, intron 1 of 1)	11	92969784	92985066	15283	1	4544	ENST00000528076.1	10759	ENSG00000134640	MTNR1B	melatonin receptor 1B
NYC_20009	chr11	92981250	92981750	501	*	56.2918	-1.94989	0.462434	-4.21658	2.48e-05	0.00260281	3' UTR	11	92969784	92985066	15283	1	4544	ENST00000528076.1	11466	ENSG00000134640	MTNR1B	melatonin receptor 1B
NYC_20010	chr11	92982203	92982703	501	*	65.6212	-1.65609	0.421741	-3.92678	8.61e-05	0.00410388	3' UTR	11	92969784	92985066	15283	1	4544	ENST00000528076.1	12419	ENSG00000134640	MTNR1B	melatonin receptor 1B
NYC_20011	chr11	92983207	92983707	501	*	54.1104	-2.07621	0.512541	-4.05083	5.1e-05	0.00336533	Intron (ENST00000528076.1/4544, intron 1 of 1)	11	92969784	92985066	15283	1	4544	ENST00000528076.1	13423	ENSG00000134640	MTNR1B	melatonin receptor 1B
NYC_20012	chr11	92984172	92984672	501	*	56.6158	-1.27436	0.402556	-3.16566	0.0015473	0.0156686	Intron (ENST00000528076.1/4544, intron 1 of 1)	11	92969784	92985066	15283	1	4544	ENST00000528076.1	14388	ENSG00000134640	MTNR1B	melatonin receptor 1B
NYC_20013	chr11	92985299	92985799	501	*	51.9939	-1.55775	0.54426	-2.86215	0.00420778	0.0292863	Downstream (<=300bp)	11	92969784	92985066	15283	1	4544	ENST00000528076.1	15515	ENSG00000134640	MTNR1B	melatonin receptor 1B
NYC_20015	chr11	92989217	92989717	501	*	46.8514	-2.19301	0.394937	-5.55282	2.81e-08	0.000125671	Distal Intergenic	11	92969784	92985066	15283	1	4544	ENST00000528076.1	19433	ENSG00000134640	MTNR1B	melatonin receptor 1B
NYC_20017	chr11	92993694	92994194	501	*	37.3919	-1.85542	0.679254	-2.73155	0.00630368	0.0388112	Distal Intergenic	11	92969784	92985066	15283	1	4544	ENST00000528076.1	23910	ENSG00000134640	MTNR1B	melatonin receptor 1B
NYC_20018	chr11	92996165	92996665	501	*	48.1113	-1.63012	0.585664	-2.78337	0.00537981	0.0347097	Distal Intergenic	11	92969784	92985066	15283	1	4544	ENST00000528076.1	26381	ENSG00000134640	MTNR1B	melatonin receptor 1B
NYC_20019	chr11	92999380	92999880	501	*	42.8953	-1.74892	0.641066	-2.72814	0.00636928	0.0391325	Distal Intergenic	11	92969784	92985066	15283	1	4544	ENST00000528076.1	29596	ENSG00000134640	MTNR1B	melatonin receptor 1B
NYC_20023	chr11	93004417	93004917	501	*	47.1983	-2.04839	0.550368	-3.72186	0.00019776	0.00575646	Distal Intergenic	11	92969784	92985066	15283	1	4544	ENST00000528076.1	34633	ENSG00000134640	MTNR1B	melatonin receptor 1B
NYC_20025	chr11	93008395	93008895	501	*	44.9177	-1.71551	0.547998	-3.13051	0.00174505	0.0168472	Distal Intergenic	11	92969784	92985066	15283	1	4544	ENST00000528076.1	38611	ENSG00000134640	MTNR1B	melatonin receptor 1B
NYC_20026	chr11	93009622	93010122	501	*	57.3078	-1.60355	0.548413	-2.92399	0.00345576	0.0256791	Distal Intergenic	11	92969784	92985066	15283	1	4544	ENST00000528076.1	39838	ENSG00000134640	MTNR1B	melatonin receptor 1B
NYC_20027	chr11	93010597	93011097	501	*	45.315	-1.74508	0.501166	-3.48204	0.000497612	0.00863806	Distal Intergenic	11	92969784	92985066	15283	1	4544	ENST00000528076.1	40813	ENSG00000134640	MTNR1B	melatonin receptor 1B
NYC_20029	chr11	93013466	93013966	501	*	43.1221	-1.70008	0.535078	-3.17726	0.00148671	0.0153864	Distal Intergenic	11	92969784	92985066	15283	1	4544	ENST00000528076.1	43682	ENSG00000134640	MTNR1B	melatonin receptor 1B
NYC_20030	chr11	93014290	93014790	501	*	43.0023	-2.6029	0.605505	-4.29872	1.72e-05	0.00228709	Distal Intergenic	11	92969784	92985066	15283	1	4544	ENST00000528076.1	44506	ENSG00000134640	MTNR1B	melatonin receptor 1B
NYC_20031	chr11	93015432	93015932	501	*	48.5915	-1.55034	0.529812	-2.92621	0.00343121	0.0255476	Distal Intergenic	11	92969784	92985066	15283	1	4544	ENST00000528076.1	45648	ENSG00000134640	MTNR1B	melatonin receptor 1B
NYC_20033	chr11	93016928	93017428	501	*	44.7503	-1.52612	0.560458	-2.72298	0.00646959	0.0396015	Distal Intergenic	11	92969784	92985066	15283	1	4544	ENST00000528076.1	47144	ENSG00000134640	MTNR1B	melatonin receptor 1B
NYC_20035	chr11	93019495	93019995	501	*	40.3951	-1.4436	0.551263	-2.61871	0.00882619	0.0497715	Distal Intergenic	11	92969784	92985066	15283	1	4544	ENST00000528076.1	49711	ENSG00000134640	MTNR1B	melatonin receptor 1B
NYC_20037	chr11	93021197	93021697	501	*	62.4932	-1.09564	0.375872	-2.91492	0.0035578	0.0261598	Distal Intergenic	11	92969784	92985066	15283	1	4544	ENST00000528076.1	51413	ENSG00000134640	MTNR1B	melatonin receptor 1B
NYC_20038	chr11	93023935	93024435	501	*	44.2812	-1.80287	0.617868	-2.91789	0.00352403	0.0260102	Distal Intergenic	11	92969784	92985066	15283	1	4544	ENST00000528076.1	54151	ENSG00000134640	MTNR1B	melatonin receptor 1B
NYC_20039	chr11	93024709	93025209	501	*	45.2779	-1.84211	0.558321	-3.29937	0.000969013	0.0120839	Distal Intergenic	11	92969784	92985066	15283	1	4544	ENST00000528076.1	54925	ENSG00000134640	MTNR1B	melatonin receptor 1B
NYC_20041	chr11	93027201	93027701	501	*	44.5536	-2.02423	0.592588	-3.41592	0.000635679	0.00976269	Distal Intergenic	11	92969784	92985066	15283	1	4544	ENST00000528076.1	57417	ENSG00000134640	MTNR1B	melatonin receptor 1B
NYC_20042	chr11	93028195	93028695	501	*	43.8998	-1.51571	0.515666	-2.93932	0.00328937	0.0248489	Distal Intergenic	11	92969784	92985066	15283	1	4544	ENST00000528076.1	58411	ENSG00000134640	MTNR1B	melatonin receptor 1B
NYC_20043	chr11	93028760	93029260	501	*	36.4967	-2.05695	0.451076	-4.5601	5.11e-06	0.00157812	Distal Intergenic	11	92969784	92985066	15283	1	4544	ENST00000528076.1	58976	ENSG00000134640	MTNR1B	melatonin receptor 1B
NYC_20044	chr11	93029941	93030441	501	*	43.2179	-2.00033	0.69761	-2.86741	0.00413847	0.0289562	Distal Intergenic	11	92969784	92985066	15283	1	4544	ENST00000528076.1	60157	ENSG00000134640	MTNR1B	melatonin receptor 1B
NYC_20046	chr11	93032774	93033274	501	*	69.3979	-1.47303	0.377672	-3.9003	9.61e-05	0.0042799	Distal Intergenic	11	92969784	92985066	15283	1	4544	ENST00000528076.1	62990	ENSG00000134640	MTNR1B	melatonin receptor 1B
NYC_20047	chr11	93033834	93034334	501	*	40.0833	-1.82946	0.55307	-3.30782	0.000940264	0.0119263	Distal Intergenic	11	92969784	92985066	15283	1	4544	ENST00000528076.1	64050	ENSG00000134640	MTNR1B	melatonin receptor 1B
NYC_20048	chr11	93034337	93034837	501	*	30.8707	-1.62749	0.57251	-2.84273	0.00447288	0.030531	Distal Intergenic	11	92969784	92985066	15283	1	4544	ENST00000528076.1	64553	ENSG00000134640	MTNR1B	melatonin receptor 1B
NYC_20050	chr11	93036391	93036891	501	*	49.2154	-2.12068	0.609353	-3.48022	0.000500998	0.00865434	Distal Intergenic	11	92969784	92985066	15283	1	4544	ENST00000528076.1	66607	ENSG00000134640	MTNR1B	melatonin receptor 1B
NYC_20051	chr11	93039390	93039890	501	*	54.8679	-1.5897	0.544994	-2.91691	0.00353513	0.0260543	Distal Intergenic	11	92969784	92985066	15283	1	4544	ENST00000528076.1	69606	ENSG00000134640	MTNR1B	melatonin receptor 1B
NYC_20052	chr11	93042813	93043313	501	*	59.8116	-1.99448	0.521191	-3.82677	0.000129838	0.00481847	Distal Intergenic	11	92969784	92985066	15283	1	4544	ENST00000528076.1	73029	ENSG00000134640	MTNR1B	melatonin receptor 1B
NYC_20053	chr11	93047879	93048379	501	*	46.1061	-2.06617	0.665957	-3.10256	0.00191855	0.017794	Distal Intergenic	11	92969784	92985066	15283	1	4544	ENST00000528076.1	78095	ENSG00000134640	MTNR1B	melatonin receptor 1B
NYC_20054	chr11	93048647	93049147	501	*	29.2409	-1.70789	0.626446	-2.72632	0.00640456	0.0392809	Distal Intergenic	11	92969784	92985066	15283	1	4544	ENST00000528076.1	78863	ENSG00000134640	MTNR1B	melatonin receptor 1B
NYC_20055	chr11	93049353	93049853	501	*	42.9915	-1.54493	0.496811	-3.1097	0.00187277	0.0175615	Distal Intergenic	11	92969784	92985066	15283	1	4544	ENST00000528076.1	79569	ENSG00000134640	MTNR1B	melatonin receptor 1B
NYC_20057	chr11	93051777	93052277	501	*	54.888	-1.41097	0.493282	-2.86036	0.00423157	0.029408	Distal Intergenic	11	92969784	92985066	15283	1	4544	ENST00000528076.1	81993	ENSG00000134640	MTNR1B	melatonin receptor 1B
NYC_20058	chr11	93052747	93053247	501	*	52.8554	-2.12315	0.505784	-4.19774	2.7e-05	0.00268718	Exon (ENST00000463604.1/ENST00000463604.1, exon 1 of 1)	11	92969784	92985066	15283	1	4544	ENST00000528076.1	82963	ENSG00000134640	MTNR1B	melatonin receptor 1B
NYC_20059	chr11	93053639	93054139	501	*	42.8363	-1.57971	0.573813	-2.75301	0.00590507	0.0370255	Distal Intergenic	11	92969784	92985066	15283	1	4544	ENST00000528076.1	83855	ENSG00000134640	MTNR1B	melatonin receptor 1B
NYC_20062	chr11	93057161	93057661	501	*	42.8016	-2.27789	0.646611	-3.52282	0.000426989	0.00808182	Distal Intergenic	11	92969784	92985066	15283	1	4544	ENST00000528076.1	87377	ENSG00000134640	MTNR1B	melatonin receptor 1B
NYC_20065	chr11	93060457	93060957	501	*	47.6181	-1.7738	0.530991	-3.34054	0.00083615	0.0112122	Distal Intergenic	11	92969784	92985066	15283	1	4544	ENST00000528076.1	90673	ENSG00000134640	MTNR1B	melatonin receptor 1B
NYC_20066	chr11	93062386	93062886	501	*	39.1327	-2.50524	0.677842	-3.6959	0.000219106	0.00604046	Distal Intergenic	11	92969784	92985066	15283	1	4544	ENST00000528076.1	92602	ENSG00000134640	MTNR1B	melatonin receptor 1B
NYC_20067	chr11	93063037	93063537	501	*	46.9558	-1.68258	0.562837	-2.98947	0.00279464	0.0224265	Distal Intergenic	11	93148148	93155488	7341	2	120103	ENST00000527503.1	91951	ENSG00000180773	SLC36A4	solute carrier family 36 member 4
NYC_20070	chr11	93068085	93068585	501	*	46.1539	-1.79436	0.596318	-3.00907	0.00262048	0.0215263	Distal Intergenic	11	93148148	93155488	7341	2	120103	ENST00000527503.1	86903	ENSG00000180773	SLC36A4	solute carrier family 36 member 4
NYC_20071	chr11	93070967	93071467	501	*	41.2936	-2.70946	0.526873	-5.14252	2.71e-07	0.000409676	Distal Intergenic	11	93148148	93155488	7341	2	120103	ENST00000527503.1	84021	ENSG00000180773	SLC36A4	solute carrier family 36 member 4
NYC_20072	chr11	93072426	93072926	501	*	48.2764	-1.6561	0.63027	-2.62761	0.00859873	0.0489081	Distal Intergenic	11	93148148	93155488	7341	2	120103	ENST00000527503.1	82562	ENSG00000180773	SLC36A4	solute carrier family 36 member 4
NYC_20074	chr11	93073724	93074224	501	*	27.1233	-1.68958	0.630417	-2.6801	0.00736008	0.0435737	Distal Intergenic	11	93148148	93155488	7341	2	120103	ENST00000527503.1	81264	ENSG00000180773	SLC36A4	solute carrier family 36 member 4
NYC_20075	chr11	93074230	93074730	501	*	31.7893	-1.89039	0.543104	-3.48071	0.000500088	0.00865434	Distal Intergenic	11	93148148	93155488	7341	2	120103	ENST00000527503.1	80758	ENSG00000180773	SLC36A4	solute carrier family 36 member 4
NYC_20076	chr11	93074924	93075424	501	*	56.7331	-1.64264	0.45959	-3.57415	0.000351373	0.00743411	Distal Intergenic	11	93148148	93155488	7341	2	120103	ENST00000527503.1	80064	ENSG00000180773	SLC36A4	solute carrier family 36 member 4
NYC_20077	chr11	93077268	93077768	501	*	51.4371	-1.67503	0.561122	-2.98515	0.00283443	0.0226289	Distal Intergenic	11	93148148	93155488	7341	2	120103	ENST00000527503.1	77720	ENSG00000180773	SLC36A4	solute carrier family 36 member 4
NYC_20079	chr11	93079603	93080103	501	*	51.8457	-2.06511	0.444108	-4.65002	3.32e-06	0.00136465	Distal Intergenic	11	93148148	93155488	7341	2	120103	ENST00000527503.1	75385	ENSG00000180773	SLC36A4	solute carrier family 36 member 4
NYC_20080	chr11	93080295	93080795	501	*	50.9771	-1.04578	0.387224	-2.70071	0.00691917	0.0415663	Distal Intergenic	11	93148148	93155488	7341	2	120103	ENST00000527503.1	74693	ENSG00000180773	SLC36A4	solute carrier family 36 member 4
NYC_20081	chr11	93081037	93081537	501	*	36.504	-2.14869	0.721997	-2.97603	0.00292003	0.0230392	Distal Intergenic	11	93148148	93155488	7341	2	120103	ENST00000527503.1	73951	ENSG00000180773	SLC36A4	solute carrier family 36 member 4
NYC_20082	chr11	93081862	93082362	501	*	43.8021	-1.43157	0.525588	-2.72375	0.00645449	0.0395308	Distal Intergenic	11	93148148	93155488	7341	2	120103	ENST00000527503.1	73126	ENSG00000180773	SLC36A4	solute carrier family 36 member 4
NYC_20083	chr11	93082598	93083098	501	*	56.2947	-1.54161	0.46482	-3.31658	0.00091126	0.0117242	Distal Intergenic	11	93148148	93155488	7341	2	120103	ENST00000527503.1	72390	ENSG00000180773	SLC36A4	solute carrier family 36 member 4
NYC_20084	chr11	93083766	93084266	501	*	44.6783	-1.62838	0.557347	-2.92167	0.00348165	0.0258098	Distal Intergenic	11	93148148	93155488	7341	2	120103	ENST00000527503.1	71222	ENSG00000180773	SLC36A4	solute carrier family 36 member 4
NYC_20085	chr11	93085047	93085547	501	*	41.6179	-1.25996	0.45455	-2.77188	0.00557343	0.0356082	Distal Intergenic	11	93148148	93155488	7341	2	120103	ENST00000527503.1	69941	ENSG00000180773	SLC36A4	solute carrier family 36 member 4
NYC_20087	chr11	93088021	93088521	501	*	39.7861	-1.89021	0.62592	-3.01989	0.00252866	0.0210863	Distal Intergenic	11	93148148	93155488	7341	2	120103	ENST00000527503.1	66967	ENSG00000180773	SLC36A4	solute carrier family 36 member 4
NYC_20089	chr11	93090335	93090835	501	*	51.9725	-1.88718	0.543104	-3.4748	0.00051124	0.00874224	Distal Intergenic	11	93148148	93155488	7341	2	120103	ENST00000527503.1	64653	ENSG00000180773	SLC36A4	solute carrier family 36 member 4
NYC_20091	chr11	93096016	93096516	501	*	37.8921	-2.31694	0.665988	-3.47895	0.000503378	0.00867132	Distal Intergenic	11	93148148	93155488	7341	2	120103	ENST00000527503.1	58972	ENSG00000180773	SLC36A4	solute carrier family 36 member 4
NYC_20092	chr11	93097735	93098235	501	*	42.8532	-2.09087	0.689018	-3.03457	0.0024088	0.0204732	Distal Intergenic	11	93148148	93155488	7341	2	120103	ENST00000527503.1	57253	ENSG00000180773	SLC36A4	solute carrier family 36 member 4
NYC_20093	chr11	93099127	93099627	501	*	55.6141	-1.72764	0.407444	-4.24019	2.23e-05	0.00253602	Distal Intergenic	11	93148148	93155488	7341	2	120103	ENST00000527503.1	55861	ENSG00000180773	SLC36A4	solute carrier family 36 member 4
NYC_20094	chr11	93099773	93100273	501	*	64.2481	-1.12579	0.331745	-3.39354	0.000689962	0.0101288	Distal Intergenic	11	93148148	93155488	7341	2	120103	ENST00000527503.1	55215	ENSG00000180773	SLC36A4	solute carrier family 36 member 4
NYC_20095	chr11	93100897	93101397	501	*	52.4269	-1.43739	0.495751	-2.89942	0.0037385	0.0270428	Distal Intergenic	11	93148148	93155488	7341	2	120103	ENST00000527503.1	54091	ENSG00000180773	SLC36A4	solute carrier family 36 member 4
NYC_20096	chr11	93101633	93102133	501	*	42.0695	-1.77025	0.581742	-3.04302	0.00234215	0.0200899	Distal Intergenic	11	93148148	93155488	7341	2	120103	ENST00000527503.1	53355	ENSG00000180773	SLC36A4	solute carrier family 36 member 4
NYC_20097	chr11	93102254	93102754	501	*	45.1897	-1.77115	0.586326	-3.02076	0.00252138	0.0210479	Distal Intergenic	11	93148148	93155488	7341	2	120103	ENST00000527503.1	52734	ENSG00000180773	SLC36A4	solute carrier family 36 member 4
NYC_20098	chr11	93103537	93104037	501	*	51.4881	-1.63102	0.544535	-2.99526	0.00274212	0.0221565	Distal Intergenic	11	93148148	93155488	7341	2	120103	ENST00000527503.1	51451	ENSG00000180773	SLC36A4	solute carrier family 36 member 4
NYC_20099	chr11	93104753	93105253	501	*	51.1831	-2.12315	0.611029	-3.47471	0.000511399	0.00874224	Distal Intergenic	11	93148148	93155488	7341	2	120103	ENST00000527503.1	50235	ENSG00000180773	SLC36A4	solute carrier family 36 member 4
NYC_20100	chr11	93105902	93106402	501	*	60.031	-1.56983	0.47586	-3.29893	0.000970537	0.0120921	Distal Intergenic	11	93148148	93155488	7341	2	120103	ENST00000527503.1	49086	ENSG00000180773	SLC36A4	solute carrier family 36 member 4
NYC_20101	chr11	93106957	93107457	501	*	46.8267	-1.66096	0.539256	-3.0801	0.00206933	0.0186235	Distal Intergenic	11	93148148	93155488	7341	2	120103	ENST00000527503.1	48031	ENSG00000180773	SLC36A4	solute carrier family 36 member 4
NYC_20102	chr11	93109460	93109960	501	*	40.7315	-1.83303	0.562004	-3.2616	0.00110784	0.0129623	Distal Intergenic	11	93148148	93155488	7341	2	120103	ENST00000527503.1	45528	ENSG00000180773	SLC36A4	solute carrier family 36 member 4
NYC_20103	chr11	93110027	93110527	501	*	45.1364	-1.47554	0.487336	-3.02776	0.00246374	0.0207303	Distal Intergenic	11	93148148	93155488	7341	2	120103	ENST00000527503.1	44961	ENSG00000180773	SLC36A4	solute carrier family 36 member 4
NYC_20104	chr11	93110625	93111125	501	*	39.5298	-1.94611	0.58003	-3.35518	0.000793132	0.0109163	Distal Intergenic	11	93148148	93155488	7341	2	120103	ENST00000527503.1	44363	ENSG00000180773	SLC36A4	solute carrier family 36 member 4
NYC_20105	chr11	93113062	93113562	501	*	58.3604	-1.80202	0.492002	-3.66263	0.000249635	0.00642358	Distal Intergenic	11	93148148	93155488	7341	2	120103	ENST00000527503.1	41926	ENSG00000180773	SLC36A4	solute carrier family 36 member 4
NYC_20106	chr11	93114165	93114665	501	*	62.066	-1.41464	0.374983	-3.77255	0.000161586	0.00528177	Distal Intergenic	11	93148148	93155488	7341	2	120103	ENST00000527503.1	40823	ENSG00000180773	SLC36A4	solute carrier family 36 member 4
NYC_20107	chr11	93115241	93115741	501	*	45.584	-1.74384	0.501359	-3.47822	0.00050475	0.00868701	Distal Intergenic	11	93148148	93155488	7341	2	120103	ENST00000527503.1	39747	ENSG00000180773	SLC36A4	solute carrier family 36 member 4
NYC_20108	chr11	93116427	93116927	501	*	58.8857	-1.30799	0.432073	-3.02725	0.00246786	0.0207481	Distal Intergenic	11	93148148	93155488	7341	2	120103	ENST00000527503.1	38561	ENSG00000180773	SLC36A4	solute carrier family 36 member 4
NYC_20109	chr11	93117652	93118152	501	*	49.7	-1.73823	0.465649	-3.73292	0.000189275	0.00565473	Distal Intergenic	11	93148148	93155488	7341	2	120103	ENST00000527503.1	37336	ENSG00000180773	SLC36A4	solute carrier family 36 member 4
NYC_20110	chr11	93118435	93118935	501	*	50.3199	-1.78839	0.520013	-3.43913	0.000583586	0.00933688	Distal Intergenic	11	93148148	93155488	7341	2	120103	ENST00000527503.1	36553	ENSG00000180773	SLC36A4	solute carrier family 36 member 4
NYC_20111	chr11	93119489	93119989	501	*	54.1319	-1.69237	0.539265	-3.13828	0.00169941	0.0165263	Distal Intergenic	11	93148148	93155488	7341	2	120103	ENST00000527503.1	35499	ENSG00000180773	SLC36A4	solute carrier family 36 member 4
NYC_20112	chr11	93120421	93120921	501	*	41.5257	-1.77051	0.661591	-2.67614	0.00744763	0.0439385	Distal Intergenic	11	93148148	93155488	7341	2	120103	ENST00000527503.1	34567	ENSG00000180773	SLC36A4	solute carrier family 36 member 4
NYC_20113	chr11	93127930	93128430	501	*	40.0271	-1.96986	0.567503	-3.47111	0.00051832	0.00881245	Distal Intergenic	11	93148148	93155488	7341	2	120103	ENST00000527503.1	27058	ENSG00000180773	SLC36A4	solute carrier family 36 member 4
NYC_20114	chr11	93129339	93129839	501	*	42.4318	-1.62638	0.459518	-3.53932	0.000401161	0.00784776	Distal Intergenic	11	93148148	93155488	7341	2	120103	ENST00000527503.1	25649	ENSG00000180773	SLC36A4	solute carrier family 36 member 4
NYC_20115	chr11	93130263	93130763	501	*	36.7314	-1.95539	0.690025	-2.8338	0.00459978	0.0310523	Distal Intergenic	11	93148148	93155488	7341	2	120103	ENST00000527503.1	24725	ENSG00000180773	SLC36A4	solute carrier family 36 member 4
NYC_20116	chr11	93130837	93131337	501	*	33.5093	-1.80893	0.61996	-2.91782	0.00352492	0.026012	Distal Intergenic	11	93148148	93155488	7341	2	120103	ENST00000527503.1	24151	ENSG00000180773	SLC36A4	solute carrier family 36 member 4
NYC_20117	chr11	93132357	93132857	501	*	53.1108	-1.68513	0.449888	-3.74566	0.000179923	0.00554312	Distal Intergenic	11	93148148	93155488	7341	2	120103	ENST00000527503.1	22631	ENSG00000180773	SLC36A4	solute carrier family 36 member 4
NYC_20118	chr11	93133115	93133615	501	*	46.3476	-1.8638	0.537033	-3.47056	0.000519379	0.00881923	Distal Intergenic	11	93148148	93155488	7341	2	120103	ENST00000527503.1	21873	ENSG00000180773	SLC36A4	solute carrier family 36 member 4
NYC_20119	chr11	93134566	93135066	501	*	49.0989	-1.77825	0.602577	-2.95108	0.00316666	0.0242662	Distal Intergenic	11	93148148	93155488	7341	2	120103	ENST00000527503.1	20422	ENSG00000180773	SLC36A4	solute carrier family 36 member 4
NYC_20120	chr11	93144808	93145308	501	*	39.3533	-2.47005	0.685913	-3.60111	0.000316862	0.00711565	3' UTR	11	93148148	93155488	7341	2	120103	ENST00000527503.1	10180	ENSG00000180773	SLC36A4	solute carrier family 36 member 4
NYC_20122	chr11	93150495	93150995	501	*	41.1846	-2.27752	0.815861	-2.79155	0.00524555	0.0341049	Intron (ENST00000326402.9/120103, intron 10 of 10)	11	93148148	93155488	7341	2	120103	ENST00000527503.1	4493	ENSG00000180773	SLC36A4	solute carrier family 36 member 4
NYC_20123	chr11	93156137	93156637	501	*	42.4016	-2.0332	0.680925	-2.98594	0.00282706	0.0225765	Promoter (<=1kb)	11	93148148	93155488	7341	2	120103	ENST00000527503.1	-649	ENSG00000180773	SLC36A4	solute carrier family 36 member 4
NYC_20124	chr11	93156794	93157294	501	*	40.2951	-1.80618	0.630156	-2.86625	0.00415367	0.0290253	Promoter (1-2kb)	11	93148148	93155488	7341	2	120103	ENST00000527503.1	-1306	ENSG00000180773	SLC36A4	solute carrier family 36 member 4
NYC_20125	chr11	93159543	93160043	501	*	45.1692	-2.33834	0.532396	-4.39211	1.12e-05	0.00198643	Intron (ENST00000326402.9/120103, intron 9 of 10)	11	93148148	93155488	7341	2	120103	ENST00000527503.1	-4055	ENSG00000180773	SLC36A4	solute carrier family 36 member 4
NYC_20126	chr11	93160370	93160870	501	*	40.9686	-1.80633	0.410962	-4.39538	1.11e-05	0.00197586	Intron (ENST00000326402.9/120103, intron 9 of 10)	11	93148148	93155488	7341	2	120103	ENST00000527503.1	-4882	ENSG00000180773	SLC36A4	solute carrier family 36 member 4
NYC_20128	chr11	93171722	93172222	501	*	27.2766	-2.22057	0.656076	-3.38462	0.000712756	0.0102932	Exon (ENST00000623872.1/ENST00000623872.1, exon 1 of 1)	11	93153964	93167530	13567	2	120103	ENST00000526735.1	-4192	ENSG00000180773	SLC36A4	solute carrier family 36 member 4
NYC_20129	chr11	93177903	93178403	501	*	55.6528	-1.68034	0.517616	-3.24632	0.00116909	0.0133767	Intron (ENST00000326402.9/120103, intron 6 of 10)	11	93154157	93182894	28738	2	120103	ENST00000534116.1	4491	ENSG00000180773	SLC36A4	solute carrier family 36 member 4
NYC_20130	chr11	93179023	93179523	501	*	48.9558	-2.05016	0.605999	-3.38311	0.000716702	0.0103173	Intron (ENST00000326402.9/120103, intron 6 of 10)	11	93154157	93182894	28738	2	120103	ENST00000534116.1	3371	ENSG00000180773	SLC36A4	solute carrier family 36 member 4
NYC_20131	chr11	93186744	93187244	501	*	39.5879	-1.80201	0.601251	-2.9971	0.00272557	0.022059	Intron (ENST00000326402.9/120103, intron 1 of 10)	11	93154157	93182894	28738	2	120103	ENST00000534116.1	-3850	ENSG00000180773	SLC36A4	solute carrier family 36 member 4
NYC_20132	chr11	93188386	93188886	501	*	29.7177	-1.79285	0.519186	-3.45319	0.000553994	0.00910768	Intron (ENST00000326402.9/120103, intron 1 of 10)	11	93154157	93182894	28738	2	120103	ENST00000534116.1	-5492	ENSG00000180773	SLC36A4	solute carrier family 36 member 4
NYC_20133	chr11	93188943	93189443	501	*	38.8902	-1.75465	0.668306	-2.62552	0.00865162	0.0490791	Intron (ENST00000326402.9/120103, intron 1 of 10)	11	93154157	93182894	28738	2	120103	ENST00000534116.1	-6049	ENSG00000180773	SLC36A4	solute carrier family 36 member 4
NYC_20134	chr11	93192122	93192622	501	*	41.4914	-1.79474	0.670359	-2.67728	0.00742227	0.0438398	Intron (ENST00000326402.9/120103, intron 1 of 10)	11	93148315	93197455	49141	2	120103	ENST00000529184.5	4833	ENSG00000180773	SLC36A4	solute carrier family 36 member 4
NYC_20135	chr11	93195140	93195640	501	*	42.3395	-1.72782	0.563797	-3.06462	0.00217947	0.019189	Promoter (1-2kb)	11	93148315	93197455	49141	2	120103	ENST00000529184.5	1815	ENSG00000180773	SLC36A4	solute carrier family 36 member 4
NYC_20139	chr11	93199946	93200446	501	*	56.3798	-1.77505	0.532917	-3.33082	0.000865908	0.0114267	Promoter (1-2kb)	11	93144174	93197991	53818	2	120103	ENST00000326402.9	-1955	ENSG00000180773	SLC36A4	solute carrier family 36 member 4
NYC_20140	chr11	93200788	93201288	501	*	43.8504	-2.15791	0.62703	-3.44148	0.000578533	0.00930127	Promoter (2-3kb)	11	93144174	93197991	53818	2	120103	ENST00000326402.9	-2797	ENSG00000180773	SLC36A4	solute carrier family 36 member 4
NYC_20141	chr11	93201959	93202459	501	*	36.7644	-2.28912	0.700533	-3.26769	0.00108431	0.012786	Distal Intergenic	11	93144174	93197991	53818	2	120103	ENST00000326402.9	-3968	ENSG00000180773	SLC36A4	solute carrier family 36 member 4
NYC_20142	chr11	93204767	93205267	501	*	54.3032	-1.6662	0.409753	-4.06635	4.78e-05	0.00328454	Distal Intergenic	11	93144174	93197991	53818	2	120103	ENST00000326402.9	-6776	ENSG00000180773	SLC36A4	solute carrier family 36 member 4
NYC_20143	chr11	93205457	93205957	501	*	42.7846	-1.89902	0.684015	-2.77629	0.00549833	0.0352661	Distal Intergenic	11	93144174	93197991	53818	2	120103	ENST00000326402.9	-7466	ENSG00000180773	SLC36A4	solute carrier family 36 member 4
NYC_20145	chr11	93209623	93210123	501	*	48.2467	-1.66864	0.461774	-3.61355	0.000302034	0.006953	Distal Intergenic	11	93221486	93221630	145	2	112268080	ENST00000531740.1	11507	NA	LOC112268080	6.8 kDa mitochondrial proteolipid-like
NYC_20146	chr11	93212522	93213022	501	*	57.6623	-2.04369	0.458439	-4.45794	8.28e-06	0.00183933	Distal Intergenic	11	93221486	93221630	145	2	112268080	ENST00000531740.1	8608	NA	LOC112268080	6.8 kDa mitochondrial proteolipid-like
NYC_20147	chr11	93215649	93216149	501	*	57.4551	-1.79719	0.481738	-3.73064	0.000190997	0.00568385	Distal Intergenic	11	93221486	93221630	145	2	112268080	ENST00000531740.1	5481	NA	LOC112268080	6.8 kDa mitochondrial proteolipid-like
NYC_20148	chr11	93216654	93217154	501	*	52.4827	-1.5403	0.447709	-3.44041	0.000580831	0.00932384	Distal Intergenic	11	93221486	93221630	145	2	112268080	ENST00000531740.1	4476	NA	LOC112268080	6.8 kDa mitochondrial proteolipid-like
NYC_20149	chr11	93217939	93218439	501	*	51.6616	-2.02185	0.451202	-4.48104	7.43e-06	0.00178055	Distal Intergenic	11	93221486	93221630	145	2	112268080	ENST00000531740.1	3191	NA	LOC112268080	6.8 kDa mitochondrial proteolipid-like
NYC_20150	chr11	93219088	93219588	501	*	45.2449	-1.45361	0.486367	-2.9887	0.00280163	0.0224472	Promoter (2-3kb)	11	93221486	93221630	145	2	112268080	ENST00000531740.1	2042	NA	LOC112268080	6.8 kDa mitochondrial proteolipid-like
NYC_20151	chr11	93219662	93220162	501	*	36.8441	-1.5236	0.485924	-3.13547	0.00171578	0.0166536	Promoter (1-2kb)	11	93221486	93221630	145	2	112268080	ENST00000531740.1	1468	NA	LOC112268080	6.8 kDa mitochondrial proteolipid-like
NYC_20152	chr11	93220284	93220784	501	*	36.2223	-2.01102	0.498934	-4.03063	5.56e-05	0.00347548	Promoter (<=1kb)	11	93221486	93221630	145	2	112268080	ENST00000531740.1	846	NA	LOC112268080	6.8 kDa mitochondrial proteolipid-like
NYC_20153	chr11	93220922	93221422	501	*	34.555	-1.60672	0.535565	-3.00005	0.00269935	0.0219389	Promoter (<=1kb)	11	93221486	93221630	145	2	112268080	ENST00000531740.1	208	NA	LOC112268080	6.8 kDa mitochondrial proteolipid-like
NYC_20154	chr11	93221491	93221991	501	*	43.2228	-1.23849	0.408152	-3.03438	0.00241033	0.0204737	Promoter (<=1kb)	11	93221486	93221630	145	2	112268080	ENST00000531740.1	0	NA	LOC112268080	6.8 kDa mitochondrial proteolipid-like
NYC_20155	chr11	93222159	93222659	501	*	37.2093	-2.45669	0.567118	-4.33189	1.48e-05	0.00215832	Promoter (<=1kb)	11	93221486	93221630	145	2	112268080	ENST00000531740.1	-529	NA	LOC112268080	6.8 kDa mitochondrial proteolipid-like
NYC_20156	chr11	93224007	93224507	501	*	51.0005	-2.09554	0.694611	-3.01686	0.0025541	0.0212023	Promoter (2-3kb)	11	93221486	93221630	145	2	112268080	ENST00000531740.1	-2377	NA	LOC112268080	6.8 kDa mitochondrial proteolipid-like
NYC_20157	chr11	93224919	93225419	501	*	47.7224	-1.41918	0.4507	-3.14883	0.00163924	0.0161604	Distal Intergenic	11	93221486	93221630	145	2	112268080	ENST00000531740.1	-3289	NA	LOC112268080	6.8 kDa mitochondrial proteolipid-like
NYC_20159	chr11	93227411	93227911	501	*	54.6558	-1.32263	0.479415	-2.75885	0.00580055	0.0365959	Distal Intergenic	11	93221486	93221630	145	2	112268080	ENST00000531740.1	-5781	NA	LOC112268080	6.8 kDa mitochondrial proteolipid-like
NYC_20160	chr11	93228390	93228890	501	*	41.2878	-2.061	0.528554	-3.89932	9.65e-05	0.00428089	Distal Intergenic	11	93221486	93221630	145	2	112268080	ENST00000531740.1	-6760	NA	LOC112268080	6.8 kDa mitochondrial proteolipid-like
NYC_20161	chr11	93232136	93232636	501	*	56.955	-1.6917	0.445659	-3.79595	0.000147078	0.0051028	Distal Intergenic	11	93221486	93221630	145	2	112268080	ENST00000531740.1	-10506	NA	LOC112268080	6.8 kDa mitochondrial proteolipid-like
NYC_20162	chr11	93232998	93233498	501	*	50.2935	-1.34207	0.479689	-2.79779	0.00514541	0.0336274	Distal Intergenic	11	93221486	93221630	145	2	112268080	ENST00000531740.1	-11368	NA	LOC112268080	6.8 kDa mitochondrial proteolipid-like
NYC_20164	chr11	93235578	93236078	501	*	60.0305	-1.63558	0.475063	-3.44288	0.000575558	0.00927746	Distal Intergenic	11	93221486	93221630	145	2	112268080	ENST00000531740.1	-13948	NA	LOC112268080	6.8 kDa mitochondrial proteolipid-like
NYC_20166	chr11	93238427	93238927	501	*	46.0564	-1.8014	0.608115	-2.96227	0.00305378	0.0236934	Distal Intergenic	11	93221486	93221630	145	2	112268080	ENST00000531740.1	-16797	NA	LOC112268080	6.8 kDa mitochondrial proteolipid-like
NYC_20167	chr11	93239139	93239639	501	*	46.4385	-1.67092	0.444216	-3.7615	0.000168897	0.00538131	Distal Intergenic	11	93221486	93221630	145	2	112268080	ENST00000531740.1	-17509	NA	LOC112268080	6.8 kDa mitochondrial proteolipid-like
NYC_20168	chr11	93239915	93240415	501	*	35.035	-2.08854	0.713348	-2.92781	0.00341362	0.025471	Exon (ENST00000531846.1/ENST00000531846.1, exon 1 of 2)	11	93221486	93221630	145	2	112268080	ENST00000531740.1	-18285	NA	LOC112268080	6.8 kDa mitochondrial proteolipid-like
NYC_20169	chr11	93249104	93249604	501	*	49.3037	-1.70086	0.487302	-3.49036	0.000482373	0.00850878	Distal Intergenic	11	93221486	93221630	145	2	112268080	ENST00000531740.1	-27474	NA	LOC112268080	6.8 kDa mitochondrial proteolipid-like
NYC_20170	chr11	93249752	93250252	501	*	35.262	-2.10384	0.677424	-3.10564	0.00189868	0.0176889	Distal Intergenic	11	93221486	93221630	145	2	112268080	ENST00000531740.1	-28122	NA	LOC112268080	6.8 kDa mitochondrial proteolipid-like
NYC_20171	chr11	93251525	93252025	501	*	56.0325	-1.84247	0.522591	-3.52564	0.000422467	0.00804601	Distal Intergenic	11	93221486	93221630	145	2	112268080	ENST00000531740.1	-29895	NA	LOC112268080	6.8 kDa mitochondrial proteolipid-like
NYC_20172	chr11	93252904	93253404	501	*	25.4745	-2.17452	0.818269	-2.65747	0.00787307	0.0458057	Distal Intergenic	11	93221486	93221630	145	2	112268080	ENST00000531740.1	-31274	NA	LOC112268080	6.8 kDa mitochondrial proteolipid-like
NYC_20173	chr11	93253405	93253905	501	*	25.0247	-1.78891	0.637913	-2.80432	0.00504223	0.0331506	Distal Intergenic	11	93221486	93221630	145	2	112268080	ENST00000531740.1	-31775	NA	LOC112268080	6.8 kDa mitochondrial proteolipid-like
NYC_20174	chr11	93255037	93255537	501	*	46.2135	-1.98553	0.709559	-2.79825	0.00513796	0.0335983	Distal Intergenic	11	93221486	93221630	145	2	112268080	ENST00000531740.1	-33407	NA	LOC112268080	6.8 kDa mitochondrial proteolipid-like
NYC_20175	chr11	93256528	93257028	501	*	43.9649	-2.09803	0.549567	-3.8176	0.000134758	0.00490612	Distal Intergenic	11	93221486	93221630	145	2	112268080	ENST00000531740.1	-34898	NA	LOC112268080	6.8 kDa mitochondrial proteolipid-like
NYC_20176	chr11	93257852	93258352	501	*	38.6015	-2.21518	0.657224	-3.37051	0.000750301	0.0105786	Distal Intergenic	11	93221486	93221630	145	2	112268080	ENST00000531740.1	-36222	NA	LOC112268080	6.8 kDa mitochondrial proteolipid-like
NYC_20177	chr11	93260953	93261453	501	*	43.5414	-1.58532	0.602112	-2.63294	0.00846499	0.0482504	Distal Intergenic	11	93221486	93221630	145	2	112268080	ENST00000531740.1	-39323	NA	LOC112268080	6.8 kDa mitochondrial proteolipid-like
NYC_20178	chr11	93263401	93263901	501	*	36.8765	-1.73962	0.565463	-3.07645	0.0020948	0.0187296	Distal Intergenic	11	93221486	93221630	145	2	112268080	ENST00000531740.1	-41771	NA	LOC112268080	6.8 kDa mitochondrial proteolipid-like
NYC_20179	chr11	93264015	93264515	501	*	35.8465	-1.64771	0.626278	-2.63095	0.00851463	0.0484938	Distal Intergenic	11	93221486	93221630	145	2	112268080	ENST00000531740.1	-42385	NA	LOC112268080	6.8 kDa mitochondrial proteolipid-like
NYC_20180	chr11	93265973	93266473	501	*	46.886	-2.14173	0.644469	-3.32324	0.000889771	0.0115705	Distal Intergenic	11	93221486	93221630	145	2	112268080	ENST00000531740.1	-44343	NA	LOC112268080	6.8 kDa mitochondrial proteolipid-like
NYC_20181	chr11	93267264	93267764	501	*	57.0077	-1.31381	0.408287	-3.21786	0.00129151	0.0141312	Distal Intergenic	11	93221486	93221630	145	2	112268080	ENST00000531740.1	-45634	NA	LOC112268080	6.8 kDa mitochondrial proteolipid-like
NYC_20182	chr11	93268225	93268725	501	*	36.7944	-1.42722	0.450241	-3.16991	0.00152489	0.0155483	Distal Intergenic	11	93221486	93221630	145	2	112268080	ENST00000531740.1	-46595	NA	LOC112268080	6.8 kDa mitochondrial proteolipid-like
NYC_20184	chr11	93269959	93270459	501	*	45.0714	-2.0862	0.57057	-3.65634	0.00025584	0.00649674	Distal Intergenic	11	93221486	93221630	145	2	112268080	ENST00000531740.1	-48329	NA	LOC112268080	6.8 kDa mitochondrial proteolipid-like
NYC_20185	chr11	93270776	93271276	501	*	44.5225	-1.76418	0.548427	-3.2168	0.00129628	0.0141626	Distal Intergenic	11	93221486	93221630	145	2	112268080	ENST00000531740.1	-49146	NA	LOC112268080	6.8 kDa mitochondrial proteolipid-like
NYC_20186	chr11	93271587	93272087	501	*	43.8738	-1.78574	0.513224	-3.47946	0.000502429	0.00866352	Distal Intergenic	11	93221486	93221630	145	2	112268080	ENST00000531740.1	-49957	NA	LOC112268080	6.8 kDa mitochondrial proteolipid-like
NYC_20187	chr11	93273271	93273771	501	*	48.3961	-1.67581	0.478009	-3.50581	0.000455227	0.00832923	Distal Intergenic	11	93221486	93221630	145	2	112268080	ENST00000531740.1	-51641	NA	LOC112268080	6.8 kDa mitochondrial proteolipid-like
NYC_20188	chr11	93275667	93276167	501	*	58.851	-1.56459	0.412357	-3.79427	0.000148079	0.00510804	Distal Intergenic	11	93329971	93437702	107732	1	159989	ENST00000618031.4	-53804	ENSG00000165325	DEUP1	deuterosome assembly protein 1
NYC_20189	chr11	93278236	93278736	501	*	43.4234	-1.95537	0.596515	-3.27799	0.00104548	0.0125831	Distal Intergenic	11	93329971	93437702	107732	1	159989	ENST00000618031.4	-51235	ENSG00000165325	DEUP1	deuterosome assembly protein 1
NYC_20190	chr11	93280001	93280501	501	*	50.593	-1.90129	0.478588	-3.97271	7.11e-05	0.00384645	Distal Intergenic	11	93329971	93437702	107732	1	159989	ENST00000618031.4	-49470	ENSG00000165325	DEUP1	deuterosome assembly protein 1
NYC_20191	chr11	93280801	93281301	501	*	43.9106	-1.85877	0.554902	-3.34972	0.000808939	0.0110225	Distal Intergenic	11	93329971	93437702	107732	1	159989	ENST00000618031.4	-48670	ENSG00000165325	DEUP1	deuterosome assembly protein 1
NYC_20192	chr11	93281453	93281953	501	*	41.3471	-2.31868	0.70221	-3.30198	0.000960039	0.0120391	Distal Intergenic	11	93329971	93437702	107732	1	159989	ENST00000618031.4	-48018	ENSG00000165325	DEUP1	deuterosome assembly protein 1
NYC_20193	chr11	93285307	93285807	501	*	50.2583	-1.69815	0.511626	-3.31911	0.000903035	0.0116702	Distal Intergenic	11	93329971	93437702	107732	1	159989	ENST00000618031.4	-44164	ENSG00000165325	DEUP1	deuterosome assembly protein 1
NYC_20194	chr11	93287314	93287814	501	*	47.7049	-1.29282	0.403838	-3.20133	0.00136797	0.0146118	Exon (ENST00000623739.1/ENST00000623739.1, exon 1 of 1)	11	93329971	93437702	107732	1	159989	ENST00000618031.4	-42157	ENSG00000165325	DEUP1	deuterosome assembly protein 1
NYC_20195	chr11	93287956	93288456	501	*	48.7289	-1.05823	0.327258	-3.23362	0.00122234	0.0137111	Exon (ENST00000623739.1/ENST00000623739.1, exon 1 of 1)	11	93329971	93437702	107732	1	159989	ENST00000618031.4	-41515	ENSG00000165325	DEUP1	deuterosome assembly protein 1
NYC_20196	chr11	93288737	93289237	501	*	52.918	-2.08772	0.60654	-3.44202	0.00057739	0.00929626	Exon (ENST00000623739.1/ENST00000623739.1, exon 1 of 1)	11	93329971	93437702	107732	1	159989	ENST00000618031.4	-40734	ENSG00000165325	DEUP1	deuterosome assembly protein 1
NYC_20197	chr11	93294542	93295042	501	*	47.7536	-2.01966	0.523437	-3.85846	0.000114104	0.00459252	Distal Intergenic	11	93329971	93437702	107732	1	159989	ENST00000618031.4	-34929	ENSG00000165325	DEUP1	deuterosome assembly protein 1
NYC_20198	chr11	93295829	93296329	501	*	38.4151	-1.7255	0.598026	-2.88533	0.00391006	0.0278911	Distal Intergenic	11	93329971	93437702	107732	1	159989	ENST00000618031.4	-33642	ENSG00000165325	DEUP1	deuterosome assembly protein 1
NYC_20199	chr11	93297144	93297644	501	*	62.8553	-1.75568	0.48838	-3.5949	0.000324513	0.00719776	Distal Intergenic	11	93329971	93437702	107732	1	159989	ENST00000618031.4	-32327	ENSG00000165325	DEUP1	deuterosome assembly protein 1
NYC_20200	chr11	93299599	93300099	501	*	49.1081	-1.7804	0.627764	-2.8361	0.00456678	0.0309266	Distal Intergenic	11	93329971	93437702	107732	1	159989	ENST00000618031.4	-29872	ENSG00000165325	DEUP1	deuterosome assembly protein 1
NYC_20201	chr11	93302884	93303384	501	*	56.8465	-1.7204	0.461589	-3.72713	0.000193674	0.00571489	Distal Intergenic	11	93329971	93437702	107732	1	159989	ENST00000618031.4	-26587	ENSG00000165325	DEUP1	deuterosome assembly protein 1
NYC_20202	chr11	93303512	93304012	501	*	68.0409	-1.66018	0.455489	-3.64484	0.000267561	0.00659415	Distal Intergenic	11	93329971	93437702	107732	1	159989	ENST00000618031.4	-25959	ENSG00000165325	DEUP1	deuterosome assembly protein 1
NYC_20203	chr11	93308593	93309093	501	*	39.4603	-2.30088	0.635157	-3.62254	0.00029173	0.00685118	Distal Intergenic	11	93329971	93437702	107732	1	159989	ENST00000618031.4	-20878	ENSG00000165325	DEUP1	deuterosome assembly protein 1
NYC_20204	chr11	93313117	93313617	501	*	57.2855	-1.92703	0.491721	-3.91895	8.89e-05	0.00414302	Distal Intergenic	11	93329971	93437702	107732	1	159989	ENST00000618031.4	-16354	ENSG00000165325	DEUP1	deuterosome assembly protein 1
NYC_20205	chr11	93314627	93315127	501	*	40.8842	-2.00065	0.561885	-3.5606	0.000370003	0.00761696	Distal Intergenic	11	93329971	93437702	107732	1	159989	ENST00000618031.4	-14844	ENSG00000165325	DEUP1	deuterosome assembly protein 1
NYC_20206	chr11	93317942	93318442	501	*	54.5567	-1.82317	0.4999	-3.64708	0.000265237	0.00657666	Distal Intergenic	11	93329971	93437702	107732	1	159989	ENST00000618031.4	-11529	ENSG00000165325	DEUP1	deuterosome assembly protein 1
NYC_20207	chr11	93318763	93319263	501	*	41.0916	-2.09585	0.700231	-2.99308	0.00276174	0.0222551	Distal Intergenic	11	93329971	93437702	107732	1	159989	ENST00000618031.4	-10708	ENSG00000165325	DEUP1	deuterosome assembly protein 1
NYC_20208	chr11	93319960	93320460	501	*	38.8978	-1.91626	0.627583	-3.0534	0.00226266	0.0196309	Distal Intergenic	11	93329971	93437702	107732	1	159989	ENST00000618031.4	-9511	ENSG00000165325	DEUP1	deuterosome assembly protein 1
NYC_20211	chr11	93324314	93324814	501	*	34.9191	-1.75465	0.648189	-2.70701	0.00678925	0.0410327	Distal Intergenic	11	93329971	93437702	107732	1	159989	ENST00000618031.4	-5157	ENSG00000165325	DEUP1	deuterosome assembly protein 1
NYC_20212	chr11	93326895	93327395	501	*	35.0037	-2.10968	0.650037	-3.24548	0.00117255	0.0134008	Promoter (2-3kb)	11	93329971	93437702	107732	1	159989	ENST00000618031.4	-2576	ENSG00000165325	DEUP1	deuterosome assembly protein 1
NYC_20213	chr11	93327635	93328135	501	*	36.0979	-1.94819	0.537186	-3.62665	0.000287127	0.00680682	Promoter (1-2kb)	11	93329971	93437702	107732	1	159989	ENST00000618031.4	-1836	ENSG00000165325	DEUP1	deuterosome assembly protein 1
NYC_20214	chr11	93329824	93330324	501	*	41.0075	-2.006	0.543611	-3.69013	0.000224137	0.00612963	Promoter (<=1kb)	11	93329971	93437702	107732	1	159989	ENST00000618031.4	0	ENSG00000165325	DEUP1	deuterosome assembly protein 1
NYC_20215	chr11	93330651	93331151	501	*	62.3188	-1.39356	0.505667	-2.75588	0.00585337	0.0368416	Promoter (<=1kb)	11	93330742	93438470	107729	1	159989	ENST00000298050.9	0	ENSG00000165325	DEUP1	deuterosome assembly protein 1
NYC_20217	chr11	93333106	93333606	501	*	49.0391	-1.65826	0.540579	-3.06756	0.00215812	0.0190661	Promoter (<=1kb)	11	93332222	93357475	25254	1	159989	ENST00000527307.2	884	ENSG00000165325	DEUP1	deuterosome assembly protein 1
NYC_20218	chr11	93333887	93334387	501	*	48.8964	-1.4675	0.48755	-3.00994	0.00261298	0.0214836	Promoter (1-2kb)	11	93332222	93357475	25254	1	159989	ENST00000527307.2	1665	ENSG00000165325	DEUP1	deuterosome assembly protein 1
NYC_20219	chr11	93335357	93335857	501	*	32.4277	-2.00294	0.711275	-2.81598	0.00486287	0.0322865	Intron (ENST00000618031.4/159989, intron 2 of 13)	11	93332222	93357475	25254	1	159989	ENST00000527307.2	3135	ENSG00000165325	DEUP1	deuterosome assembly protein 1
NYC_20220	chr11	93337724	93338224	501	*	48.252	-1.98253	0.613663	-3.23065	0.00123509	0.0137749	Intron (ENST00000618031.4/159989, intron 2 of 13)	11	93332222	93357475	25254	1	159989	ENST00000527307.2	5502	ENSG00000165325	DEUP1	deuterosome assembly protein 1
NYC_20221	chr11	93338755	93339255	501	*	45.1505	-2.29068	0.593783	-3.85778	0.000114421	0.00459252	Intron (ENST00000618031.4/159989, intron 2 of 13)	11	93332222	93357475	25254	1	159989	ENST00000527307.2	6533	ENSG00000165325	DEUP1	deuterosome assembly protein 1
NYC_20222	chr11	93339538	93340038	501	*	52.0526	-1.79533	0.506621	-3.54373	0.000394503	0.00780924	Intron (ENST00000618031.4/159989, intron 2 of 13)	11	93332222	93357475	25254	1	159989	ENST00000527307.2	7316	ENSG00000165325	DEUP1	deuterosome assembly protein 1
NYC_20223	chr11	93341316	93341816	501	*	55.4442	-1.59608	0.366222	-4.35824	1.31e-05	0.00208991	Intron (ENST00000618031.4/159989, intron 2 of 13)	11	93332222	93357475	25254	1	159989	ENST00000527307.2	9094	ENSG00000165325	DEUP1	deuterosome assembly protein 1
NYC_20224	chr11	93341991	93342491	501	*	42.1261	-2.317	0.515555	-4.49419	6.98e-06	0.00172025	Intron (ENST00000618031.4/159989, intron 2 of 13)	11	93332222	93357475	25254	1	159989	ENST00000527307.2	9769	ENSG00000165325	DEUP1	deuterosome assembly protein 1
NYC_20225	chr11	93342762	93343262	501	*	46.3919	-1.68126	0.524788	-3.2037	0.00135676	0.0145337	Intron (ENST00000618031.4/159989, intron 2 of 13)	11	93332222	93357475	25254	1	159989	ENST00000527307.2	10540	ENSG00000165325	DEUP1	deuterosome assembly protein 1
NYC_20226	chr11	93344037	93344537	501	*	36.3416	-1.92573	0.582615	-3.30533	0.000948646	0.0119931	Intron (ENST00000618031.4/159989, intron 2 of 13)	11	93332222	93357475	25254	1	159989	ENST00000527307.2	11815	ENSG00000165325	DEUP1	deuterosome assembly protein 1
NYC_20227	chr11	93345122	93345622	501	*	58.8453	-2.00932	0.409211	-4.91024	9.1e-07	0.000778503	Intron (ENST00000618031.4/159989, intron 2 of 13)	11	93332222	93357475	25254	1	159989	ENST00000527307.2	12900	ENSG00000165325	DEUP1	deuterosome assembly protein 1
NYC_20228	chr11	93348989	93349489	501	*	52.0796	-2.28915	0.497517	-4.60115	4.2e-06	0.00145928	Intron (ENST00000618031.4/159989, intron 2 of 13)	11	93332222	93357475	25254	1	159989	ENST00000527307.2	16767	ENSG00000165325	DEUP1	deuterosome assembly protein 1
NYC_20229	chr11	93350004	93350504	501	*	47.6824	-1.59543	0.548854	-2.90683	0.00365107	0.0266072	Intron (ENST00000618031.4/159989, intron 2 of 13)	11	93332222	93357475	25254	1	159989	ENST00000527307.2	17782	ENSG00000165325	DEUP1	deuterosome assembly protein 1
NYC_20230	chr11	93352272	93352772	501	*	51.9542	-1.52314	0.500599	-3.04264	0.00234513	0.0201062	3' UTR	11	93332222	93357475	25254	1	159989	ENST00000527307.2	20050	ENSG00000165325	DEUP1	deuterosome assembly protein 1
NYC_20231	chr11	93353235	93353735	501	*	57.4095	-1.35835	0.494003	-2.74968	0.00596531	0.0372987	Intron (ENST00000618031.4/159989, intron 2 of 13)	11	93332222	93357475	25254	1	159989	ENST00000527307.2	21013	ENSG00000165325	DEUP1	deuterosome assembly protein 1
NYC_20232	chr11	93355769	93356269	501	*	41.9012	-2.13712	0.692028	-3.0882	0.00201376	0.0183285	Intron (ENST00000618031.4/159989, intron 3 of 13)	11	93332222	93357475	25254	1	159989	ENST00000527307.2	23547	ENSG00000165325	DEUP1	deuterosome assembly protein 1
NYC_20234	chr11	93362482	93362982	501	*	38.8747	-2.16891	0.578738	-3.74765	0.000178501	0.0055145	Intron (ENST00000618031.4/159989, intron 4 of 13)	11	93383468	93438470	55003	1	159989	ENST00000525646.1	-20486	ENSG00000165325	DEUP1	deuterosome assembly protein 1
NYC_20235	chr11	93365187	93365687	501	*	39.1809	-2.3834	0.741435	-3.21458	0.00130637	0.0142117	Intron (ENST00000618031.4/159989, intron 5 of 13)	11	93383468	93438470	55003	1	159989	ENST00000525646.1	-17781	ENSG00000165325	DEUP1	deuterosome assembly protein 1
NYC_20236	chr11	93365897	93366397	501	*	43.7866	-1.87748	0.57785	-3.24908	0.00115778	0.0133127	Intron (ENST00000618031.4/159989, intron 5 of 13)	11	93383468	93438470	55003	1	159989	ENST00000525646.1	-17071	ENSG00000165325	DEUP1	deuterosome assembly protein 1
NYC_20237	chr11	93368011	93368511	501	*	59.7003	-1.45923	0.448348	-3.25468	0.00113521	0.0131559	Intron (ENST00000618031.4/159989, intron 5 of 13)	11	93383468	93438470	55003	1	159989	ENST00000525646.1	-14957	ENSG00000165325	DEUP1	deuterosome assembly protein 1
NYC_20238	chr11	93371285	93371785	501	*	37.0095	-1.89418	0.619359	-3.05829	0.00222604	0.0194404	Intron (ENST00000618031.4/159989, intron 7 of 13)	11	93383468	93438470	55003	1	159989	ENST00000525646.1	-11683	ENSG00000165325	DEUP1	deuterosome assembly protein 1
NYC_20240	chr11	93379457	93379957	501	*	49.5838	-1.95045	0.538472	-3.6222	0.000292108	0.00685272	Intron (ENST00000618031.4/159989, intron 7 of 13)	11	93383468	93438470	55003	1	159989	ENST00000525646.1	-3511	ENSG00000165325	DEUP1	deuterosome assembly protein 1
NYC_20241	chr11	93383133	93383633	501	*	36.357	-2.01688	0.657789	-3.06615	0.00216832	0.019133	Promoter (<=1kb)	11	93383468	93438470	55003	1	159989	ENST00000525646.1	0	ENSG00000165325	DEUP1	deuterosome assembly protein 1
NYC_20242	chr11	93386674	93387174	501	*	43.3732	-1.91665	0.615304	-3.11496	0.00183972	0.0173916	Intron (ENST00000618031.4/159989, intron 8 of 13)	11	93383468	93438470	55003	1	159989	ENST00000525646.1	3206	ENSG00000165325	DEUP1	deuterosome assembly protein 1
NYC_20243	chr11	93389724	93390224	501	*	54.7313	-1.68712	0.397339	-4.24604	2.18e-05	0.00253572	Intron (ENST00000618031.4/159989, intron 9 of 13)	11	93383468	93438470	55003	1	159989	ENST00000525646.1	6256	ENSG00000165325	DEUP1	deuterosome assembly protein 1
NYC_20244	chr11	93391410	93391910	501	*	43.1616	-1.77939	0.543868	-3.27174	0.00106889	0.0126902	Intron (ENST00000618031.4/159989, intron 9 of 13)	11	93383468	93438470	55003	1	159989	ENST00000525646.1	7942	ENSG00000165325	DEUP1	deuterosome assembly protein 1
NYC_20245	chr11	93393364	93393864	501	*	52.7282	-1.60613	0.453241	-3.54366	0.000394612	0.00780924	Intron (ENST00000618031.4/159989, intron 9 of 13)	11	93383468	93438470	55003	1	159989	ENST00000525646.1	9896	ENSG00000165325	DEUP1	deuterosome assembly protein 1
NYC_20246	chr11	93394525	93395025	501	*	45.4385	-1.52952	0.44756	-3.41747	0.00063207	0.00973983	3' UTR	11	93383468	93438470	55003	1	159989	ENST00000525646.1	11057	ENSG00000165325	DEUP1	deuterosome assembly protein 1
NYC_20248	chr11	93397830	93398330	501	*	41.0987	-2.39594	0.747743	-3.20424	0.00135421	0.0145198	Intron (ENST00000618031.4/159989, intron 11 of 13)	11	93411059	93437702	26644	1	159989	ENST00000529909.1	-12729	ENSG00000165325	DEUP1	deuterosome assembly protein 1
NYC_20249	chr11	93407762	93408262	501	*	59.9773	-1.26086	0.35322	-3.56962	0.000357503	0.00750974	Promoter (2-3kb)	11	93411059	93437702	26644	1	159989	ENST00000529909.1	-2797	ENSG00000165325	DEUP1	deuterosome assembly protein 1
NYC_20250	chr11	93408700	93409200	501	*	42.5397	-2.01142	0.720542	-2.79153	0.00524592	0.0341049	Promoter (1-2kb)	11	93411059	93437702	26644	1	159989	ENST00000529909.1	-1859	ENSG00000165325	DEUP1	deuterosome assembly protein 1
NYC_20251	chr11	93410310	93410810	501	*	55.746	-1.84662	0.444032	-4.15875	3.2e-05	0.00287131	Promoter (<=1kb)	11	93411059	93437702	26644	1	159989	ENST00000529909.1	-249	ENSG00000165325	DEUP1	deuterosome assembly protein 1
NYC_20252	chr11	93411912	93412412	501	*	45.8527	-1.64397	0.526111	-3.12475	0.00177956	0.0170332	Promoter (<=1kb)	11	93411059	93437702	26644	1	159989	ENST00000529909.1	853	ENSG00000165325	DEUP1	deuterosome assembly protein 1
NYC_20253	chr11	93428673	93429173	501	*	35.1211	-2.20462	0.78013	-2.82596	0.00471386	0.0315595	Intron (ENST00000618031.4/159989, intron 13 of 13)	11	93411059	93437702	26644	1	159989	ENST00000529909.1	17614	ENSG00000165325	DEUP1	deuterosome assembly protein 1
NYC_20254	chr11	93429240	93429740	501	*	35.3971	-1.86534	0.657901	-2.8353	0.00457832	0.0309522	Intron (ENST00000618031.4/159989, intron 13 of 13)	11	93411059	93437702	26644	1	159989	ENST00000529909.1	18181	ENSG00000165325	DEUP1	deuterosome assembly protein 1
NYC_20255	chr11	93430362	93430862	501	*	40.3497	-1.70669	0.606251	-2.81515	0.00487545	0.0323335	Intron (ENST00000618031.4/159989, intron 13 of 13)	11	93411059	93437702	26644	1	159989	ENST00000529909.1	19303	ENSG00000165325	DEUP1	deuterosome assembly protein 1
NYC_20256	chr11	93431138	93431638	501	*	40.3014	-2.66242	0.600151	-4.43626	9.15e-06	0.00191402	Intron (ENST00000618031.4/159989, intron 13 of 13)	11	93411059	93437702	26644	1	159989	ENST00000529909.1	20079	ENSG00000165325	DEUP1	deuterosome assembly protein 1
NYC_20257	chr11	93432226	93432726	501	*	51.5314	-1.41876	0.505758	-2.80521	0.0050284	0.033087	Intron (ENST00000618031.4/159989, intron 13 of 13)	11	93411059	93437702	26644	1	159989	ENST00000529909.1	21167	ENSG00000165325	DEUP1	deuterosome assembly protein 1
NYC_20258	chr11	93433161	93433661	501	*	46.3712	-2.15021	0.524779	-4.09737	4.18e-05	0.00311138	Intron (ENST00000618031.4/159989, intron 13 of 13)	11	93411059	93437702	26644	1	159989	ENST00000529909.1	22102	ENSG00000165325	DEUP1	deuterosome assembly protein 1
NYC_20259	chr11	93433841	93434341	501	*	58.4036	-2.07241	0.46816	-4.42671	9.57e-06	0.00192074	Intron (ENST00000618031.4/159989, intron 13 of 13)	11	93411059	93437702	26644	1	159989	ENST00000529909.1	22782	ENSG00000165325	DEUP1	deuterosome assembly protein 1
NYC_20260	chr11	93434704	93435204	501	*	52.5792	-1.69351	0.455071	-3.72143	0.0001981	0.00576233	Intron (ENST00000618031.4/159989, intron 13 of 13)	11	93411059	93437702	26644	1	159989	ENST00000529909.1	23645	ENSG00000165325	DEUP1	deuterosome assembly protein 1
NYC_20261	chr11	93435205	93435705	501	*	42.8505	-1.6463	0.611677	-2.69146	0.00711403	0.0424636	Intron (ENST00000618031.4/159989, intron 13 of 13)	11	93411059	93437702	26644	1	159989	ENST00000529909.1	24146	ENSG00000165325	DEUP1	deuterosome assembly protein 1
NYC_20262	chr11	93436226	93436726	501	*	45.5976	-2.13386	0.573504	-3.72074	0.000198644	0.00576716	Intron (ENST00000618031.4/159989, intron 13 of 13)	11	93411059	93437702	26644	1	159989	ENST00000529909.1	25167	ENSG00000165325	DEUP1	deuterosome assembly protein 1
NYC_20263	chr11	93436799	93437299	501	*	35.9265	-1.68516	0.605233	-2.78431	0.00536417	0.0346568	Intron (ENST00000618031.4/159989, intron 13 of 13)	11	93411059	93437702	26644	1	159989	ENST00000529909.1	25740	ENSG00000165325	DEUP1	deuterosome assembly protein 1
NYC_20264	chr11	93438345	93438845	501	*	31.0279	-1.89214	0.580512	-3.25943	0.00111637	0.0130158	3' UTR	11	93411059	93437702	26644	1	159989	ENST00000529909.1	27286	ENSG00000165325	DEUP1	deuterosome assembly protein 1
NYC_20265	chr11	93438912	93439412	501	*	44.9906	-1.7898	0.558324	-3.20567	0.00134749	0.0144788	Distal Intergenic	11	93411059	93437702	26644	1	159989	ENST00000529909.1	27853	ENSG00000165325	DEUP1	deuterosome assembly protein 1
NYC_20266	chr11	93444213	93444713	501	*	59.1749	-1.24839	0.301473	-4.14096	3.46e-05	0.00293458	Distal Intergenic	11	93411059	93437702	26644	1	159989	ENST00000529909.1	33154	ENSG00000165325	DEUP1	deuterosome assembly protein 1
NYC_20267	chr11	93444895	93445395	501	*	55.978	-1.50245	0.378265	-3.97196	7.13e-05	0.00385498	Distal Intergenic	11	93411059	93437702	26644	1	159989	ENST00000529909.1	33836	ENSG00000165325	DEUP1	deuterosome assembly protein 1
NYC_20268	chr11	93446364	93446864	501	*	45.4792	-1.71498	0.445581	-3.84886	0.00011867	0.00465103	Distal Intergenic	11	93411059	93437702	26644	1	159989	ENST00000529909.1	35305	ENSG00000165325	DEUP1	deuterosome assembly protein 1
NYC_20269	chr11	93449741	93450241	501	*	38.2831	-1.81392	0.653309	-2.77652	0.00549446	0.0352461	Distal Intergenic	11	93411059	93437702	26644	1	159989	ENST00000529909.1	38682	ENSG00000165325	DEUP1	deuterosome assembly protein 1
NYC_20270	chr11	93450446	93450946	501	*	46.5024	-2.22568	0.550281	-4.04462	5.24e-05	0.00340158	Distal Intergenic	11	93411059	93437702	26644	1	159989	ENST00000529909.1	39387	ENSG00000165325	DEUP1	deuterosome assembly protein 1
NYC_20271	chr11	93452474	93452974	501	*	51.1976	-2.00255	0.47633	-4.20412	2.62e-05	0.00265662	Distal Intergenic	11	93411059	93437702	26644	1	159989	ENST00000529909.1	41415	ENSG00000165325	DEUP1	deuterosome assembly protein 1
NYC_20272	chr11	93453269	93453769	501	*	37.3556	-1.90849	0.612424	-3.11629	0.00183142	0.0173543	Distal Intergenic	11	93411059	93437702	26644	1	159989	ENST00000529909.1	42210	ENSG00000165325	DEUP1	deuterosome assembly protein 1
NYC_20273	chr11	93453956	93454456	501	*	49.0886	-1.8278	0.577471	-3.16518	0.00154985	0.0156686	Distal Intergenic	11	93411059	93437702	26644	1	159989	ENST00000529909.1	42897	ENSG00000165325	DEUP1	deuterosome assembly protein 1
NYC_20274	chr11	93455143	93455643	501	*	46.1776	-1.61095	0.547184	-2.94407	0.00323931	0.0246037	Distal Intergenic	11	93478472	93499351	20880	2	56935	ENST00000525141.1	43708	ENSG00000166002	SMCO4	single-pass membrane protein with coiled-coil domains 4
NYC_20275	chr11	93458171	93458671	501	*	57.8588	-1.73152	0.398067	-4.34981	1.36e-05	0.00211048	Distal Intergenic	11	93478472	93499351	20880	2	56935	ENST00000525141.1	40680	ENSG00000166002	SMCO4	single-pass membrane protein with coiled-coil domains 4
NYC_20276	chr11	93463579	93464079	501	*	50.0241	-1.7576	0.505137	-3.47944	0.000502455	0.00866352	Distal Intergenic	11	93478472	93499351	20880	2	56935	ENST00000525141.1	35272	ENSG00000166002	SMCO4	single-pass membrane protein with coiled-coil domains 4
NYC_20277	chr11	93464591	93465091	501	*	48.3573	-1.72976	0.493051	-3.50829	0.000451004	0.00830386	Distal Intergenic	11	93478472	93499351	20880	2	56935	ENST00000525141.1	34260	ENSG00000166002	SMCO4	single-pass membrane protein with coiled-coil domains 4
NYC_20279	chr11	93466018	93466518	501	*	44.5421	-1.647	0.502929	-3.27481	0.00105734	0.0126284	Distal Intergenic	11	93478472	93499351	20880	2	56935	ENST00000525141.1	32833	ENSG00000166002	SMCO4	single-pass membrane protein with coiled-coil domains 4
NYC_20280	chr11	93467100	93467600	501	*	77.2374	-1.0502	0.347241	-3.02441	0.00249119	0.020897	Distal Intergenic	11	93478472	93499351	20880	2	56935	ENST00000525141.1	31751	ENSG00000166002	SMCO4	single-pass membrane protein with coiled-coil domains 4
NYC_20281	chr11	93468125	93468625	501	*	41.6056	-1.58146	0.559896	-2.82456	0.00473458	0.0316451	Distal Intergenic	11	93478472	93499351	20880	2	56935	ENST00000525141.1	30726	ENSG00000166002	SMCO4	single-pass membrane protein with coiled-coil domains 4
NYC_20282	chr11	93468684	93469184	501	*	34.1364	-1.90059	0.630903	-3.01249	0.00259112	0.0213984	Distal Intergenic	11	93478472	93499351	20880	2	56935	ENST00000525141.1	30167	ENSG00000166002	SMCO4	single-pass membrane protein with coiled-coil domains 4
NYC_20283	chr11	93469946	93470446	501	*	50.1836	-2.31617	0.533338	-4.34278	1.41e-05	0.0021205	Distal Intergenic	11	93478472	93499351	20880	2	56935	ENST00000525141.1	28905	ENSG00000166002	SMCO4	single-pass membrane protein with coiled-coil domains 4
NYC_20284	chr11	93474794	93475294	501	*	47.8728	-1.56873	0.534823	-2.93318	0.00335511	0.025189	Distal Intergenic	11	93478472	93499351	20880	2	56935	ENST00000525141.1	24057	ENSG00000166002	SMCO4	single-pass membrane protein with coiled-coil domains 4
NYC_20285	chr11	93475761	93476261	501	*	59.2073	-1.47015	0.474547	-3.09801	0.00194828	0.0179436	Distal Intergenic	11	93478472	93499351	20880	2	56935	ENST00000525141.1	23090	ENSG00000166002	SMCO4	single-pass membrane protein with coiled-coil domains 4
NYC_20287	chr11	93477474	93477974	501	*	56.1721	-1.4491	0.364528	-3.97527	7.03e-05	0.00383505	Distal Intergenic	11	93478472	93499351	20880	2	56935	ENST00000525141.1	21377	ENSG00000166002	SMCO4	single-pass membrane protein with coiled-coil domains 4
NYC_20288	chr11	93478519	93479019	501	*	55.2712	-1.63849	0.47941	-3.41773	0.000631446	0.00973761	3' UTR	11	93478472	93499351	20880	2	56935	ENST00000525141.1	20332	ENSG00000166002	SMCO4	single-pass membrane protein with coiled-coil domains 4
NYC_20289	chr11	93479262	93479762	501	*	67.4	-1.68993	0.40135	-4.21062	2.55e-05	0.00260473	5' UTR	11	93478472	93499351	20880	2	56935	ENST00000525141.1	19589	ENSG00000166002	SMCO4	single-pass membrane protein with coiled-coil domains 4
NYC_20290	chr11	93480422	93480922	501	*	62.4417	-1.67559	0.393811	-4.25481	2.09e-05	0.00250523	Intron (ENST00000525141.1/56935, intron 1 of 1)	11	93478472	93499351	20880	2	56935	ENST00000525141.1	18429	ENSG00000166002	SMCO4	single-pass membrane protein with coiled-coil domains 4
NYC_20293	chr11	93482503	93483003	501	*	35.352	-2.16011	0.578075	-3.73673	0.000186431	0.00562584	Intron (ENST00000525141.1/56935, intron 1 of 1)	11	93478472	93499351	20880	2	56935	ENST00000525141.1	16348	ENSG00000166002	SMCO4	single-pass membrane protein with coiled-coil domains 4
NYC_20294	chr11	93483047	93483547	501	*	54.9038	-1.35505	0.465936	-2.90823	0.00363484	0.0265131	Intron (ENST00000525141.1/56935, intron 1 of 1)	11	93478472	93499351	20880	2	56935	ENST00000525141.1	15804	ENSG00000166002	SMCO4	single-pass membrane protein with coiled-coil domains 4
NYC_20295	chr11	93484617	93485117	501	*	37.5118	-1.51832	0.534886	-2.83859	0.00453137	0.0307967	Intron (ENST00000525141.1/56935, intron 1 of 1)	11	93478472	93499351	20880	2	56935	ENST00000525141.1	14234	ENSG00000166002	SMCO4	single-pass membrane protein with coiled-coil domains 4
NYC_20296	chr11	93485185	93485685	501	*	50.9555	-1.5407	0.440719	-3.49589	0.00047249	0.00843557	Intron (ENST00000525141.1/56935, intron 1 of 1)	11	93478472	93499351	20880	2	56935	ENST00000525141.1	13666	ENSG00000166002	SMCO4	single-pass membrane protein with coiled-coil domains 4
NYC_20298	chr11	93487167	93487667	501	*	45.1318	-1.73396	0.497711	-3.48387	0.000494217	0.00861017	Intron (ENST00000525141.1/56935, intron 1 of 1)	11	93478472	93499351	20880	2	56935	ENST00000525141.1	11684	ENSG00000166002	SMCO4	single-pass membrane protein with coiled-coil domains 4
NYC_20299	chr11	93488040	93488540	501	*	65.1177	-1.5903	0.41958	-3.79022	0.000150515	0.0051382	Intron (ENST00000525141.1/56935, intron 1 of 1)	11	93478472	93499351	20880	2	56935	ENST00000525141.1	10811	ENSG00000166002	SMCO4	single-pass membrane protein with coiled-coil domains 4
NYC_20300	chr11	93489522	93490022	501	*	64.0618	-1.35394	0.459911	-2.94391	0.00324094	0.0246076	Intron (ENST00000525141.1/56935, intron 1 of 1)	11	93478472	93499351	20880	2	56935	ENST00000525141.1	9329	ENSG00000166002	SMCO4	single-pass membrane protein with coiled-coil domains 4
NYC_20301	chr11	93491020	93491520	501	*	56.3986	-1.60348	0.391494	-4.09581	4.21e-05	0.00311581	Intron (ENST00000525141.1/56935, intron 1 of 1)	11	93478472	93499351	20880	2	56935	ENST00000525141.1	7831	ENSG00000166002	SMCO4	single-pass membrane protein with coiled-coil domains 4
NYC_20302	chr11	93491621	93492121	501	*	38.6713	-1.88644	0.703461	-2.68166	0.00732574	0.043398	Intron (ENST00000525141.1/56935, intron 1 of 1)	11	93478472	93499351	20880	2	56935	ENST00000525141.1	7230	ENSG00000166002	SMCO4	single-pass membrane protein with coiled-coil domains 4
NYC_20303	chr11	93493011	93493511	501	*	53.5601	-1.60092	0.44518	-3.59612	0.000322994	0.00717555	Intron (ENST00000525141.1/56935, intron 1 of 1)	11	93478472	93499351	20880	2	56935	ENST00000525141.1	5840	ENSG00000166002	SMCO4	single-pass membrane protein with coiled-coil domains 4
NYC_20304	chr11	93493671	93494171	501	*	50.6115	-1.58796	0.46819	-3.39169	0.000694629	0.0101583	Intron (ENST00000525141.1/56935, intron 1 of 1)	11	93478472	93499351	20880	2	56935	ENST00000525141.1	5180	ENSG00000166002	SMCO4	single-pass membrane protein with coiled-coil domains 4
NYC_20305	chr11	93494745	93495245	501	*	56.3984	-1.73931	0.467483	-3.72059	0.000198758	0.00576749	Intron (ENST00000525141.1/56935, intron 1 of 1)	11	93478472	93499351	20880	2	56935	ENST00000525141.1	4106	ENSG00000166002	SMCO4	single-pass membrane protein with coiled-coil domains 4
NYC_20306	chr11	93495755	93496255	501	*	39.3745	-1.67266	0.59708	-2.80139	0.00508829	0.0333632	Intron (ENST00000525141.1/56935, intron 1 of 1)	11	93478472	93499351	20880	2	56935	ENST00000525141.1	3096	ENSG00000166002	SMCO4	single-pass membrane protein with coiled-coil domains 4
NYC_20307	chr11	93496286	93496786	501	*	49.8588	-1.92358	0.429649	-4.47709	7.57e-06	0.00178524	Promoter (2-3kb)	11	93478472	93499351	20880	2	56935	ENST00000525141.1	2565	ENSG00000166002	SMCO4	single-pass membrane protein with coiled-coil domains 4
NYC_20308	chr11	93497362	93497862	501	*	44.3495	-1.92434	0.508588	-3.78369	0.00015452	0.00520499	Promoter (1-2kb)	11	93478472	93499351	20880	2	56935	ENST00000525141.1	1489	ENSG00000166002	SMCO4	single-pass membrane protein with coiled-coil domains 4
NYC_20309	chr11	93498208	93498708	501	*	54.8682	-1.68513	0.475036	-3.54737	0.000389098	0.00778189	Promoter (<=1kb)	11	93478472	93499351	20880	2	56935	ENST00000525141.1	643	ENSG00000166002	SMCO4	single-pass membrane protein with coiled-coil domains 4
NYC_20310	chr11	93499267	93499767	501	*	56.7326	-1.83407	0.511834	-3.58333	0.000339236	0.00732963	Promoter (<=1kb)	11	93478472	93499351	20880	2	56935	ENST00000525141.1	0	ENSG00000166002	SMCO4	single-pass membrane protein with coiled-coil domains 4
NYC_20311	chr11	93501084	93501584	501	*	50.5612	-1.74858	0.379081	-4.61267	3.98e-06	0.00141775	Promoter (1-2kb)	11	93478472	93499351	20880	2	56935	ENST00000525141.1	-1733	ENSG00000166002	SMCO4	single-pass membrane protein with coiled-coil domains 4
NYC_20312	chr11	93501891	93502391	501	*	60.1388	-1.93363	0.395349	-4.89096	1e-06	0.000801593	Promoter (2-3kb)	11	93478472	93499351	20880	2	56935	ENST00000525141.1	-2540	ENSG00000166002	SMCO4	single-pass membrane protein with coiled-coil domains 4
NYC_20313	chr11	93502842	93503342	501	*	45.5992	-1.66608	0.544777	-3.05827	0.0022262	0.0194404	Intron (ENST00000298966.7/56935, intron 1 of 2)	11	93478472	93499351	20880	2	56935	ENST00000525141.1	-3491	ENSG00000166002	SMCO4	single-pass membrane protein with coiled-coil domains 4
NYC_20314	chr11	93503501	93504001	501	*	39.7935	-2.1279	0.561743	-3.78803	0.000151848	0.00516456	Intron (ENST00000298966.7/56935, intron 1 of 2)	11	93478472	93499351	20880	2	56935	ENST00000525141.1	-4150	ENSG00000166002	SMCO4	single-pass membrane protein with coiled-coil domains 4
NYC_20315	chr11	93504816	93505316	501	*	60.1293	-2.16909	0.420038	-5.16405	2.42e-07	0.000386098	Intron (ENST00000298966.7/56935, intron 1 of 2)	11	93478472	93499351	20880	2	56935	ENST00000525141.1	-5465	ENSG00000166002	SMCO4	single-pass membrane protein with coiled-coil domains 4
NYC_20316	chr11	93506140	93506640	501	*	64.6125	-1.92997	0.732837	-2.63357	0.00844936	0.0481761	Intron (ENST00000298966.7/56935, intron 1 of 2)	11	93478472	93499351	20880	2	56935	ENST00000525141.1	-6789	ENSG00000166002	SMCO4	single-pass membrane protein with coiled-coil domains 4
NYC_20317	chr11	93508943	93509443	501	*	52.1741	-2.0029	0.56453	-3.5479	0.000388312	0.00778189	Intron (ENST00000298966.7/56935, intron 1 of 2)	11	93478472	93499351	20880	2	56935	ENST00000525141.1	-9592	ENSG00000166002	SMCO4	single-pass membrane protein with coiled-coil domains 4
NYC_20318	chr11	93509612	93510112	501	*	44.3665	-1.99908	0.558039	-3.58233	0.000340547	0.00733486	Intron (ENST00000298966.7/56935, intron 1 of 2)	11	93478472	93499351	20880	2	56935	ENST00000525141.1	-10261	ENSG00000166002	SMCO4	single-pass membrane protein with coiled-coil domains 4
NYC_20319	chr11	93510475	93510975	501	*	62.8096	-1.62476	0.372376	-4.36322	1.28e-05	0.00207724	Intron (ENST00000298966.7/56935, intron 1 of 2)	11	93478472	93499351	20880	2	56935	ENST00000525141.1	-11124	ENSG00000166002	SMCO4	single-pass membrane protein with coiled-coil domains 4
NYC_20320	chr11	93511376	93511876	501	*	52.6267	-1.84236	0.56264	-3.27449	0.00105852	0.012631	Intron (ENST00000298966.7/56935, intron 1 of 2)	11	93479034	93523367	44334	2	56935	ENST00000529714.5	11491	ENSG00000166002	SMCO4	single-pass membrane protein with coiled-coil domains 4
NYC_20321	chr11	93512396	93512896	501	*	60.6642	-1.38342	0.385325	-3.59027	0.000330332	0.00725086	Intron (ENST00000298966.7/56935, intron 1 of 2)	11	93479034	93523367	44334	2	56935	ENST00000529714.5	10471	ENSG00000166002	SMCO4	single-pass membrane protein with coiled-coil domains 4
NYC_20322	chr11	93512969	93513469	501	*	32.6933	-1.5751	0.551238	-2.85738	0.00427148	0.0295824	Intron (ENST00000298966.7/56935, intron 1 of 2)	11	93479034	93523367	44334	2	56935	ENST00000529714.5	9898	ENSG00000166002	SMCO4	single-pass membrane protein with coiled-coil domains 4
NYC_20323	chr11	93513601	93514101	501	*	41.919	-2.00306	0.589584	-3.39741	0.000680267	0.0100631	Intron (ENST00000298966.7/56935, intron 1 of 2)	11	93479034	93523367	44334	2	56935	ENST00000529714.5	9266	ENSG00000166002	SMCO4	single-pass membrane protein with coiled-coil domains 4
NYC_20324	chr11	93515145	93515645	501	*	43.1227	-1.77735	0.561493	-3.16539	0.00154873	0.0156686	Intron (ENST00000298966.7/56935, intron 1 of 2)	11	93479034	93523367	44334	2	56935	ENST00000529714.5	7722	ENSG00000166002	SMCO4	single-pass membrane protein with coiled-coil domains 4
NYC_20325	chr11	93516039	93516539	501	*	39.0754	-2.12399	0.59096	-3.59414	0.000325469	0.00719906	Intron (ENST00000298966.7/56935, intron 1 of 2)	11	93479034	93523367	44334	2	56935	ENST00000529714.5	6828	ENSG00000166002	SMCO4	single-pass membrane protein with coiled-coil domains 4
NYC_20326	chr11	93516753	93517253	501	*	40.5936	-1.72188	0.471892	-3.64888	0.000263385	0.00656831	Intron (ENST00000298966.7/56935, intron 1 of 2)	11	93479034	93523367	44334	2	56935	ENST00000529714.5	6114	ENSG00000166002	SMCO4	single-pass membrane protein with coiled-coil domains 4
NYC_20328	chr11	93519566	93520066	501	*	56.5424	-1.84347	0.464974	-3.96467	7.35e-05	0.00388452	Intron (ENST00000298966.7/56935, intron 1 of 2)	11	93479034	93523367	44334	2	56935	ENST00000529714.5	3301	ENSG00000166002	SMCO4	single-pass membrane protein with coiled-coil domains 4
NYC_20329	chr11	93520600	93521100	501	*	37.6091	-1.63468	0.538615	-3.03498	0.00240554	0.02046	Promoter (2-3kb)	11	93479034	93523367	44334	2	56935	ENST00000529714.5	2267	ENSG00000166002	SMCO4	single-pass membrane protein with coiled-coil domains 4
NYC_20330	chr11	93521539	93522039	501	*	38.6908	-1.63663	0.457034	-3.58099	0.000342298	0.00734387	Promoter (1-2kb)	11	93479034	93523367	44334	2	56935	ENST00000529714.5	1328	ENSG00000166002	SMCO4	single-pass membrane protein with coiled-coil domains 4
NYC_20332	chr11	93523143	93523643	501	*	48.716	-1.65161	0.509542	-3.24136	0.0011896	0.0135173	Promoter (<=1kb)	11	93479034	93523367	44334	2	56935	ENST00000529714.5	0	ENSG00000166002	SMCO4	single-pass membrane protein with coiled-coil domains 4
NYC_20333	chr11	93524069	93524569	501	*	46.1509	-1.37231	0.403691	-3.3994	0.000675335	0.0100353	Promoter (<=1kb)	11	93479034	93523367	44334	2	56935	ENST00000529714.5	-702	ENSG00000166002	SMCO4	single-pass membrane protein with coiled-coil domains 4
NYC_20334	chr11	93525904	93526404	501	*	51.6068	-1.75389	0.434745	-4.0343	5.48e-05	0.00344474	Promoter (2-3kb)	11	93479034	93523367	44334	2	56935	ENST00000529714.5	-2537	ENSG00000166002	SMCO4	single-pass membrane protein with coiled-coil domains 4
NYC_20335	chr11	93526717	93527217	501	*	42.6584	-1.67675	0.52946	-3.16691	0.00154068	0.0156512	Intron (ENST00000298966.7/56935, intron 1 of 2)	11	93479034	93523367	44334	2	56935	ENST00000529714.5	-3350	ENSG00000166002	SMCO4	single-pass membrane protein with coiled-coil domains 4
NYC_20336	chr11	93527389	93527889	501	*	44.2685	-1.79529	0.602538	-2.97955	0.00288672	0.0228797	Intron (ENST00000298966.7/56935, intron 1 of 2)	11	93479034	93523367	44334	2	56935	ENST00000529714.5	-4022	ENSG00000166002	SMCO4	single-pass membrane protein with coiled-coil domains 4
NYC_20337	chr11	93528685	93529185	501	*	43.4096	-1.88389	0.554086	-3.39999	0.000673893	0.0100225	Intron (ENST00000298966.7/56935, intron 1 of 2)	11	93479034	93523367	44334	2	56935	ENST00000529714.5	-5318	ENSG00000166002	SMCO4	single-pass membrane protein with coiled-coil domains 4
NYC_20339	chr11	93531326	93531826	501	*	36.327	-1.69475	0.520528	-3.25584	0.00113059	0.0131242	Intron (ENST00000298966.7/56935, intron 1 of 2)	11	93478941	93537915	58975	2	56935	ENST00000527149.5	6089	ENSG00000166002	SMCO4	single-pass membrane protein with coiled-coil domains 4
NYC_20340	chr11	93531889	93532389	501	*	53.4131	-1.85365	0.499841	-3.70848	0.000208505	0.00590629	Intron (ENST00000298966.7/56935, intron 1 of 2)	11	93478941	93537915	58975	2	56935	ENST00000527149.5	5526	ENSG00000166002	SMCO4	single-pass membrane protein with coiled-coil domains 4
NYC_20341	chr11	93533012	93533512	501	*	58.1431	-1.45768	0.382649	-3.80944	0.000139282	0.00495935	Intron (ENST00000298966.7/56935, intron 1 of 2)	11	93478941	93537915	58975	2	56935	ENST00000527149.5	4403	ENSG00000166002	SMCO4	single-pass membrane protein with coiled-coil domains 4
NYC_20342	chr11	93533746	93534246	501	*	40.6201	-2.51453	0.64322	-3.90929	9.26e-05	0.00421509	Intron (ENST00000298966.7/56935, intron 1 of 2)	11	93478941	93537915	58975	2	56935	ENST00000527149.5	3669	ENSG00000166002	SMCO4	single-pass membrane protein with coiled-coil domains 4
NYC_20343	chr11	93534425	93534925	501	*	46.4613	-1.86901	0.47306	-3.9509	7.79e-05	0.00396278	Promoter (2-3kb)	11	93478941	93537915	58975	2	56935	ENST00000527149.5	2990	ENSG00000166002	SMCO4	single-pass membrane protein with coiled-coil domains 4
NYC_20344	chr11	93535066	93535566	501	*	48.7412	-1.75889	0.447819	-3.92768	8.58e-05	0.00410388	Promoter (2-3kb)	11	93478941	93537915	58975	2	56935	ENST00000527149.5	2349	ENSG00000166002	SMCO4	single-pass membrane protein with coiled-coil domains 4
NYC_20345	chr11	93536418	93536918	501	*	50.6083	-1.46525	0.50686	-2.89084	0.00384217	0.027551	Promoter (<=1kb)	11	93478941	93537915	58975	2	56935	ENST00000527149.5	997	ENSG00000166002	SMCO4	single-pass membrane protein with coiled-coil domains 4
NYC_20347	chr11	93538490	93538990	501	*	61.5154	-1.5016	0.434561	-3.45544	0.00054939	0.00906468	Promoter (<=1kb)	11	93478941	93537915	58975	2	56935	ENST00000527149.5	-575	ENSG00000166002	SMCO4	single-pass membrane protein with coiled-coil domains 4
NYC_20348	chr11	93539613	93540113	501	*	34.4355	-2.42746	0.592636	-4.09603	4.2e-05	0.00311581	Promoter (1-2kb)	11	93478941	93537915	58975	2	56935	ENST00000527149.5	-1698	ENSG00000166002	SMCO4	single-pass membrane protein with coiled-coil domains 4
NYC_20349	chr11	93540236	93540736	501	*	49.6428	-1.96834	0.563042	-3.49591	0.00047245	0.00843557	Promoter (2-3kb)	11	93478941	93537915	58975	2	56935	ENST00000527149.5	-2321	ENSG00000166002	SMCO4	single-pass membrane protein with coiled-coil domains 4
NYC_20353	chr11	93544490	93544990	501	*	31.4285	-1.63038	0.591848	-2.75473	0.00587398	0.0369084	Promoter (1-2kb)	11	93478472	93543391	64920	2	56935	ENST00000298966.7	-1099	ENSG00000166002	SMCO4	single-pass membrane protein with coiled-coil domains 4
NYC_20354	chr11	93545044	93545544	501	*	44.7593	-1.81983	0.557098	-3.26663	0.00108838	0.0128151	Promoter (1-2kb)	11	93478472	93543391	64920	2	56935	ENST00000298966.7	-1653	ENSG00000166002	SMCO4	single-pass membrane protein with coiled-coil domains 4
NYC_20355	chr11	93546035	93546535	501	*	43.5763	-1.67556	0.47358	-3.53807	0.000403063	0.00785842	Promoter (2-3kb)	11	93478472	93543391	64920	2	56935	ENST00000298966.7	-2644	ENSG00000166002	SMCO4	single-pass membrane protein with coiled-coil domains 4
NYC_20356	chr11	93546601	93547101	501	*	39.676	-1.4797	0.55672	-2.65789	0.00786322	0.0457579	Distal Intergenic	11	93478472	93543391	64920	2	56935	ENST00000298966.7	-3210	ENSG00000166002	SMCO4	single-pass membrane protein with coiled-coil domains 4
NYC_20357	chr11	93547643	93548143	501	*	44.649	-1.46096	0.485375	-3.00996	0.00261285	0.0214836	Distal Intergenic	11	93478472	93543391	64920	2	56935	ENST00000298966.7	-4252	ENSG00000166002	SMCO4	single-pass membrane protein with coiled-coil domains 4
NYC_20358	chr11	93548388	93548888	501	*	33.4281	-1.83706	0.56068	-3.27649	0.00105108	0.0126122	Distal Intergenic	11	93478472	93543391	64920	2	56935	ENST00000298966.7	-4997	ENSG00000166002	SMCO4	single-pass membrane protein with coiled-coil domains 4
NYC_20359	chr11	93548903	93549403	501	*	48.9497	-1.85801	0.568214	-3.26991	0.0010758	0.0127367	Distal Intergenic	11	93478472	93543391	64920	2	56935	ENST00000298966.7	-5512	ENSG00000166002	SMCO4	single-pass membrane protein with coiled-coil domains 4
NYC_20361	chr11	93551426	93551926	501	*	52.0812	-1.7686	0.478463	-3.69642	0.000218659	0.00603492	Distal Intergenic	11	93478472	93543391	64920	2	56935	ENST00000298966.7	-8035	ENSG00000166002	SMCO4	single-pass membrane protein with coiled-coil domains 4
NYC_20362	chr11	93552721	93553221	501	*	53.1431	-2.3387	0.562253	-4.15952	3.19e-05	0.00287131	Distal Intergenic	11	93478472	93543391	64920	2	56935	ENST00000298966.7	-9330	ENSG00000166002	SMCO4	single-pass membrane protein with coiled-coil domains 4
NYC_20363	chr11	93554255	93554755	501	*	42.5327	-1.6457	0.538867	-3.05399	0.00225816	0.0196046	Distal Intergenic	11	93478472	93543391	64920	2	56935	ENST00000298966.7	-10864	ENSG00000166002	SMCO4	single-pass membrane protein with coiled-coil domains 4
[truncated: 6,519 more rows]

## Sheet: Table 9b - Endo LC vs NYC
	seqnames	start	end	width	strand	baseMean	log2FoldChange	lfcSE	stat	pvalue	padj	annotation	geneChr	geneStart	geneEnd	geneLength	geneStrand	geneId	transcriptId	distanceToTSS	ENSEMBL	SYMBOL	GENENAME
[truncated: 21 more rows]

## Sheet: Table 9c - VK LC vs NYC
	seqnames	start	end	width	strand	baseMean	log2FoldChange	lfcSE	stat	pvalue	padj	annotation	geneChr	geneStart	geneEnd	geneLength	geneStrand	geneId	transcriptId	distanceToTSS	ENSEMBL	SYMBOL	GENENAME
[truncated: 109 more rows]
