# Supplementary material for: Cervicovaginal microbiome alters transcriptomic and epigenomic signatures across cervicovaginal epithelial barriers
Source: Research Square preprint supplement (doi:10.21203/rs.3.rs-6171614/v1), 2025-05-07
Supplement: Supplementary file 9 [file ffc35a4bcf822ad5f58a5c9f.xlsx]

## Sheet: TOC
Gene Ontology Analysis Results
Table of Contents
Supplemental Table 6a	Ecto GV vs NYC sups
Supplemental Table 6b	Ecto LC vs NYC sups
Supplemental Table 6c	Endo GV vs NYC sups
Supplemental Table 6d	Endo LC vs NYC sups
Supplemental Table 6e	Vaginal GV vs NYC sups
Supplemental Table 6f	Vaginal LC vs NYC sups

## Sheet: Table 3a
ID	Term_Description	Fold_Enrichment	occurrence	support	lowest_p	highest_p	Up_regulated	Down_regulated
GO:1990391	DNA repair complex	48.3376	2	0.0119765	0.00203925	0.00203925	ATM
GO:0016581	NuRD complex	36.2532	1	0.0120482	0.00370728	0.00370728	CHD5
GO:0030574	collagen catabolic process	29.0026	10	0.0129038	0.00586917	0.00586917	MMP9
GO:0043153	entrainment of circadian clock by photoperiod	29.0026	8	0.0128205	0.00586917	0.00586917	PDE6B
GO:0090399	replicative senescence	58.0051	8	0.012987	0.00694747	0.00694747	ATM
GO:0071480	cellular response to gamma radiation	34.1207	8	0.012987	0.00786638	0.00786638	ATM
GO:0006977	DNA damage response, signal transduction by p53 class mediator resulting in cell cycle arrest	32.2251	8	0.012987	0.00786638	0.00786638	ATM
GO:0045785	positive regulation of cell adhesion	43.5038	10	0.0131602	0.0120401	0.0240803	ATM, EPHA4, SAA1
GO:0022617	extracellular matrix disassembly	14.1476	10	0.0129038	0.0126572	0.0126572	MMP9
GO:0004222	metalloendopeptidase activity	9.83138	10	0.0129038	0.0175976	0.0175976	MMP9
GO:0004252	serine-type endopeptidase activity	7.25064	10	0.0129038	0.0243602	0.0243602	MMP9
GO:0034614	cellular response to reactive oxygen species	27.6215	10	0.012987	0.0265794	0.0265794	ATM, MMP9
GO:0090398	cellular senescence	14.8731	8	0.012987	0.0285028	0.0285028	ATM
GO:1904724	tertiary granule lumen	21.4834	10	0.0129038	0.0366891	0.0366891	CXCL1, MMP9
GO:0006935	chemotaxis	8.05627	10	0.0129038	0.0366891	0.0366891	CXCL1
GO:0071222	cellular response to lipopolysaccharide	6.82413	10	0.0129038	0.0366891	0.0366891	MMP9
GO:0050731	positive regulation of peptidyl-tyrosine phosphorylation	10.7417	10	0.0129038	0.0441598	0.0441598	CSF3
GO:0007204	positive regulation of cytosolic calcium ion concentration	10.3581	8	0.0128205	0.0475207	0.0475207	SAA1

## Sheet: Table 3b
ID	Term_Description	Fold_Enrichment	occurrence	support	lowest_p	highest_p	Up_regulated	Down_regulated
GO:0031674	I band	11.8539	1	0.00724638	2.99307e-10	2.99307e-10	MYL3, TCAP, ANKRD2, ANKRD1, MYPN
GO:0003700	DNA-binding transcription factor activity	1.99178	10	0.0230647	8.57144e-10	6.60649e-06	BCL6, CEBPA, DDIT3, NR5A2, GATA2, GSC2, HOXC5, NFATC2, SIM2, PAX8, NR1H4, LEF1, MAFA	EGR1, ETV1, FOXL1, GLI2, MEF2C, CREB5
GO:0000932	P-body	3.24423	8	0.00944152	9.32684e-09	0.0109366	SQSTM1, LIN28A, MEX3B	APOBEC3G, APOBEC3D, APOBEC3H
GO:0004713	protein tyrosine kinase activity	2.44604	10	0.045045	3.1286e-06	5.63712e-06	CSF1R, KIT, LCK, MATK, ROS1
GO:0006814	sodium ion transport	9.24605	10	0.00858511	5.62084e-06	0.00175877	SGK1, SLC4A11	SCN5A, SCNN1B, SCNN1D, SCNN1G
GO:0030424	axon	1.91133	8	0.0171391	7.51563e-06	0.000249739	ATP1A3, CALB1, CCK, GPER1, NEFM, NEFH, NEFL, SYT11
GO:0001228	DNA-binding transcription activator activity, RNA polymerase II-specific	1.44123	10	0.00944152	8.53328e-06	0.014178	CEBPA, DDIT3, NR4A2, NR4A3, ALX1, NR1H4, KLF15, LEF1, SCX	EGR1, ETV1, MEF2C, GRHL1
GO:0030674	protein-macromolecule adaptor activity	2.05468	9	0.00869565	3.73291e-05	0.0432901	NEFH, NEFL, TCAP, SQSTM1, IRGM	ANK3
GO:0055008	cardiac muscle tissue morphogenesis	6.16403	1	0.00724638	4.57709e-05	4.57709e-05	TCAP, ANKRD1
GO:0031397	negative regulation of protein ubiquitination	4.20275	10	0.169223	4.92012e-05	9.84023e-05	ARRB1, HSPA1A, SQSTM1, BEX1, BEX2	PER2
GO:0031625	ubiquitin protein ligase binding	1.23776	10	0.100008	4.92012e-05	0.00161853	ARRB1, HSPA1A, LAPTM5, SQSTM1, USP2, SYT11	NGFR, SCN5A, TXNIP, DET1
GO:0031432	titin binding	7.70504	1	0.00724638	5.5894e-05	5.5894e-05	TCAP, ANKRD1, TRIM63
GO:0051897	positive regulation of phosphatidylinositol 3-kinase/protein kinase B signal transduction	1.91133	10	0.0171702	6.10637e-05	0.00476099	CSF1R, FLT1, GPER1, KIT, TEK, GDF15, LIN28A	FAM110C
GO:0061629	RNA polymerase II-specific DNA-binding transcription factor binding	1.78956	9	0.0144928	7.04604e-05	0.0169149	CEBPA, DDIT3, GATA2, EOMES, ANKRD2, ANKRD1, BEX1	MEF2C, ZFPM2
GO:0044754	autolysosome	9.24605	10	0.0735825	9.15419e-05	0.00053403	FTH1, FTL, SQSTM1
GO:0032993	protein-DNA complex	3.42446	10	0.00858511	0.000144787	0.00850575	DDIT3, ST18, NUPR1, LEF1
GO:0045214	sarcomere organization	3.24423	1	0.00724638	0.000184084	0.000184084	TCAP, MYPN
GO:0000976	transcription cis-regulatory region binding	1.36641	10	0.00944152	0.000195152	0.00512947	CEBPA, DDIT3, NR5A2, PAX8, KLF15	EGR1, MEF2C, PER2, GRHL1
GO:0045444	fat cell differentiation	4.20275	6	0.0126346	0.000198679	0.0391516	CEBPA, GATA2, NR4A2, NR4A3, MAFB	ZFPM2
GO:0045820	negative regulation of glycolytic process	8.4055	8	0.00860287	0.000217533	0.0426308	NUPR1, TRIM63, FLCN
GO:0005200	structural constituent of cytoskeleton	4.40288	10	0.0524508	0.000249739	0.000380314	ANK1, KRT9, NEFH, NEFL, INA, SYNM	ANK3, SPTBN4
GO:0016234	inclusion body	8.80576	10	0.126551	0.000249739	0.000328573	HSPA1A, MT3, SQSTM1, HAP1
GO:0004714	transmembrane receptor protein tyrosine kinase activity	4.86634	10	0.00885233	0.000368169	0.0262224	FLT1, KIT, TEK
GO:0034620	cellular response to unfolded protein	4.10936	5	0.0144928	0.000420399	0.045944	HSPA1A, HSPB8
GO:0003723	RNA binding	0.619501	6	0.00830233	0.000515403	0.0188526	LIN28A, MEX3B, LIN28B	APOBEC3G
GO:0005882	intermediate filament	3.08202	10	0.00858511	0.000586255	0.000791067	KRT75, SYNM
GO:0042169	SH2 domain binding	4.10936	10	0.0377661	0.000614114	0.00307057	LCK, SQSTM1, BLNK	SKAP1
GO:0038023	signaling receptor activity	2.37078	10	0.0163268	0.000614114	0.0228522	TEK, TLR4, CUBN, SQSTM1	IL10RB, NGFR, NOTCH3, KLRK1
GO:0007169	cell surface receptor protein tyrosine kinase signaling pathway	4.10936	10	0.00858511	0.000614114	0.0444506	CSF1R, FLT1, TEK	MTSS1
GO:0000977	RNA polymerase II transcription regulatory region sequence-specific DNA binding	2.07001	8	0.00858511	0.000864531	0.0143709	AEBP1, ALX1, NR1H4, KLF15, LEF1, STOX1	EGR1, MEF2C, SATB1
GO:0045746	negative regulation of Notch signaling pathway	2.46561	3	0.00900901	0.000871621	0.0408198	ARRB1, GATA2
GO:0035556	intracellular signal transduction	1.45771	10	0.0349672	0.00132303	0.00476099	HMOX1, LCK, TFRC, NR4A3, SQSTM1, BLNK, FLCN
GO:0018108	peptidyl-tyrosine phosphorylation	2.56835	10	0.0257553	0.00172754	0.00476099	CSF1R, FLT1, LCK, RELN
GO:0019221	cytokine-mediated signaling pathway	2.51593	10	0.00858511	0.00172754	0.00476099	CSF1R, IL6, IL6R, KIT
GO:2001244	positive regulation of intrinsic apoptotic signaling pathway	4.02002	10	0.0166713	0.00177948	0.00355895	DDIT3, LCK, NUPR1
GO:0003713	transcription coactivator activity	1.49936	10	0.00858511	0.00186554	0.0335702	ARRB1, CITED2, NUPR1, ANKRD1	SUPT3H, PER2, RIPK3, ZFPM2, TOX2
GO:0030890	positive regulation of B cell proliferation	5.92695	8	0.00885233	0.00195388	0.00312622	NFATC2, TFRC	NCKAP1L, MEF2C, TNFSF13B
GO:0045171	intercellular bridge	1.83453	10	0.0250069	0.00215878	0.0325929	APC2, TUBB4A, NUPR1, TUBB2B	CENPE
GO:0006879	intracellular iron ion homeostasis	3.35002	9	0.00847458	0.00229605	0.0241261	BMP6, FTH1, FTL, HMOX1, BOLA2
GO:1902895	positive regulation of miRNA transcription	2.93525	10	0.00858511	0.00230587	0.0444784	GATA2	EGR1, NGFR, NOTCH3
GO:0014704	intercalated disc	4.40288	4	0.00803537	0.00247977	0.00300866	CDH2, GJA5	ANK3, SCN5A
GO:0001221	transcription coregulator binding	3.08202	2	0.00860287	0.00270201	0.00358742	NR5A2, GATA2, NR1H4
GO:0004672	protein kinase activity	1.00719	2	0.00768823	0.00301981	0.00392822	TEK, HSPB8	PDK1, MAPKAPK2, RIPK3
GO:0140693	molecular condensate scaffold activity	1.58052	9	0.00847458	0.00344252	0.00697461	SQSTM1, BLNK
GO:0035725	sodium ion transmembrane transport	3.33191	6	0.00900901	0.00395768	0.00395768	SLC4A8	SCN5A, SCNN1B, SCNN1G
GO:0002020	protease binding	2.12553	4	0.00830233	0.00450402	0.049166	CD70, SERPINB13, SERPINB3, SERPINB4, CD177	SERPINE1
GO:0030018	Z disc	2.0895	1	0.00724638	0.00485619	0.00485619	TCAP, MYPN	ANK3, SCN5A
GO:0032436	positive regulation of proteasomal ubiquitin-dependent protein catabolic process	2.46561	10	0.0282542	0.00489872	0.0122531	CEBPA, HSPA1A	DET1, PRICKLE1
GO:0045111	intermediate filament cytoskeleton	1.96724	10	0.00858511	0.00492764	0.00663725	NEFM, SYNM	DDX60
GO:0043025	neuronal cell body	2.37078	6	0.00935887	0.00520879	0.0247597	ATP1A3, CACNA1A, CALB1, KIF5C, SLC1A3, SLC6A6, ZNF804A	SPTBN4, SRR
GO:0000981	DNA-binding transcription factor activity, RNA polymerase II-specific	1.13102	2	0.00860287	0.0055767	0.0486927	GATA2, NR1H4, LEF1	MEF2C
GO:0009925	basal plasma membrane	2.93525	5	0.00917431	0.00692339	0.00829656	SLC1A3, SLC6A9, TEK	ANK3
GO:0033138	positive regulation of peptidyl-serine phosphorylation	3.27874	7	0.00869565	0.00692339	0.0140256	IL6, TFRC, STOX1, IRGM	NOS1
GO:0031267	small GTPase binding	0.96313	7	0.00869565	0.00692339	0.0140256	IQGAP2, NPC1L1, RAPGEF6	FMNL1, NGFR
GO:0003714	transcription corepressor activity	1.38001	3	0.00847458	0.00793405	0.0185657	CRYM, DDIT3, HSPA1A, CITED2, ANKRD1	ZFPM2
GO:0019369	arachidonic acid metabolic process	8.80576	7	0.00869565	0.0080331	0.0175621	ALOX12B, DAGLA, FAAH, ABHD6	ALOX15B, CYP1B1
GO:0010506	regulation of autophagy	1.92626	10	0.00858511	0.00849011	0.0145545	DDIT3, NUPR1, LAMP3
GO:0055013	cardiac muscle cell development	3.08202	1	0.00724638	0.00924148	0.00924148	TCAP
GO:0016567	protein ubiquitination	0.890756	10	0.00858511	0.00958733	0.0122531	ARRB1, KLHL24, RNF157, FBXO32	DET1
GO:0043274	phospholipase binding	4.74156	10	0.0385098	0.00959924	0.0187905	LCK, BLNK
GO:0030425	dendrite	1.97565	8	0.00900901	0.0109463	0.0177901	CALB1, GPER1, RELN, SLC6A6, SLC4A8, SYT11, TENM2, DNER	ANK3, FARP1
GO:0032922	circadian regulation of gene expression	2.65691	6	0.00830233	0.0115281	0.016737	USP2	EGR1, NGFR, PER2, CIART
GO:0019955	cytokine binding	4.10936	10	0.0253386	0.0117376	0.0205618	CSF1R, KIT
GO:0042531	positive regulation of tyrosine phosphorylation of STAT protein	4.83454	10	0.00858511	0.0122033	0.0210642	CNTF, CSF1R, CSF2, IL6, IL6R, KIT, IL20	PIBF1
GO:0031410	cytoplasmic vesicle	1.56334	10	0.0153765	0.0126148	0.048718	ARRB1, SERPINB3, SLC1A3, TFRC, VGF, LAPTM5	CXXC4
GO:0001222	transcription corepressor binding	1.54101	1	0.00917431	0.0128267	0.0128267	BCL6, LEF1
GO:0045869	negative regulation of single stranded viral RNA replication via double stranded DNA intermediate	10.2734	8	0.00909166	0.0147925	0.0221887		APOBEC3G, APOBEC3D, APOBEC3H
GO:0140313	molecular sequestering activity	4.10936	7	0.00900901	0.0153147	0.0204196	TCN1, SQSTM1
GO:0016605	PML body	1.68878	7	0.00819672	0.0153915	0.0230872	SQSTM1, TENM2	SATB1, SPTBN4
GO:0015629	actin cytoskeleton	1.56713	4	0.00841287	0.0161485	0.0209884	FLT1, SPTB, WIPF1, HAP1, IQGAP2, AIF1L	SCNN1D, MTSS1, NEURL1B
GO:0006954	inflammatory response	3.10792	10	0.0171702	0.0166075	0.0285365	ADM, ADORA1, CSF1R, IL6, KIT, AOC3, CCRL2, BLNK, NRROS	IL10RB, MAPKAPK2, TXNIP
GO:0030217	T cell differentiation	4.62302	10	0.0171702	0.0166538	0.0283367	KIT, LCK	LEPR
GO:0001934	positive regulation of protein phosphorylation	2.21905	9	0.018018	0.0166538	0.0308028	ARRB1, CSF1R, GPER1, MT3, TEK, TFRC, GPNMB, IRGM	LEPR
GO:0030308	negative regulation of cell growth	1.71223	7	0.00819672	0.017316	0.0279862	BCL6, FRZB, HSPA1A, MT3, RERG
GO:0035455	response to interferon-alpha	6.16403	10	0.00900901	0.017666	0.0219278	LAMP3	IFITM1
GO:0007611	learning or memory	2.64173	10	0.00858511	0.0177012	0.0254998	GALR2	MEF2C, PTPRZ1
GO:0001666	response to hypoxia	1.95684	10	0.00858511	0.0177449	0.0288355	MT3, CITED2	EGR1, NOS1
GO:0031396	regulation of protein ubiquitination	2.80183	9	0.0169492	0.0180638	0.0318705	HSPA1A
GO:0045295	gamma-catenin binding	6.16403	3	0.00869565	0.0180638	0.0475199	CDH2, LEF1
GO:0008013	beta-catenin binding	1.92626	1	0.00917431	0.0180638	0.0180638	CDH2, NR4A2, APC2, LEF1
GO:1990907	beta-catenin-TCF complex	3.08202	1	0.00917431	0.0180638	0.0180638	LEF1
GO:0005667	transcription regulator complex	1.52198	1	0.00917431	0.0180638	0.0180638	CEBPA, LEF1, BEX1, SCX
GO:0140694	non-membrane-bounded organelle assembly	2.80183	9	0.00847458	0.0186575	0.0294993	SQSTM1
GO:0071383	cellular response to steroid hormone stimulus	2.20144	9	0.00847458	0.0186575	0.0294993	HSPA1A
GO:0034116	positive regulation of heterotypic cell-cell adhesion	4.40288	10	0.0168924	0.0187905	0.0233153	LCK	SKAP1
GO:0001891	phagocytic cup	8.21871	10	0.00858511	0.0187905	0.0233153	TLR4, MYO1G	CORO1A, SH3BP1
GO:0050900	leukocyte migration	1.92626	10	0.0168924	0.0187905	0.0233153	LCK
GO:0043149	stress fiber assembly	1.92626	10	0.00858511	0.0187905	0.0233153	ARRB1
GO:0090575	RNA polymerase II transcription regulator complex	1.48174	4	0.00841287	0.0190569	0.0230633	CEBPA, DDIT3, NR5A2, MAF, MAFB
GO:0006468	protein phosphorylation	0.662799	1	0.00787402	0.0193025	0.0193025	LCK, MATK, ROS1, SGK1, MEX3B	MAPKAPK2
GO:0042026	protein refolding	2.20144	9	0.00900901	0.0203756	0.0391115	HSPA1A
GO:0006809	nitric oxide biosynthetic process	7.70504	3	0.00847458	0.0203756	0.0230163	NOS2	CYP1B1, NOS1
GO:0050661	NADP binding	6.60432	3	0.00847458	0.0203756	0.0253652	CRYM, NOS2	NOS1
GO:0140036	ubiquitin-modified protein reader activity	5.60367	10	0.0215198	0.0204723	0.025708	LAPTM5, SQSTM1
GO:0046777	protein autophosphorylation	1.11667	10	0.0171702	0.0206232	0.0377137	CSF1R, FLT1, KIT, MEX3B	RIPK3
GO:0003682	chromatin binding	1.0105	3	0.00819672	0.0206947	0.0338237	BCL6, NR5A2, GATA2, GPER1, CITED2	MPO
GO:0043548	phosphatidylinositol 3-kinase binding	6.16403	10	0.00909166	0.0212153	0.0499401	LCK	CORO1A
GO:0071468	cellular response to acidic pH	7.70504	10	0.00858511	0.0214178	0.0294993		SCNN1B, SCNN1D, SCNN1G
GO:0010765	positive regulation of sodium ion transport	5.60367	6	0.00900901	0.0214178	0.0214178		ANK3, SCN5A
GO:0031054	pre-miRNA processing	5.60367	5	0.00847458	0.0215816	0.0433992	LIN28A, LIN28B
GO:0006883	intracellular sodium ion homeostasis	8.80576	10	0.00858511	0.0221245	0.0294993	ATP1A3	SCNN1B, SCNN1D, SCNN1G
GO:0098719	sodium ion import across plasma membrane	6.60432	10	0.00858511	0.0221245	0.0294993		SCNN1B, SCNN1D, SCNN1G
GO:0061564	axon development	2.80183	8	0.00885233	0.0222112	0.0285119	NEFH
GO:0071466	cellular response to xenobiotic stimulus	2.28298	2	0.00860287	0.0222392	0.0222392	TFRC	MEF2C
GO:0043232	intracellular non-membrane-bounded organelle	2.20144	3	0.00787402	0.022389	0.0253652	SQSTM1
GO:0002028	regulation of sodium ion transport	6.16403	2	0.00768823	0.0230163	0.0237715		NOS1, SPTBN4
GO:0060314	regulation of ryanodine-sensitive calcium-release channel activity	2.56835	2	0.00768823	0.0230163	0.0237715		NOS1
GO:0008544	epidermis development	2.65691	9	0.00847458	0.0230562	0.0230562	STS, KRT9, CALML5	CASP14, GRHL1
GO:0051131	chaperone-mediated protein complex assembly	1.81295	9	0.00970874	0.0236509	0.0416816	HSPA1A
GO:0009408	response to heat	1.81295	9	0.00847458	0.0236509	0.0416816		NOS1
GO:0044325	transmembrane transporter binding	1.69342	7	0.00900901	0.0237715	0.0418941	TCAP, HAP1	ANK3, NOS1, SCN5A
GO:0097718	disordered domain specific binding	1.62211	9	0.00847458	0.0240463	0.0458061	HSPA1A
GO:0005246	calcium channel regulator activity	2.80183	9	0.00847458	0.0240463	0.048807	SGK1	NOS1
GO:0002931	response to ischemia	5.60367	10	0.00858511	0.0240463	0.048807	CSF1R	EGR1, MEF2C, PER2
GO:0050660	flavin adenine dinucleotide binding	3.24423	3	0.00847458	0.0240463	0.0339708	NOS2	NOS1
GO:0045454	cell redox homeostasis	5.87051	3	0.00847458	0.0240463	0.0364714	DDIT3, NOS2, BOLA2	NOS1
GO:0010526	retrotransposon silencing	5.77878	8	0.00909166	0.024583	0.049166		APOBEC3G, APOBEC3H, APOBEC3A
GO:0030097	hemopoiesis	3.55617	10	0.0213694	0.0248643	0.0377137	CSF1R, KIT, FLCN
GO:0006622	protein targeting to lysosome	3.85252	10	0.00858511	0.0259059	0.0333076	LAPTM5, NAGPA
GO:0043005	neuron projection	2.09457	10	0.0163268	0.0267283	0.0499055	SLC1A3, STX3, SLC30A3, SLC4A8, SYT11, TENM2	ANK3
GO:0070742	C2H2 zinc finger domain binding	5.13669	1	0.00819672	0.0269908	0.0269908	GATA2, LEF1
GO:0140052	cellular response to oxidised low-density lipoprotein particle stimulus	5.13669	1	0.00813008	0.027086	0.027086	TLR4	TXNIP
GO:0005884	actin filament	3.7739	10	0.0118335	0.0279632	0.0499401	TEK, APC2, AIF1L, GAS2L2	CORO1A, SPTBN4
GO:0030175	filopodium	2.25513	9	0.00869565	0.0282216	0.0498806	PODXL, IQGAP2, TENM2
GO:0015630	microtubule cytoskeleton	1.34001	3	0.00819672	0.0282783	0.0400167	CCNA1, APC2, TUBB4A, TUBB2B	CENPE, HMMR
GO:1903265	positive regulation of tumor necrosis factor-mediated signaling pathway	10.2734	5	0.00819672	0.0282789	0.0443774	HSPA1A, MMP8, LAPTM5
GO:2000767	positive regulation of cytoplasmic translation	2.20144	1	0.00813008	0.0285258	0.0285258	LIN28A
GO:0017080	sodium channel regulator activity	2.46561	8	0.00833565	0.0292358	0.0446237	SGK1	NOS1
GO:0045109	intermediate filament organization	6.60432	10	0.00858511	0.0294993	0.0358396	KRT9, NEFL, KLHL24
GO:0031115	negative regulation of microtubule polymerization	5.60367	2	0.00768823	0.0295982	0.0295982	TUBB4A	EML2
GO:0055117	regulation of cardiac muscle contraction	3.24423	2	0.00768823	0.0297095	0.0339708	GJA5	NOS1
GO:0030506	ankyrin binding	4.86634	1	0.00724638	0.0297095	0.0297095	SPTB	SCN5A, SPTBN4
GO:0010633	negative regulation of epithelial cell migration	4.74156	10	0.00858511	0.0317065	0.0398381	PTPRR, DUSP10
GO:0061635	regulation of protein complex stability	6.16403	2	0.0124612	0.0323071	0.0404419	SQSTM1, IRGM
GO:0043153	entrainment of circadian clock by photoperiod	1.54101	6	0.00830233	0.0330126	0.0377286	USP2
GO:0001889	liver development	4.10936	10	0.00858511	0.0331633	0.0470345	CEBPA, CITED2
GO:0050699	WW domain binding	3.24423	10	0.00858511	0.0331715	0.0414644		SCNN1B, SCNN1G
GO:0043565	sequence-specific DNA binding	2.30001	4	0.00803537	0.0333384	0.0423836	BCL6, NR5A2, GSC2, MMP12, EOMES, MAFB, NR1H4, LEF1, GZF1, SCX	EGR1, FOXL1, GLI2, SATB1, GRHL1
GO:0005921	gap junction	5.60367	4	0.00803537	0.0338714	0.0383774	GJA5, GJC2
GO:0090160	Golgi to lysosome transport	2.80183	1	0.00787402	0.0338714	0.0338714	LAPTM5
GO:0045198	establishment of epithelial cell apical/basal polarity	6.16403	1	0.00724638	0.0338714	0.0338714		MYO9A, SH3BP1
GO:0043034	costamere	5.60367	1	0.00724638	0.0338714	0.0338714	SYNM	ANK3
GO:0004715	non-membrane spanning protein tyrosine kinase activity	1.10072	10	0.00858511	0.0351034	0.0435231	LCK
GO:0031295	T cell costimulation	2.12553	10	0.00858511	0.0351034	0.0435231	LCK	KLRK1
GO:0046427	positive regulation of receptor signaling pathway via JAK-STAT	4.25106	10	0.00858511	0.0351034	0.0435231	IL6, KIT	CYP1B1, IL10RB
GO:0006511	ubiquitin-dependent protein catabolic process	0.501141	10	0.00858511	0.0353165	0.0489488	ARRB1, SQSTM1
GO:0005765	lysosomal membrane	1.69511	3	0.00819672	0.035332	0.035332	ARRB1, CLCN7, CTNS, LAPTM5, SLC29A3, MCOLN1, ABHD6, FLCN, GPR137C, IRGM	IFITM1
GO:0001764	neuron migration	4.74156	5	0.00819672	0.0354108	0.0431432	CCK, NR4A2, RELN, TUBB2B	MEF2C, SEMA3A
GO:0035035	histone acetyltransferase binding	3.85252	10	0.00858511	0.0355018	0.0495735	CITED2	EGR1
GO:1900182	positive regulation of protein localization to nucleus	1.92626	7	0.00819672	0.0356263	0.0478202	TFRC	NGFR
GO:0006355	regulation of DNA-templated transcription	1.11064	7	0.00900901	0.0357691	0.0434339	CEBPA, DDIT3, NR5A2, NFATC2, MAFB, MAFA	GLI2, MEF2C
GO:0051092	positive regulation of NF-kappaB transcription factor activity	1.4913	8	0.00885233	0.0361889	0.0499055	HSPA1A, IL6, TFRC, TLR4, CARD9	RIPK3
GO:0005096	GTPase activator activity	2.05468	4	0.00841287	0.0362303	0.043802	ARRB1, PLCB1, ELMOD1, FLCN, ARHGAP30	NCKAP1L, MYO9A, RGS5, SH3BP1
GO:0016324	apical plasma membrane	2.07443	1	0.00819672	0.0369739	0.0369739	IL6R, PODXL, SLC6A6, SLC6A9, SLC22A3, STX3, TEK, CUBN, SLC6A14, ATP6V0A4, RAPGEF6, SLC4A11	SCNN1B, SCNN1G
GO:0006882	intracellular zinc ion homeostasis	4.10936	2	0.00821034	0.0370067	0.0417856	LCK, MT3
GO:0051015	actin filament binding	1.92626	4	0.00841287	0.037315	0.0423802	SPTB, IQGAP2, AIF1L, ESPNL	FMNL1, CORO1A
GO:0017124	SH3 domain binding	1.92626	9	0.00869565	0.0374551	0.0470675	WIPF1, MYPN	SKAP1
GO:2001240	negative regulation of extrinsic apoptotic signaling pathway in absence of ligand	3.24423	2	0.00768823	0.0384442	0.046494	CSF2, HSPA1A
GO:0035025	positive regulation of Rho protein signal transduction	3.24423	4	0.0081634	0.0384442	0.046494	ARRB1, TEK
GO:0043923	positive regulation by host of viral transcription	1.81295	2	0.00844619	0.0387491	0.0428811	LEF1
GO:0090090	negative regulation of canonical Wnt signaling pathway	1.81295	1	0.00847458	0.039053	0.039053	DDIT3, FRZB, APC2, HECW1, GREM1	PRICKLE1
GO:0005874	microtubule	1.40092	3	0.00847458	0.0391115	0.0437728	TUBB4A, TUBB2B	CENPE, TTLL1
GO:0008092	cytoskeletal protein binding	4.40288	1	0.00847458	0.0392536	0.0392536	FABP3, MYPN	ANK3, CORO1A
GO:1990782	protein tyrosine kinase binding	2.05468	7	0.00847458	0.0398044	0.0466072	CD247, BLNK
GO:0043523	regulation of neuron apoptotic process	3.42446	7	0.00900901	0.0398106	0.0482		EGR1, MEF2C
GO:0044295	axonal growth cone	4.74156	1	0.00847458	0.0407703	0.0407703	KIF5C	MYO9A
GO:0030315	T-tubule	2.68001	6	0.00900901	0.040812	0.040812		ANK3, SCN5A
GO:0032722	positive regulation of chemokine production	6.53761	2	0.0081743	0.0410091	0.0457919	CSF1R, HMOX1, IL6, IL6R, TLR4	ALOX15B, EGR1
GO:0001772	immunological synapse	2.80183	2	0.0081743	0.0410091	0.0457919	LCK	SKAP1, CORO1A
GO:0004857	enzyme inhibitor activity	4.40288	5	0.00869565	0.0410813	0.0474927	ARRB1, SCG5, FLCN	ANGPTL4
GO:0140311	protein sequestering activity	2.37078	8	0.00909166	0.0422096	0.0483167	LAPTM5, SQSTM1
GO:0002027	regulation of heart rate	1.23281	1	0.00724638	0.0422096	0.0422096		SCN5A
GO:0004869	cysteine-type endopeptidase inhibitor activity	4.10936	4	0.00830233	0.0422659	0.049166	SERPINB13, SERPINB3
GO:0010951	negative regulation of endopeptidase activity	5.77878	4	0.00856955	0.0422659	0.049166	SERPINB13, SERPINB3	SERPINE1
GO:0000423	mitophagy	2.05468	3	0.00847458	0.0422659	0.0483039	SQSTM1
GO:0031464	Cul4A-RING E3 ubiquitin ligase complex	2.20144	10	0.00858511	0.0422754	0.047543		DET1
GO:0050870	positive regulation of T cell activation	2.20144	2	0.00833565	0.0422754	0.0422754	LCK
GO:0060045	positive regulation of cardiac muscle cell proliferation	3.24423	1	0.00900901	0.0424931	0.0424931		MEF2C, ZFPM2
GO:0032006	regulation of TOR signaling	5.13669	7	0.00869565	0.0428356	0.0473306	ROS1, FLCN
GO:0042127	regulation of cell population proliferation	1.38001	2	0.00895273	0.043206	0.043206	KIT, SGK1, TFRC
GO:0016529	sarcoplasmic reticulum	4.40288	7	0.00869565	0.0432774	0.0499055		ANK3, NOS1, THBS4
GO:2001238	positive regulation of extrinsic apoptotic signaling pathway	2.68001	7	0.00869565	0.0432774	0.0499055	GPER1, TLR4
GO:0043123	positive regulation of canonical NF-kappaB signal transduction	0.970714	7	0.00869565	0.0432774	0.0499055	S100A4, TFRC, TLR4, CARD9
GO:0045121	membrane raft	0.941074	3	0.00819672	0.0440311	0.0473835	LCK, TEK	NOS1, NTSR1
GO:0050796	regulation of insulin secretion	3.73578	1	0.00847458	0.0455657	0.0455657	IL6, NOS2	GIPR, PER2
GO:0070300	phosphatidic acid binding	4.20275	3	0.00813008	0.0463408	0.0499055	RAPGEF6, SMPD3	CIDEA
GO:0051310	metaphase chromosome alignment	5.13669	3	0.00819672	0.0466133	0.0466133	GEM	CENPE
GO:0043627	response to estrogen	1.46763	1	0.00900901	0.0472986	0.0472986	CITED2
GO:0000785	chromatin	0.483454	1	0.00900901	0.0472986	0.0472986	ARRB1, CITED2, PLCB1	EGR1
GO:0004402	histone acetyltransferase activity	1.40092	1	0.00900901	0.0472986	0.0472986	ARRB1
GO:0043525	positive regulation of neuron apoptotic process	2.56835	1	0.00847458	0.0478393	0.0478393	DDIT3, NUPR1
GO:0006986	response to unfolded protein	2.56835	1	0.00847458	0.0478393	0.0478393	DDIT3, HSPA1A
GO:0140416	transcription regulator inhibitor activity	3.85252	2	0.00882444	0.0478393	0.0480896	DDIT3, HSPA1A, LEF1
GO:0051607	defense response to virus	1.81295	3	0.00847458	0.0480284	0.0498224	IL6, NLRC5	RIPK3, APOBEC3G, APOBEC3D, APOBEC3H, APOBEC3A
GO:0030054	cell junction	1.83696	3	0.00847458	0.049185	0.049185	CDH2, HOXC5, NEU1, PTPRR, CLDN9, P2RX6, TENM2, SLC16A10, PLEKHA7
GO:0030027	lamellipodium	1.55396	3	0.00869565	0.0498224	0.0498224	CDH2, PODXL, STX3, IQGAP2	CORO1A, SH3BP1
GO:0072686	mitotic spindle	1.79535	1	0.00917431	0.0499151	0.0499151	GEM, TUBB4A, FLCN, TUBB2B	CENPE, EML2

## Sheet: Table 3c
ID	Term_Description	Fold_Enrichment	occurrence	support	lowest_p	highest_p	Up_regulated	Down_regulated
GO:0006935	chemotaxis	9.39898	10	0.0108696	1.56171e-08	1.56171e-08	CXCL1, CXCL2, CXCL8, CXCL10, PLAU, CCL20, CXCL11
GO:0033209	tumor necrosis factor-mediated signaling pathway	14.2169	10	0.0891704	2.94709e-08	0.000324703	BIRC3, NFKBIA, TNF, TNFRSF1B, CARD14
GO:0008009	chemokine activity	17.9028	10	0.0108696	7.40291e-08	7.40291e-08	CXCL3, CXCL8, CXCL10, CCL5, CXCL11
GO:0140313	molecular sequestering activity	25.7801	10	0.0919026	1.64435e-07	0.000102252	C1R, NFKBIA, SQSTM1, XAF1
GO:0007249	canonical NF-kappaB signal transduction	16.1125	10	0.0830889	2.18925e-06	4.69556e-06	ADAM8, BIRC3, IRAK2, NFKB2, NFKBIA
GO:0071222	cellular response to lipopolysaccharide	11.3736	10	0.0311741	3.41575e-06	0.000475889	GBP2, IL6, CXCL8, CXCL10, MMP9, TNFAIP3, TNFRSF1B, NOD2, TNIP3, ZC3H12A
GO:0070098	chemokine-mediated signaling pathway	24.1688	10	0.010929	3.50277e-06	3.50277e-06	CXCL10, CCL5, CXCL11
GO:2000406	positive regulation of T cell migration	20.7161	10	0.0108696	4.34547e-06	4.34547e-06	CXCL10, CCL5, CCL20
GO:0004867	serine-type endopeptidase inhibitor activity	17.9028	10	0.015889	9.98636e-06	0.00382366	SERPINA3, SERPINB2, SERPINA1, SERPINB4, WFDC2
GO:0051092	positive regulation of NF-kappaB transcription factor activity	7.01675	10	0.0237495	1.15718e-05	0.00431536	IL6, IRAK2, S100A9, TLR2, TNF, TRAF1, TRIM22, NOD2, CARD14
GO:0045785	positive regulation of cell adhesion	16.9182	10	0.0108993	1.56089e-05	0.0397758	ADAM8, ZFHX3, PTPRJ, SAA1, CCL5, TGM2, TNF
GO:0032088	negative regulation of NF-kappaB transcription factor activity	5.37085	10	0.00596756	2.08431e-05	0.00351239	IRAK2, NFKBIA, TNFAIP3, ZC3H12A
GO:0002755	MyD88-dependent toll-like receptor signaling pathway	13.8107	10	0.0205128	2.08431e-05	0.0046809	IRAK2, TNIP1
GO:0043130	ubiquitin binding	5.57742	10	0.0343422	2.14591e-05	0.00424845	TNFAIP3, SQSTM1, NOD2
GO:0043124	negative regulation of canonical NF-kappaB signal transduction	10.0703	10	0.0597841	3.15435e-05	0.000393483	NFKBIA, TNFAIP3, TNIP1, TNIP3, ZC3H12A
GO:0070498	interleukin-1-mediated signaling pathway	9.20716	10	0.0217391	5.07009e-05	0.0157769	IRAK2, NFKBIA
GO:0007267	cell-cell signaling	5.62065	10	0.010929	5.84967e-05	5.84967e-05	CD70, INHBA, CXCL10, LTB, S100A9, CCL5, CCL20, CXCL11, IL36G	TRHDE
GO:0006915	apoptotic process	3.69459	10	0.010563	7.57833e-05	0.0419067	IRF1, MX1, NFKBIA, TLR2, BBC3	FOXO1
GO:0050729	positive regulation of inflammatory response	9.66752	10	0.0439574	7.75551e-05	0.00414194	IFI35, NFKBIA, S100A9, TLR2, TNF, TNIP1, NFKBIZ
GO:0038061	non-canonical NF-kappaB signal transduction	10.7417	10	0.0680433	8.07246e-05	0.000158645	BIRC3, NFKBIA
GO:0043122	regulation of canonical NF-kappaB signal transduction	10.1763	10	0.0343422	0.00015829	0.0131269	TNF, SQSTM1
GO:0002020	protease binding	6.66726	10	0.0178121	0.000173872	0.010225	CD70, SERPINA1, SERPINB3, SERPINB4, TNF, TNFAIP3
GO:0034142	toll-like receptor 4 signaling pathway	15.468	10	0.0217985	0.000375191	0.00851828	IRAK2, NFKBIA, OAS1, TNIP3
GO:0043123	positive regulation of canonical NF-kappaB signal transduction	3.80611	10	0.0217391	0.000398844	0.00200634	BIRC3, CD74, TNF, TRIM22, NOD2
GO:0008201	heparin binding	3.97295	10	0.00543478	0.000491139	0.000491139	CXCL8, CXCL10, CXCL11
GO:0032715	negative regulation of interleukin-6 production	7.43655	10	0.0158445	0.000640853	0.041594	TNF, TNFAIP3, ZC3H12A
GO:0045071	negative regulation of viral genome replication	18.8635	10	0.0435971	0.000653594	0.00173248	MX1, OAS1, CCL5, TNF, IFITM1, TNIP1, RSAD2, APOBEC3A
GO:0006952	defense response	15.3801	10	0.0205128	0.0010065	0.0464651	INHBA, MX1, MX2, IL32, CD83, TNIP1, NOD2
GO:1901224	positive regulation of non-canonical NF-kappaB signal transduction	10.2846	10	0.021126	0.0012044	0.0459749	IFI35, TLR2, TNF, IL23A, NOD2
GO:0010818	T cell chemotaxis	19.335	10	0.00543478	0.00138917	0.00138917	CXCL10, CXCL11
GO:0000785	chromatin	1.51647	10	0.00543478	0.00141672	0.00827625	IRF1, IRF7, RELB, TGM2
GO:0045744	negative regulation of G protein-coupled receptor signaling pathway	17.5773	10	0.00543478	0.00148542	0.00148542	CXCL8, CCL5
GO:0042119	neutrophil activation	14.8731	10	0.0108696	0.00187197	0.00187197	CXCL8, CCL5
GO:0045087	innate immune response	7.63225	10	0.0108993	0.00200634	0.0384229	IRF7, LCN2, MX1, TLR2, UBA7, VNN1, N4BP3, NOD2, APOBEC3A
GO:0051770	positive regulation of nitric-oxide synthase biosynthetic process	19.335	4	0.00539119	0.00200634	0.00842388	TLR2, NOD2
GO:0042834	peptidoglycan binding	14.8731	4	0.00539119	0.00200634	0.00842388	TLR2, NOD2
GO:0050700	CARD domain binding	16.1125	2	0.00528149	0.00200634	0.00200634	NOD2, CARD14
GO:0031093	platelet alpha granule lumen	4.46193	10	0.00543478	0.00207175	0.00495179	SERPINA3, PDGFB, SERPINA1
GO:0031625	ubiquitin protein ligase binding	2.71778	10	0.0264075	0.00255391	0.00455726	FHIT, NFKBIA, TNFRSF1B, TRAF1, SQSTM1, LOC102724560	FOXO1
GO:0045732	positive regulation of protein catabolic process	5.37085	8	0.00833333	0.00281808	0.0434883	TNF, TNFAIP3	FOXO1
GO:0090026	positive regulation of monocyte chemotaxis	10.7417	10	0.010929	0.00300211	0.00300211	CXCL10, CCL5
GO:0044344	cellular response to fibroblast growth factor stimulus	10.7417	10	0.00543478	0.00300211	0.00300211	CXCL8, CCL5
GO:0035723	interleukin-15-mediated signaling pathway	9.66752	10	0.00543478	0.00336955	0.00842388	STAT5A
GO:0150078	positive regulation of neuroinflammatory response	17.5773	5	0.00526316	0.00336955	0.00449128	IL6, TNF
GO:0006954	inflammatory response	7.31157	10	0.00846829	0.00336955	0.0287754	ADAM8, ELF3, IL6, CXCL8, IRAK2, S100A9, TNF, VNN1, HDAC9
GO:1904996	positive regulation of leukocyte adhesion to vascular endothelial cell	14.8731	5	0.00534759	0.00336955	0.00449128	IL6, TNF
GO:0070102	interleukin-6-mediated signaling pathway	7.43655	10	0.00543478	0.00336955	0.00842388	IL6
GO:0010508	positive regulation of autophagy	6.23711	10	0.0238702	0.00362316	0.0362703	SQSTM1, TRIM22, ZC3H12A	FOXO1
GO:0050768	negative regulation of neurogenesis	12.89	5	0.00526316	0.00377883	0.00503652	IL6, TNF
GO:0038187	pattern recognition receptor activity	9.66752	4	0.00539119	0.0041856	0.0136657	TLR2, NOD2
GO:0051607	defense response to virus	9.74876	8	0.00546448	0.00418659	0.00431536	GBP2, IL6, IRF1, IRF7, MX1, MX2, OAS1, TLR2, RSAD2, GBP5, APOBEC3A, IFNL1
GO:0034551	mitochondrial respiratory chain complex III assembly	12.0844	10	0.00543478	0.00432389	0.00605238		LYRM7
GO:0051281	positive regulation of release of sequestered calcium ion into cytosol	8.40654	10	0.00543478	0.00454723	0.00454723	CXCL10, CXCL11
GO:0042056	chemoattractant activity	12.0844	10	0.0108696	0.00457835	0.00457835	CXCL10, PDGFB, CCL5
GO:0007186	G protein-coupled receptor signaling pathway	3.31729	10	0.0108696	0.0046368	0.0046368	C3, CCR10, CXCL1, CXCL8, CXCL10, CCL5, RGS11
GO:0002224	toll-like receptor signaling pathway	11.3736	7	0.00543478	0.0050284	0.0050284	CTSS, TLR2
GO:0009615	response to virus	9.66752	10	0.00546448	0.00518435	0.0121749	IRF7, MX1, MX2, OAS1, CCL5, TNF, IFITM1, TRIM22, IFNK, RSAD2
GO:0051044	positive regulation of membrane protein ectodomain proteolysis	22.3097	10	0.010929	0.00554458	0.0080935	ADAM8, TNF, TNFRSF1B
GO:0032869	cellular response to insulin stimulus	3.51546	4	0.00547982	0.00583354	0.0424371	HDAC9	FOXO1
GO:0010008	endosome membrane	1.09858	10	0.00543478	0.00599774	0.018832	IRAK2, IRF7
GO:0002753	cytoplasmic pattern recognition receptor signaling pathway	6.44501	9	0.00546448	0.00612416	0.0178576	IRF7
GO:0045672	positive regulation of osteoclast differentiation	19.335	1	0.00526316	0.00612416	0.00612416	CSF1, TNF, IL23A
GO:0035458	cellular response to interferon-beta	12.0844	3	0.00512821	0.00617116	0.00647705	IRF1, OAS1
GO:0043065	positive regulation of apoptotic process	3.17712	10	0.0184086	0.00624141	0.0253448	IL6, TGM2, TNF, SQSTM1, BMF	FOXO1, HOXA5
GO:1900017	positive regulation of cytokine production involved in inflammatory response	18.4143	10	0.0161736	0.00647227	0.0150345	IL6, TNF, NOD2, GBP5
GO:0070555	response to interleukin-1	4.02813	10	0.00543478	0.00660494	0.0184188	IRAK2
GO:0032481	positive regulation of type I interferon production	7.16113	10	0.0161736	0.00676022	0.0212712	IRF1, IRF7
GO:0034144	negative regulation of toll-like receptor 4 signaling pathway	6.90537	3	0.00534759	0.00702135	0.0140427	SQSTM1
GO:0000981	DNA-binding transcription factor activity, RNA polymerase II-specific	2.66079	8	0.00539119	0.0078915	0.0167918	ZFHX3, IRF1, IRF7
GO:0030593	neutrophil chemotaxis	10.0009	10	0.00543478	0.00795347	0.00795347	CXCL3, CXCL8, S100A9
GO:0035578	azurophil granule lumen	3.25872	10	0.00833333	0.00834158	0.0418651	SERPINA3, C3, SERPINB3
GO:0035456	response to interferon-beta	21.4834	5	0.00552486	0.00841669	0.0287754	IFITM1, XAF1
GO:0032728	positive regulation of interferon-beta production	12.0844	10	0.0215648	0.00848646	0.0232348	IRF1, IRF7, OAS1, TLR2
GO:0042981	regulation of apoptotic process	3.5369	10	0.00549467	0.00855872	0.013338	BIRC3, CXCL10, TGM2
GO:0140311	protein sequestering activity	7.43655	10	0.0653956	0.00856722	0.0166939	NFKBIA, SQSTM1
GO:0070530	K63-linked polyubiquitin modification-dependent protein binding	5.68678	2	0.00547982	0.0087908	0.0123009	SQSTM1
GO:0098586	cellular response to virus	15.6771	10	0.0108696	0.00895912	0.00895912	IL6, CXCL10, OAS1, POU2F2, CCL5, ZC3H12A
GO:0071347	cellular response to interleukin-1	10.4514	10	0.0107824	0.00895912	0.00895912	GBP2, CXCL8, CCL5, ZC3H12A
GO:0004252	serine-type endopeptidase activity	9.66752	10	0.0106108	0.00928628	0.0241356	ADAM8, CFB, C1R, C1S, CTSS, MMP9, PLAU, RHBDL2
GO:0045088	regulation of innate immune response	12.0844	10	0.015587	0.00932875	0.0128447	BIRC3, IRF1
GO:0035591	signaling adaptor activity	2.68542	1	0.00512821	0.00969668	0.00969668	IRAK2
GO:0042742	defense response to bacterium	5.68678	3	0.00543478	0.00977714	0.0321359	GBP2, LCN2, OAS1, S100A9, NOD2
GO:0043277	apoptotic cell clearance	8.05627	10	0.00543478	0.0101872	0.0142579	TGM2
GO:0046427	positive regulation of receptor signaling pathway via JAK-STAT	16.6681	5	0.00526316	0.0103373	0.0137705	HES1, IL6, CCL5, TNF, IFNL1
GO:0048661	positive regulation of smooth muscle cell proliferation	12.89	8	0.00833333	0.0103373	0.0416205	IL6, PDGFB, CCL5, TNF
GO:0050796	regulation of insulin secretion	8.78866	5	0.00526316	0.0103373	0.0137705	IL6, CCL5, TNF
GO:0032722	positive regulation of chemokine production	11.7182	10	0.0153846	0.0103373	0.028789	CD74, IL6, TLR2, TNF
GO:0007062	sister chromatid cohesion	6.90537	7	0.00543478	0.0104897	0.0104897	REC8
GO:0051321	meiotic cell cycle	5.68678	8	0.0108696	0.0104897	0.0209795	REC8
GO:0004896	cytokine receptor activity	20.7161	5	0.00546448	0.0106876	0.0424758	CD74, IL7R, EBI3
GO:0070374	positive regulation of ERK1 and ERK2 cascade	2.80218	1	0.00543478	0.0106876	0.0106876	CD74, ICAM1, PDGFB, NOD2
GO:0001774	microglial cell activation	6.44501	10	0.00543478	0.0113365	0.0194191	TNF
GO:0050918	positive chemotaxis	5.68678	1	0.00534759	0.0117996	0.0117996	PTPRJ
GO:0050860	negative regulation of T cell receptor signaling pathway	5.37085	1	0.00534759	0.0117996	0.0117996	PTPRJ
GO:1902176	negative regulation of oxidative stress-induced intrinsic apoptotic signaling pathway	7.43655	7	0.00543478	0.012038	0.012038	SOD2
GO:1902004	positive regulation of amyloid-beta formation	5.08817	10	0.00543478	0.0123009	0.0210662	TNF
GO:0032727	positive regulation of interferon-alpha production	5.08817	9	0.00543478	0.0124233	0.0178576	IRF7
GO:0034774	secretory granule lumen	2.5666	8	0.0108993	0.0124735	0.0298693	SERPINA3, C3, S100A9
GO:0003700	DNA-binding transcription factor activity	1.97296	9	0.0102564	0.012722	0.0149711	ELF3, NFKB2, POU2F2, STAT5A	FOXO1, HOXA5
GO:0140694	non-membrane-bounded organelle assembly	8.78866	10	0.00543478	0.012722	0.025444	SQSTM1
GO:0140036	ubiquitin-modified protein reader activity	8.78866	3	0.00512821	0.012722	0.0186491	SQSTM1
GO:0033558	protein lysine deacetylase activity	8.05627	7	0.00641026	0.0130424	0.0172653	HDAC9
GO:0016234	inclusion body	6.90537	3	0.00512821	0.0130424	0.0140229	SQSTM1
GO:0004407	histone deacetylase activity	5.68678	7	0.00641026	0.0130424	0.0172653	HDAC9
GO:0046426	negative regulation of receptor signaling pathway via JAK-STAT	8.05627	5	0.00526316	0.0130973	0.0130973	SOCS3
GO:0043232	intracellular non-membrane-bounded organelle	6.90537	7	0.0102564	0.0130973	0.0151095	SQSTM1
GO:0042826	histone deacetylase binding	2.35793	2	0.00512821	0.0140229	0.0143877	HES1, HDAC9
GO:0140297	DNA-binding transcription factor binding	1.44291	7	0.00534759	0.0141328	0.0172653	STAT5A, HDAC9
GO:0032691	negative regulation of interleukin-1 beta production	7.16113	5	0.00526316	0.0141812	0.0285066	TNFAIP3, ZC3H12A
GO:0060339	negative regulation of type I interferon-mediated signaling pathway	9.66752	10	0.0107824	0.0146185	0.0438556	OAS1, USP18
GO:0043507	positive regulation of JUN kinase activity	6.90537	10	0.00546448	0.0146306	0.0333899	TNF	DUSP19
GO:0045429	positive regulation of nitric oxide biosynthetic process	11.1548	10	0.0163489	0.0151317	0.0259019	ASS1, PTGS2, TNF
GO:0001934	positive regulation of protein phosphorylation	4.64041	7	0.0102564	0.0153493	0.0486286	C3, CD74, DAB2, MMP9, TNF, CARD14
GO:0051059	NF-kappaB binding	3.86701	10	0.0159161	0.0155589	0.0335682	NFKBIA
GO:0035556	intracellular signal transduction	3.26605	7	0.0108696	0.0156075	0.0194158	CXCL1, CXCL8, SQSTM1, NOD2	WNK4
GO:0008625	extrinsic apoptotic signaling pathway via death domain receptors	4.83376	5	0.00534759	0.0157769	0.018635	TNF
GO:1902042	negative regulation of extrinsic apoptotic signaling pathway via death domain receptors	9.20716	10	0.0157137	0.0157769	0.0180272	ICAM1, TNFAIP3
GO:0000423	mitophagy	6.44501	9	0.0108696	0.0162012	0.0162012	SQSTM1
GO:0004842	ubiquitin-protein transferase activity	1.62936	10	0.00547982	0.0165841	0.0343436	BIRC3, TNFAIP3, UBA7
GO:0002230	positive regulation of defense response to virus by host	12.6098	9	0.00543478	0.0166731	0.0203657	TRIM22, IL23A, ZC3H12A
GO:0007159	leukocyte cell-cell adhesion	12.6098	10	0.0383565	0.0170966	0.0180272	ICAM1, CCL5, TNIP1
GO:0031398	positive regulation of protein ubiquitination	2.01407	2	0.0078456	0.0173371	0.0173371	BIRC3
GO:0042307	positive regulation of protein import into nucleus	3.45269	10	0.0107824	0.017417	0.0419067	ZC3H12A
GO:0000118	histone deacetylase complex	3.58056	10	0.00596756	0.017726	0.0336013	HDAC9
GO:0045814	negative regulation of gene expression, epigenetic	3.45269	7	0.00641026	0.017726	0.0236346	HDAC9
GO:0061629	RNA polymerase II-specific DNA-binding transcription factor binding	1.24742	1	0.00512821	0.017726	0.017726	HES1, HDAC9
GO:0001227	DNA-binding transcription repressor activity, RNA polymerase II-specific	2.76215	1	0.00512821	0.017726	0.017726	ZFHX3, PRDM1, HES1, DEAF1, ETV7
GO:2000352	negative regulation of endothelial cell apoptotic process	7.16113	10	0.0109596	0.0180272	0.0180272	ICAM1, TNFAIP3
GO:0071356	cellular response to tumor necrosis factor	7.16113	10	0.00543478	0.0180723	0.0180723	GBP2, CXCL8, CCL5, ZC3H12A
GO:0051247	positive regulation of protein metabolic process	12.6098	4	0.00544963	0.0181777	0.0233568	CSF1, INHBA, NFKBIA
GO:0032731	positive regulation of interleukin-1 beta production	7.16113	6	0.00789064	0.0183155	0.0487825	IL6, TNF, NOD2, GBP5
GO:0001659	temperature homeostasis	19.335	6	0.00530538	0.018483	0.0360673	NOD2	FOXO1
GO:0061635	regulation of protein complex stability	9.66752	8	0.00539119	0.018483	0.0420686	SQSTM1
GO:0007189	adenylate cyclase-activating G protein-coupled receptor signaling pathway	3.39211	10	0.00543478	0.0190279	0.0190279	CXCL10, CXCL11
GO:2001240	negative regulation of extrinsic apoptotic signaling pathway in absence of ligand	10.1763	10	0.00543478	0.0192914	0.0318705	CSF2, TNF
GO:0031397	negative regulation of protein ubiquitination	4.39433	10	0.0326978	0.0193237	0.0290933	TNFAIP3, SQSTM1
GO:0033138	positive regulation of peptidyl-serine phosphorylation	4.11384	10	0.0079954	0.0193604	0.0464651	IL6, TNF
GO:0019221	cytokine-mediated signaling pathway	5.91889	5	0.00526316	0.019436	0.0258788	IL6, PTPRJ, IFNK
GO:0042531	positive regulation of tyrosine phosphorylation of STAT protein	15.1647	5	0.00526316	0.0195613	0.026044	CSF2, HES1, IL6, CCL5, TNF, IL20, IL23A, IFNL1
GO:0010884	positive regulation of lipid storage	17.5773	10	0.00543478	0.0208186	0.0420103	C3, ZC3H12A
GO:0006473	protein acetylation	7.43655	3	0.00512821	0.0208186	0.0280069		FOXO1
GO:0032757	positive regulation of interleukin-8 production	8.05627	6	0.0106108	0.0208969	0.0474593	CD74, IL6, TLR2, TNF, NOD2
GO:0003779	actin binding	1.62479	7	0.00543478	0.0218508	0.0218508	SYNPO, NOD2
GO:0007166	cell surface receptor signaling pathway	3.92989	1	0.00543478	0.0219872	0.0219872	BIRC3, IL7R, INHBA, CXCL10, IFITM1
GO:0005080	protein kinase C binding	5.5243	10	0.0109893	0.0222802	0.0320255	SQSTM1, HDAC9
GO:0031965	nuclear membrane	1.12413	10	0.00543478	0.0223921	0.0223921	MX1, DTX2
GO:0018149	peptide cross-linking	9.20716	9	0.0102564	0.0224641	0.0387902	SPRR2E, TGM2
GO:0005509	calcium ion binding	2.67305	6	0.00544963	0.0224641	0.0390335	ADAM8, C1R, GRIN1, S100A9, TGM2	ENPP2
GO:0140374	antiviral innate immune response	10.9858	10	0.0161736	0.0227307	0.0335519	CXCL10, MX1, OAS1, TNF, USP18
GO:1903078	positive regulation of protein localization to plasma membrane	4.20327	10	0.0108993	0.0227307	0.0459749	TNF, SQSTM1
GO:0005125	cytokine activity	11.0939	5	0.00526316	0.0230875	0.0307298	CD70, CSF1, CSF2, CSF3, IL6, INHBA, TNF
GO:0072332	intrinsic apoptotic signaling pathway by p53 class mediator	5.37085	2	0.00519568	0.0234992	0.0268435	FHIT
GO:0007131	reciprocal meiotic recombination	5.37085	10	0.00543478	0.0235991	0.0235991	REC8
GO:1904724	tertiary granule lumen	7.16113	10	0.00543478	0.023633	0.023633	CTSS, FOLR3, CXCL1, MMP9
GO:0140693	molecular condensate scaffold activity	2.47885	9	0.00543478	0.0243246	0.0296977	SQSTM1
GO:0051894	positive regulation of focal adhesion assembly	5.08817	1	0.00526316	0.0245896	0.0245896	PTPRJ
GO:0042127	regulation of cell population proliferation	2.88583	10	0.00543478	0.0249359	0.0249359	CXCL10, CXCL11
GO:0030544	Hsp70 protein binding	6.66726	3	0.00512821	0.0250424	0.0488912	NOD2, RNF207
GO:0061844	antimicrobial humoral immune response mediated by antimicrobial peptide	2.41688	2	0.00528149	0.0252273	0.0252273	S100A9
GO:0035235	ionotropic glutamate receptor signaling pathway	9.66752	10	0.00543478	0.025585	0.0362521	GRIN1
GO:0008542	visual learning	8.78866	10	0.00543478	0.025585	0.0362521	GRIN1
GO:2001244	positive regulation of intrinsic apoptotic signaling pathway	8.40654	10	0.0106979	0.0258398	0.0387838	S100A9, BBC3
GO:0002407	dendritic cell chemotaxis	6.44501	3	0.00534759	0.0264217	0.0331882	CCL5
GO:0004435	phosphatidylinositol phospholipase C activity	5.37085	3	0.00534759	0.0264217	0.0331882	CCL5
GO:0051928	positive regulation of calcium ion transport	5.08817	3	0.00534759	0.0264217	0.0331882	CCL5
GO:0001772	immunological synapse	2.92955	1	0.00534759	0.0270987	0.0270987	PTPRJ
GO:0001516	prostaglandin biosynthetic process	14.8731	10	0.00543478	0.027189	0.0362521	CD74, PTGS2
GO:0050830	defense response to Gram-positive bacterium	4.39433	1	0.00512821	0.0274152	0.0274152	IL6, SPRR2A, TLR2
GO:0031334	positive regulation of protein-containing complex assembly	4.49652	10	0.00544963	0.0277407	0.0474406	TNF, BMF
GO:0032755	positive regulation of interleukin-6 production	7.83853	5	0.00534759	0.0283436	0.0427376	CD74, IL6, POU2F2, TLR2, TNF, NOD2
GO:0031982	vesicle	1.289	2	0.00528149	0.0283436	0.0283436	NOD2
GO:0045600	positive regulation of fat cell differentiation	2.61284	2	0.00528149	0.0285066	0.0285066	ZC3H12A
GO:0032720	negative regulation of tumor necrosis factor production	3.94593	5	0.00526316	0.0285066	0.0404659	TNFAIP3, ZC3H12A
GO:0016579	protein deubiquitination	3.64812	5	0.00526316	0.0285066	0.0434883	TNFAIP3, ZC3H12A
GO:0050727	regulation of inflammatory response	6.17076	10	0.0203106	0.0287389	0.0350778	BIRC3, USP18, IL20
GO:0051019	mitogen-activated protein kinase binding	11.3736	2	0.00540604	0.0293583	0.0391271	PTPRJ, TNIP1
GO:0090050	positive regulation of cell migration involved in sprouting angiogenesis	8.40654	10	0.00543478	0.0294292	0.0387838	PTGS2, HDAC9
GO:0050852	T cell receptor signaling pathway	4.91569	4	0.00593737	0.0294293	0.0490634	PTPRJ, NFKBIZ, ZC3H12A
GO:0008286	insulin receptor signaling pathway	2.68542	4	0.00544963	0.030107	0.0386703		FOXO1
GO:0032760	positive regulation of tumor necrosis factor production	7.16113	2	0.00528149	0.0310028	0.0310028	IL6, OAS1, PTPRJ, TLR2, IL23A, NOD2
GO:0006887	exocytosis	4.39433	3	0.00534759	0.0320807	0.0402892	CCL5
GO:0034341	response to type II interferon	9.20716	6	0.00544963	0.0323795	0.0486286	CD74, IFITM1
GO:0005776	autophagosome	2.14834	9	0.00552486	0.0337816	0.0337816	SQSTM1
GO:0016236	macroautophagy	1.85914	9	0.00552486	0.0337816	0.0337816	SQSTM1
GO:0006914	autophagy	3.45269	9	0.00543478	0.0337816	0.0337816	S100A9, SQSTM1
GO:0010575	positive regulation of vascular endothelial growth factor production	10.3581	10	0.00544963	0.0349511	0.0494853	C3, IL6, PTGS2
GO:0034599	cellular response to oxidative stress	4.20327	2	0.00528149	0.0354295	0.0354295	SOD2, ZC3H12A	FOXO1
GO:0004843	cysteine-type deubiquitinase activity	3.86701	9	0.00546448	0.0354295	0.0472394	TNFAIP3, USP18, ZC3H12A
GO:1903077	negative regulation of protein localization to plasma membrane	8.78866	1	0.00512821	0.0355294	0.0355294	DAB2	WNK4
GO:0043154	negative regulation of cysteine-type endopeptidase activity involved in apoptotic process	2.41688	5	0.00534759	0.0367457	0.0433769	TNF
GO:0043280	positive regulation of cysteine-type endopeptidase activity involved in apoptotic process	2.35793	5	0.00534759	0.0367457	0.0433769	TNF
GO:1902895	positive regulation of miRNA transcription	4.60358	1	0.00543478	0.0376913	0.0376913	PDGFB, TNF
GO:0000932	P-body	3.39211	9	0.00546448	0.0384407	0.046907	SQSTM1, ZC3H12A
GO:0009898	cytoplasmic side of plasma membrane	1.12413	3	0.00534759	0.0399637	0.0399637	SOCS3
GO:0051091	positive regulation of DNA-binding transcription factor activity	3.33363	3	0.00534759	0.0399637	0.0399637	IL6, TNF, TRIM22
GO:0035987	endodermal cell differentiation	7.16113	8	0.00539119	0.0404419	0.0431699	INHBA, MMP9
GO:0003682	chromatin binding	1.05656	2	0.00528149	0.0410941	0.0425377	ZC3H12A	FOXO1
GO:0005667	transcription regulator complex	2.38704	2	0.00593737	0.041243	0.041243	ZFHX3, HDAC9
GO:0006469	negative regulation of protein kinase activity	2.30179	2	0.00528149	0.0415417	0.0415417		DUSP19
GO:0006412	translation	3.22251	4	0.00547982	0.0416205	0.0416205	TNIP1
GO:0043406	positive regulation of MAP kinase activity	3.79118	1	0.00543478	0.0417358	0.0417358	PDGFB, TNF
GO:0042605	peptide antigen binding	8.05627	1	0.00543478	0.0425409	0.0425409	HLA-F, TAP1
GO:0010718	positive regulation of epithelial to mesenchymal transition	8.40654	1	0.00526316	0.0443725	0.0443725	ADAM8, DAB2, IL6, SERPINB3
GO:0030971	receptor tyrosine kinase binding	3.0211	2	0.00519568	0.0460095	0.0482191	SQSTM1
GO:0045599	negative regulation of fat cell differentiation	2.92955	1	0.00543478	0.0467178	0.0467178		FOXO1
GO:0006974	DNA damage response	1.30642	1	0.00543478	0.0467178	0.0467178	IRF7, ZC3H12A	FOXO1
GO:0005811	lipid droplet	2.68542	7	0.00543478	0.0467188	0.0467188	G0S2, RSAD2
GO:0006919	activation of cysteine-type endopeptidase activity involved in apoptotic process	3.71828	5	0.00526316	0.0467591	0.0493568	S100A9, TNF
GO:0006355	regulation of DNA-templated transcription	1.7419	10	0.00543478	0.0474402	0.0494115	ZFHX3, NFKB2, TRIM22, IFNK

## Sheet: Table 3d
ID	Term_Description	Fold_Enrichment	occurrence	support	lowest_p	highest_p	Up_regulated	Down_regulated
GO:0090575	RNA polymerase II transcription regulator complex	2.41688	10	0.0477955	5.63786e-14	4.97019e-12	ATF3, CEBPB, DDIT3, NFIL3, PBX1, STAT1, MAFB, BACH2, BATF2, JDP2	FOS, STAT4
GO:0051607	defense response to virus	6.16068	10	0.142455	1.73762e-10	1.30443e-09	IFI6, IFI16, IFI27, IFNB1, IL6, IRF1, IRF7, MX1, MX2, MYD88, OAS1, OAS2, OAS3, PLSCR1, EIF2AK2, STAT1, STAT2, TLR2, OASL, ISG15, IFI44L, IFIT5, SAMHD1, NT5C3A, ZNFX1, RTP4, IFIH1, ZBP1, NLRC5, TRIM5, RSAD2, GBP5, IFNL3, IFNL1, IFNE
GO:0005819	spindle	2.32737	10	0.0758657	2.74526e-09	6.07812e-06		HMMR, INCENP, KIF11, AURKA, TTK, KIF20A, PSRC1
GO:0006468	protein phosphorylation	1.35137	10	0.0198894	3.21773e-08	5.0074e-05	CAMK2A, IRAK2, MYLK, EIF2AK2, RET, NUAK1, MERTK, MAP4K1, SIK3, ADM2	CDK1, JAK3, PRKACB, MAPK4, AURKA, WNT11, SGK3, WNK4
GO:0045071	negative regulation of viral genome replication	9.19593	10	0.13449	5.38451e-08	3.57248e-07	IFI16, IFIT1, IFNB1, MX1, OAS1, OAS3, PLSCR1, EIF2AK2, TNF, IFITM1, OASL, ISG15, IFIT5, ZNFX1, IFIH1, RSAD2, IFNL3	TRIM6
GO:0009615	response to virus	4.60819	10	0.0870737	1.4226e-07	2.1595e-07	GATA3, IFIT2, IFIT1, IFIT3, IRF7, MX1, MX2, OAS1, OAS2, OAS3, EIF2AK2, CCL22, TNF, IFITM1, OASL, NMI, ISG15, TRIM22, IFIH1, DHX58, RSAD2	HYAL1
GO:0140374	antiviral innate immune response	6.18868	10	0.0774686	1.6029e-07	4.02011e-07	IFIT2, IFIT1, IFIT3, CXCL10, MX1, OAS1, EIF2AK2, TNF, TRIM25, USP18, ZDHHC11, ZBP1	TRIM6
GO:0051092	positive regulation of NF-kappaB transcription factor activity	2.70275	10	0.0610233	2.10424e-07	5.87148e-07	CAMK2A, IL6, IRAK2, LGALS9, MYD88, EIF2AK2, TFRC, TLR2, TNF, TRIM25, TRIM14, TRIM22, CLEC7A, TRIM5, NLRP3	CD40
GO:0043123	positive regulation of canonical NF-kappaB signal transduction	1.97918	10	0.0168618	2.10424e-07	5.87148e-07	CD36, MYD88, TFRC, TNF, TRIM25, TNFSF10, TRIM22, NFAT5, IFIT5, CLEC7A, TRIM5	CD40
GO:0015630	microtubule cytoskeleton	1.82142	10	0.0801458	3.78135e-07	6.07812e-06	KLF4, NUAK1, MTUS1	CENPE, HMMR, INCENP, AURKA, CCNB2, TUBA1B, KIF2C, KIF18A, PSRC1
GO:0000981	DNA-binding transcription factor activity, RNA polymerase II-specific	3.07469	10	0.0707813	3.9848e-07	0.000221709	CEBPB, GATA3, IRF1, IRF7, MYC, PBX1, SP100, STAT1, STAT2, TFAP4, KLF2, HEY1, HEY2	HAND2, ARNT2, HEYL
GO:0000976	transcription cis-regulatory region binding	2.37323	10	0.0766649	4.22006e-07	1.95177e-05	AHR, ATF3, CEBPB, DDIT3, GATA3, IRF1, CIITA, PBX1, POU2F2, TFAP4, TNF, PAX8, FOXH1, KLF4, KLF15	CRY2, FOS, FOXA1, TCF7, PER2, HAND2, CREB3L2, ZBTB46
GO:0019005	SCF ubiquitin ligase complex	2.61829	10	0.0135607	6.92926e-07	3.93189e-06	TRIM21, FBXO2, FBXO25, FBXO32
GO:0072686	mitotic spindle	1.22017	10	0.0298302	1.75984e-06	0.00176392	FLCN	CDK1, CENPE, KIF11, AURKA, DLGAP5
GO:0000776	kinetochore	1.8665	10	0.0494854	1.75984e-06	0.00631966		BUB1, CENPE, INCENP, NDC80, KIF2C, HJURP, SPC25, NUF2, SPC24
GO:0001227	DNA-binding transcription repressor activity, RNA polymerase II-specific	2.15448	10	0.0339643	1.79278e-06	0.000461721	ATF3, PRDM1, CEBPB, GATA3, HIC1, MXD1, MYC, NFIL3, HEY1, HEY2, ZBTB32, ZNF219, ETV7, JPH2, JDP2	HEYL, ZBTB46, SAMD11
GO:0007080	mitotic metaphase chromosome alignment	2.92274	10	0.0328042	2.12803e-06	8.57388e-05		CENPE, KIF14, PIBF1, KIF2C, KIF18A, PSRC1
GO:0000785	chromatin	1.39642	10	0.0322594	3.50859e-06	0.000557373	GATA3, HIC1, IRF1, IRF7, MXD1, MYC, STAT1, TGM2, FOXH1, KLF4, KLF2, CITED2, FAM47E	HAND2, MAGED1, NPM2, ZBTB46
GO:0018149	peptide cross-linking	5.98466	10	0.0594221	4.02885e-06	1.01202e-05	FN1, SPRR1A, SPRR2E, TGM1, TGM2, THBS1
GO:0001228	DNA-binding transcription activator activity, RNA polymerase II-specific	1.73297	10	0.0634674	4.46991e-06	0.000112091	ATF3, KLF6, DDIT3, GATA3, IRF1, IRF4, MITF, MYC, NOTCH1, PLSCR1, TFAP4, NR4A3, KLF4, NFAT5, KLF15, CREBRF, SCX	FOS, FOXA1, HOXA5, SALL2, BARX2, HAND2
GO:0002753	cytoplasmic pattern recognition receptor signaling pathway	5.58568	10	0.0373467	4.47389e-06	8.94778e-06	IRF7, TRIM25, IFIH1, DHX58
GO:0008608	attachment of spindle microtubules to kinetochore	8.37852	10	0.0488454	5.6339e-06	6.61678e-05		NDC80, SPC25, NUF2, SPC24
GO:0008017	microtubule binding	1.45013	10	0.0164488	5.74073e-06	0.0123728	NEFH, GJB6, FSD1	CENPE, KIF14, NDC80, KIF18A, NUF2, PSRC1
GO:0030496	midbody	1.51785	10	0.177828	6.8467e-06	0.000652473	CPEB3, FLCN	CDK1, CENPE, INCENP, AURKA, KIF14, KIF20A, ANLN, PSRC1
GO:0016567	protein ubiquitination	1.45292	10	0.0283816	8.0685e-06	0.00114585	TRIM21, ABCB11, FBXO2, FBXO25, HERC5, ASB2, KLHL24, RNF213, FBXO32, RNF152	UBE2C, ARRDC4
GO:0042752	regulation of circadian rhythm	2.13013	10	0.101705	8.68147e-06	4.31446e-05	PML	CDK1, CRY2, PER1, TOP2A, PER2
GO:0003700	DNA-binding transcription factor activity	1.99489	10	0.0276072	8.80461e-06	0.00034728	AHR, ATF3, DDIT3, GATA3, HIC1, IRF4, NFIL3, POU2F2, POU3F1, STAT1, STAT2, PAX8, FOXH1, KLF2, IRF9, NFAT5, HEY1, HEY2, ZNF219	FOXL1, FOS, FOXA1, HOXA5, STAT4, ARNT2, HEYL, CSRNP3, DMBX1
GO:0006357	regulation of transcription by RNA polymerase II	1.02455	10	0.0361016	9.51539e-06	3.83296e-05	AHR, ATF3, CEBPB, DDIT3, NOTCH1, STAT1, STAT2	FOS, ZBTB46
GO:0007051	spindle organization	5.58568	10	0.0709541	1.02694e-05	2.67611e-05		KIF11, AURKA, TTK, ASPM
GO:0045087	innate immune response	4.22601	10	0.202195	1.175e-05	0.000163801	IFI6, GBP1, IFI27, IFNB1, IRF7, KRT16, MX1, NCF2, PML, PTX3, TRIM21, TLR2, UBA7, TRIM25, APOL1, UBE2L6, ISG15, TRIM14, HERC5, IFIH1, NLRC5, RNASE7, TRIM5
GO:0005765	lysosomal membrane	1.78044	10	0.0143386	1.71661e-05	0.0278027	CLCN7, CTNS, DAB2, HLA-F, MITF, GPR143, IFITM1, SLC2A6, SLC39A14, OSTM1, SLC38A7, SLC29A3, PLA2G4E, WDR81, FLCN, RNF152	ANXA6
GO:0005876	spindle microtubule	2.53895	10	0.0785754	2.469e-05	0.00211093		CDK1, KIF11, AURKA, PSRC1
GO:0007052	mitotic spindle organization	3.17368	10	0.0322594	2.469e-05	0.00631966		CENPE, KIF11, TTK, NDC80, SPC25
GO:1902895	positive regulation of miRNA transcription	2.99233	10	0.074481	2.52564e-05	0.000187324	GATA3, MYC, TNF, KLF4	FOS, NGFR
GO:0051897	positive regulation of phosphatidylinositol 3-kinase/protein kinase B signal transduction	2.59799	10	0.0214297	2.65892e-05	0.0326703	CSF1R, AKR1C2, HBEGF, FGF2, FN1, GATA3, HCLS1, IGF1R, KIT, PLXNB1, RET, THBS1, TNF, TREM2, PIK3AP1	IGF2
GO:0043627	response to estrogen	3.98977	10	0.0196825	3.4866e-05	0.00278163	GATA3, TRIM25, CITED2, BCAS3
GO:0003713	transcription coactivator activity	1.69835	10	0.0330123	3.92246e-05	0.0011178	DTX1, LMO2, CIITA, NOTCH1, TRIM21, TRIM25, TRIM14, TRIM22, CITED2, NUPR1, ANKRD1, VGLL1, TRIM5	PER2, MYCBP
GO:0004842	ubiquitin-protein transferase activity	1.76514	10	0.0710564	4.4925e-05	0.000855142	TRIM21, TNFAIP3, UBA7, TRIM25, UBE2L6, FBXO2, TRIM17, HERC5, RNF213, TRIM5, TRIM69, DTX3L, RNF217, RNF152	UBE2C
GO:0016324	apical plasma membrane	2.21547	10	0.0285729	4.53586e-05	8.518e-05	CEACAM1, ABCC2, DPP4, IL6R, MPP3, NOTCH1, GPR143, PODXL, SLC6A9, SLC20A2, STX3, ABCB11, MGAM, ABCG2, SLC39A14, DLL1, CDHR2, ACE2, RAB17, ABCC11, SLC46A1	SLC39A4
GO:0046777	protein autophosphorylation	1.06249	10	0.0236119	4.84264e-05	0.0217733	CAMK2A, CSF1R, IGF1R, KIT, EIF2AK2, MAP4K1	AURKA
GO:0044389	ubiquitin-like protein ligase binding	7.39281	10	0.0500026	5.07622e-05	7.38959e-05	PTPRN, STAT1, STAT2, PARP9, DTX3L	UBE2C
GO:0010008	endosome membrane	1.42816	10	0.0125452	6.82312e-05	0.00107993	CLCN6, IRAK2, IRF7, MYD88, NOTCH1, RET, TFRC, ZDHHC11, MVB12B, WDR81	RHOBTB1, VPS37D
GO:0062023	collagen-containing extracellular matrix	2.53197	3	0.00719424	7.89463e-05	0.0450801	COL10A1, F3, FN1, PLSCR1, THBS1, COL14A1, CILP, EMILIN1, LAMA1	PLAT, MMRN2
GO:0051315	attachment of mitotic spindle microtubules to kinetochore	5.23657	10	0.0343497	8.14527e-05	0.000151151		CENPE, NDC80, KIF2C
GO:0051310	metaphase chromosome alignment	5.23657	10	0.0343497	8.14527e-05	0.0143425		CENPE, NDC80, KIF2C
GO:0000278	mitotic cell cycle	1.44457	10	0.0238566	0.000144035	0.00821256		CENPE, KIF11, AURKA, NDC80
GO:0007259	cell surface receptor signaling pathway via JAK-STAT	4.65473	10	0.00722031	0.000149055	0.00878432	CSF2, CSF2RB, IFNB1, STAT1, STAT2, NMI
GO:0000979	RNA polymerase II core promoter sequence-specific DNA binding	3.49105	10	0.0288812	0.000172946	0.0002546	STAT1	FOS
GO:0061629	RNA polymerase II-specific DNA-binding transcription factor binding	2.02706	10	0.0365919	0.00017483	0.00365492	AHR, DDIT3, GATA3, HCLS1, IFI27, LMO2, NHLH2, KLF4, HDAC9, HEY1, HEY2, ANKRD1, DACT1	FOS, HAND2
GO:0001221	transcription coregulator binding	2.79284	10	0.0231395	0.000177182	0.00294643	LMO2, MYC, PBX1	FOS
GO:0043154	negative regulation of cysteine-type endopeptidase activity involved in apoptotic process	3.6656	10	0.0135607	0.000191898	0.00677566	IFI6, THBS1, TNF, VEGFA, KLF4, LAMP3	ARL6IP1
GO:0032993	protein-DNA complex	1.74552	10	0.0191091	0.000210079	0.000557373	DDIT3, NUPR1	FOS
GO:0031625	ubiquitin protein ligase binding	1.26183	10	0.0697889	0.000226216	0.000350022	ACTG1, BAG1, DIO2, DTX1, PML, TNFRSF14, SQSTM1, SYT11, TRIB3	CD40, NGFR, PER1, PRKACB, TUBA1B, TXNIP
GO:0005080	protein kinase C binding	2.39386	10	0.0339018	0.000246055	0.00254998	SQSTM1, HDAC9, DACT1	TOP2A
GO:0032733	positive regulation of interleukin-10 production	4.18926	10	0.00722031	0.000263831	0.00782239	IL6, IRF4, LGALS9, ISG15, CLEC7A	PIBF1
GO:0001618	virus receptor activity	5.23657	10	0.0457117	0.000286182	0.000391878	DPP4, PLSCR1, SLC20A2, CLDN1, ACE2	HYAL1
GO:0004713	protein tyrosine kinase activity	1.99489	10	0.0309629	0.000293202	0.0261238	CSF1R, EPHA7, IGF1R, KIT, RET	JAK3
GO:0060339	negative regulation of type I interferon-mediated signaling pathway	7.3312	10	0.0250905	0.000295589	0.000496404	OAS1, OAS3, STAT2, ISG15, USP18, SAMHD1, NLRC5
GO:0000775	chromosome, centromeric region	3.37843	10	0.0372164	0.000302388	0.0134493		CENPE, INCENP, NDC80, KIF2C, HJURP
GO:0000977	RNA polymerase II transcription regulatory region sequence-specific DNA binding	1.87579	10	0.0140366	0.000315821	0.00737351	ATF3, CEBPB, IRF1, NFIL3, PBX1, STAT1, KLF15, ETV7, CREBRF	SALL2, BARX2, HAND2
GO:0070888	E-box binding	4.29668	10	0.0647129	0.000336104	0.00498403	AHR, GATA3, MITF, MYC, TFAP4, SCX	PER1, HAND2
GO:0043394	proteoglycan binding	6.44501	10	0.0135607	0.00034543	0.00034543	FN1, THBS1	COL2A1, CTSK
GO:0031012	extracellular matrix	3.28569	10	0.0256452	0.00034543	0.00034543	FN1, TGM2, THBS1, LAMA1, AMTN	GPLD1, MMP11, TFPI2
GO:0007059	chromosome segregation	3.22251	10	0.0365209	0.000351136	0.00318754		CENPE, INCENP, TOP2A, NDC80, HJURP, SPC25
GO:0006954	inflammatory response	4.22446	10	0.0721692	0.000372182	0.00430788	ADM, BMP2, CEBPB, CSF1R, GATA3, IL6, CXCL8, IRAK2, KIT, KRT16, LGALS9, PTX3, THBS1, TNF, HDAC9, TRIM14, BLNK, APOL3, NLRP3	CD40, FOS, HYAL1, AOC3, TXNIP
GO:0034976	response to endoplasmic reticulum stress	2.81368	10	0.0339018	0.00037261	0.000514642	ATF3, CEBPB, DDIT3, CXCL8, RASGRF1, THBS1, PPP1R15A, TRIB3	CREB3L2
GO:0001658	branching involved in ureteric bud morphogenesis	6.16068	10	0.0163967	0.000413343	0.0407538	BMP2, FGF2, HOXD11, MYC, PAX8
GO:0043235	receptor complex	2.1097	10	0.0232965	0.000419384	0.0101433	BMPR1B, CD36, CR2, IGF1R, ITGB3, NOTCH1, OLR1, PTPRB, RET, TLR2, VIPR1, P2RX6	RAMP2, SLITRK5
GO:0032922	circadian regulation of gene expression	2.528	10	0.0620719	0.000437703	0.00153173	AHR, PML	CRY2, NGFR, PER1, PER2, MAGED1
GO:0044754	autolysosome	8.37852	10	0.0462172	0.000452964	0.00305832	FTH1, FTL, SQSTM1, PLEKHM1
GO:0051865	protein autoubiquitination	2.09463	10	0.00701832	0.00049338	0.014754	TRIM21, TRIM17, KLHL24, RNF213, UBE3D, DTX3L
GO:0010506	regulation of autophagy	2.61829	10	0.0231395	0.000496407	0.0011327	DDIT3, IFI16, NUPR1, LAMP3, DRAM1, TRIB3
GO:0034451	centriolar satellite	1.38325	10	0.00678036	0.000578745	0.00737293	PODXL, TAP1, PDZD2	PIBF1, CYTH4, LRRC49, TBC1D31
GO:0001666	response to hypoxia	3.32481	10	0.0142864	0.000626969	0.0310755	BMP2, DPP4, PML, TH, VEGFA, CITED2, AJUBA	ADA, ANG, ARNT2
GO:0070059	intrinsic apoptotic signaling pathway in response to endoplasmic reticulum stress	4.18926	10	0.0142864	0.000652681	0.00109397	CEBPB, DDIT3, PPP1R15A, TRIB3, CHAC1
GO:0045824	negative regulation of innate immune response	4.36381	10	0.0508209	0.00067188	0.000976864	IFI16, TRIM21, TNFAIP3, NMI, DHX58
GO:0000281	mitotic cytokinesis	2.04354	10	0.0273117	0.000691125	0.00311057		INCENP, UNC119, KIF20A, ANLN
GO:0035456	response to interferon-beta	9.30947	10	0.0397787	0.000702592	0.00130741	PLSCR1, STAT1, IFITM1, XAF1
GO:0070936	protein K48-linked ubiquitination	2.39386	10	0.0382502	0.000713237	0.00176552	IFI27, TRIM21, TNFAIP3, TRIM25, DTX3L, RNF152	UBE2C, TRIM6
GO:0005874	microtubule	1.66618	10	0.0140366	0.000716153	0.00112832	SARM1, FSD1, AKNA	CENPE, KIF11, KIF14, TUBA1B
GO:0006513	protein monoubiquitination	2.61829	10	0.00678036	0.000743164	0.0293101	TRIM21, TRIM25, UBE3D, RNF152
GO:0070498	interleukin-1-mediated signaling pathway	1.99489	10	0.00678036	0.000754222	0.00103715	IRAK2, MYD88
GO:0031526	brush border membrane	4.07289	10	0.0135607	0.000794691	0.0013143	CD36, PDZK1, SLC20A2, ABCG2, CDHR2, ACE2, SLC28A3
GO:0008559	ABC-type xenobiotic transporter activity	10.4731	7	0.00684932	0.000794691	0.00401902	ABCA3, ABCC2, ABCB11, ABCG2, ABCC11
GO:0060337	type I interferon-mediated signaling pathway	8.97698	10	0.01674	0.000865251	0.0100831	IFI27, IFNB1, MYD88, OAS2, STAT1, STAT2
GO:0042742	defense response to bacterium	3.20355	10	0.0129038	0.000865251	0.0393926	ANXA3, CAMP, CEBPB, GBP1, MYD88, OAS1, OAS2, OAS3, ISG15, DEFB103B, ZNFX1, RNF213, IFNE
GO:0003725	double-stranded RNA binding	3.74041	10	0.0275875	0.000865251	0.00473906	OAS1, OAS2, OAS3, EIF2AK2, TFRC, OASL, IFIH1, DHX58, ZBP1	TUBA1B
GO:0004674	protein serine/threonine kinase activity	1.08921	10	0.0198894	0.000869965	0.0217733	BMPR1B, CAMK2A, EIF2AK2, NUAK1, MAP4K1, SIK3	BUB1, CDK1, PRKACB, MAPK4, AURKA, PBK, WNK4
GO:0034341	response to type II interferon	4.98721	10	0.0242924	0.000889582	0.0203061	CIITA, SP100, TRIM21, STAT1, IFITM1
GO:0070555	response to interleukin-1	2.61829	10	0.00678036	0.000890336	0.00110187	IRAK2, LGALS9, MYD88
GO:0043153	entrainment of circadian clock by photoperiod	3.14194	10	0.00678036	0.000909214	0.0398828	PML	CRY2, PER1
GO:0034142	toll-like receptor 4 signaling pathway	5.02711	10	0.00975816	0.000919006	0.00113728	IRAK2, LGALS9, MYD88, OAS1, NMI, PIK3AP1
GO:0070633	transepithelial transport	8.37852	1	0.0122699	0.00097411	0.00097411	ABCC2, SLC1A3, ABCG2	GPLD1
GO:0006355	regulation of DNA-templated transcription	1.50964	10	0.0311602	0.000990063	0.00732774	AHR, BMP2, CEBPB, DDIT3, HCLS1, HIC1, MITF, NOTCH1, PML, MAFB, TRIM22, ZNF219	TCF7, MAGED1, ARNT2, MYCBP
GO:0044790	suppression of viral release by host	4.83376	10	0.054751	0.00100185	0.00131272	PML, TRIM21, TRIM5
GO:0070530	K63-linked polyubiquitin modification-dependent protein binding	3.69641	10	0.0142864	0.00100289	0.00151559	SQSTM1, PARP10, WDR81
GO:0032481	positive regulation of type I interferon production	3.10316	10	0.00689688	0.00106957	0.00132342	IRF1, IRF7, MYD88, DHX58
GO:0030224	monocyte differentiation	6.28389	10	0.0280733	0.00112235	0.0276656	CSF1R, IFI16, VEGFA
GO:0031093	platelet alpha granule lumen	2.25575	10	0.0127394	0.00115951	0.00767296	ACTN2, FN1, THBS1, VEGFA	A1BG, AHSG, IGF2
GO:0031146	SCF-dependent proteasomal ubiquitin-dependent protein catabolic process	1.90421	5	0.0070922	0.00121247	0.00246956	FBXO2	KIF14
GO:0048147	negative regulation of fibroblast proliferation	3.49105	10	0.0103346	0.00122271	0.0158706	FTH1, MYC, PARP10
GO:0032729	positive regulation of type II interferon production	1.61125	10	0.00678036	0.00127406	0.0392288	LGALS9, ISG15, CLEC7A, IFNL1
GO:0006974	DNA damage response	0.943527	10	0.00706934	0.00129779	0.00194068	DDIT3, IRF7, MYC, NFAT5, PPP1R15A, SAMHD1, RBM24	CASP9, TOP2A, STXBP4
GO:0016525	negative regulation of angiogenesis	1.94849	10	0.0132049	0.00144889	0.00242363	CXCL10, PML, STAT1, THBS1, KLF4, EMILIN1, VASH1	HOXA5
GO:0006511	ubiquitin-dependent protein catabolic process	1.19207	10	0.0249282	0.00145899	0.00191044	TRIM25, SQSTM1, RNF213, WDR81, DTX3L, RNF217	UBE2C
GO:1905515	non-motile cilium assembly	3.49105	6	0.00667141	0.00149825	0.048246	DISC1	PIBF1, TMEM107
GO:0000086	G2/M transition of mitotic cell cycle	2.32737	10	0.0779681	0.0015394	0.00555916		CCNA2, CDK1, CDC25C, AURKA
GO:0051091	positive regulation of DNA-binding transcription factor activity	3.61143	10	0.0236901	0.0015739	0.00341398	ANXA3, BMP2, DDIT3, EDN1, IL6, KIT, NHLH2, TRIM21, TNF, TRIM25, TRIM14, TRIM22, CLEC7A, TRIM5	FOXA1
GO:0045429	positive regulation of nitric oxide biosynthetic process	6.44501	10	0.00709541	0.00157806	0.032108	ASS1, CD36, EDN1, PTGS2, TNF, KLF4, KLF2, CLEC7A
GO:0007623	circadian rhythm	3.10316	10	0.0264098	0.00174153	0.00451627	ASS1	CRY2, PER1, PER2
GO:1900182	positive regulation of protein localization to nucleus	3.92743	10	0.0365209	0.00180551	0.0148976	EDN1, TFRC, PARP9, DTX3L	CDK1, NGFR
GO:0031397	negative regulation of protein ubiquitination	1.90421	10	0.0418245	0.00184184	0.00300517	TNFAIP3, SQSTM1, ISG15	PER2
GO:0032753	positive regulation of interleukin-4 production	6.54572	10	0.0132049	0.00196977	0.0358031	CEBPB, GATA3, IRF4, LGALS9, NLRP3
GO:0018105	peptidyl-serine phosphorylation	1.06057	10	0.0234496	0.00199805	0.0179529	CAMK2A, MAP4K1	CDK1, AURKA
GO:0001968	fibronectin binding	4.18926	9	0.00684932	0.00212159	0.00837144	ITGB3, THBS1, VEGFA	CTSK
GO:0070371	ERK1 and ERK2 cascade	3.98977	10	0.0809943	0.00212159	0.00537733	LGALS9, MYC, PTGER4	CDK1
GO:0004252	serine-type endopeptidase activity	3.92743	1	0.0070922	0.00212159	0.00212159	CFB, C1S, DPP4, F3, FAP, MMP2, MMP3, MMP12, PLAU, PROC, TLL2, KLK14	CTSK, MMP11, PLAT
GO:0043410	positive regulation of MAPK cascade	2.61829	8	0.00689688	0.00222544	0.0242562	ADRA1B, BMP2, FGF2, IL6, KIT, EIF2AK2, RET, TNF, VEGFA, MAP4K1, TRIM5	IGF2, DUSP19
GO:2001244	positive regulation of intrinsic apoptotic signaling pathway	2.73213	10	0.0140366	0.00223124	0.00338518	DDIT3, NUPR1, BBC3
GO:0071456	cellular response to hypoxia	1.39642	10	0.0280871	0.00234733	0.00365492	MYC, NOTCH1, PTGS2, VEGFA, CITED2
GO:0061630	ubiquitin protein ligase activity	1.63055	10	0.0230613	0.0026362	0.00426293	TRIM21, TRIM25, TRIM22, HERC5, ASB2, RNF213, TRIM63, UBE3D, TRIM69, RNF152	UBE2C, NEURL1B, TRIM6
GO:0000307	cyclin-dependent protein kinase holoenzyme complex	2.20487	10	0.0135607	0.00265006	0.00529893		CCNA2, CDK1
GO:0001223	transcription coactivator binding	1.8482	10	0.0214297	0.00269057	0.0054641	AHR, STAT1	HAND2
GO:0032728	positive regulation of interferon-beta production	5.89115	10	0.00701832	0.00272415	0.0472852	IRF1, IRF7, OAS1, OAS2, OAS3, TLR2, ISG15, IFIH1	ARRDC4
GO:0045184	establishment of protein localization	2.61829	7	0.00649351	0.00275804	0.00313195	DLG4, PHLDB2	KIF14
GO:0002062	chondrocyte differentiation	6.37496	4	0.00667735	0.00282721	0.0473106	BMP2, SLC39A14, OSR1, SCX	GPLD1, WNT2B, CREB3L2
GO:0010629	negative regulation of gene expression	2.51356	10	0.0191091	0.00282721	0.0414087	BMP2, ABCC2, CXCL8, ITGB8, LGALS9, NOTCH1, TNF, VEGFA, CILP, STC2, KLF4, CITED2, EMILIN1, HEY2, DLL4, PARP14, SLC24A3, PARP9, PARP10, UPK3B	AURKA, HAND2, SLC2A10, TRIM6
GO:0043065	positive regulation of apoptotic process	2.06513	10	0.0129038	0.00282721	0.0198816	BMP2, IFIT2, IL6, TFAP4, TGM2, TNF, TNFSF10, SQSTM1, HIP1R, EMILIN1, ANKRD1, CALHM2, ZBP1, FLCN	CASP9, GPLD1, FOXA1, HOXA5, TOP2A, MLLT11, CSRNP3
GO:0045787	positive regulation of cell cycle	3.22251	10	0.021055	0.00283494	0.00395808	TRIM21, TGM1, CITED2, NUPR1
GO:0042826	histone deacetylase binding	1.53266	7	0.00724638	0.00286922	0.0434086	HIC1, TFAP4, HDAC9, HEY2, ANKRD1, DACT1
GO:0000226	microtubule cytoskeleton organization	2.01407	10	0.0204838	0.0029093	0.0261525	DISC1, PHLDB2	CDK1, TUBA1B, DOCK7
GO:0035591	signaling adaptor activity	3.49105	2	0.0093966	0.00295809	0.00866576	HCLS1, IRAK2, MYD88, BLNK, ZDHHC11, NLRP3
GO:0007019	microtubule depolymerization	6.28389	10	0.0491525	0.00298452	0.00545327		KIF14, KIF2C, KIF18A
GO:0030136	clathrin-coated vesicle	2.20487	3	0.00641026	0.00323032	0.00364744	DAB2, HIP1R, DNAJC6	FCHO1
GO:0002020	protease binding	2.64838	10	0.00678036	0.00340161	0.0412115	CD70, DPP4, F3, FAP, FN1, ITGB3, THBS1, TNF, TNFAIP3, CD177	INSL3
GO:0032088	negative regulation of NF-kappaB transcription factor activity	2.03645	10	0.0140436	0.00348113	0.0155517	IRAK2, TRIM21, TNFAIP3, KLF4, NLRC5, PARP10, NLRP3
GO:0045171	intercellular bridge	1.74552	10	0.0132049	0.00351489	0.0300569	NUPR1, KCNV1	CENPE, GSTM4, UNC119, KIF20A, CYTH4
GO:0030225	macrophage differentiation	6.28389	10	0.00689688	0.00375424	0.0491507	CSF1, CSF1R, CSF2, GATA3, VEGFA, SOCS1
GO:0002931	response to ischemia	3.80842	4	0.00660246	0.00376081	0.0497475	CAMK2A, CSF1, CSF1R	PER2
GO:0034097	response to cytokine	3.14194	10	0.021208	0.00380029	0.00689191	IL6R, PML, STAT1
GO:0032880	regulation of protein localization	2.09463	10	0.00701832	0.00403302	0.034221	ITGB3, TRIM25, TRIM22, TRIM17, TRIM5
GO:0043130	ubiquitin binding	2.01407	8	0.0100906	0.0041485	0.0275118	TNFAIP3, SQSTM1, UBE2L6, MVB12B	TOP2A
GO:0042531	positive regulation of tyrosine phosphorylation of STAT protein	4.92854	3	0.00649351	0.00415826	0.0219638	CSF1R, CSF2, HCLS1, IL6, IL6R, KIT, TNF, PARP14, PARP9, IFNL1	CD40, PIBF1
GO:2001238	positive regulation of extrinsic apoptotic signaling pathway	1.82142	10	0.00678036	0.00419218	0.00628827	PML, TNFSF10
GO:0005201	extracellular matrix structural constituent	2.53895	10	0.00678036	0.00449054	0.00449054	FN1, THBS1, LAMA1	TFPI2
GO:0004857	enzyme inhibitor activity	4.48849	10	0.0160518	0.00453953	0.0177135	NOTCH1, SCG5, BSN, PARP9, DTX3L, FLCN
GO:0050679	positive regulation of epithelial cell proliferation	2.83058	4	0.00667735	0.00476395	0.0091913	MYC, VEGFA, NR4A3, OSR1	HYAL1
GO:0001932	regulation of protein phosphorylation	2.51356	10	0.01674	0.00497761	0.00910247	FN1, STAT2, SOCS1
GO:0002218	activation of innate immune response	3.22251	10	0.0135234	0.00497761	0.00910247	IFI16, ZNFX1, ZBP1, TRIM5
GO:0031616	spindle pole centrosome	5.23657	10	0.0206906	0.00638464	0.00821256		AURKA, DLGAP5
GO:0007265	Ras protein signal transduction	2.32737	10	0.00678036	0.00643232	0.0122724	FGF2, RRAS2, LAT	CCNA2
GO:0003950	NAD+ ADP-ribosyltransferase activity	3.14194	10	0.00689688	0.00644173	0.0446215	PARP14, PARP9, PARP10
GO:0120162	positive regulation of cold-induced thermogenesis	2.13738	6	0.0137938	0.00659061	0.0437302	CD36, CEBPB, DIO2, GRB10, IGF1R, IRF4, VEGFA, TRPV2	PER2, ELOVL3
GO:0002230	positive regulation of defense response to virus by host	5.46425	10	0.0193556	0.00664834	0.0113854	STAT1, TRIM22, ZDHHC11, PARP9, DTX3L	TRIM6
GO:0000987	cis-regulatory region sequence-specific DNA binding	2.61829	8	0.00973209	0.00678875	0.00920632	AHR, GATA3, NOTCH1, HEY1, HEY2
GO:0090303	positive regulation of wound healing	5.63939	2	0.00682832	0.00707601	0.0243584	ACTG1, HBEGF, MYLK, CLDN1, DUOX1, CLEC7A	INSL3
GO:0043392	negative regulation of DNA binding	3.69641	10	0.0135607	0.00757265	0.0158706	IFI16, SP100, TFAP4
GO:0042771	intrinsic apoptotic signaling pathway in response to DNA damage by p53 class mediator	2.32737	10	0.021055	0.00757265	0.0158706	IFI16, PML
GO:0035458	cellular response to interferon-beta	9.164	10	0.0285729	0.00760148	0.0131209	CAMK2A, IFNB1, IRF1, OAS1, STAT1, PNPT1	TRIM6
GO:1990841	promoter-specific chromatin binding	1.65365	4	0.00702178	0.00777162	0.00991395	PRDM1, STAT1, KLF4
GO:0016301	kinase activity	1.86189	10	0.0250905	0.0078353	0.0131209	CAMK2A, EIF2AK2, TRIB3	CDK1
GO:0046718	symbiont entry into host cell	2.32737	3	0.00671141	0.00792468	0.00792468	ITGB3, LAMP3, ACE2
GO:0032418	lysosome localization	1.55158	1	0.00613497	0.00794054	0.00794054	PLEKHM1, FLCN
GO:0034394	protein localization to cell surface	3.49105	2	0.00636969	0.00814833	0.00822418	ANK2, PTPRK, CD177	WNT11
GO:0030054	cell junction	1.66461	4	0.00636969	0.00822418	0.0439862	CEACAM1, DLG4, NEU1, PTPRK, P2RX6, MAGI1, GJB6, TBC1D2, SLC2A11, PARD3B, PLEKHA7	CLDN11
GO:0071346	cellular response to type II interferon	4.582	10	0.0137938	0.00840481	0.0380753	CAMK2A, GBP1, LGALS9, STAT1, TLR2, GBP4, GBP5
GO:0051973	positive regulation of telomerase activity	1.90421	9	0.00694444	0.00845166	0.0294643	MYC, KLF4, GREM1
GO:0030155	regulation of cell adhesion	3.92743	9	0.00694444	0.00845166	0.0345792	CXCL8, PLAU, RET, NUAK1, DLL1	KIF14
GO:0008544	epidermis development	2.16686	9	0.0134228	0.00852339	0.0393458	KRT9, KRT34, SPRR1A, TGM5, EDAR, CALML5
GO:0016323	basolateral plasma membrane	1.47698	10	0.0133428	0.00878031	0.0409378	ANK2, SLC6A9, SLC6A12, TFRC, ABCB11, CLDN1, SLC39A14, RAB17, SLC46A1, SLC16A12	AURKA
GO:0030335	positive regulation of cell migration	2.36681	10	0.0352392	0.00894154	0.0207537	ACTG1, BMP2, CSF1, DAB2, HBEGF, EDN1, F3, IGF1R, MYLK, NOTCH1, PLAU, PODXL, RET, THBS1, VEGFA, CLDN1, GPNMB, CEMIP, CLEC7A	TMSB15B
GO:0010494	cytoplasmic stress granule	1.56316	10	0.0285729	0.00894355	0.0165771	TRIM21, TRIM25, LARP1, ZNFX1	RBPMS2
GO:0031902	late endosome membrane	1.61125	10	0.00678036	0.00955025	0.0166988	SLC39A14, SLC29A3, WDR81	ANXA6
GO:0042393	histone binding	1.46624	10	0.00689688	0.0097126	0.0347427	STAT1, BCAS3, PARP9, DTX3L	CD1D, NPM2, HJURP
GO:0032735	positive regulation of interleukin-12 production	2.09463	9	0.00684932	0.00982144	0.0139369	LGALS9, TLR2, CLEC7A
GO:0001934	positive regulation of protein phosphorylation	1.6757	2	0.00679285	0.00999445	0.0497475	BMP2, CSF1R, DAB2, ITGB3, TFRC, TNF, VEGFA, GPNMB, TREM2	CD40
GO:0006953	acute-phase response	8.72762	10	0.0203411	0.0104283	0.0236454	CEBPB, IL6, IL6R, PLSCR1	AHSG
GO:0045121	membrane raft	1.43906	10	0.00678036	0.0104283	0.0367821	ABCA1, CD36, PLSCR1, TLR2, TNF, ABCG2, LAT, DLL1, ACE2
GO:0046328	regulation of JNK cascade	2.99233	10	0.00678036	0.0104283	0.0131209	IGF1R, MAPK8IP2
GO:0005178	integrin binding	2.69606	7	0.00724638	0.0107524	0.0398434	ACTN2, ECM2, FAP, FGF2, FN1, NRG1, ITGB3, THBS1, ISG15, CD177, FRMD5	IGF2, ADAM23
GO:0051928	positive regulation of calcium ion transport	3.30731	10	0.00678036	0.0109637	0.0183733	ANK2, CAMK2A, MYLK
GO:0140677	molecular function activator activity	2.73213	10	0.00678036	0.0110972	0.0203577	CITED2	INCENP, AURKA
GO:0005912	adherens junction	3.32481	10	0.00714322	0.0111932	0.0326081	CEACAM1, MPP3, NOTCH1, VEGFA, MAGI1, CYTH3, DLL1, KLHL24, FRMD5	SPTBN4
GO:0030218	erythrocyte differentiation	1.44457	1	0.00632911	0.0113877	0.0113877	HCLS1, KIT
GO:0060354	negative regulation of cell adhesion molecule production	4.65473	10	0.00678036	0.0118602	0.0159385	CXCL8, NOTCH1
GO:0030216	keratinocyte differentiation	2.53895	10	0.0271214	0.011911	0.0162944	KRT16, SPRR1A, TGM1	TXNIP
GO:0016605	PML body	1.43468	10	0.01674	0.0121669	0.0268779	CIITA, PML, SP100, SQSTM1	SPTBN4
GO:0005198	structural molecule activity	3.25831	9	0.00684932	0.0127037	0.0274235	CRYAB, SPRR1A, SPRR2E, KRT75, MAPK8IP2	SPAG4, TUBA1B
GO:0001533	cornified envelope	2.49361	4	0.00960719	0.0127037	0.0204478	DSG1, SPRR1A, SPRR2A, SPRR2E, TGM1
GO:0035631	CD40 receptor complex	1.90421	10	0.0135607	0.0127529	0.0152911		CD40
GO:0004888	transmembrane signaling receptor activity	2.61829	10	0.00716929	0.0127529	0.0155517	BMPR1B, NOTCH1, P2RX6, NRXN2, EDAR, TREM2, DNER	NGFR, IL27RA
GO:0140052	cellular response to oxidised low-density lipoprotein particle stimulus	6.9821	10	0.00689688	0.0127529	0.0155517	CD36, MYD88, TREM2	TXNIP
GO:0051010	microtubule plus-end binding	3.49105	10	0.00689688	0.0131512	0.0156733		KIF2C, KIF18A
GO:0000922	spindle pole	0.872762	6	0.00645188	0.0132695	0.0180828		KIF11, UNC119, PSRC1
GO:0051233	spindle midzone	3.49105	10	0.0189427	0.013481	0.0269096		CENPE, UNC119, KIF14
GO:0140693	molecular condensate scaffold activity	1.61125	2	0.00660246	0.0135325	0.0135325	SQSTM1, BLNK, NLRP3
GO:0000932	P-body	1.10244	2	0.00957587	0.0142504	0.0272884	SQSTM1, AJUBA, TRIM5
GO:0035556	intracellular signal transduction	1.69835	1	0.00613497	0.0144581	0.0144581	ADRA1B, CXCL1, HCLS1, CXCL8, TFRC, NR4A3, SQSTM1, LAT, BLNK, FLCN	JAK3, WNK4
GO:0140297	DNA-binding transcription factor binding	0.937894	1	0.00684932	0.0144852	0.0144852	CIITA, MYC, FOXH1, HDAC9, PARP10, NLRP3
GO:0006879	intracellular iron ion homeostasis	1.82142	2	0.0159872	0.0148581	0.0159639	FTH1, FTL, MYC, SLC46A1
GO:0043161	proteasome-mediated ubiquitin-dependent protein catabolic process	0.935103	9	0.012987	0.0155151	0.0476144	DDIT3, IFI27, PML, ASB2	KIF14
GO:0071466	cellular response to xenobiotic stimulus	2.32737	10	0.00678036	0.0156621	0.0249154	MYC, TFRC	GPLD1
GO:0002357	defense response to tumor cell	1.61125	10	0.00678036	0.0157453	0.0202797	KLF4
GO:0098586	cellular response to virus	5.66116	2	0.00682832	0.0158586	0.0184819	IFI6, IFNB1, IL6, CXCL10, LGALS9, OAS1, POU2F2, IFIH1, NLRP3, VWCE
GO:0043280	positive regulation of cysteine-type endopeptidase activity involved in apoptotic process	2.55443	2	0.00631424	0.0159194	0.0159194	MYC, TNF, TNFSF10, CLEC7A, NLRP3
GO:0001823	mesonephros development	6.28389	5	0.0070922	0.016375	0.0172434	GATA3, PAX8, OSR1
GO:0004672	protein kinase activity	0.821423	2	0.00973209	0.0164538	0.0197978	EIF2AK2, HSPB8	BUB1, CDK1, AURKA, SGK3
GO:0002755	MyD88-dependent toll-like receptor signaling pathway	1.49616	10	0.00678036	0.0167206	0.0192284	IRAK2
GO:0003777	microtubule motor activity	2.99233	10	0.0124641	0.0167206	0.0195161		CENPE, KIF11
GO:0007229	integrin-mediated signaling pathway	2.28505	10	0.0161469	0.0174301	0.0463055	DAB2, FN1, ITGB3, ITGB8, ISG15, LAT
GO:0010595	positive regulation of endothelial cell migration	3.67479	1	0.0070922	0.0174301	0.0174301	ANXA3, EDN1, FGF2, GATA3, ITGB3, THBS1, VEGFA, BCAS3	GPLD1, RRAS
GO:0042127	regulation of cell population proliferation	2.18842	2	0.00679285	0.0177638	0.0205686	CXCL10, KIT, CXCL11, TFRC, NUAK1, ACE2	SGK3
GO:0060076	excitatory synapse	4.48849	1	0.00684932	0.0182382	0.0182382	DLG4, BSN, SYT11
GO:0035371	microtubule plus-end	1.30914	6	0.00645188	0.018493	0.0227212		KIF2C
GO:0060236	regulation of mitotic spindle organization	2.61829	6	0.00645188	0.018493	0.0227212	FSD1	PSRC1
GO:0071222	cellular response to lipopolysaccharide	1.97142	10	0.00678036	0.0187758	0.0231433	IL6, CXCL8, CXCL10, MMP3, MYD88, TNFAIP3, ANKRD1, NLRP3
GO:0015629	actin cytoskeleton	1.65677	8	0.00660246	0.0188189	0.0250918	GBP1, MYLK, PAWR, WASF1, HAP1, IFIT5, USH1G, SYNPO2	ANG, SMTN, BARX2, FSCN3, ANLN, NEURL1B
GO:0000082	G1/S transition of mitotic cell cycle	1.53266	8	0.00678036	0.0190524	0.030521	CAMK2A, MYC	CDKN3
GO:0007219	Notch signaling pathway	6.10934	4	0.00667141	0.0190556	0.0262291	BMP2, NOTCH1, HEY1, HEY2, DLL1, DLL4	HEYL
GO:0005667	transcription regulator complex	2.06877	10	0.00678036	0.019191	0.0302114	AHR, HCLS1, LMO2, NHLH2, FOXH1, HDAC9, SCX	HAND2
GO:0007166	cell surface receptor signaling pathway	2.38413	2	0.00641131	0.0195048	0.0278027	BAG1, DTX1, EDN1, IFNB1, CXCL10, MYD88, IFITM1, TNFRSF14, MAGI1, CD101, IRF9, MERTK, LAMA1	IL27RA
GO:0006915	apoptotic process	1.73441	10	0.00701832	0.0195684	0.0311355	AHR, IFI6, IFI27, IRF1, MX1, MYD88, PAWR, PLSCR1, TLR2, PPP1R15A, BBC3, RNF152	CASP9
GO:1901224	positive regulation of non-canonical NF-kappaB signal transduction	3.11966	10	0.00706934	0.0197476	0.0284243	IFI35, LGALS9, EIF2AK2, TLR2, TNF, NMI, NLRP3
GO:0032092	positive regulation of protein binding	2.99233	8	0.0069018	0.0197938	0.0492544	BMP2, TRIM21, HIP1R, DACT1, TRIB3, DTX3L
GO:0001558	regulation of cell growth	2.46427	3	0.00684932	0.0197978	0.0207614	CEACAM1, TFRC	KIF14, SGK3
GO:0032091	negative regulation of protein binding	2.51356	8	0.00975816	0.0207503	0.0499544	DAB2, IFIT2, IFIT1, DISC1, DACT1	AURKA
GO:0005161	platelet-derived growth factor receptor binding	3.80842	1	0.0070922	0.0207643	0.0207643	ITGB3, VEGFA
GO:0035723	interleukin-15-mediated signaling pathway	2.09463	10	0.00678036	0.0207643	0.0288161		JAK3
GO:0001541	ovarian follicle development	5.71263	10	0.00689688	0.0207643	0.0288161	CEBPB, KIT, VEGFA
GO:0030276	clathrin binding	3.69641	2	0.00697889	0.0211979	0.0370271	HIP1R, DNAJC6, DNER
GO:0008283	cell population proliferation	2.25575	10	0.00722031	0.0212015	0.0309886	CSF1R, EDNRA, CITED2, MAP4K1, LARP1	CDC25C, FAM83A
GO:0031929	TOR signaling	4.83376	9	0.0122699	0.021203	0.0484555	GATA3, LARP1, FLCN
GO:0090051	negative regulation of cell migration involved in sprouting angiogenesis	3.87894	10	0.00689688	0.021237	0.0341577	NOTCH1, THBS1, KLF4, DLL4	MMRN2
GO:0051457	maintenance of protein location in nucleus	1.61125	5	0.0070922	0.0212501	0.0371795	PML
GO:0035987	endodermal cell differentiation	2.32737	4	0.00675123	0.0212908	0.0277958	COL8A1, FN1, MMP2
GO:0005911	cell-cell junction	2.13342	5	0.00671141	0.0216777	0.0480574	ACTG1, CEACAM1, DSG1, ITGB3, PTPRK, STX3, MAGI1, PDZD2, HEG1, AJUBA, AMTN
GO:0010508	positive regulation of autophagy	2.02706	2	0.00623204	0.0223347	0.0381749	IFNB1, TRIM21, SQSTM1, TRIM22, FLCN, RNF152
GO:0046426	negative regulation of receptor signaling pathway via JAK-STAT	1.74552	7	0.00684932	0.0225118	0.0310755	SOCS1
GO:1990404	NAD+-protein ADP-ribosyltransferase activity	2.99233	9	0.00684932	0.0226634	0.0498526	PARP14, PARP12, PARP10
GO:0009410	response to xenobiotic stimulus	2.22833	10	0.00722031	0.0227395	0.0316972	ABCA3, AHR, CD38, MYC, THBS1
GO:0043277	apoptotic cell clearance	5.23657	1	0.0070922	0.0228226	0.0228226	ITGB3, TGM2, TREM2
GO:0010759	positive regulation of macrophage chemotaxis	4.48849	4	0.00682793	0.0228648	0.0442641	CSF1, CSF1R, THBS1
GO:0070534	protein K63-linked ubiquitination	2.56485	10	0.0132049	0.0232146	0.025711	TRIM21, TRIM22, RNF213, TRIM5, RNF152	ARRDC4
GO:0070102	interleukin-6-mediated signaling pathway	3.22251	10	0.00678036	0.023611	0.0314906	IL6, IL6R
GO:0034446	substrate adhesion-dependent cell spreading	2.02706	10	0.00722031	0.0243181	0.0427304	FN1, ITGB3	KIF14
GO:0036064	ciliary basal body	0.997443	10	0.00678036	0.0249383	0.0330588		AURKA, EFHC2, TBC1D31, IQCD, LCA5
GO:0032731	positive regulation of interleukin-1 beta production	3.49105	10	0.00701832	0.025031	0.0414375	CD36, IFI16, IL6, LGALS9, MYD88, TNF, CLEC7A, NLRP3, GBP5
GO:0055013	cardiac muscle cell development	4.18926	10	0.00678036	0.0261079	0.0429631	VEGFA, ASB2
GO:0033558	protein lysine deacetylase activity	1.74552	7	0.00684932	0.0262755	0.0291363	HDAC9
GO:0043922	negative regulation by host of viral transcription	1.74552	7	0.00684932	0.0262755	0.0291363	TFAP4
GO:0001046	core promoter sequence-specific DNA binding	3.22251	7	0.00684932	0.0265885	0.0294817	MMP12, MYC
GO:0051085	chaperone cofactor-dependent protein refolding	4.65473	10	0.00714322	0.0266391	0.0434802	BAG1	SDF2L1
GO:0005158	insulin receptor binding	5.23657	10	0.0132049	0.0268577	0.044296	GRB10, IGF1R	IGF2, INSL3
GO:0031334	positive regulation of protein-containing complex assembly	3.40986	1	0.00649351	0.0268648	0.0268648	NRG1, MMP3, TFRC, TNF, VEGFA, CLEC7A, AJUBA
GO:0017148	negative regulation of translation	1.44457	9	0.00671141	0.0273705	0.0304116	EIF2AK2, CPEB3, LARP1, PATL2
GO:0035035	histone acetyltransferase binding	3.92743	10	0.00701832	0.0274407	0.0380084	STAT1, CITED2, BCAS3
GO:0071276	cellular response to cadmium ion	1.04731	10	0.00678036	0.0276242	0.0322861		FOS
GO:0000228	nuclear chromosome	1.04731	10	0.00678036	0.0276242	0.0322861		TOP2A
GO:0070412	R-SMAD binding	2.99233	10	0.00689688	0.0278582	0.0325576	FOXH1, ANKRD1	FOS
GO:0060395	SMAD protein signal transduction	2.99233	10	0.00678036	0.0278582	0.0325576	MAGI2	FOS, GDF5
GO:0030949	positive regulation of vascular endothelial growth factor receptor signaling pathway	4.65473	8	0.0127394	0.0278886	0.0374055	GRB10, ITGB3
GO:0043232	intracellular non-membrane-bounded organelle	1.49616	8	0.00667141	0.0278973	0.0434244	SQSTM1
GO:0001222	transcription corepressor binding	1.04731	2	0.00678775	0.0279369	0.0396734	PBX1, STAT1
GO:0051117	ATPase binding	1.54017	6	0.00667141	0.0281657	0.0347811	ABCA1, ANK1, ANK2, BBC3	SNTA1
GO:0010564	regulation of cell cycle process	3.49105	9	0.0134228	0.028316	0.0451159	MYC, ANKK1
GO:0051787	misfolded protein binding	1.74552	10	0.00678036	0.028316	0.0434802		SDF2L1
GO:0031175	neuron projection development	2.29548	3	0.00719424	0.0283483	0.034803	IL6, OPHN1, RASGRF1, STX3, MICALL1	NRTN, STMN3, DOCK7
GO:0048013	ephrin receptor signaling pathway	1.69835	4	0.00667141	0.0286988	0.0335355	EPHA7, MMP2, ARHGEF28
GO:0034356	NAD biosynthesis via nicotinamide riboside salvage pathway	4.65473	1	0.0126582	0.0287555	0.0287555	PARP9, PARP10
GO:0048009	insulin-like growth factor receptor signaling pathway	2.09463	9	0.00671141	0.0290284	0.0374055	IGF1R
GO:0006914	autophagy	1.87021	3	0.00684932	0.0300464	0.0309586	SQSTM1, WDR45, SYT11, TRIM17, TRIM5
GO:0006096	glycolytic process	3.22251	4	0.00645188	0.0302114	0.0431591	HK2, PFKFB2
GO:0031994	insulin-like growth factor I binding	3.80842	8	0.0129038	0.0303874	0.0380679	IGF1R, ITGB3
GO:0072583	clathrin-dependent endocytosis	4.18926	3	0.00641026	0.030532	0.0330588	DNAJC6, MAGI2, DLL1	FCHO1
GO:0035871	protein K11-linked deubiquitination	4.18926	6	0.00704785	0.0309586	0.0431791	TNFAIP3	OTUD3
GO:0032760	positive regulation of tumor necrosis factor production	2.32737	9	0.00671141	0.0309861	0.0493175	IL6, LGALS9, OAS1, OAS2, OAS3, THBS1, TLR2, IFIH1, CLEC7A
GO:0031116	positive regulation of microtubule polymerization	0.952104	10	0.0124641	0.0316391	0.0363672		PSRC1
GO:0032727	positive regulation of interferon-alpha production	3.30731	10	0.0132596	0.0318801	0.0462363	IRF7, STAT1, IFIH1
GO:0045765	regulation of angiogenesis	2.20487	2	0.00631424	0.0318801	0.0347354	FGF2, SP100
GO:0045737	positive regulation of cyclin-dependent protein serine/threonine kinase activity	1.74552	9	0.00671141	0.0318823	0.0456452		PSRC1
GO:0050728	negative regulation of inflammatory response	2.04354	8	0.00678036	0.0320229	0.0395864	AHR, GATA3, PROC, PTGER4, TNFAIP3, KLF4, NLRP3	FNDC4
GO:0045820	negative regulation of glycolytic process	5.71263	2	0.00669067	0.032893	0.0475199	NUPR1, TRIM63, FLCN
GO:1903672	positive regulation of sprouting angiogenesis	4.18926	8	0.00689688	0.0329503	0.0491507	FGF2, VEGFA, KLF4, DLL1
GO:0045295	gamma-catenin binding	4.18926	1	0.00613497	0.0329511	0.0329511	DSG1, PTPRK
GO:0002042	cell migration involved in sprouting angiogenesis	5.23657	1	0.0070922	0.033398	0.033398	FGF2, VEGFA, GREM1	GPLD1
GO:0001578	microtubule bundle formation	1.82142	6	0.00645188	0.0334318	0.0410502		KIF20A, PSRC1
GO:0051983	regulation of chromosome segregation	5.23657	10	0.00678036	0.0337678	0.036571		BUB1, KIF2C
GO:0000940	outer kinetochore	3.80842	10	0.00678036	0.0337678	0.036571		BUB1, NDC80
GO:0032736	positive regulation of interleukin-13 production	6.28389	10	0.00689688	0.0347141	0.0485998	GATA3, IRF4, LGALS9
GO:0044027	negative regulation of gene expression via chromosomal CpG island methylation	1.90421	1	0.00649351	0.0348096	0.0348096	MYC
GO:0043325	phosphatidylinositol-3,4-bisphosphate binding	4.18926	2	0.00631424	0.0349116	0.0494133	HIP1R, PLEKHA4, MYO1G, PLA2G4E	ADAP2
GO:0004712	protein serine/threonine/tyrosine kinase activity	1.49616	9	0.00671141	0.0351133	0.0471262		AURKA
GO:1900246	positive regulation of RIG-I signaling pathway	4.18926	3	0.00632911	0.0351151	0.0398204	OASL, DHX58
GO:0050821	protein stabilization	1.02804	5	0.0070922	0.0355921	0.0417573	ANK2, CRYAB, DSG1, HIP1R, WDR81	PER3, OTUD3, STXBP4
GO:0042981	regulation of apoptotic process	1.53266	6	0.00701832	0.0356842	0.0462363	CXCL10, STAT1, TGM2, PAX8, TNFSF9	MAGED1
GO:0035455	response to interferon-alpha	8.37852	10	0.0144406	0.035995	0.049151	MX2, EIF2AK2, IFITM1, LAMP3
GO:0010887	negative regulation of cholesterol storage	6.9821	10	0.00678036	0.0371429	0.0481138	ABCA1, ABCG1, TREM2
GO:0010745	negative regulation of macrophage derived foam cell differentiation	6.28389	10	0.00678036	0.0371429	0.0481138	ABCA1, ITGB3, ABCG1
GO:0032367	intracellular cholesterol transport	4.18926	10	0.00678036	0.0371429	0.0481138	ABCA1, ABCG1
GO:0033700	phospholipid efflux	3.80842	10	0.00678036	0.0371429	0.0481138	ABCA1, ABCG1
GO:0043691	reverse cholesterol transport	3.49105	10	0.00678036	0.0371429	0.0481138	ABCA1, ABCG1
GO:0005768	endosome	1.63826	10	0.00678036	0.0371429	0.0481138	ABCA1, CTSE, PTPRN, SLC6A9, TFRC, ABCB11, ABCG1, UNC93B1, SLC46A1, TMEM184A	JAK3, NGFR, PRSS16, ARRDC4
GO:1990877	FNIP-folliculin RagC/D GAP	2.09463	1	0.00613497	0.0372028	0.0372028	FLCN
GO:0019221	cytokine-mediated signaling pathway	2.99233	1	0.0126582	0.0372289	0.0372289	CSF1R, IFNB1, IL6, IL6R, KIT, SOCS1, DUOX1
GO:0019985	translesion synthesis	2.09463	2	0.00689688	0.0374551	0.0374551	PARP10
GO:1903078	positive regulation of protein localization to plasma membrane	1.82142	1	0.00684932	0.0376888	0.0376888	STX3, TNF, SQSTM1, TREM2
GO:0033138	positive regulation of peptidyl-serine phosphorylation	2.22833	2	0.00649214	0.0376888	0.0421939	IL6, TFRC, TNF	DOCK7, TRIM6
GO:0042130	negative regulation of T cell proliferation	3.30731	1	0.00649351	0.0377137	0.0377137	CEBPB, GPNMB, VTCN1
GO:0000132	establishment of mitotic spindle orientation	0.837852	6	0.00645188	0.0382624	0.0469733		NDC80
GO:0055091	phospholipid homeostasis	6.44501	10	0.00678036	0.0385736	0.0495726	ABCA1, ABCB11, ABCG1	RCN3
GO:0016234	inclusion body	2.99233	8	0.00689688	0.0385736	0.047555	SQSTM1, HAP1
GO:0050868	negative regulation of T cell activation	4.83376	2	0.00722031	0.0392269	0.0470585	GPNMB, VTCN1	JAK3
GO:1990907	beta-catenin-TCF complex	2.09463	4	0.00636969	0.0394768	0.0414759		BCL9
GO:0007155	cell adhesion	2.23427	3	0.00632911	0.0396129	0.0439862	ACTN2, APBA1, RND3, CEACAM1, CDH4, ITGB3, ITGB8, PTPRK, SELPLG, MAGI1, IL32, THEMIS2, EMILIN1, CD177	AOC3, ITGB3BP
GO:0051966	regulation of synaptic transmission, glutamatergic	4.48849	6	0.00697076	0.0398533	0.0465954	TNF, UNC13A, MAPK8IP2
GO:0017134	fibroblast growth factor binding	2.20487	1	0.0070922	0.040134	0.040134	ITGB3, THBS1
GO:2001234	negative regulation of apoptotic signaling pathway	2.79284	6	0.00697076	0.0402092	0.0470088	TNF, MAPK8IP2
GO:0004407	histone deacetylase activity	1.23214	7	0.00684932	0.0403929	0.0452173	HDAC9
GO:0006338	chromatin remodeling	1.05612	6	0.00660246	0.0407272	0.0460432	MYC	FOXA1, PER1, PER2, NPM2, TET1
GO:0030507	spectrin binding	7.3312	1	0.0070922	0.040914	0.040914	ANK1, ANK2, GBP1, PTPRN, SPTBN5, USH1G	SPTBN4
GO:0120163	negative regulation of cold-induced thermogenesis	2.27677	1	0.00719424	0.0414704	0.0414704	DDIT3, NOTCH1, FLCN	PCTP, DOCK7
GO:0005200	structural constituent of cytoskeleton	2.61829	4	0.00678036	0.0418231	0.049718	ANK1, KRT6B, KRT9, NEFH, VILL	TUBA1B, SPTBN4
GO:0043508	negative regulation of JUN kinase activity	3.49105	2	0.00671066	0.0420825	0.0454137	DUSP10	DUSP19
GO:0080025	phosphatidylinositol-3,5-bisphosphate binding	3.80842	1	0.00649351	0.0423655	0.0423655	HIP1R, JPH2, PLEKHA4, PLA2G4E
GO:0045814	negative regulation of gene expression, epigenetic	1.49616	2	0.00641131	0.0425138	0.0450191	IFI16, HDAC9
GO:0045766	positive regulation of angiogenesis	2.69035	1	0.00649351	0.0427919	0.0427919	ANXA3, F3, FGF2, HK2, CXCL8, ITGB8, THBS1, VEGFA, ADM2	CD40, HYAL1, RLN2, RRAS, RAMP2
GO:0007368	determination of left/right symmetry	4.76052	7	0.00684932	0.0428101	0.0481786	NOTCH1, DNAH11, CITED2, DNAI1, DLL1
GO:0051247	positive regulation of protein metabolic process	2.73213	1	0.00613497	0.0434414	0.0434414	CSF1, KLF4, KLF2
GO:0038023	signaling receptor activity	1.61125	1	0.00649351	0.0437178	0.0437178	CSF2RB, P2RY11, RET, SLC20A2, SQSTM1, TREM2	NGFR, TNFRSF6B
GO:0030316	osteoclast differentiation	5.51218	1	0.00649351	0.0437178	0.0437178	BMP2, CSF1, CSF1R, SLC4A2, TREM2
GO:0030674	protein-macromolecule adaptor activity	2.09463	1	0.00671141	0.0438122	0.0438122	ANK2, NEFH, SQSTM1, TRIM22, TRIM17, TRIM5, NLRP3	TRIM6, INSC
GO:0007507	heart development	3.02838	3	0.00694444	0.0438705	0.0474488	BMP2, NOTCH1, TH, HDAC9, CITED2, ALPK3, OSR1	FOXL1, TNNI3, RAMP2, ADAP2, STRA6
GO:0006094	gluconeogenesis	2.88914	2	0.00641131	0.0440024	0.0459889	ENO3, PCK2, SLC39A14	PER2
GO:0030511	positive regulation of transforming growth factor beta receptor signaling pathway	4.18926	2	0.00938172	0.0441803	0.0484721	CDKN1C, THBS1, CITED2, FLCN	SLC2A10
GO:0001701	in utero embryonic development	4.55354	4	0.00667735	0.0453466	0.0473106	BMP2, VEGFA, FLCN	IGF2, ARNT2
GO:0140313	molecular sequestering activity	2.79284	1	0.00649351	0.0458702	0.0458702	SQSTM1, XAF1
GO:0055037	recycling endosome	1.8328	2	0.00662979	0.0458719	0.0458719	TFRC, TNF, ABCB11, ABCG1, SYT11, RAB17	RAB4B
GO:0001650	fibrillar center	1.6226	1	0.00632911	0.0460363	0.0460363	KLF6, DAB2, KIT, NUAK1, SP140, ANKRD1, CEMIP, AKNA, RSAD2, FBLL1	FOXA1
GO:0090090	negative regulation of canonical Wnt signaling pathway	1.43749	1	0.00632911	0.0462496	0.0462496	BMP2, DAB2, DDIT3, GREM1, DKK3, DACT1	WNT11
GO:1902042	negative regulation of extrinsic apoptotic signaling pathway via death domain receptors	0.997443	1	0.00632911	0.0462496	0.0462496	TNFAIP3
GO:0032703	negative regulation of interleukin-2 production	1.99489	1	0.00632911	0.0462496	0.0462496	GBP1, TNFAIP3
GO:0006302	double-strand break repair	1.14253	5	0.00641026	0.0462819	0.0499393	PARP9, DTX3L, EME2
GO:0032869	cellular response to insulin stimulus	1.90421	5	0.00641026	0.0462819	0.0499393	CEACAM1, HDAC9, SLC39A14, TRIB3	GPLD1
GO:0032695	negative regulation of interleukin-12 production	4.18926	2	0.00697889	0.046622	0.0479932	THBS1	JAK3, PIBF1
GO:0032755	positive regulation of interleukin-6 production	2.54752	2	0.00641131	0.0470785	0.0484594	IL6, IL6R, LGALS9, MYD88, POU2F2, TLR2, TNF, IFIH1, CLEC7A
GO:0043525	positive regulation of neuron apoptotic process	3.49105	2	0.00631424	0.0471754	0.0493899	DDIT3, EPHA7, TNF, NUPR1
GO:0051898	negative regulation of phosphatidylinositol 3-kinase/protein kinase B signal transduction	2.05356	1	0.00719424	0.0472873	0.0472873	DDIT3, MAGI2, TREM2, FLCN	OTUD3
GO:1900745	positive regulation of p38MAPK cascade	2.51356	4	0.00667735	0.0480454	0.0494355	BMP2, VEGFA	HAND2
GO:0071539	protein localization to centrosome	2.32737	5	0.00684932	0.048246	0.048246	TRIM69	PIBF1
GO:0045070	positive regulation of viral genome replication	1.6757	1	0.00613497	0.0484721	0.0484721	IFIT1, LARP1
GO:0020037	heme binding	1.04731	5	0.00649351	0.0486149	0.0486401	CYP2D6, PTGS2, STC2
GO:0005856	cytoskeleton	1.68318	1	0.00649351	0.0486423	0.0486423	ACTG1, KRT16, NEFH, WASF1, HAP1, DNAI1	ITPKA, SMTN, FSCN3
GO:0019827	stem cell population maintenance	2.99233	1	0.0070922	0.049686	0.049686	KIT, KLF4	TET1
GO:0046597	negative regulation of viral entry into host cell	4.65473	1	0.00649351	0.0498558	0.0498558	CIITA, PTX3, IFITM1, TRIM5

## Sheet: Table 3e
ID	Term_Description	Fold_Enrichment	occurrence	support	lowest_p	highest_p	Up_regulated	Down_regulated
GO:0033209	tumor necrosis factor-mediated signaling pathway	18.3125	10	0.143285	3.72552e-09	1.40445e-06	BIRC3, NFKBIA, TNF, TNFRSF1B	TP53, TNFSF18
GO:0007249	canonical NF-kappaB signal transduction	10.3771	10	0.0616862	6.91464e-07	0.000231741	BIRC3, NFKB2, NFKBIA
GO:0006935	chemotaxis	8.64755	10	0.00653595	8.63784e-06	1.72341e-05	CXCL1, CXCL2, CXCL8, CXCL10, CCL20, CXCL5
GO:0043124	negative regulation of canonical NF-kappaB signal transduction	8.64755	10	0.0724245	9.78154e-06	0.0007016	NFKBIA, TNFAIP3, TNIP1, ZC3H12A
GO:0031674	I band	15.9647	10	0.00653595	1.3659e-05	1.3659e-05	ANKRD1	ANKRD2
GO:0038061	non-canonical NF-kappaB signal transduction	11.5301	10	0.0530899	3.11253e-05	0.00942631	BIRC3, NFKBIA
GO:0071456	cellular response to hypoxia	5.53443	10	0.0331156	0.000205289	0.009933	PTGS2, NDRG1	AQP3, TP53
GO:0002020	protease binding	7.1566	10	0.0481945	0.000260044	0.00340865	CD70, TNF, TNFAIP3	A2M, SERPINB13, TP53
GO:0004867	serine-type endopeptidase inhibitor activity	11.5301	10	0.0179144	0.000334112	0.00322249	SERPINB2	A2M, SERPINB13
GO:0140374	antiviral innate immune response	11.7921	10	0.0238808	0.000360444	0.00603658	CXCL10, TNF, ZDHHC11	IFIT2, IFIT3
GO:0005518	collagen binding	7.07527	10	0.00653595	0.000360444	0.0010065	CTSS, MMP9, C1QTNF1
GO:0006355	regulation of DNA-templated transcription	1.86974	5	0.00653595	0.000465743	0.0480969	NFKB2	GLI2, MEF2C, TP53
GO:0017053	transcription repressor complex	4.15083	9	0.00714286	0.000465743	0.0470588		TP53, ZBTB16
GO:0032715	negative regulation of interleukin-6 production	7.98236	10	0.0314914	0.000495324	0.00149532	TNF, TNFAIP3, ZC3H12A
GO:0071466	cellular response to xenobiotic stimulus	7.68671	3	0.0121212	0.000566978	0.0127091		MEF2C, TP53
GO:0001228	DNA-binding transcription activator activity, RNA polymerase II-specific	1.4931	3	0.0121212	0.000625184	0.00123756	NFKB2	ETV1, MEF2C, TP53
GO:0003700	DNA-binding transcription factor activity	1.76481	3	0.00653595	0.000625184	0.00123756	NFKB2	ETV1, GLI2, MEF2C, TP53
GO:0032731	positive regulation of interleukin-1 beta production	7.68671	7	0.0121212	0.000674385	0.0376898	IL6, TNF, NLRP3	TLR6
GO:0050729	positive regulation of inflammatory response	7.41219	10	0.0534167	0.000742966	0.00160387	NFKBIA, TNF, TNIP1, NFKBIZ, NLRP3
GO:0032088	negative regulation of NF-kappaB transcription factor activity	5.76504	10	0.0333997	0.00080931	0.00160387	NFKBIA, TNFAIP3, ZC3H12A, NLRP3
GO:0020037	heme binding	5.18853	7	0.00714286	0.00080931	0.00225572	PTGS2, STC2	CYP11A1
GO:0042531	positive regulation of tyrosine phosphorylation of STAT protein	12.2083	8	0.00691761	0.000989572	0.0435106	CSF2, IL6, TNF, IL23A	ERBB4, TNFSF18
GO:0045785	positive regulation of cell adhesion	10.3771	9	0.0130719	0.00146863	0.0239726	SAA1, TGM2, TNF	TNFSF18
GO:0005125	cytokine activity	11.9081	10	0.00653595	0.00170792	0.00170792	CD70, CSF2, CSF3, EDN1, IL6, INHBA, TNF
GO:0001533	cornified envelope	9.88292	9	0.0117647	0.00192652	0.048308		DSC1, DSG1, SPRR3, CYSRT1
GO:0043065	positive regulation of apoptotic process	2.92312	9	0.00653595	0.00202312	0.0117337	IL6, TGM2, TNF, ANKRD1	IFIT2, TP53
GO:0008104	protein localization	3.29431	9	0.00653595	0.00214032	0.0265391		TP53, LRRK2
GO:0009615	response to virus	3.11312	10	0.012524	0.00218814	0.0339708	TNF	IFIT2, IFIT3
GO:0010506	regulation of autophagy	4.32378	6	0.00723623	0.0028064	0.048308		ITPR1, LRRK2
GO:0042981	regulation of apoptotic process	5.06198	10	0.0175955	0.00284054	0.00991482	BIRC3, CXCL10, TGM2	TP53
GO:0044754	autolysosome	10.3771	8	0.00653595	0.00297468	0.00991482		LRRK2
GO:0005912	adherens junction	3.29431	7	0.00606061	0.00300841	0.00300841	NDRG1	POF1B
GO:0043068	positive regulation of programmed cell death	18.8674	10	0.0334169	0.00318051	0.00848135	TNF	LRRK2
GO:0001046	core promoter sequence-specific DNA binding	15.9647	10	0.023672	0.00336955	0.0364207		TAF4, TP53
GO:0051044	positive regulation of membrane protein ectodomain proteolysis	15.9647	10	0.0238808	0.00401267	0.00842388	TNF, TNFRSF1B
GO:0001934	positive regulation of protein phosphorylation	3.32066	9	0.0121212	0.00428911	0.0289225	MMP9, TNF	ERBB4, LRRK2
GO:0051966	regulation of synaptic transmission, glutamatergic	22.2366	10	0.0334169	0.00431625	0.0105171	TNF	MEF2C, LRRK2
GO:0043123	positive regulation of canonical NF-kappaB signal transduction	3.26837	8	0.0118704	0.00431625	0.0159575	BIRC3, TNF	ROR1, TLR6
GO:0045088	regulation of innate immune response	6.48567	3	0.00793651	0.00431625	0.00633963	BIRC3
GO:0010803	regulation of tumor necrosis factor-mediated signaling pathway	6.48567	5	0.00653595	0.00431625	0.00616098	TNFAIP3
GO:0002755	MyD88-dependent toll-like receptor signaling pathway	14.8244	9	0.0142857	0.0046809	0.0087315	TNIP1	TLR6
GO:0061629	RNA polymerase II-specific DNA-binding transcription factor binding	2.67795	3	0.00653595	0.00475442	0.00756877	ANKRD1	MEF2C, TP53, ANKRD2
GO:0072659	protein localization to plasma membrane	2.88252	6	0.00629828	0.00481398	0.0149203	TNF, RAPGEF6	PTCH1
GO:0055008	cardiac muscle tissue morphogenesis	10.3771	10	0.00653595	0.00486208	0.00486208	ANKRD1
GO:1900119	positive regulation of execution phase of apoptosis	20.7541	9	0.0121212	0.00555405	0.00841371	ZC3H12A	TP53
GO:0006096	glycolytic process	7.98236	6	0.00629828	0.00601901	0.00601901	ENO2
GO:0061621	canonical glycolysis	7.98236	6	0.00629828	0.00601901	0.00601901	ENO2
GO:0030866	cortical actin cytoskeleton organization	6.91804	4	0.00602432	0.00616098	0.00616098	TNF
GO:0045121	membrane raft	4.75285	7	0.00606061	0.00685664	0.0159575	TNF, TNFRSF1B	CD14, TLR6, SULF1, ACE2
GO:0008625	extrinsic apoptotic signaling pathway via death domain receptors	5.18853	2	0.00699856	0.0073248	0.0073248	TNF
GO:0030666	endocytic vesicle membrane	2.80461	1	0.00793651	0.00733561	0.00733561		PTCH1, ACE2
GO:0043122	regulation of canonical NF-kappaB signal transduction	5.46161	8	0.00653595	0.00789587	0.0216178	TNF
GO:0002244	hematopoietic progenitor cell differentiation	18.8674	6	0.00626199	0.00792013	0.00792013	INHBA	TP53
GO:0070498	interleukin-1-mediated signaling pathway	4.94146	9	0.0142857	0.00809488	0.0150935	NFKBIA
GO:0051092	positive regulation of NF-kappaB transcription factor activity	4.1843	7	0.00653595	0.00817387	0.0226996	IL6, TNF, NLRP3	ROR1, TNFSF18
GO:0030330	DNA damage response, signal transduction by p53 class mediator	12.9713	10	0.0558442	0.0086325	0.0277244	NDRG1	TP53
GO:0048566	embryonic digestive tract development	28.3011	2	0.00586515	0.00881358	0.0146893	CXCL8, TNF	GLI2
GO:0031267	small GTPase binding	1.9457	10	0.0108328	0.00901127	0.0222112	NDRG1, RAPGEF6	LRRK2
GO:0000976	transcription cis-regulatory region binding	2.55593	8	0.00653595	0.00913844	0.0178374	TNF	ERBB4, MEF2C, TP53, ATOH7
GO:0000785	chromatin	1.62777	3	0.0121212	0.00914552	0.0222663	TGM2, L3MBTL1	TAF4, TP53
GO:0034142	toll-like receptor 4 signaling pathway	8.30165	9	0.0130719	0.00924692	0.0158197	NFKBIA	CD14
GO:0051059	NF-kappaB binding	4.15083	10	0.0068394	0.00924692	0.0270409	NFKBIA
GO:0002230	positive regulation of defense response to virus by host	13.5353	9	0.00653595	0.00957152	0.0178374	IL23A, ZDHHC11, ZC3H12A
GO:0032691	negative regulation of interleukin-1 beta production	11.5301	10	0.0362122	0.00957152	0.0179742	TNFAIP3, ZC3H12A, NLRP3
GO:0042307	positive regulation of protein import into nucleus	3.70609	9	0.00653595	0.00957152	0.0178374	ZC3H12A
GO:1901223	negative regulation of non-canonical NF-kappaB signal transduction	7.1566	10	0.012524	0.00957152	0.0325941	ZC3H12A, NLRP3
GO:0008017	microtubule binding	1.59647	8	0.00629828	0.00965353	0.0268029	NDRG1	LRRK2
GO:0019855	calcium channel inhibitor activity	11.5301	3	0.00598802	0.0101752	0.0101752		ITPR1
GO:0005513	detection of calcium ion	8.64755	3	0.00598802	0.0101752	0.0101752		RYR2
GO:0034145	positive regulation of toll-like receptor 4 signaling pathway	8.64755	4	0.00602432	0.0101872	0.0101872		CD14
GO:0035591	signaling adaptor activity	8.64755	9	0.00714286	0.0102496	0.0194809	ZDHHC11, NLRP3	BLNK
GO:0098586	cellular response to virus	11.2184	10	0.012524	0.0102496	0.0385716	IL6, CXCL10, ZC3H12A, NLRP3
GO:0140693	molecular condensate scaffold activity	5.32157	10	0.0108328	0.0103646	0.0416098	NLRP3	BLNK
GO:0097191	extrinsic apoptotic signaling pathway	12.2083	3	0.00793651	0.0107959	0.0172734	CD70, INHBA, TNF, G0S2
GO:0051604	protein maturation	3.05208	4	0.00691761	0.0107959	0.0431835	NLRP3
GO:0043280	positive regulation of cysteine-type endopeptidase activity involved in apoptotic process	5.06198	10	0.0186275	0.0126136	0.0401744	TNF, NLRP3
GO:0004842	ubiquitin-protein transferase activity	1.16596	8	0.00629828	0.0128043	0.04868	BIRC3, TNFAIP3
GO:0042475	odontogenesis of dentin-containing tooth	6.91804	2	0.00696227	0.0129461	0.0161764		GLI2
GO:0007389	pattern specification process	10.3771	3	0.00588235	0.0129625	0.0129625		GLI2
GO:0001774	microglial cell activation	6.91804	7	0.00606061	0.0131862	0.0131862	TNF
GO:1902004	positive regulation of amyloid-beta formation	5.46161	7	0.00606061	0.0131862	0.0131862	TNF
GO:0000981	DNA-binding transcription factor activity, RNA polymerase II-specific	1.90405	2	0.00629828	0.0132002	0.0334232		MEF2C, TP53
GO:0071222	cellular response to lipopolysaccharide	13.4291	9	0.0179641	0.0134272	0.0187804	IL6, CXCL8, CXCL10, MMP9, TNFAIP3, TNFRSF1B, ANKRD1, ZC3H12A, NLRP3	CD14, MEF2C
GO:0031625	ubiquitin protein ligase binding	1.25025	10	0.0117303	0.0135567	0.0466788	NFKBIA, TNFRSF1B	TP53
GO:0045429	positive regulation of nitric oxide biosynthetic process	15.9647	10	0.0139971	0.0140129	0.022873	EDN1, PTGS2, TNF	TLR6
GO:0010875	positive regulation of cholesterol efflux	8.64755	9	0.0142857	0.0140129	0.0396533	NFKBIA	PTCH1
GO:1901224	positive regulation of non-canonical NF-kappaB signal transduction	6.62366	10	0.0197049	0.0144476	0.0464651	TNF, IL23A, NLRP3
GO:0042771	intrinsic apoptotic signaling pathway in response to DNA damage by p53 class mediator	5.76504	4	0.0068394	0.0145421	0.0235991		TP53
GO:0072332	intrinsic apoptotic signaling pathway by p53 class mediator	5.76504	2	0.00657361	0.0145421	0.0440102		TP53
GO:0008134	transcription factor binding	4.71685	1	0.00584795	0.0145421	0.0145421		IGHMBP2
GO:0007159	leukocyte cell-cell adhesion	9.02353	10	0.0197049	0.0145421	0.0403851	ICAM1, TNIP1
GO:0055117	regulation of cardiac muscle contraction	5.46161	3	0.00598802	0.0146185	0.0146185		RYR2
GO:0034704	calcium channel complex	5.18853	3	0.00598802	0.0146185	0.0146185		RYR2
GO:0030574	collagen catabolic process	10.3771	10	0.00653595	0.0146496	0.0221332	CTSS, MMP9
GO:0046677	response to antibiotic	9.43369	10	0.00653595	0.0146893	0.0341641		TP53
GO:0016887	ATP hydrolysis activity	3.61991	4	0.00602432	0.0146893	0.0260724	SLFN11, NLRP3	IGHMBP2
GO:0048147	negative regulation of fibroblast proliferation	5.76504	2	0.00629828	0.0152889	0.0334232		TP53
GO:0043507	positive regulation of JUN kinase activity	11.1183	7	0.0117647	0.0156206	0.04868	EDN1, TNF	TLR6
GO:0046427	positive regulation of receptor signaling pathway via JAK-STAT	10.7349	7	0.011976	0.0156353	0.0178374	IL6, TNF	ERBB4
GO:2000379	positive regulation of reactive oxygen species metabolic process	8.64755	9	0.0121212	0.0160404	0.042791	ZC3H12A	TP53
GO:1902895	positive regulation of miRNA transcription	4.94146	10	0.0249767	0.0164411	0.0282438	TNF	TP53
GO:0090200	positive regulation of release of cytochrome c from mitochondria	9.43369	9	0.0117647	0.0166097	0.0368853	MMP9	TP53
GO:0051592	response to calcium ion	3.34744	10	0.00653595	0.0166954	0.0305865		AQP3
GO:0045732	positive regulation of protein catabolic process	3.84336	10	0.018786	0.0169066	0.0436886	TNF, TNFAIP3
GO:0007169	cell surface receptor protein tyrosine kinase signaling pathway	3.45902	7	0.0117647	0.0178374	0.0234309		ERBB4
GO:0031398	positive regulation of protein ubiquitination	4.32378	8	0.00629828	0.0179305	0.0479554	BIRC3	LRRK2
GO:0045071	negative regulation of viral genome replication	5.06198	10	0.02945	0.0180195	0.034243	TNF, TNIP1
GO:1990841	promoter-specific chromatin binding	5.46161	4	0.00602432	0.0180295	0.0447979		GLI2, TP53
GO:0031571	mitotic G1 DNA damage checkpoint signaling	10.3771	7	0.00653595	0.0180336	0.0364207		TP53
GO:2001240	negative regulation of extrinsic apoptotic signaling pathway in absence of ligand	10.9232	10	0.0130719	0.0184514	0.0184514	CSF2, TNF
GO:0031507	heterochromatin formation	6.48567	6	0.00629828	0.0185135	0.0185135	L3MBTL1
GO:0002027	regulation of heart rate	4.15083	3	0.00598802	0.0187275	0.0187275		RYR2
GO:0051209	release of sequestered calcium ion into cytosol	7.98236	3	0.00598802	0.0187275	0.0187275		ITPR1, RYR2
GO:0030971	receptor tyrosine kinase binding	3.24283	8	0.0117303	0.0190271	0.0489853		TP53
GO:0043406	positive regulation of MAP kinase activity	6.10416	8	0.0068394	0.0191903	0.0435106	EDN1, TNF	LRRK2
GO:0042149	cellular response to glucose starvation	5.32157	5	0.00653595	0.0194809	0.0401744	ZC3H12A	TP53
GO:0045879	negative regulation of smoothened signaling pathway	5.76504	3	0.00653595	0.0203852	0.0244622		PTCH1
GO:0006094	gluconeogenesis	3.5783	6	0.00629828	0.0208471	0.0208471	ENO2
GO:0030424	axon	3.21769	8	0.00629828	0.0209424	0.0235547	SRCIN1	IGHMBP2, LRRK2, ATOH7
GO:0061001	regulation of dendritic spine morphogenesis	12.2083	8	0.00761789	0.0209424	0.0235547	SRCIN1	LRRK2
GO:0097718	disordered domain specific binding	5.46161	10	0.00653595	0.0210662	0.0384442		TP53
GO:0006952	defense response	9.43369	9	0.0130719	0.0215542	0.0464651	INHBA, IL32, TNIP1, NLRP3
GO:0031397	negative regulation of protein ubiquitination	2.35842	8	0.0109385	0.0215542	0.0479519	TNFAIP3
GO:1903078	positive regulation of protein localization to plasma membrane	2.25588	6	0.00653595	0.0215542	0.0479554	TNF
GO:0007266	Rho protein signal transduction	3.45902	1	0.00653595	0.0215917	0.0215917		LRRK2
GO:0035556	intracellular signal transduction	2.80461	5	0.00598802	0.0230304	0.0230304	CXCL1, CXCL8	BLNK, LRRK2
GO:0004714	transmembrane receptor protein tyrosine kinase activity	5.46161	5	0.00598802	0.0230304	0.0230304		ERBB4
GO:0016323	basolateral plasma membrane	1.99559	5	0.00598802	0.0230304	0.0230304	CLDN1	AQP3, ERBB4
GO:0043130	ubiquitin binding	1.99559	5	0.00714286	0.0233665	0.0467331	TNFAIP3
GO:0051247	positive regulation of protein metabolic process	9.02353	8	0.00653595	0.0234309	0.0466133	INHBA, NFKBIA
GO:0016310	phosphorylation	3.70609	7	0.00653595	0.0234309	0.0488912		LRRK2
GO:0000149	SNARE binding	5.76504	7	0.00653595	0.0235547	0.0235547		LRRK2
GO:0032211	negative regulation of telomere maintenance via telomerase	5.76504	10	0.0068394	0.0235991	0.0339708		TP53
GO:0071479	cellular response to ionizing radiation	3.24283	1	0.00584795	0.0237201	0.0237201		TP53
GO:0018107	peptidyl-threonine phosphorylation	2.47073	5	0.00653595	0.0239234	0.048308		LRRK2
GO:0034614	cellular response to reactive oxygen species	4.94146	5	0.00653595	0.0239234	0.048308	MMP9	LRRK2
GO:0016301	kinase activity	2.30601	5	0.00653595	0.0239234	0.048308		LRRK2
GO:0032091	negative regulation of protein binding	4.15083	5	0.00653595	0.0239234	0.048308		IFIT2, LRRK2
GO:0032436	positive regulation of proteasomal ubiquitin-dependent protein catabolic process	2.07541	5	0.00653595	0.0239234	0.048308		LRRK2
GO:0006914	autophagy	1.85305	4	0.0068394	0.0243073	0.045692		TP53
GO:0030425	dendrite	1.33039	1	0.00598802	0.0245505	0.0245505	SRCIN1	LRRK2
GO:0032757	positive regulation of interleukin-8 production	5.18853	1	0.00606061	0.0246964	0.0246964	IL6, TNF	CD14
GO:0006654	phosphatidic acid biosynthetic process	7.68671	9	0.00653595	0.0270409	0.0270409		DGKG, LIPH
GO:0007517	muscle organ development	9.43369	1	0.00729927	0.0270866	0.0270866	CXCL10	LAMA2, MEF2C, NEB
GO:0031334	positive regulation of protein-containing complex assembly	2.41327	7	0.00606061	0.0277742	0.0277742	TNF
GO:0030593	neutrophil chemotaxis	10.7349	4	0.00620915	0.0285028	0.0285028	EDN1, CXCL3, CXCL8
GO:0019722	calcium-mediated signaling	10.6431	6	0.00653595	0.0285028	0.0313894	EDN1, CXCL8	RYR2, LRRK2
GO:0010508	positive regulation of autophagy	3.34744	3	0.00714286	0.0288118	0.0465716	ZC3H12A	LRRK2
GO:0015485	cholesterol binding	2.30601	3	0.00729927	0.0290407	0.0413032		PTCH1
GO:0033138	positive regulation of peptidyl-serine phosphorylation	4.41577	6	0.00722106	0.0290407	0.0464651	IL6, TNF
GO:0001530	lipopolysaccharide binding	7.41219	4	0.00602432	0.0291175	0.0291175	RNASE7	CD14
GO:0005901	caveola	2.07541	3	0.00729927	0.0292397	0.0431938		PTCH1
GO:0071480	cellular response to gamma radiation	6.10416	9	0.00653595	0.0306884	0.0306884		TP53
GO:0050728	negative regulation of inflammatory response	2.53099	3	0.00729927	0.0317741	0.0457832	TNFAIP3, NLRP3
GO:0018108	peptidyl-tyrosine phosphorylation	2.16189	7	0.00606061	0.032275	0.0484781		ERBB4
GO:1902042	negative regulation of extrinsic apoptotic signaling pathway via death domain receptors	9.88292	3	0.00606061	0.0336013	0.0378293	ICAM1, TNFAIP3
GO:2000352	negative regulation of endothelial cell apoptotic process	7.68671	3	0.00606061	0.0336013	0.0378293	ICAM1, TNFAIP3
GO:0007224	smoothened signaling pathway	7.98236	1	0.00588235	0.0346397	0.0346397		GLI2, PTCH1
GO:0006979	response to oxidative stress	3.29431	1	0.00990099	0.0348953	0.0348953	VNN1	LRRK2
GO:0004177	aminopeptidase activity	9.43369	7	0.00606061	0.0356133	0.0356133		METAP2, TRHDE
GO:0060348	bone development	14.1505	4	0.00597148	0.0356133	0.0356133	STC1, TGM2	SULF1
GO:0001222	transcription corepressor binding	2.59427	9	0.00653595	0.0358785	0.0399992		ZBTB16
GO:0050727	regulation of inflammatory response	2.20789	2	0.00761789	0.0361106	0.0413219	BIRC3
GO:0061436	establishment of skin barrier	9.88292	4	0.0068394	0.0365968	0.0453059	CLDN1	CYSRT1
GO:0001618	virus receptor activity	8.64755	2	0.00667994	0.0365968	0.0365968	CLDN1	ACE2
GO:0090303	positive regulation of wound healing	3.99118	2	0.00667994	0.0365968	0.0365968	CLDN1
GO:0140313	molecular sequestering activity	13.8361	5	0.00793651	0.037315	0.0466133	NFKBIA, XAF1
GO:0071889	14-3-3 protein binding	4.32378	6	0.00629828	0.0374347	0.0466133		TP53
GO:0016605	PML body	2.84303	1	0.00793651	0.0374411	0.0374411		TP53, ZBTB16
GO:0090734	site of DNA damage	3.14456	6	0.00629828	0.0406481	0.0406481	SLFN11
GO:0070971	endoplasmic reticulum exit site	5.18853	6	0.00602432	0.0409971	0.0409971		LRRK2
GO:0022617	extracellular matrix disassembly	7.59297	3	0.00793651	0.0420454	0.044097	CTSS, MMP9	KLK7
GO:0097193	intrinsic apoptotic signaling pathway	4.71685	1	0.00606061	0.0424307	0.0424307		TP53
GO:0019005	SCF ubiquitin ligase complex	3.24283	1	0.00606061	0.0430209	0.0430209		FBXO32
GO:0101003	ficolin-1-rich granule membrane	5.46161	4	0.00626199	0.0442097	0.0442097	SLC2A3	DSC1, DSG1
GO:0031641	regulation of myelination	8.64755	1	0.00653595	0.0447446	0.0447446	TNFRSF1B
GO:0032720	negative regulation of tumor necrosis factor production	4.23554	8	0.00629828	0.0449322	0.0449322	TNFAIP3, ZC3H12A
GO:0050714	positive regulation of protein secretion	2.88252	10	0.00653595	0.0452058	0.0452058	ANKRD1
GO:0045095	keratin filament	9.88292	6	0.0068394	0.0453059	0.0453059		KRT4, KRT13
GO:0016579	protein deubiquitination	3.91587	8	0.00629828	0.0468092	0.0468092	TNFAIP3, ZC3H12A
GO:0018105	peptidyl-serine phosphorylation	1.31355	1	0.00990099	0.0470744	0.0470744		LRRK2
GO:0004674	protein serine/threonine kinase activity	0.830165	1	0.00793651	0.048308	0.048308	MAPK4	LRRK2

## Sheet: Table 3f
ID	Term_Description	Fold_Enrichment	occurrence	support	lowest_p	highest_p	Up_regulated	Down_regulated
GO:0044754	autolysosome	17.2249	10	0.0790071	1.37536e-05	0.000125695	FTH1, FTL, SQSTM1
GO:0031994	insulin-like growth factor I binding	10.4393	2	0.00684964	1.89075e-05	2.70035e-05		IGFBP3, INSR
GO:0004713	protein tyrosine kinase activity	3.64548	9	0.0137931	2.98488e-05	0.0241052	CSF1R, ROS1, TTN	INSR
GO:0001666	response to hypoxia	6.37958	9	0.0147059	4.68074e-05	0.0148045	DPP4, RYR2, TGFB2, EGLN3	EGR1, ITPR1, NOS1
GO:0016234	inclusion body	8.20232	10	0.0294118	5.95299e-05	5.95299e-05	SQSTM1, HAP1
GO:0044598	doxorubicin metabolic process	17.2249	10	0.0219783	5.95299e-05	0.000125695	AKR1C1, AKR1C2, AKR1B10
GO:0030424	axon	2.67052	10	0.013213	6.10637e-05	0.0185505	CALB1, NEFM, NEFL, TGFB2, SYT11, SRCIN1
GO:0031674	I band	13.2499	4	0.0066534	0.000141724	0.0465954	TTN, ANKRD1, MYPN
GO:0006879	intracellular iron ion homeostasis	4.99272	10	0.0126851	0.000203357	0.0114017	FTH1, FTL, TF, SLC40A1
GO:0055117	regulation of cardiac muscle contraction	9.06572	10	0.0143915	0.00028989	0.0175422	GJA5, RYR2	NOS1
GO:0050680	negative regulation of epithelial cell proliferation	7.17703	2	0.00661765	0.000565999	0.000565999	TGFB2, TGFBR3, DUSP10, NUPR1
GO:0007155	cell adhesion	2.67942	2	0.0061463	0.00060107	0.000996615	CDH2, CCR3, ITGAM, ITGB8, NID2, CD177	CYP1B1
GO:0030054	cell junction	3.42216	10	0.0127789	0.00078532	0.0349574	CDH2, PTPRR, TP73, CLDN9, PARD3B, PLEKHA7	CCDC170, BRSK1, MPP7
GO:0031334	positive regulation of protein-containing complex assembly	6.67631	2	0.007051	0.00140518	0.00140518	MMP3, TFRC, CLEC7A, BMF	MPP7
GO:0030674	protein-macromolecule adaptor activity	2.55183	2	0.00661765	0.00181043	0.0432901	ATP1B2, FXYD2, NEFL, SQSTM1
GO:0001540	amyloid-beta binding	6.04382	10	0.0139888	0.00186824	0.0352519	CD74, GRIN1, TGFB2, TREM2	INSR, NGFR
GO:0043065	positive regulation of apoptotic process	2.15648	10	0.0126851	0.00423055	0.0495912	IL6, TGM2, SQSTM1, ANKRD1, SHQ1, BMF	CYP1B1, IGFBP3
GO:0033138	positive regulation of peptidyl-serine phosphorylation	4.88649	10	0.00719573	0.00479116	0.0079361	IL6, TFRC, TENM1	NOS1
GO:0005901	caveola	3.44497	2	0.007051	0.00479116	0.00479116		INSR, PTCH1, ADTRP
GO:0030018	Z disc	4.86578	8	0.00719573	0.00480502	0.0100949	RYR2, TTN, NEBL, MYPN, NEXN
GO:0010468	regulation of gene expression	2.82375	10	0.00719573	0.00582202	0.00798989	AHR, TP73, TREM2
GO:0030669	clathrin-coated endocytic vesicle membrane	3.32848	10	0.0077594	0.00593492	0.0352519	CD74, IL7R, TF, TFRC
GO:0010008	endosome membrane	1.63114	5	0.00735294	0.00631769	0.0330134	TF, TFRC, ZDHHC11	INSR, TICAM2
GO:0097242	amyloid-beta clearance	8.83327	5	0.00689655	0.00721579	0.017338	ITGAM	INSR
GO:0010633	negative regulation of epithelial cell migration	8.83327	10	0.00719573	0.00721579	0.0440679	PTPRR, DUSP10
GO:0043548	phosphatidylinositol 3-kinase binding	5.74162	2	0.00684964	0.00721579	0.00901682		INSR
GO:0001934	positive regulation of protein phosphorylation	3.21531	10	0.0138949	0.00792922	0.0397472	CD74, CSF1R, TFRC, GPNMB, TREM2	INSR, ADTRP
GO:0007586	digestion	11.4832	10	0.0184389	0.00833107	0.0242303	AKR1C1, AKR1C2
GO:0045202	synapse	1.95737	1	0.00641026	0.00833107	0.00833107	GRIN1, SRCIN1	NOS1
GO:0006941	striated muscle contraction	9.56937	10	0.0077594	0.00894891	0.0372981	TTN	NOS1
GO:0005513	detection of calcium ion	4.78469	8	0.00719573	0.00894891	0.0123314	RYR2
GO:0060314	regulation of ryanodine-sensitive calcium-release channel activity	9.56937	9	0.008	0.00894891	0.0264322	JPH2	NOS1
GO:0030335	positive regulation of cell migration	2.59508	3	0.00680272	0.00899113	0.0374551	CLDN1, CCL26, GPNMB, CLEC7A	HAS2, INSR, CEACAM6, FAM110C
GO:0060076	excitatory synapse	8.20232	4	0.0066534	0.00970956	0.0465954	GRIN1, SYT11
GO:0097060	synaptic membrane	3.82775	1	0.00641026	0.00970956	0.00970956	GRIN1
GO:2001222	regulation of neuron migration	11.4832	9	0.008	0.0100949	0.025444	CAMK2A, CAMK2B
GO:0005516	calmodulin binding	4.41663	4	0.00722257	0.0100949	0.0465954	CAMK2A, GRIN1, RYR2, TTN	NGFR
GO:0019855	calcium channel inhibitor activity	6.37958	1	0.00588235	0.0100949	0.0100949		ITPR1
GO:0002028	regulation of sodium ion transport	11.4832	1	0.00588235	0.0100949	0.0100949		NOS1, SPTBN4
GO:0018105	peptidyl-serine phosphorylation	2.18036	3	0.00689655	0.0101752	0.0212242	CAMK2A, CAMK2B	BRSK1
GO:0005768	endosome	2.56609	5	0.0070922	0.0127409	0.0493395	SLC6A9, TFRC, PLEKHF1	ADRA2C, NGFR, ARRDC3, ARRDC4, TICAM2
GO:0046777	protein autophosphorylation	2.0803	3	0.0136054	0.0136186	0.0426604	CAMK2A, CAMK2B, CSF1R	INSR, FAM20C
GO:0038024	cargo receptor activity	7.17703	3	0.0070922	0.0138622	0.017338	ITGAM	INSR
GO:0004033	aldo-keto reductase (NADPH) activity	11.4832	10	0.0136993	0.0140229	0.0242303	AKR1C1, AKR1B10
GO:0010881	regulation of cardiac muscle contraction by regulation of the release of sequestered calcium ion	4.78469	10	0.00719573	0.0140412	0.0214292	RYR2
GO:0034237	protein kinase A regulatory subunit binding	3.82775	10	0.00719573	0.0140412	0.0214292	RYR2
GO:0035584	calcium-mediated signaling using intracellular calcium source	3.02191	10	0.00719573	0.0140412	0.0214292	RYR2
GO:0034704	calcium channel complex	2.87081	10	0.0139888	0.0140412	0.0214292	RYR2
GO:2000463	positive regulation of excitatory postsynaptic potential	5.74162	1	0.00641026	0.0140412	0.0140412	GRIN1, RELN
GO:0000976	transcription cis-regulatory region binding	1.69703	1	0.00735294	0.0148045	0.0148045	AHR, TP73, KLF1, CREB3L1	EGR1, MESP1
GO:0051480	regulation of cytosolic calcium ion concentration	2.39234	10	0.00719573	0.0158197	0.022873	RYR2
GO:0002027	regulation of heart rate	2.29665	10	0.0139888	0.0158197	0.022873	RYR2
GO:0015820	L-leucine transport	5.74162	1	0.00735294	0.0166621	0.0166621	SLC7A7
GO:0140036	ubiquitin-modified protein reader activity	5.21966	8	0.00699438	0.0169357	0.0295982	SQSTM1
GO:0035458	cellular response to interferon-beta	3.58852	1	0.00588235	0.0170823	0.0170823	CAMK2A
GO:0043123	positive regulation of canonical NF-kappaB signal transduction	1.80839	8	0.00732611	0.0186644	0.0445526	CD74, S100A4, TFRC, CLEC7A
GO:0051209	release of sequestered calcium ion into cytosol	4.41663	3	0.00735294	0.0187275	0.022873	RYR2	ITPR1
GO:0016529	sarcoplasmic reticulum	5.46821	8	0.00719573	0.0202846	0.0279368	RYR2	NOS1
GO:0055008	cardiac muscle tissue morphogenesis	11.4832	5	0.0070922	0.0210343	0.0465954	TTN, ANKRD1
GO:0002020	protease binding	3.95974	7	0.00729927	0.0215683	0.0457997	CD70, DPP4, SERPINF2, TTN, CD177	FAM20C
GO:0005788	endoplasmic reticulum lumen	2.11868	2	0.00767647	0.0215683	0.0442311	CDH2, COL11A2, IL6, PTGS2, TF, COL21A1, AMTN	COL6A2, IGFBP3, FAM20C
GO:0042574	retinal metabolic process	14.3541	10	0.00719573	0.023138	0.031229	AKR1C1	ALDH1A3, CYP1B1
GO:0031410	cytoplasmic vesicle	2.0803	6	0.00699438	0.0239395	0.0431897	GBP2, SLC1A3, TF, TFRC	RHCG
GO:0030890	positive regulation of B cell proliferation	4.41663	3	0.0070922	0.02497	0.0320538	CD74, TFRC
GO:0070633	transepithelial transport	11.4832	2	0.00699438	0.025444	0.035332	ABCC2, SLC1A3
GO:0045109	intermediate filament organization	4.10116	9	0.0070922	0.0256995	0.0364207	NEFL
GO:0060048	cardiac muscle contraction	4.25306	8	0.00719573	0.0263233	0.0362409	RYR2, TTN
GO:0050770	regulation of axonogenesis	5.21966	1	0.00588235	0.0264322	0.0264322		BRSK1
GO:0050321	tau-protein kinase activity	4.41663	1	0.00588235	0.0264322	0.0264322		BRSK1
GO:0009897	external side of plasma membrane	2.20832	2	0.00767647	0.0266797	0.0446586	ATP1B2, TFRC, TGFBR3	INSR
GO:0030010	establishment of cell polarity	7.17703	1	0.00588235	0.027086	0.027086		BRSK1, MPP7
GO:0055085	transmembrane transport	3.91474	4	0.00722257	0.027157	0.0403941	FXYD2, ABCC2, SLC47A2
GO:0045171	intercellular bridge	2.05058	1	0.00641026	0.0279575	0.0279575	GPX2, NUPR1, TUBB2B
GO:0043523	regulation of neuron apoptotic process	6.37958	9	0.00735294	0.0282789	0.0431632	EGLN3	EGR1
GO:0051443	positive regulation of ubiquitin-protein transferase activity	8.83327	1	0.00735294	0.0288632	0.0288632		ARRDC3, ARRDC4
GO:0005905	clathrin-coated pit	3.70427	4	0.0100867	0.0305865	0.0428577	TF, TFRC
GO:0046579	positive regulation of Ras protein signal transduction	3.82775	3	0.00689655	0.0306987	0.0397472	NGF
GO:1902895	positive regulation of miRNA transcription	4.10116	8	0.00709791	0.0308971	0.0497515	TGFB2	EGR1, NGFR
GO:0051592	response to calcium ion	1.85214	8	0.00719573	0.0313485	0.0431492	TTN
GO:0008307	structural constituent of muscle	5.21966	8	0.00719573	0.0323407	0.0445096	MYL5, TTN, NEXN
GO:0005882	intermediate filament	2.87081	9	0.0070922	0.0325494	0.0461066	KRT75
GO:0045742	positive regulation of epidermal growth factor receptor signaling pathway	5.21966	9	0.0070922	0.0325494	0.0461066	HAP1, AGR2
GO:0043232	intracellular non-membrane-bounded organelle	4.10116	7	0.0070922	0.0336667	0.037315	SQSTM1
GO:0005001	transmembrane receptor protein tyrosine phosphatase activity	8.20232	8	0.00732611	0.0336667	0.0420686	PTPRR	PTPRZ1
GO:0004896	cytokine receptor activity	8.20232	10	0.00732611	0.0336667	0.0336667	CD74, IL7R
GO:0008089	anterograde axonal transport	4.5933	10	0.0139888	0.0337907	0.0345821	NEFL, HAP1
GO:0016323	basolateral plasma membrane	2.57637	3	0.00735294	0.0345456	0.0374551	SLC6A9, TFRC, SLC7A7, CLDN1, SLC40A1, NDRG4	RHCG
GO:0019373	epoxygenase P450 pathway	11.4832	1	0.0070922	0.035332	0.035332	CYP4F12	CYP1B1
GO:0046598	positive regulation of viral entry into host cell	8.83327	4	0.0077594	0.0360673	0.0360673	CD74, TMPRSS2
GO:0046427	positive regulation of receptor signaling pathway via JAK-STAT	5.93961	1	0.00588235	0.0371683	0.0371683	CAMK2A, IL6	CYP1B1
GO:0070830	bicellular tight junction assembly	4.99272	2	0.0068816	0.0374551	0.0374551	CLDN1	MPP7
GO:0090303	positive regulation of wound healing	6.62495	2	0.0068816	0.0374551	0.0374551	CLDN1, DUOX2, CLEC7A
GO:0071222	cellular response to lipopolysaccharide	3.37743	1	0.0075188	0.0375609	0.0375609	GBP2, IL6, MMP3, ANKRD1	TICAM2
GO:0035556	intracellular signal transduction	1.93974	1	0.00588235	0.0380968	0.0380968	CAPS, TFRC, TGFBR3, SQSTM1, BLNK
GO:0051895	negative regulation of focal adhesion assembly	3.82775	8	0.00722257	0.0388382	0.0485292	APOD
GO:2001244	positive regulation of intrinsic apoptotic signaling pathway	2.49636	3	0.00689655	0.0393279	0.0431897	NUPR1
GO:0010875	positive regulation of cholesterol efflux	4.78469	2	0.007051	0.0393279	0.0393279	TREM2	PTCH1
GO:0045429	positive regulation of nitric oxide biosynthetic process	6.62495	3	0.00689655	0.0393279	0.0431897	PTGS2, CLEC7A	INSR
GO:0140311	protein sequestering activity	2.20832	3	0.00689655	0.0393279	0.0431897	SQSTM1
GO:0044877	protein-containing complex binding	1.79426	3	0.00689655	0.0393279	0.0431897	GRIN1, PSG9, TFRC, TREM2	INSR
GO:0005509	calcium ion binding	2.9105	4	0.00699438	0.0394656	0.0465954	CALB1, CDH2, DNASE1L3, GRIN1, MMP12, MMP13, S100A5, TGM2, TTN, SYT11, DUOX2
GO:0043197	dendritic spine	3.07587	3	0.00689655	0.0398533	0.0465954	CAMK2A, GRIN1, SYT11
GO:0043525	positive regulation of neuron apoptotic process	4.78469	2	0.00661765	0.0399803	0.0399803	TGFB2, NUPR1
GO:0045787	positive regulation of cell cycle	4.41663	2	0.00661765	0.0399803	0.0399803	TGFB2, NUPR1
GO:0071346	cellular response to type II interferon	3.58852	1	0.00588235	0.0405704	0.0405704	CAMK2A, GBP2
GO:0006805	xenobiotic metabolic process	3.18979	1	0.0070922	0.0418115	0.0418115	AHR, ABCC2, AKR1C1, CYP4F12	CYP1B1
GO:0008630	intrinsic apoptotic signaling pathway in response to DNA damage	3.02191	1	0.00735294	0.0419849	0.0419849	TP73
GO:0002931	response to ischemia	7.82949	2	0.00659081	0.0426604	0.0426604	CAMK2A, CSF1R	EGR1
GO:0030139	endocytic vesicle	2.87081	1	0.00729927	0.0447979	0.0447979	DPP4, TF
GO:1900182	positive regulation of protein localization to nucleus	3.58852	3	0.00689655	0.0460095	0.0493395	TFRC	NGFR
GO:0008286	insulin receptor signaling pathway	1.5949	2	0.00684964	0.0464043	0.0482895		INSR
GO:0032148	activation of protein kinase B activity	6.37958	1	0.00680272	0.0470436	0.0470436		ADRA2C, INSR
GO:1903078	positive regulation of protein localization to plasma membrane	3.74454	2	0.00744828	0.0475491	0.0475491	SQSTM1, AGR2, TREM2
GO:0045211	postsynaptic membrane	1.43541	1	0.00641026	0.047838	0.047838	GRIN1
GO:0061629	RNA polymerase II-specific DNA-binding transcription factor binding	1.48171	1	0.008	0.048168	0.048168	AHR, TP73, ANKRD1, BEX1
GO:0035235	ionotropic glutamate receptor signaling pathway	5.74162	1	0.00689655	0.0482962	0.0482962	GRIN1
GO:0008542	visual learning	5.21966	1	0.00689655	0.0482962	0.0482962	GRIN1
GO:0001516	prostaglandin biosynthetic process	8.83327	1	0.00689655	0.0482962	0.0482962	CD74, PTGS2
GO:0051968	positive regulation of synaptic transmission, glutamatergic	8.20232	1	0.00689655	0.0482962	0.0482962	GRIN1, RELN
GO:0004252	serine-type endopeptidase activity	5.02392	1	0.00689655	0.0482962	0.0482962	C1S, DPP4, MMP2, MMP3, MMP12, MMP13, TMPRSS2
GO:1900273	positive regulation of long-term synaptic potentiation	7.6555	1	0.00689655	0.0482962	0.0482962	RELN, SQSTM1
GO:0001774	microglial cell activation	7.6555	1	0.00689655	0.0482962	0.0482962	ITGAM, TREM2
GO:0031295	T cell costimulation	1.97987	2	0.00659081	0.0499138	0.0499138	DPP4
